# Supplementary material for: Investigating the effects of management practice on mammalian co-occurrence along the West Coast of South Africa
Source: PeerJ. 2020 Jan 27;8:e8184. doi: 10.7717/peerj.8184 (PMC6991126; doi:10.7717/peerj.8184)
Supplement: Dataset S1 [file peerj-08-8184-s003.xlsx]

## Sheet: Metadata
Abstract for the dataset.
Study area: This study took place in the nutrient-poor Fynbos Biome, along the west coast of South Africa, where annual average rainfall varies between 152 mm in the north and 265 mm in the south. The predominant vegetation type of the region is Strandveld which is dominated by sclerophyllous, broad-leaved shrubs that form communities of medium density to closed shrublands (Mucina and Rutherford …
Deborah J. Winterton and Nicola J. van Wilgen
Cape Research Centre, SANParks Scientific Services, Western Cape, South Africa
Excel spreadsheet and any other column data (e.g. Access tables) need to be exported as text files. For each column in the text file the following information is needed.
Camera site_Data
Column heading	Column description	Measurement unit	Measurement bounds
Site_ID	unique site identification code	NA	NA
Scenario	Name of the three management secenarios - Postberg, Bottleray and Lamberts bay (Farm)	categorical	NA
Camera_ID	unique camera number	NA	NA
Latitude	Latitude	decimal degrees
Longitude	Longitude	decimal degrees
Slope	flat, moderate or steep as assessed in the field	categorical	NA
Trail_Type	Camera set on either - Footpath (hiking trail) / Game Trail / Management track (road) / Old Road (used very rarely) / Private road (used by residents and management).	categorical	NA
Fallow_Land	is camera on a fallow land - yes / no	categorical	NA
Start_date	date that camera was set	dd/mm/yyyy	Continuos
End_date	date that camera was removed	dd/mm/yyyy	Continuos
Height_Ave	Vegetation heigh - averaged for each camera site	meters	Continuos
Cover_Ave_Field	Vegetation cover estimatred in the field	Percentage	0 - 100
Cover_Ave_Photo	vegetation cover estimated from photograph - see cover methods sheet	Percentage	0 - 100
Trail_Type2	Trail typer lumped into game trail (footpath and game trail) and road (all other)	categorical	NA
Elevation_DEM	Digital Elevation Model (DEM) depicting elevation (m) at 90m resolution (Jarvis et al. 2008)	meters above sea level	Continuos
Slope_De	Digital slope model depicting slope (°) at 90m resolution (Jarvis et al. 2008)	degrees	0 - 90 degrees
Remaining datbases are the animal images as well as non animal images for all the sites

## Sheet: Camera_Site_Data
Site_ID	Scenario	Camera_ID	Latitude	Longitude	Slope	Trail_Type	Fallow_Land	Start_date	End_date	Height_Ave	Cover_Ave_Field	Cover_Ave_Photo	Trail_Type2	Elevation_DEM	Slope_De
PB005	Postberg_pre	7	-33.0951	18.0059	flat	management track	0	2016-08-26	2016-09-09	NA	NA	NA	road	13	3.57551
PB007	Postberg_pre	7	-33.0998	18.008	moderate	game trail	0	2016-08-19	2016-08-26	NA	NA	NA	game trail	73	6.80582
PB008	Postberg_pre	7	-33.0955	18.0121	flat	game trail	0	2016-09-09	2016-09-23	NA	NA	NA	game trail	6	1.16265
PB011	Postberg_pre	8	-33.1083	17.9868	gentle	game trail	0	2016-08-25	2016-09-08	NA	NA	NA	game trail	90	4.35665
PB013	Postberg_pre	8	-33.1086	17.9895	flat	game trail	0	2016-08-18	2016-08-25	NA	NA	NA	game trail	87	3.64394
PB015	Postberg_pre	8	-33.1033	17.9907	gentle	game trail	0	2016-09-08	2016-09-22	NA	NA	NA	game trail	49	5.41882
PB016	Postberg_pre	15	-33.1102	17.9989	flat	game trail	0	2016-09-09	2016-09-23	NA	NA	NA	game trail	153	4.33776
PB020	Postberg_pre	7	-33.1056	18.0119	flat	management track	0	2016-09-23	2016-10-07	NA	NA	NA	road	24	6.28918
PB022	Postberg_pre	13	-33.1176	17.9833	gentle	game trail	0	2016-08-25	2016-09-08	NA	NA	NA	game trail	51	1.76136
PB024	Postberg_pre	12	-33.1148	17.987	gentle	game trail	0	2016-09-22	2016-10-06	NA	NA	NA	game trail	73	3.83472
PB025	Postberg_pre	NA	-33.111	17.9902	gentle	game trail	0	2016-08-25	2016-09-08	NA	NA	NA	game trail	93	3.14864
PB028	Postberg_pre	15	-33.1135	18.0028	gentle	private road	0	2016-08-26	2016-09-09	NA	NA	NA	road	141	7.16217
PB029	Postberg_pre	15	-33.1154	18.0052	gentle	game trail	0	2016-09-23	2016-10-07	NA	NA	NA	game trail	124	4.99561
PB033	Postberg_pre	1	-33.1178	18.0069	moderate	game trail	0	2016-08-19	2016-08-26	NA	NA	NA	game trail	102	3.59083
PB035	Postberg_pre	6	-33.1256	17.9776	flat	game trail	1	2016-09-22	2016-10-06	NA	NA	NA	game trail	12	2.83626
PB038	Postberg_pre	6	-33.122	17.9811	gentle	game trail	0	2016-08-18	2016-08-25	NA	NA	NA	game trail	34	2.58506
PB039	Postberg_pre	12	-33.1254	17.9861	flat	game trail	0	2016-09-08	2016-09-22	NA	NA	NA	game trail	44	2.10027
PB042	Postberg_pre	12	-33.1264	17.9913	flat	game trail	0	2016-08-25	2016-09-08	NA	NA	NA	game trail	43	1.66069
PB045	Postberg_pre	15	-33.1238	18.0018	flat	management track	1	2016-08-19	2016-08-26	NA	NA	NA	road	63	1.37458
PB046	Postberg_pre	9	-33.1245	18.0128	moderate	game trail	0	2016-08-26	2016-09-09	NA	NA	NA	game trail	49	12.7234
PB050	Postberg_pre	9	-33.126	18.0249	gentle	management track	0	2016-09-09	2016-09-23	NA	NA	NA	road	9	7.0163
PB054	Postberg_pre	1	-33.1277	18.0298	flat	private road	0	2016-08-26	2016-09-09	NA	NA	NA	road	2	7.45042
PB055	Postberg_pre	12	-33.1313	17.978	flat	game trail	1	2016-08-18	2016-08-25	NA	NA	NA	game trail	10	1.27033
PB056	Postberg_pre	11	-33.1363	17.9755	gentle	game trail	0	2016-09-08	2016-09-22	NA	NA	NA	game trail	43	7.06623
PB059	Postberg_pre	11	-33.1382	17.9818	gentle	footpath	0	2016-09-22	2016-10-06	NA	NA	NA	game trail	52	4.35036
PB063	Postberg_pre	13	-33.1295	17.9904	flat	game trail	0	2016-09-08	2016-09-22	NA	NA	NA	game trail	33	1.73376
PB064	Postberg_pre	13	-33.1325	17.9985	flat	old road	0	2016-09-22	2016-10-06	NA	NA	NA	road	48	1.31303
PB065	Postberg_pre	2	-33.1359	18.0039	flat	old road	0	2016-09-09	2016-09-23	NA	NA	NA	road	36	3.70926
PB067	Postberg_pre	2	-33.1311	18.0123	moderate	game trail	0	2016-08-27	2016-09-09	NA	NA	NA	game trail	78	11.5551
PB069	Postberg_pre	2	-33.134	18.0085	moderate	game trail	0	2016-09-23	2016-10-07	NA	NA	NA	game trail	55	10.2711
PB071	Postberg_pre	9	-33.1307	18.018	gentle	old road	0	2016-09-23	2016-10-07	NA	NA	NA	road	110	6.35574
PB072	Postberg_pre	14	-33.1377	18.0219	flat	private road	0	2016-08-26	2016-09-09	NA	NA	NA	road	10	1.47146
PB074	Postberg_pre	1	-33.1377	18.0249	flat	game trail	0	2016-09-09	2016-09-23	NA	NA	NA	game trail	7	0.714451
PB077	Postberg_pre	11	-33.1416	17.9785	flat	game trail	0	2016-08-25	2016-09-08	NA	NA	NA	game trail	6	3.46634
PB082	Postberg_pre	10	-33.1384	17.9929	flat	game trail	1	2016-09-08	2016-09-22	NA	NA	NA	game trail	22	4.05033
PB083	Postberg_pre	14	-33.1428	17.9963	flat	private road	1	2016-09-23	2016-10-07	NA	NA	NA	road	15	0.262649
PB084	Postberg_pre	10	-33.1435	17.9948	flat	management track	0	2016-08-18	2016-08-25	NA	NA	NA	road	14	0.894485
PB086	Postberg_pre	10	-33.1415	17.9988	moderate	game trail	0	2016-08-25	2016-09-08	NA	NA	NA	game trail	25	7.31885
PB087	Postberg_pre	10	-33.1396	17.9996	gentle	game trail	0	2016-09-22	2016-10-06	NA	NA	NA	game trail	44	3.42048
PB088	Postberg_pre	2	-33.1388	18.0109	flat	management track	1	2016-08-19	2016-08-26	NA	NA	NA	road	10	1.17445
PB089	Postberg_pre	1	-33.1374	18.0142	flat	game trail	1	2016-09-23	2016-10-07	NA	NA	NA	game trail	8	0.469834
PB091	Postberg_pre	14	-33.1409	18.0159	flat	private road	0	2016-09-09	2016-09-23	NA	NA	NA	road	22	2.72244
PB093	Postberg_pre	14	-33.1429	18.0188	gentle	game trail	0	2016-08-19	2016-08-26	NA	NA	NA	game trail	23	1.4947
PB_001	Postberg_postcull	10	-33.1003	18.0033	moderate	management track	0	2017-06-02	2017-07-03	1	0.18	0.18	road	76	10.8114
PB_002	Postberg_postcull	8	-33.1094	17.9943	gentle	game trail	0	2017-06-02	2017-07-03	1.1	0.28	0.24	game trail	106	5.60305
PB_003	Postberg_postcull	12	-33.1093	18.0034	gentle	game trail	1	2017-06-02	2017-07-03	0	0	0	game trail	165	1.64819
PB_004	Postberg_postcull	22	-33.1184	17.9853	gentle	game trail	0	2017-06-02	2017-07-03	1.3	0.38	0.34	game trail	54	2.37704
PB_005	Postberg_postcull	4	-33.1183	17.9943	flat	game trail	0	2017-06-02	2017-07-03	0.7	0.07	0.11	game trail	72	2.45116
PB_006	Postberg_postcull	6	-33.1183	18.0035	flat	game trail	0	2017-06-02	2017-07-03	0.2	0	0	game trail	82	5.77891
PB_007	Postberg_postcull	9	-33.1274	17.9853	moderate	game trail	0	2017-06-01	2017-07-03	1.1	0.44	0.47	game trail	39	2.49016
PB_008	Postberg_postcull	1	-33.1274	17.9945	gentle	game trail	0	2017-06-01	2017-07-03	0.7	0.1	0.09	game trail	49	2.49016
PB_009	Postberg_postcull	7	-33.1273	18.0034	moderate	game trail	0	2017-06-01	2017-07-03	0.4	0	0	game trail	85	12.518
PB_011	Postberg_postcull	13	-33.1273	18.0214	moderate	game trail	0	2017-06-02	2017-07-03	0.9	0.25	0.24	game trail	79	12.9195
PB_012	Postberg_postcull	23	-33.1363	17.9764	moderate	game trail	0	2017-06-01	2017-07-03	0.3	0	0	game trail	60	11.5432
PB_013	Postberg_postcull	14	-33.1364	17.9853	gentle	game trail	1	2017-06-01	2017-07-03	0	0	0	game trail	23	4.14563
PB_014	Postberg_postcull	11	-33.1361	17.9941	gentle	game trail	0	2017-05-31	2017-07-03	1.2	0.17	0.22	game trail	32	2.15528
PB_015	Postberg_postcull	15	-33.1362	18.0032	gentle	game trail	0	2017-05-31	2017-07-03	1.1	0.25	0.28	game trail	38	3.70926
PB_016	Postberg_postcull	25	-33.1364	18.0122	flat	game trail	1	2017-05-31	2017-07-03	0	0	0	game trail	11	2.1166
PB_017	Postberg_postcull	5	-33.1363	18.0213	gentle	game trail	0	2017-05-31	2017-07-03	1.4	0.21	0.28	game trail	11	8.39737
PB_018	Postberg_postcull	3	-33.1452	18.0127	moderate	game trail	0	2017-05-31	2017-07-03	0.4	0.11	0.09	game trail	23	1.31303
BT_001	Bottelery	1	-33.1004	18.1111	flat	game trail	0	2017-07-05	2017-08-07	1.1	0.07	0.07	game trail	62	1.06353
BT_002	Bottelery	22	-33.1096	18.1024	flat	game trail	0	2017-07-05	2017-08-07	0.8	0.14	0.11	game trail	66	1.01033
BT_003	Bottelery	12	-33.1092	18.1109	flat	game trail	0	2017-07-05	2017-08-07	0.6	0.04	0.03	game trail	70	0.587285
BT_004	Bottelery	4	-33.1183	18.0934	gentle	game trail	1	2017-07-05	2017-08-07	0	0	0	game trail	74	4.6792
BT_005	Bottelery	8	-33.1183	18.1022	flat	management track	1	2017-07-05	2017-08-07	0	0	0	road	88	2.11334
BT_006	Bottelery	6	-33.1186	18.1112	flat	game trail	0	2017-07-05	2017-08-07	1.3	0.6	0.49	game trail	98	1.4526
BT_007	Bottelery	14	-33.1273	18.0931	moderate	game trail	0	2017-07-04	2017-08-07	1.3	0.6	0.59	game trail	34	2.78241
BT_008	Bottelery	24	-33.1274	18.1022	gentle	game trail	0	2017-07-05	2017-08-07	0.5	0.04	0.02	game trail	79	3.08024
BT_009	Bottelery	23	-33.1273	18.1112	gentle	game trail	1	2017-07-05	2017-08-07	0	0	0	game trail	103	1.31303
BT_010	Bottelery	10	-33.1275	18.1203	moderate	game trail	0	2017-07-05	2017-08-07	0.8	0.26	0.22	game trail	122	5.39866
BT_011	Bottelery	11	-33.1275	18.1293	gentle	game trail	0	2017-07-05	2017-08-07	0.9	0.34	0.3	game trail	88	3.89856
BT_012	Bottelery	7	-33.1362	18.0842	gentle	game trail	0	2017-07-04	2017-08-07	1.3	0.34	0.32	game trail	9	1.08281
BT_013	Bottelery	9	-33.1363	18.0931	gentle	game trail	0	2017-07-04	2017-08-07	0.9	0.08	0.11	game trail	33	0.968517
BT_014	Bottelery	15	-33.1363	18.1023	gentle	game trail	0	2017-07-04	2017-08-07	1.1	0.35	0.29	game trail	65	1.89332
BT_015	Bottelery	25	-33.1363	18.1112	moderate	game trail	0	2017-07-04	2017-08-07	1.1	0.24	0.22	game trail	78	5.13843
BT_016	Bottelery	3	-33.1363	18.1203	gentle	management track	0	2017-07-04	2017-08-07	1.1	0.25	0.24	road	52	1.94358
BT_017	Bottelery	5	-33.1364	18.1293	moderate	game trail	0	2017-07-04	2017-08-07	1.2	0.28	0.3	game trail	65	3.65335
BT_018	Bottelery	13	-33.1453	18.1202	gentle	game trail	0	2017-07-04	2017-08-07	0.5	0.01	0.01	game trail	64	3.68327
LB_001	Lamberts_bay	5	-32.04	18.3216	gentle	game trail	0	2017-08-09	2017-10-16	1.1	0.26	0.23	game trail	48	2.58239
LB_002	Lamberts_bay	11	-32.0401	18.331	gentle	management track	0	2017-08-09	2017-10-15	0.5	0.05	0.05	road	67	2.70978
LB_003	Lamberts_bay	3	-32.049	18.3215	gentle	game trail	0	2017-08-09	2017-10-16	1	0.12	0.12	game trail	26	1.06353
LB_004	Lamberts_bay	15	-32.0491	18.3304	gentle	game trail	0	2017-08-09	2017-10-15	1.1	0.27	0.27	game trail	43	1.42868
LB_005	Lamberts_bay	26	-32.0492	18.3395	gentle	management track	0	2017-08-10	2017-10-16	0.6	0.07	0.04	road	62	3.07131
LB_006	Lamberts_bay	6	-32.0491	18.3482	gentle	game trail	0	2017-08-10	2017-10-16	1.1	0.1	0.09	game trail	95	3.78975
LB_007	Lamberts_bay	7	-32.0581	18.3215	gentle	game trail	0	2017-08-09	2017-10-15	1.1	0.16	0.18	game trail	22	1.99258
LB_008	Lamberts_bay	8	-32.058	18.3303	moderate	game trail	0	2017-08-09	2017-10-15	0.8	0.09	0.08	game trail	37	2.34791
LB_009	Lamberts_bay	9	-32.0581	18.3393	gentle	game trail	0	2017-08-09	2017-10-15	1.1	0.26	0.24	game trail	44	2.63775
LB_010	Lamberts_bay	10	-32.0582	18.3481	gentle	game trail	0	2017-08-09	2017-10-15	1.1	0.18	0.18	game trail	81	4.27896
LB_011	Lamberts_bay	4	-32.067	18.3213	gentle	game trail	0	2017-08-08	2017-10-15	1	0.04	0.03	game trail	22	1.27033
LB_012	Lamberts_bay	12	-32.0671	18.3304	moderate	game trail	0	2017-08-09	2017-10-15	1	0.11	0.11	game trail	22	2.25519
LB_013	Lamberts_bay	13	-32.0672	18.3386	flat	management track	0	2017-08-09	2017-10-15	1.2	0.55	12	road	19	1.33902
LB_014	Lamberts_bay	24	-32.0672	18.3481	gentle	game trail	0	2017-08-09	2017-10-15	1	0.24	0.25	game trail	62	3.46634
LB_015	Lamberts_bay	1	-32.0761	18.3214	gentle	game trail	0	2017-08-08	2017-10-15	1.2	0.18	0.19	game trail	18	0.117461
LB_016	Lamberts_bay	22	-32.0761	18.3302	gentle	game trail	0	2017-08-08	2017-10-15	1.4	0.38	0.39	game trail	19	0.498333
LB_017	Lamberts_bay	14	-32.0761	18.3391	flat	game trail	0	2017-08-08	2017-10-15	0.9	0.22	0.21	game trail	25	0.484293
LB_018	Lamberts_bay	25	-32.0762	18.3479	gentle	game trail	0	2017-08-08	2017-10-15	1.2	0.39	0.38	game trail	39	3.59847
BF	Other_sites_2016	15	-33.2636	18.1726	flat	management track	NA	2016-10-07	2016-11-02	NA	NA	NA	road	40	1.24843
BS	Other_sites_2016	1	-33.2361	18.1259	gentle	footpath	NA	2016-10-07	2017-01-31	NA	NA	NA	road	25	3.0601
BT	Other_sites_2016	7	-33.1463	18.0977	flat	management track	NA	2016-10-08	2017-02-14	NA	NA	NA	road	5	2.78241
DP	Other_sites_2016	4	-33.1864	18.1424	gentle	management track	NA	2016-09-18	2016-11-27	NA	NA	NA	road	26	1.57551
LH	Other_sites_2016	9	-33.2215	18.1698	flat	management track	NA	2016-10-07	2017-02-14	NA	NA	NA	road	99	1.41413
NND	Other_sites_2016	2	-33.1587	18.0396	moderate	management track	NA	2016-10-08	2017-02-19	NA	NA	NA	road	29	1.66896
SP	Other_sites_2016	5	-33.0947	18.11	flat	management track	NA	2016-09-16	2016-11-29	NA	NA	NA	road	59	0.498333
WCG	Other_sites_2016	14	-33.2437	18.2031	gentle	management track	NA	2016-10-09	2017-01-22	NA	NA	NA	road	84	4.01122
WRS	Other_sites_2016	8	-33.1806	18.0703	gentle	private road	NA	2016-10-07	2016-11-28	NA	NA	NA	road	20	4.91845
WRW	Other_sites_2016	12	-33.215	18.1106	flat	management track	NA	2016-11-28	2017-02-19	NA	NA	NA	road	1	0.598915
WRW_1	Other_sites_2016	12	-33.215	18.1106	flat	management track	NA	2016-10-06	2016-11-02	NA	NA	NA	road	1	0.598915
LBN02	Bottelary_Pre	2	-33.1217	18.1064	NA	game trail	NA	2016-07-08	2016-07-27	NA	NA	NA	NA	NA	NA
LBN03	Bottelary_Pre	2	-33.1216	18.0749	NA	NA	NA	2016-07-27	2016-08-12	NA	NA	NA	NA	NA	NA
PB01	Postberg_pre	1	-33.1047	17.9929	NA	NA	NA	2016-06-10	2016-06-24	NA	NA	NA	NA	NA	NA
PB02	Postberg_pre	1	-33.1368	17.9723	NA	NA	NA	2016-06-24	2016-07-08	NA	NA	NA	NA	NA	NA
PB03	Postberg_pre	1	-33.1336	18.0116	NA	NA	NA	2016-07-08	2016-07-27	NA	NA	NA	NA	NA	NA
PB04	Postberg_pre	1	-33.0974	18.0077	NA	NA	NA	2016-08-01	2016-08-12	NA	NA	NA	NA	NA	NA
PB05	Postberg_pre	2	-33.1294	17.9837	NA	NA	NA	2016-08-12	2016-08-18	NA	NA	NA	NA	NA	NA
PB06	Postberg_pre	1	-33.1308	18.0191	NA	NA	NA	2016-08-12	2016-08-18	NA	NA	NA	NA	NA	NA
SB01	Bottelary_Pre	2	-33.1363	18.0746	NA	NA	NA	2016-06-24	2016-07-08	NA	NA	NA	NA	NA	NA
BT	Bottelary_Pre	7	-33.1463	18.0977	NA	NA	NA	2016-10-08	2017-02-14	NA	NA	NA	NA	NA	NA
DP	Bottelary_Pre	4	-33.1864	18.1424	NA	NA	NA	2016-09-18	2016-11-27	NA	NA	NA	NA	NA	NA
LH	Bottelary_Pre	9	-33.2215	18.1698	NA	NA	NA	2016-10-07	2017-02-14	NA	NA	NA	NA	NA	NA
SP	Bottelary_Pre	5	-33.0947	18.11	NA	NA	NA	2016-09-16	2016-11-29	NA	NA	NA	NA	NA	NA
WCG	Bottelary_Pre	14	-33.2437	18.2031	NA	NA	NA	2016-10-09	2017-01-22	NA	NA	NA	NA	NA	NA

## Sheet: Veg_Height&Cover_Measurements
Location													Vegetation_Height (m)								Vegetation_Cover
Location_ID	Camera_ID	Photo_Number	WP_Number	Lattitude	Longitude	Elevation	Slope	Trail_Type	Date_Set	Time_Set	Date_Collected	Notes	North_1	North_2	East_1	East_2	South_1	South_2	West_1	West_2	North_1_Field	North_1_Photo	North_1_Number	North_2_Field	North_2_Photo	North_2_Number	East_1_Field	East_1_Photo	East_1_Number	East_2_Field	East_2_Photo	East_2_Number	South_1_Field	South_1_Photo	South_1_Number	South_2_Field	South_2_Photo	South_2_Number	West_1_Field	West_1_Photo	West_1_Number	West_2_Field	West_2_Photo	West_2_Number
PB_001	10	IMG_20170602_144449.jpg	WP175	-33.1003	18.0033	84m	Moderate	Management track	2017-06-02	14:45:00	2017-07-03	Camera_ID not in photo	1.5	0.48	1.44	1.2	1.1	0.14	0.75	1.44	0.3016	0.2912	IMG_20170602_143713.jpg	0	0	NA	0.2496	0.3744	IMG_20170602_144059.jpg	0.4368	0.4056	IMG_20170602_144259.jpg	0	0	NA	0	0	NA	0.26	0.2496	IMG_20170602_143259.jpg	0.1976	0.0936	IMG_20170602_143356.jpg
PB_002	8	IMG_20170602_131415.jpg	WP173	-33.1094	17.9943	111m	Gentle	Game trail	2017-06-02	13:14:00	2017-07-03	Time not in photo; Wrong Location_ID in photo; Lots of euphorbia	1.5	1.42	1.4	0.8	0.6	1.47	0.6	0.75	0.1248	0.0832	IMG_20170602_132630.jpg	0.9048	0.8528	IMG_20170602_132721.jpg	0.0208	0.0104	IMG_20170602_132015.jpg	0.0208	0.0104	IMG_20170602_132247.jpg	0	0	NA	0.9468	0.8528	IMG_20170602_131325.jpg	0.2393	0.1248	IMG_20170602_131706.jpg	0	0	NA
PB_003	12	IMG_20170602_135904.jpg	WP174	-33.1093	18.0034	168m	Gentle	Game trail	2017-06-02	14:58:00	2017-07-03	Edge of fallow land but more vegetated than others	0	0	0	0	0	0	0	0	0	0	0	0	0	0	0	0	0	0	0	0	0	0	0	0	0	0	0	0	0	0	0	0
PB_004	22	IMG_20170602_123612.jpg	WP172	-33.1184	17.9853	57m	Gentle	Game trail	2017-06-02	12:35:00	2017-07-03	Lots of restios	1.7	0.7	1.7	2.1	1.55	1.1	0.76	0.74	0.9048	0.8944	IMG_20170602_122746.jpg	0.0104	0.0104	IMG_20170602_122930	0.2704	0.1976	IMG_20170602_123219.jpg	0.9048	0.9464	IMG_20170602_123410.jpg	0.156	0.1352	IMG_20170602_123814.jpg	0.7592	0.5616	IMG_20170602_124002.jpg	0	0	NA	0	0	NA
PB_005	4	IMG_20170602_114530.jpg	WP171	-33.1183	17.9943	72m	Flat	Game trail	2017-06-02	11:45:00	2017-07-03	Lots of restios	0.21	0.6	1.16	0.85	0.33	1.18	1.46	0.17	0.104	0.354	IMG_20170602_114521.jpg	0	0	NA	0.052	0.0624	IMG_20170602_114954.jpg	0	0	NA	0	0	NA	0.104	0.1144	IMG_20170602_113615.jpg	0.3016	0.3224	IMG_20170602_114037.jpg	0	0	NA
PB_006	6	IMG_20170602_110528.jpg	WP170	-33.1183	18.0035	79m	Flat	Game trail	2017-06-02	11:05:00	2017-07-03	Edge of fallow land	0.2	0.52	0	0.11	0	0.27	0	0.71	0	0	NA	0	0	NA	0	0	NA	0	0	NA	0	0	NA	0	0	NA	0	0	NA	0	0	NA
PB_007	9	IMG_20170601_111156_HDR.jpg	WP162	-33.1274	17.9853	35m	Moderate	Game trail	2017-06-01	11:10:00	2017-07-03	Camera_ID not in photo	1.4	1.5	0.15	1.2	0.3	0.6	1.9	1.9	0.6032	0.7176	IMG_20170601_110543_HDR.jpg	0.6032	0.6344	IMG_20170601_110715_HDR.jpg	0	0	NA	0.0728	0.0728	IMG_20170601_110159_HDR.jpg	0	0	NA	0.7072	0.7696	IMG_20170601_105702_HDR.jpg	0.7488	0.7696	IMG_20170601_111120_HDR.jpg	0.8008	0.78	IMG_20170601_111236_HDR.jpg
PB_008	1	IMG_20170601_115538_HDR.jpg	WP163	-33.1274	17.9945	47m	Gentle	Game trail	2017-06-01	11:55:00	2017-07-03	Time and slope wrong in photo	1.3	1.4	0.36	1.3	0.23	0.3	0.12	0.22	0.1976	0.1976	IMG_20170601_114454_HDR.jpg	0.3432	0.2808	IMG_20170601_115036_HDR.jpg	0	0	NA	0.2392	0.208	IMG_20170601_115434_HDR.jpg	0	0	NA	0	0	NA	0	0	NA	0	0	NA
PB_009	7	IMG_20170601_124336_HDR.jpg	WP165	-33.1273	18.0034	85m	Moderate	Game trail	2017-06-01	12:44:00	2017-07-03		0	0.15	0.6	0	0.7	0	0.85	0.96	0	0	NA	0	0	NA	0	0	NA	0	0	NA	0	0	NA	0	0	NA	0	0	NA	0	0	NA
PB_010	24	IMG_20170602_091942.jpg	WP166	-33.1273	18.0123	94m	Gentle	Game trail	2017-06-02	09:20:00	2017-07-03	Rocky outcrop	0.32	0.58	0.1	0.9	0.37	0.36	0.5	0.4	0	0	NA	0	0	NA	0	0	NA	0.3848	0.1768	IMG_20170602_091813	0	0	NA	0	0	NA	0	0	NA	0	0	NA
PB_011	13	IMG_20170602_100607.jpg	WP167	-33.1273	18.0214	72m	Moderate	Game trail	2017-06-02	10:04:00	2017-07-03		2	1	0.9	0.25	0.42	0.71	0.68	1.06	0.9464	0.9464	IMG_20170602_101204.jpg	0.0728	0.0832	IMG_20170602_101328.jpg	0.4994	0.4472	IMG_20170602_100833.jpg	0	0	NA	0	0	NA	0.312	0.26	IMG_20170602_095846.jpg	0	0	NA	0.1352	0.1976	IMG_20170602_100410.jpg
PB_012	23	IMG_20170601_101907_HDR.jpg	WP161	-33.1363	17.9764	34m	Moderate	Game trail	2017-06-01	10:20:00	2017-07-03	Rocky outcrop; Lots of succulents	0.15	0.2	0.6	0.6	0.1	0.3	0.6	0.15	0	0	NA	0	0	NA	0	0	NA	0	0	NA	0	0	NA	0	0	NA	0	0	NA	0	0	NA
PB_013	14	IMG_20170601_092842_HDR.jpg	WP160	-33.1364	17.9853	14m	Gentle	Game trail	2017-06-01	09:28:00	2017-07-03	Fallow land	0	0	0	0	0	0	0	0	0	0	0	0	0	0	0	0	0	0	0	0	0	0	0	0	0	0	0	0	0	0	0	0
PB_014	11	IMG_20170531_155131_HDR.jpg	WP159	-33.1361	17.9941	22m	Gentle	Game trail	2017-05-31	15:48:00	2017-07-03		1.6	1.4	1.6	0.5	0	1.8	1.6	1.4	0.5096	0.7592	IMG_20170531_160651_HDR.jpg	0.4368	0.5096	IMG_20170531_160906_HDR.jpg	0	0	NA	0	0	NA	0	0	NA	0.3848	0.4576	IMG_20170531_155728_HDR.jpg	0	0	NA	0	0	NA
PB_015	15	IMG_20170531_1444836_HDR.jpg	WP158	-33.1362	18.0032	23m	Gentle	Game trail	2017-05-31	14:48:00	2017-07-03		1.7	1.5	1.5	1.9	0	0.75	0.6	1	0.3328	0.1976	IMG_20170531_150651_HDR.jpg	0.7592	0.7904	IMG_20170531_151021_HDR.jpg	0	0	NA	0	0	NA	0	0	NA	0.208	0.3016	IMG_20170531_144536_HDR.jpg	0.1664	0.154	IMG_20170531_145919_HDR.jpg	0.4992	0.78	IMG_20170531_150339_HDR.jpg
PB_016	25	IMG_20170531_134751_HDR.jpg	WP157	-33.1364	18.0122	(-11m)	Flat	Game trail	2017-05-31	13:43:00	2017-07-03	Fallow land	0	0	0	0	0	0	0	0	0	0	0	0	0	0	0	0	0	0	0	0	0	0	0	0	0	0	0	0	0	0	0	0
PB_017	5	IMG_20170531_125339_HDR.jpg	WP156	-33.1363	18.0213	(-27m)	Gentle	Game trail	2017-05-31	12:53:00	2017-07-03	High animal activity; Very dry	1.7	0.8	2	1.9	2.1	0.9	0.8	1	0.3952	0.6448	IMG_20170531_130601_HDR.jpg	0	0	NA	0.7592	0.7696	IMG_20170531_131623_HDR.jpg	0.3536	0.5096	IMG_20170531_131923_HDR.jpg	0.1144	0.1768	IMG_20170531_125920_HDR.jpg	0.0104	0.0208	IMG_20170531_130046_HDR.jpg	0	0	NA	0.052	0.0832	IMG_20170531_130241_HDR.jpg
PB_018	3	IMG_20170531_114822.jpg	WP155	-32.1452	18.0127	(-35m)	Moderate	Game trail	2017-05-31	11:30:00	2017-07-03	Top of sand dune- very sandy	0.8	0.5	0.2	0.5	0.1	0.1	0	1.1	0.3744	0.2912	IMG_20170531_115524_HDR.jpg	0	0	NA	0	0	NA	0	0	NA	0	0	NA	0	0	NA	0	0	NA	0.4992	0.4368	IMG_20170531_121051_HDR.jpg
BT_001	1	IMG_20170705_112619.jpg	WP189	-33.1004	18.1111	56m	Flat	Game trail	2017-07-05	11:25:00	2017-08-07	Large restio component	1.2	1.4	0.5	0.7	0.65	0.75	1.75	1.55	0.208	0.2184	IMG_20170705_112400_HDR.jpg	0.155	0.0728	IMG_20170705_112514_HDR.jpg	0	0	NA	0	0	NA	0	0	NA	0.0416	0.0416	IMG_20170705_112158_HDR.jpg	0.156	0.1872	IMG_20170705_111951_HDR.jpg	0	0	NA
BT_002	22	IMG_20170705_120421.jpg	WP190	-33.1096	18.1024	63m	Flat	Game trail	2017-07-05	12:04:00	2017-08-07	Large restio component	1.5	0.6	0.55	0.5	0.7	1.4	0.4	0.7	0.7072	0.5512	IMG_20170705_120025_HDR.jpg	0	0	NA	0.0104	0.0208	IMG_20170705_115606_HDR.jpg	0	0	NA	0	0	NA	0.4056	0.3224	IMG_20170705_120326	0	0	NA	0	0	NA
BT_003	12	IMG_20170705_124051.jpg	WP191	-33.1092	18.1109	66m	Flat	Game trail	2017-07-05	12:41:00	2017-08-07	Phylica dominant species	1.65	0.85	0.4	0.45	0.5	0.25	0.6	0.35	0.156	0.0728	IMG_20170705_123513.jpg	0.156	0.1872	IMG_20170705_123630.jpg	0	0	NA	0	0	NA	0	0	NA	0	0	NA	0	0	NA	0	0	NA
BT_004	4	IMG_20170705_141034.jpg	WP195	-33.1183	18.0934	75m	Gentle	Game trail	2017-07-05	14:10:00	2017-08-07	Fallow land	0	0	0	0	0	0	0	0	0	0	0	0	0	0	0	0	0	0	0	0	0	0	0	0	0	0	0	0	0	0	0	0
BT_005	8	IMG_20170705_134756.jpg	WP193	-33.1183	18.1022	81m	Flat	Management track	2017-07-05	13:47:00	2017-08-07	Fallow land	0	0	0	0	0	0	0	0	0	0	0	0	0	0	0	0	0	0	0	0	0	0	0	0	0	0	0	0	0	0	0	0
BT_006	6	IMG_20170705_133305.jpg	WP192	-33.1186	18.1112	100m	Flat	Game trail	2017-07-05	13:32:00	2017-08-07	Glare for W2 is cover	1.15	1	1.3	1.5	1.2	1.1	1.4	1.5	0.5512	0	IMG_20170705_132558_HDR.jpg	0.6032	0.5616	IMG_20170705_132450_HDR.jpg	0.8008	0.7176	IMG_20170705_132738_HDR.jpg	0.7072	0.6968	IMG_20170705_132839_HDR.jpg	0.155	0.1456	IMG_20170705_132928_HDR.jpg	0.8008	0.7072	IMG_20170705_133020_HDR.jpg	0.7072	0.6968	IMG_20170705_133121_HDR.jpg	0.4576	0.3952	IMG_20170705_133231_HDR.jpg
BT_007	14	IMG_20170704_142723_HDR.jpg	WP184	-33.1273	18.0931	31m	Moderate	Game trail	2017-07-04	14:27:00	2017-08-07	Quite dense vegetation; Large restio component	1.3	1.4	1.6	1.6	0.4	1.56	1.6	1.15	0.7072	0.7592	IMG_20170704_142445_HDR.jpg	0.4994	0.4264	IMG_20170704_142629_HDR.jpg	0.7592	0.7696	IMG_20170704_141934_HDR.jpg	0.5512	0.4992	IMG_20170704_142140_HDR.jpg	0.1456	0.2496	IMG_20170704_141214_HDR.jpg	0.9464	0.8944	IMG_20170704_141344_HDR.jpg	0.9048	0.8642	IMG_20170704_141520_HDR.jpg	0.2496	0.2808	IMG_20170704_141703_HDR.jpg
BT_008	24	IMG_20170705_083832.jpg	WP185	-33.1274	18.1022	72m	Gentle	Game trail	2017-07-05	08:38:00	2017-08-07	Large restio component	0.25	1.3	0.35	0.35	0.15	0.25	0	1.1	0	0	NA	0.3016	0.1248	IMG_20170705_083740_HDR.jpg	0	0	NA	0	0	NA	0	0	NA	0	0	NA	0	0	NA	0.0208	Not visible in photo	IMG_20170705_083314_HDR.jpg
BT_009	23	IMG_20170705_091351_HDR.jpg	WP186	-33.1273	18.1112	98m	Gentle	Game trail	2017-07-05	09:19:00	2017-08-07	Fallow land	0	0	0	0	0	0	0	0	0	0	0	0	0	0	0	0	0	0	0	0	0	0	0	0	0	0	0	0	0	0	0	0
BT_010	10	IMG_20170705_095124.jpg	WP187	-33.1275	18.1203	121m	Moderate	Game trail	2017-07-05	09:51:00	2017-08-07	Unknown sound (possibly leopard)	1.15	1.2	0.85	0.8	0	0.7	1	0.9	0.8008	0.7488	IMG_20170705_094928_HDR.jpg	0	0	NA	0.2912	0.208	IMG_20170705_094415_HDR.jpg	0.155	0.1352	IMG_20170705_094435_HDR.jpg	0	0	NA	0	0	NA	0.7488	0.5928	IMG_20170705_094609_HDR.jpg	0.104	0.0728	IMG_20170705_094804_HDR.jpg
BT_011	11	IMG_20170705_103039.jpg	WP188	-33.1275	18.1293	71m	Gentle	Game trail	2017-07-05	10:28:00	2017-08-07	Large restio component	0.85	0.95	0.9	0.65	0.7	1.3	0.8	1	0.208	0.1354	IMG_20170705_102817_HDR.jpg	0.5512	0.5408	IMG_20170705_102917_HDR.jpg	0.5096	0.5616	IMG_20170705_101847_HDR.jpg	0.155	0.0728	IMG_20170705_102121_HDR.jpg	0.5096	0.4368	IMG_20170705_102511_HDR.jpg	0.3016	0.3328	IMG_20170705_102641_HDR.jpg	0.1768	0.0832	IMG_20170705_102229_HDR.jpg	0.3016	0.2184	IMG_20170705_102403_HDR.jpg
BT_012	7	IMG_20170704_133917.jpg	WP183	-33.1362	18.0842	7m	Gentle	Game trail	2017-07-04	13:38:00	2017-08-07	Large restio component; Glare for E1 is cover	1.5	1.2	1.45	1.2	1.1	0.9	1.45	1.45	0.208	0.1352	IMG_20170704_133835_HDR.jpg	0	0	NA	0.9048	0.9048	IMG_20170704_ 133119_HDR.jpg	0.2496	0.2496	IMG_20170704_ 133236_HDR.jpg	0	0	NA	0	0	NA	0.6032	0.572	IMG_20170704_133515 _HDR.jpg	0.7488	0.7072	IMG_20170704_ 133628_HDR.jpg
BT_013	9	IMG_20170704_123650.jpg	WP181	-33.1363	18.0931	25m	Gentle	Game trail	2017-07-04	12:36:00	2017-08-07	Next to road	0.8	0.8	0.9	1.2	0.5	0.9	0.7	1.5	0	0	NA	0.0104	0.0728	IMG_20170704_ 123227_HDR.jpg	0.104	0.1248	IMG_20170704_ 122749_HDR.jpg	0.1248	0.1976	IMG_20170704_122916 _HDR.jpg	0	0	NA	0.0832	0.1144	IMG_20170704_ 122459_HDR.jpg	0.0832	0.0728	IMG_20170704_ 123429_HDR.jpg	0.2496	0.3328	IMG_20170704_ 123542_HDR.jpg
BT_014	15	IMG_20170704_115522.jpg	WP180	-33.1363	18.1023	62m	Gentle	Game trail	2017-07-04	11:55:00	2017-08-07		0.75	1.23	1.22	1.3	1	1	0.87	1.07	0.1004	0.0728	IMG_20170704_ 115101_HDR.jpg	0.4994	0.4264	IMG_20170704_ 114937_HDR.jpg	0.8008	0.676	IMG_20170704_ 115239_HDR.jpg	0.7488	0.4888	IMG_20170704_115427 _HDR.jpg	0	0	NA	0	0	NA	0.0832	0.0208	IMG_20170704_ 114654_HDR.jpg	0.5512	0.6136	IMG_20170704_ 114813_HDR.jpg
BT_015	25	IMG_20170704_110258.jpg	WP179	-33.1363	18.1112	72m	Moderate	Game trail	2017-07-04	11:02:00	2017-08-07		0.9	0.6	1.08	1.1	1.55	1.55	0.2	1.5	0	0	NA	0	0	NA	0.2496	0.1664	IMG_20170704_ 105925_HDR.jpg	0.3536	0.2912	IMG_20170704_ 110034_HDR.jpg	0	0	NA	0.9464	0.884	IMG_20170704_ 105744_HDR.jpg	0	0	NA	0.4056	0.4576	IMG_20170704_105502 _HDR.jpg
BT_016	3	IMG_20170704_102752.jpg	WP178	-33.1363	18.1203	47m	Gentle	Management track	2017-07-04	10:24:00	2017-08-07	Lots of restios	1.5	1.12	1	1.1	1.33	1.2	0	1.33	0.6552	0.5824	IMG_20170704_ 102354_HDR.jpg	0.104	0.104	IMG_20170704_ 102251_HDR.jpg	0.0416	0.052	IMG_20170704_ 102002_HDR.jpg	0.208	0.155	IMG_20170704_102152 _HDR.jpg	0.2496	0.208	IMG_20170704_101634 _HDR.jpg	0.4576	0.4472	IMG_20170704_101743 _HDR.jpg	0	0	NA	0.3016	0.4056	IMG_20170704_ 101416_HDR.jpg
BT_017	5	IMG_20170704_095114.jpg	WP177	-33.1364	18.1293	57m	Moderate	Game trail	2017-07-04	09:50:00	2017-08-07		1.1	1.2	0.9	1.6	1.3	1.4	1.05	1.4	0.4056	0.4576	IMG_20170704_ 094431_HDR.jpg	0.104	0.0624	IMG_20170704_ 094651_HDR.jpg	0.8008	0.7384	IMG_20170704_094916 _HDR.jpg	0.3536	0.3328	IMG_20170704_ 094800_HDR.jpg	0.0832	0.0832	IMG_20170704_093630 _HDR.jpg	0.1976	0.1976	IMG_20170704_ 093350_HDR.jpg	0.1456	0.1976	IMG_20170704_ 094224_HDR.jpg	0.156	Not visible in photo	IMG_20170704_093915 _HDR.jpg
BT_018	13	IMG_20170704_091440.jpg	WP176	-33.1453	18.2102		Gentle	Game trail	2017-07-04	08:19:00	2017-08-07	Large succulent component	0.85	0.47	0.3	0.9	0.21	0.29	0.28	0.3	0.052	0.0416	IMG_20170704_ 083250_HDR.jpg	0	0	NA	0	0	NA	0	0	NA	0	0	NA	0	0	NA	0	0	NA	0	0	NA
LB_001	5	IMG_20170809_150032.jpg	WP118	-32.04	18.3216	46m	Gentle	Game trail	2017-08-09	15:00:00	2017-10-16	East and west along fence	1.1	1.45	1.03	1.63	1.23	1.36	0.4	0.5	0.6448	0.5822	IMG_20170809_145811_HDR.jpg	0.3016	0.2394	IMG_20170809_145933_HDR.jpg	0.3016	0.2392	IMG_20170809_145342_HDR.jpg	0.7488	0.728	IMG_20170809_145453_HDR.jpg	0	0	NA	0.052	0.0624	IMG_20170809_144917_HDR.jpg	0	0	NA	0	0	NA
LB_002	11	IMG_20170809_142648.jpg	WP116	-32.0401	18.331	71m	Gentle	Management track	2017-08-09	14:26:00	2017-10-15	South along fence; West is road	0.5	0.7	0.86	1.16	0.3	0.6	0	0	0	0	NA	0	0	NA	0.2496	0.1664	IMG_20170809_142049.jpg	0.0832	0.0936	IMG_20170809_142201.jpg	0	0	NA	0.104	0.1144	IMG_20170809_142614.jpg	0	0	NA	0	0	NA
LB_003	3	IMG_20170809_130707.jpg	WP111	-32.049	18.3215	31m	Gentle	Game trail	2017-08-09	13:06:00	2017-10-16		1	1.5	0.6	0.77	0.7	0.9	1.43	1.43	0.104	0.1248	IMG_20170809_130229_HDR.jpg	0.2496	0.2496	IMG_20170809_130312_HDR.jpg	0	0	NA	0.0104	0	IMG_20170809_130016_HDR.jpg	0	0	NA	0	0	NA	0.6032	0.5928	IMG_20170809_130536_HDR.jpg	0	0	NA
LB_004	15	IMG_20170809_135730.jpg	WP114	-32.0491	18.3304	41m	Gentle	Game trail	2017-08-09	13:57:00	2017-10-15		1.1	1.2	1.2	1.2	1.5	1.5	0.6	0.86	0.3016	0.3016	IMG_20170809_134930_HDR.jpg	0.104	0.0936	IMG_20170809_135028_HDR.jpg	0.1976	0.1976	IMG_20170809_135331_HDR.jpg	0.3536	0.3848	IMG_20170809_135442_HDR.jpg	0.0416	0.0312	IMG_20170809_134634_HDR.jpg	0.9464	0.9464	IMG_20170809_134745_HDR.jpg	0	0	NA	0.1976	0.208	IMG_20170809_135615_HDR.jpg
LB_005	26	IMG_20170810_091135.jpg	WP122	-32.0492	18.3395	68m	Gentle	Management track	2017-08-10	09:11:00	2017-10-16	South is road	0.97	0.75	0.72	0.85	0	0	0.53	0.85	0.1976	0.0728	IMG_20170810_090356_HDR.jpg	0.1456	0.0624	IMG_20170810_090527_HDR.jpg	0	0	NA	0	0	NA	0	0	NA	0.1976	0.1768	IMG_20170810_090112_HDR.jpg	0	0	NA	0	0	NA
LB_006	6	IMG_20170810_083628.jpg	WP120	-32.0491	18.3482	99m	Gentle	Game trail	2017-08-10	08:36:00	2017-10-16		1.13	1	1.05	0.76	0.5	1.46	1.17	1.33	0	0	NA	0	0	NA	0.1976	0.208	IMG_20170810_083442_HDR.jpg	0	0	NA	0	0	NA	0.3016	0.26	IMG_20170810_082719_HDR.jpg	0.3016	0.2184	IMG_20170810_082904_HDR.jpg	0	0	Na
LB_007	7	IMG_20170809_123154_HDR.jpg	WP110	-32.0581	18.3215	22m	Gentle	Game trail	2017-08-09	12:31:00	2017-10-15		1	0.9	1.6	0.55	0	1.55	1.2	2.1	0.3952	0.3536	IMG_20170809_123030_HDR.jpg	0.1456	0.156	IMG_20170809_123113_HDR.jpg	0.0208	0.0312	IMG_20170809_1222433_HDR.jpg	0	0	NA	0	0	NA	0	0	NA	0.3016	0.4264	IMG_20170809_122714_HDR.jpg	0.3952	0.4368	IMG_20170809_122814_HDR.jpg
LB_008	8	IMG_20170809_114800.jpg	WP107	-32.058	18.3303	11m	Moderate	Game trail	2017-08-09	11:47:00	2017-10-15		1	0.95	0.3	1.2	0.25	0.6	1.28	1	0.4472	0.416	IMG_20170809_114203.jpg	0	0	NA	0	0	NA	0	0	NA	0	0	NA	0	0	NA	0	0	NA	0.2496	0.26	IMG_20170809_114417_HDR.jpg
LB_009	9	IMG_20170809_111525.jpg	WP105	-32.0581	18.3393	46m	Gentle	Game trail	2017-08-09	11:15:00	2017-10-15		0.55	1.52	1.46	1	0.7	1	1.38	0.97	0.0208	0.0208	IMG_20170809_110535_HDR.jpg	0.3016	0.208	IMG_20170809_110629_HDR.jpg	0.2496	0.1872	IMG_20170809_111316_HDR.jpg	0.4992	0.572	IMG_20170809_111432_HDR.jpg	0	0	NA	0	0	NA	0.8008	0.8112	IMG_20170809_110906_HDR.jpg	0.1976	0.0832	IMG_20170809_111008_HDR.jpg
LB_010	10	IMG_20170810_091135.jpg	WP103	-32.0582	18.3481	78m	Gentle	Game trail	2017-08-09	10:33:00	2017-10-15		1.3	1.21	1.37	1.15	1.15	1.15	0	1.32	0	0	NA	0.1456	0.1976	IMG_20170809_102802_HDR.jpg	0	0	NA	0.6032	0.5512	IMG_20170809_103258_HDR.jpg	0.5512	0.6136	IMG_20170809_102207_HDR.jpg	0.1456	0.1144	IMG_20170809_102008_HDR.jpg	0	0	NA	0	0	NA
LB_011	4	IMG_20170808_130642.jpg	WP095	-32.067	18.3213	18m	Gentle	Game trail	2017-08-08	13:06:00	2017-10-15	Was originally LB_007	0.55	0	1.2	1.4	0.9	0.9	1.53	1.53	0	0	NA	0	0	NA	0	0	NA	0.1976	0.1248	IMG_20170808_130140.jpg	0	0	NA	0.104	0.1456	IMG_20170808_125556.jpg	0	0	NA	0	0	NA
LB_012	12	IMG_20170809_082714.jpg	WP097	-32.0671	18.3304	25m	Moderate	Game trail	2017-08-09	08:26:00	2017-10-15	Dune field	1	1.2	1.9	1.9	0	0.6	0.7	1	0.104	0.052	IMG_20170809_082153_HDR.jpg	0.1456	0.1456	IMG_20170809_082240_HDR.jpg	0.4994	0.5824	IMG_20170809_082448_HDR.jpg	0.104	0.0728	IMG_20170809_082626_HDR.jpg	0	0	NA	0	0	NA	0	0	NA	0	0	NA
LB_013	13	IMG_20170809_091716_HDR.jpg	WP099	-32.0672	18.3386	18m	Flat	Management track	2017-08-09	09:16:00	2017-10-15	Electrical station thing so camera placed further away	1.4	1.4	1.42	1.4	1.1	0.66	1.45	0.87	0.6032	0.5096	IMG_20170809_090215_HDR.jpg	0.8008	80.08	IMG_20170809_090416_HDR.jpg	0.6032	0.5928	IMG_20170809_091514_HDR.jpg	0.8008	0.7592	IMG_20170809_091610_HDR.jpg	0	0	NA	0.104	12.48	IMG_20170809_091208_HDR.jpg	0.9048	0.884	IMG_20170809_090742_HDR.jpg	0.6032	0.6864	IMG_20170809_090904_HDR.jpg
LB_014	24	IMG_20170809_095655.jpg	WP101	-32.0672	18.3481	60m	Gentle	Game trail	2017-08-09	09:56:00	2017-10-15		1.5	0.97	1.5	1.51	0	1	0.85	0.85	0.9464	0.9152	IMG_20170809_095432_HDR.jpg	0	0	NA	0.3016	0.4056	IMG_20170809_095025_HDR.jpg	0.6448	0.624	IMG_20170809_095140_HDR.jpg	0	0	NA	0	0	NA	0.052	0.0624	IMG_20170809_094741_HDR.jpg	0	0	NA
LB_015	1	IMG_20170808_121346.jpg	WP093	-32.0761	18.3214	18m	Gentle	Game trail	2017-08-08	12:13:00	2017-10-15	WP092 - Fence in bad condition (Jackel wire very rusted); Was originally LB_011	1.03	1.3	1.4	1.43	1.3	1.3	1.16	0.76	0	0	NA	0.7488	0.832	IMG_20170808_120923_HDR.jpg	0.1976	0.1768	IMG_20170808_121104_HDR.jpg	0.1976	0.1872	IMG_20170808_121216_HDR.jpg	0	0	NA	0.104	0.1872	IMG_20170808_120007_HDR.jpg	0.1976	0.1664	IMG_20170808_120337_HDR.jpg	0	0	NA
LB_016	22	IMG_20170808_113440.jpg	WP090	-32.0761	18.3302	18m	Gentle	Game trail	2017-08-08	11:34:00	2017-10-15	Was originally LB_012	0.98	1.53	1.1	0.67	2	0.97	1.95	1.92	0.1976	0.1976	IMG_20170808_112005_HDR.jpg	0.9048	0.9152	IMG_20170808_112150_HDR.jpg	0	0	NA	0.104	0.0624	IMG_20170808_112453_HDR.jpg	0.052	0.1456	IMG_20170808_112657_HDR.jpg	0.104	0.0936	IMG_20170808_112800_HDR.jpg	0.9464	0.9672	IMG_20170808_113212.jpg	0.7488	0.7072	IMG_20170808_113348.jpg
LB_017	14	IMG_20170808_105734.jpg	WP088	-32.0761	18.3391	26m	Flat	Game trail	2017-08-08	10:57:00	2017-10-15	Was originally LB_013	1.4	0.7	0.77	1.2	1.1	1.1	0.3	0.7	0.1456	0.2184	IMG_20170808_105143_HDR.jpg	0	0	NA	0	0	NA	0.8528	0.8632	IMG_20170808_105546_HDR.jpg	0	0	NA	0.8008	0.574	IMG_20170808_104549_HDR.jpg	0	0	NA	0	0	NA
LB_018	25	IMG_20170808_101346.jpg	WP085	-32.0762	18.3479	38m	Gentle	Game trail	2017-08-08	10:13:00	2017-10-15	Was originally LB_014	0.82	1.86	1	1.3	0.55	1.1	1.6	1.6	0.5512	0.572	IMG_20170808_100111_HDR.jpg	0.8008	0.7592	IMG_20170808_100322_HDR.jpg	0.5512	0.4368	IMG_20170808_100552_HDR.jpg	0.1976	0.1664	IMG_20170808_100711_HDR.jpg	0	0	NA	0.1976	0.1768	IMG_20170808_100849_HDR.jpg	0.0208	0.0624	IMG_20170808_101050_HDR.jpg	0.8008	0.8424	IMG_20170808_101159_HDR.jpg

## Sheet: Setting & Veg Cover description
Camera trap settings
Delay: 30 Seconds
3 Images
No video
Lapse off
Aspect/ Zone: Wide
Size: 20mp
DST mode: Auto
Veg height: Closest medium-strata plant within 1m of point. If there are none a smaller plant is used.
Veg cover: Densiometer is set up at the point and positioned facing the bush (to get the best cover reading)
Getting cover friom the densiometer photos
Make a copy of the image as to leave a clear version of the original.
Using an image editing software (e.g. Paint) draw in the gridlines visible on the densitometer. Divide each of the blocks into 4 equal squares and put a dot in the centre of each smaller block.
If the dot is on vegetation, draw a cross and add one to your count. If there isn’t, leave the block as it is.
These crosses make it easier to count up vegetation blocks and decrease the risk of errors due to losing track of your count.
Step 1:
Step 2:
Step 3:
				.	.	.	.
				.	.	.	.
		.	.	.	.	.	.	.	.
		.	.	.	.	.	.	.	.
.	.	.	.	.	.	.	.	.	.	.	.
.	.	.	.	.	.	.	.	.	.	.	.
.	.	.	.	.	.	.	.	.	.	.	.
.	.	.	.	.	.	.	.	.	.	.	.
		.	.	.	.	.	.	.	.
		.	.	.	.	.	.	.	.
				.	.	.	.
				.	.	.	.
Step 4: (Green representing cover)
				.	.	.	.
				.	.	.	.
		.	.	.	.	.	.	.	.
		.	.	.	.	.	.	.	.
.	.	.	.	.	.	.	.	.	.	.	.
.	.	.	.	.	.	.	.	.	.	.	.
.	.	.	.	.	.	.	.	.	.	.	.
.	.	.	.	.	.	.	.	.	.	.	.
		.	.	.	.	.	.	.	.
		.	.	.	.	.	.	.	.
				.	.	.	.
				.	.	.	.
Count=12
Cover=12x1.04
12.48% Cover

## Sheet: Pre_Cull Animal
File	RelativePath	Folder	Date	Time	ImageQuality	MarkForDeletion	Analyser	Area_code	Sampling_period	Grid_number	Site_ID	Latitude	Longitude	Elevation_m	Camera_ID	Start_date	End_date	Photo_type	Caracal_present	Caracal_number	Behaviour	Prey_species	Other_species	Other_species_count	Species	Count	Habitat_state	Notes	Comments	Slope	Trail_type	Trail_use_intensity	caracal_sex	Oher_spp_sex_age
I_00003a.JPG		PB005_Cam7_26Aug-9Sep_2016	2016-09-02	00:52:24	Ok	FALSE	Debbi	PB	Spring	B6	PB005	-33.0951	18.0059	10	7	2016-08-26	2016-09-09	animal	1	1	moving	NA	NA	0	caracal	1	Natural	NA	NA	Flat	Management track	2	NA	NA
I_00003b.JPG		PB005_Cam7_26Aug-9Sep_2016	2016-09-02	00:52:24	Ok	FALSE	Debbi	PB	Spring	B6	PB005	-33.0951	18.0059	10	7	2016-08-26	2016-09-09	animal	1	1	moving	NA	NA	0	caracal	1	Natural	NA	NA	Flat	Management track	2	NA	NA
I_00010a.JPG		PB005_Cam7_26Aug-9Sep_2016	2016-09-07	20:17:18	Ok	FALSE	Debbi	PB	Spring	B6	PB005	-33.0951	18.0059	10	7	2016-08-26	2016-09-09	animal	0	0	NA	NA	gemsbok	1	gemsbok	1	Natural	NA	NA	Flat	Management track	2	NA	NA
I_00010b.JPG		PB005_Cam7_26Aug-9Sep_2016	2016-09-07	20:17:18	Ok	FALSE	Debbi	PB	Spring	B6	PB005	-33.0951	18.0059	10	7	2016-08-26	2016-09-09	animal	0	0	NA	NA	gemsbok	1	gemsbok	1	Natural	NA	NA	Flat	Management track	2	NA	NA
I_00004a.JPG		PB005_Cam7_26Aug-9Sep_2016	2016-09-02	09:52:12	Ok	FALSE	Debbi	PB	Spring	B6	PB005	-33.0951	18.0059	10	7	2016-08-26	2016-09-09	animal	0	0	NA	NA	guinea fowl	2	guinea fowl	2	Natural	NA	NA	Flat	Management track	2	NA	NA
I_00004b.JPG		PB005_Cam7_26Aug-9Sep_2016	2016-09-02	09:52:12	Ok	FALSE	Debbi	PB	Spring	B6	PB005	-33.0951	18.0059	10	7	2016-08-26	2016-09-09	animal	0	0	NA	NA	guinea fowl	2	guinea fowl	2	Natural	NA	NA	Flat	Management track	2	NA	NA
I_00004c.JPG		PB005_Cam7_26Aug-9Sep_2016	2016-09-02	09:52:12	Ok	FALSE	Debbi	PB	Spring	B6	PB005	-33.0951	18.0059	10	7	2016-08-26	2016-09-09	animal	0	0	NA	NA	guinea fowl	2	guinea fowl	2	Natural	NA	NA	Flat	Management track	2	NA	NA
I_00005a.JPG		PB005_Cam7_26Aug-9Sep_2016	2016-09-02	09:55:46	Ok	FALSE	Debbi	PB	Spring	B6	PB005	-33.0951	18.0059	10	7	2016-08-26	2016-09-09	animal	0	0	NA	NA	guinea fowl	1	guinea fowl	1	Natural	NA	NA	Flat	Management track	2	NA	NA
I_00005b.JPG		PB005_Cam7_26Aug-9Sep_2016	2016-09-02	09:55:46	Ok	FALSE	Debbi	PB	Spring	B6	PB005	-33.0951	18.0059	10	7	2016-08-26	2016-09-09	animal	0	0	NA	NA	guinea fowl	1	guinea fowl	1	Natural	NA	NA	Flat	Management track	2	NA	NA
I_00005c.JPG		PB005_Cam7_26Aug-9Sep_2016	2016-09-02	09:55:46	Ok	FALSE	Debbi	PB	Spring	B6	PB005	-33.0951	18.0059	10	7	2016-08-26	2016-09-09	animal	0	0	NA	NA	guinea fowl	1	guinea fowl	1	Natural	NA	NA	Flat	Management track	2	NA	NA
I_00007a.JPG		PB005_Cam7_26Aug-9Sep_2016	2016-09-02	11:24:15	Ok	FALSE	Debbi	PB	Spring	B6	PB005	-33.0951	18.0059	10	7	2016-08-26	2016-09-09	animal	0	0	NA	NA	guinea fowl	1	guinea fowl	1	Natural	NA	NA	Flat	Management track	2	NA	NA
I_00007b.JPG		PB005_Cam7_26Aug-9Sep_2016	2016-09-02	11:24:15	Ok	FALSE	Debbi	PB	Spring	B6	PB005	-33.0951	18.0059	10	7	2016-08-26	2016-09-09	animal	0	0	NA	NA	guinea fowl	1	guinea fowl	1	Natural	NA	NA	Flat	Management track	2	NA	NA
I_00009b.JPG		PB005_Cam7_26Aug-9Sep_2016	2016-09-07	12:41:26	Ok	FALSE	Debbi	PB	Spring	B6	PB005	-33.0951	18.0059	10	7	2016-08-26	2016-09-09	animal	0	0	NA	NA	guinea fowl	1	guinea fowl	1	Natural	NA	NA	Flat	Management track	2	NA	NA
I_00009c.JPG		PB005_Cam7_26Aug-9Sep_2016	2016-09-07	12:41:26	Ok	FALSE	Debbi	PB	Spring	B6	PB005	-33.0951	18.0059	10	7	2016-08-26	2016-09-09	animal	0	0	NA	NA	guinea fowl	1	guinea fowl	1	Natural	NA	NA	Flat	Management track	2	NA	NA
I_00002a.JPG		PB005_Cam7_26Aug-9Sep_2016	2016-08-29	21:01:50	Ok	FALSE	Debbi	PB	Winter	B6	PB005	-33.0951	18.0059	10	7	2016-08-26	2016-09-09	animal	0	0	NA	NA	porcupine	1	porcupine	1	Natural	NA	NA	Flat	Management track	2	NA	NA
I_00011a.JPG		PB005_Cam7_26Aug-9Sep_2016	2016-09-08	01:46:30	Ok	FALSE	Debbi	PB	Spring	B6	PB005	-33.0951	18.0059	10	7	2016-08-26	2016-09-09	animal	0	0	NA	NA	porcupine	1	porcupine	1	Natural	NA	NA	Flat	Management track	2	NA	NA
I_00001a.JPG		PB005_Cam7_26Aug-9Sep_2016	2016-08-26	12:52:26	Ok	FALSE	Debbi	PB	Winter	B6	PB005	-33.0951	18.0059	10	7	2016-08-26	2016-09-09	animal	0	0	NA	NA	steenbok	2	steenbok	2	Natural	NA	NA	Flat	Management track	2	NA	NA
I_00002a.JPG		PB007_Cam7_19-26Aug_2016	2016-08-21	07:35:42	Ok	FALSE	Debbi	PB	Winter	B7	PB007	-33.0998	18.008	73	7	2016-08-19	2016-08-26	animal	0	0	NA	NA	kudu	1	kudu	1	Natural	NA	NA	Moderate	game trail	0	NA	NA
I_00002b.JPG		PB007_Cam7_19-26Aug_2016	2016-08-21	07:35:42	Ok	FALSE	Debbi	PB	Winter	B7	PB007	-33.0998	18.008	73	7	2016-08-19	2016-08-26	animal	0	0	NA	NA	kudu	1	kudu	1	Natural	NA	NA	Moderate	game trail	0	NA	NA
I_00002c.JPG		PB007_Cam7_19-26Aug_2016	2016-08-21	07:35:42	Ok	FALSE	Debbi	PB	Winter	B7	PB007	-33.0998	18.008	73	7	2016-08-19	2016-08-26	animal	0	0	NA	NA	kudu	1	kudu	1	Natural	NA	NA	Moderate	game trail	0	NA	NA
I_00003a.JPG		PB008_Cam7_9-23Sep_2016	2016-09-13	14:05:54	Ok	FALSE	Debbi	PB	Spring	B7	PB008	-33.0955	18.0121	-2	7	2016-09-09	2016-09-23	animal	0	0	NA	NA	cape cormorant	1	cape cormorant	1	Natural	NA	NA	Flat	game trail	0	NA	NA
I_00003b.JPG		PB008_Cam7_9-23Sep_2016	2016-09-13	14:05:54	Ok	FALSE	Debbi	PB	Spring	B7	PB008	-33.0955	18.0121	-2	7	2016-09-09	2016-09-23	animal	0	0	NA	NA	cape cormorant	1	cape cormorant	1	Natural	NA	NA	Flat	game trail	0	NA	NA
I_00003c.JPG		PB008_Cam7_9-23Sep_2016	2016-09-13	14:05:54	Ok	FALSE	Debbi	PB	Spring	B7	PB008	-33.0955	18.0121	-2	7	2016-09-09	2016-09-23	animal	0	0	NA	NA	cape cormorant	1	cape cormorant	1	Natural	NA	NA	Flat	game trail	0	NA	NA
I_00012a.JPG		PB011_Cam8_25Aug-8Sep_2016	2016-09-04	18:37:38	Ok	FALSE	Debbi	PB	Winter	C4	PB011	-33.1083	17.9868	94	8	2016-08-25	2016-09-08	animal	0	0	NA	NA	bontebok	1	bontebok	1	Natural	NA	NA	Gentle	game trail	0	NA	NA
I_00010b.JPG		PB011_Cam8_25Aug-8Sep_2016	2016-09-02	23:33:19	Ok	FALSE	Debbi	PB	Winter	C4	PB011	-33.1083	17.9868	94	8	2016-08-25	2016-09-08	animal	0	0	NA	NA	honey badger	1	honey badger	1	Natural	NA	NA	Gentle	game trail	0	NA	NA
I_00010a.JPG		PB011_Cam8_25Aug-8Sep_2016	2016-09-02	23:33:19	Ok	FALSE	Debbi	PB	Winter	C4	PB011	-33.1083	17.9868	94	8	2016-08-25	2016-09-08	animal	0	0	NA	NA	honey badger	2	honey badger	2	Natural	NA	NA	Gentle	game trail	0	NA	NA
I_00013a.JPG		PB011_Cam8_25Aug-8Sep_2016	2016-09-05	02:20:14	Ok	FALSE	Debbi	PB	Winter	C4	PB011	-33.1083	17.9868	94	8	2016-08-25	2016-09-08	animal	0	0	NA	NA	honey badger	1	honey badger	1	Natural	NA	NA	Gentle	game trail	0	NA	NA
I_00001a.JPG		PB011_Cam8_25Aug-8Sep_2016	2016-08-25	21:43:50	Ok	FALSE	Debbi	PB	Winter	C4	PB011	-33.1083	17.9868	94	8	2016-08-25	2016-09-08	animal	0	0	NA	NA	porcupine	1	porcupine	1	Natural	NA	NA	Gentle	game trail	0	NA	NA
I_00001c.JPG		PB011_Cam8_25Aug-8Sep_2016	2016-08-25	21:43:50	Ok	FALSE	Debbi	PB	Winter	C4	PB011	-33.1083	17.9868	94	8	2016-08-25	2016-09-08	animal	0	0	NA	NA	porcupine	1	porcupine	1	Natural	NA	NA	Gentle	game trail	0	NA	NA
I_00001b.JPG		PB011_Cam8_25Aug-8Sep_2016	2016-08-25	21:43:50	Ok	FALSE	Debbi	PB	Winter	C4	PB011	-33.1083	17.9868	94	8	2016-08-25	2016-09-08	animal	0	0	NA	NA	porcupine	2	porcupine	2	Natural	NA	NA	Gentle	game trail	0	NA	NA
I_00002a.JPG		PB011_Cam8_25Aug-8Sep_2016	2016-08-25	21:50:42	Ok	FALSE	Debbi	PB	Winter	C4	PB011	-33.1083	17.9868	94	8	2016-08-25	2016-09-08	animal	0	0	NA	NA	porcupine	1	porcupine	1	Natural	NA	NA	Gentle	game trail	0	NA	NA
I_00002b.JPG		PB011_Cam8_25Aug-8Sep_2016	2016-08-25	21:50:42	Ok	FALSE	Debbi	PB	Winter	C4	PB011	-33.1083	17.9868	94	8	2016-08-25	2016-09-08	animal	0	0	NA	NA	porcupine	1	porcupine	1	Natural	NA	NA	Gentle	game trail	0	NA	NA
I_00003b.JPG		PB011_Cam8_25Aug-8Sep_2016	2016-08-25	21:53:58	Ok	FALSE	Debbi	PB	Winter	C4	PB011	-33.1083	17.9868	94	8	2016-08-25	2016-09-08	animal	0	0	NA	NA	porcupine	1	porcupine	1	Natural	NA	NA	Gentle	game trail	0	NA	NA
I_00003c.JPG		PB011_Cam8_25Aug-8Sep_2016	2016-08-25	21:53:58	Ok	FALSE	Debbi	PB	Winter	C4	PB011	-33.1083	17.9868	94	8	2016-08-25	2016-09-08	animal	0	0	NA	NA	porcupine	1	porcupine	1	Natural	NA	NA	Gentle	game trail	0	NA	NA
I_00003a.JPG		PB011_Cam8_25Aug-8Sep_2016	2016-08-25	21:53:58	Ok	FALSE	Debbi	PB	Winter	C4	PB011	-33.1083	17.9868	94	8	2016-08-25	2016-09-08	animal	0	0	NA	NA	porcupine	2	porcupine	2	Natural	NA	NA	Gentle	game trail	0	NA	NA
I_00004a.JPG		PB011_Cam8_25Aug-8Sep_2016	2016-08-25	21:55:02	Ok	FALSE	Debbi	PB	Winter	C4	PB011	-33.1083	17.9868	94	8	2016-08-25	2016-09-08	animal	0	0	NA	NA	porcupine	1	porcupine	1	Natural	NA	NA	Gentle	game trail	0	NA	NA
I_00004b.JPG		PB011_Cam8_25Aug-8Sep_2016	2016-08-25	21:55:02	Ok	FALSE	Debbi	PB	Winter	C4	PB011	-33.1083	17.9868	94	8	2016-08-25	2016-09-08	animal	0	0	NA	NA	porcupine	1	porcupine	1	Natural	NA	NA	Gentle	game trail	0	NA	NA
I_00004c.JPG		PB011_Cam8_25Aug-8Sep_2016	2016-08-25	21:55:02	Ok	FALSE	Debbi	PB	Winter	C4	PB011	-33.1083	17.9868	94	8	2016-08-25	2016-09-08	animal	0	0	NA	NA	porcupine	1	porcupine	1	Natural	NA	NA	Gentle	game trail	0	NA	NA
I_00005a.JPG		PB011_Cam8_25Aug-8Sep_2016	2016-08-25	21:55:42	Ok	FALSE	Debbi	PB	Winter	C4	PB011	-33.1083	17.9868	94	8	2016-08-25	2016-09-08	animal	0	0	NA	NA	porcupine	1	porcupine	1	Natural	NA	NA	Gentle	game trail	0	NA	NA
I_00005b.JPG		PB011_Cam8_25Aug-8Sep_2016	2016-08-25	21:55:42	Ok	FALSE	Debbi	PB	Winter	C4	PB011	-33.1083	17.9868	94	8	2016-08-25	2016-09-08	animal	0	0	NA	NA	porcupine	1	porcupine	1	Natural	NA	NA	Gentle	game trail	0	NA	NA
I_00005c.JPG		PB011_Cam8_25Aug-8Sep_2016	2016-08-25	21:55:42	Ok	FALSE	Debbi	PB	Winter	C4	PB011	-33.1083	17.9868	94	8	2016-08-25	2016-09-08	animal	0	0	NA	NA	porcupine	1	porcupine	1	Natural	NA	NA	Gentle	game trail	0	NA	NA
I_00006a.JPG		PB011_Cam8_25Aug-8Sep_2016	2016-08-25	21:56:26	Ok	FALSE	Debbi	PB	Winter	C4	PB011	-33.1083	17.9868	94	8	2016-08-25	2016-09-08	animal	0	0	NA	NA	porcupine	1	porcupine	1	Natural	NA	NA	Gentle	game trail	0	NA	NA
I_00006b.JPG		PB011_Cam8_25Aug-8Sep_2016	2016-08-25	21:56:26	Ok	FALSE	Debbi	PB	Winter	C4	PB011	-33.1083	17.9868	94	8	2016-08-25	2016-09-08	animal	0	0	NA	NA	porcupine	1	porcupine	1	Natural	NA	NA	Gentle	game trail	0	NA	NA
I_00006c.JPG		PB011_Cam8_25Aug-8Sep_2016	2016-08-25	21:56:26	Ok	FALSE	Debbi	PB	Winter	C4	PB011	-33.1083	17.9868	94	8	2016-08-25	2016-09-08	animal	0	0	NA	NA	porcupine	1	porcupine	1	Natural	NA	NA	Gentle	game trail	0	NA	NA
I_00007a.JPG		PB011_Cam8_25Aug-8Sep_2016	2016-08-25	23:49:50	Ok	FALSE	Debbi	PB	Winter	C4	PB011	-33.1083	17.9868	94	8	2016-08-25	2016-09-08	animal	0	0	NA	NA	porcupine	1	porcupine	1	Natural	NA	NA	Gentle	game trail	0	NA	NA
I_00008a.JPG		PB011_Cam8_25Aug-8Sep_2016	2016-08-26	21:39:34	Ok	FALSE	Debbi	PB	Winter	C4	PB011	-33.1083	17.9868	94	8	2016-08-25	2016-09-08	animal	0	0	NA	NA	porcupine	1	porcupine	1	Natural	NA	NA	Gentle	game trail	0	NA	NA
I_00011a.JPG		PB011_Cam8_25Aug-8Sep_2016	2016-09-03	22:46:19	Ok	FALSE	Debbi	PB	Winter	C4	PB011	-33.1083	17.9868	94	8	2016-08-25	2016-09-08	animal	0	0	NA	NA	porcupine	1	porcupine	1	Natural	NA	NA	Gentle	game trail	0	NA	NA
I_00006a.JPG		PB013_Cam8_18-25Aug_2016	2016-08-22	20:20:18	Ok	FALSE	Debbi	PB	Winter	C5	PB013	-33.1086	17.9895	NA	8	2016-08-18	2016-08-25	animal	0	0	NA	NA	blue wildebeest	1	blue wildebeest	1	Natural	NA	NA	Flat	game trail	0	NA	NA
I_00008a.JPG		PB013_Cam8_18-25Aug_2016	2016-08-24	06:18:26	Ok	FALSE	Debbi	PB	Winter	C5	PB013	-33.1086	17.9895	NA	8	2016-08-18	2016-08-25	animal	0	0	NA	NA	cape mountain zebra	1	cape mountain zebra	1	Natural	NA	NA	Flat	game trail	0	NA	NA
I_00009a.JPG		PB013_Cam8_18-25Aug_2016	2016-08-24	06:18:48	Ok	FALSE	Debbi	PB	Winter	C5	PB013	-33.1086	17.9895	NA	8	2016-08-18	2016-08-25	animal	0	0	NA	NA	cape mountain zebra	1	cape mountain zebra	1	Natural	NA	NA	Flat	game trail	0	NA	NA
I_00002a.JPG		PB013_Cam8_18-25Aug_2016	2016-08-20	12:52:30	Ok	FALSE	Debbi	PB	Winter	C5	PB013	-33.1086	17.9895	NA	8	2016-08-18	2016-08-25	animal	0	0	NA	NA	cape spurfowl	1	cape spurfowl	1	Natural	NA	NA	Flat	game trail	0	NA	NA
I_00002b.JPG		PB013_Cam8_18-25Aug_2016	2016-08-20	12:52:30	Ok	FALSE	Debbi	PB	Winter	C5	PB013	-33.1086	17.9895	NA	8	2016-08-18	2016-08-25	animal	0	0	NA	NA	cape spurfowl	1	cape spurfowl	1	Natural	NA	NA	Flat	game trail	0	NA	NA
I_00002c.JPG		PB013_Cam8_18-25Aug_2016	2016-08-20	12:52:30	Ok	FALSE	Debbi	PB	Winter	C5	PB013	-33.1086	17.9895	NA	8	2016-08-18	2016-08-25	animal	0	0	NA	NA	cape spurfowl	1	cape spurfowl	1	Natural	NA	NA	Flat	game trail	0	NA	NA
I_00001a.JPG		PB013_Cam8_18-25Aug_2016	2016-08-19	13:48:32	Ok	FALSE	Debbi	PB	Winter	C5	PB013	-33.1086	17.9895	NA	8	2016-08-18	2016-08-25	animal	0	0	NA	NA	common duiker	1	common duiker	1	Natural	NA	NA	Flat	game trail	0	NA	NA
I_00001b.JPG		PB013_Cam8_18-25Aug_2016	2016-08-19	13:48:32	Ok	FALSE	Debbi	PB	Winter	C5	PB013	-33.1086	17.9895	NA	8	2016-08-18	2016-08-25	animal	0	0	NA	NA	common duiker	1	common duiker	1	Natural	NA	NA	Flat	game trail	0	NA	NA
I_00001c.JPG		PB013_Cam8_18-25Aug_2016	2016-08-19	13:48:32	Ok	FALSE	Debbi	PB	Winter	C5	PB013	-33.1086	17.9895	NA	8	2016-08-18	2016-08-25	animal	0	0	NA	NA	common duiker	1	common duiker	1	Natural	NA	NA	Flat	game trail	0	NA	NA
I_00007a.JPG		PB013_Cam8_18-25Aug_2016	2016-08-23	19:16:06	Ok	FALSE	Debbi	PB	Winter	C5	PB013	-33.1086	17.9895	NA	8	2016-08-18	2016-08-25	animal	0	0	NA	NA	common duiker	1	common duiker	1	Natural	NA	NA	Flat	game trail	0	NA	NA
I_00007b.JPG		PB013_Cam8_18-25Aug_2016	2016-08-23	19:16:06	Ok	FALSE	Debbi	PB	Winter	C5	PB013	-33.1086	17.9895	NA	8	2016-08-18	2016-08-25	animal	0	0	NA	NA	common duiker	1	common duiker	1	Natural	NA	NA	Flat	game trail	0	NA	NA
I_00007c.JPG		PB013_Cam8_18-25Aug_2016	2016-08-23	19:16:06	Ok	FALSE	Debbi	PB	Winter	C5	PB013	-33.1086	17.9895	NA	8	2016-08-18	2016-08-25	animal	0	0	NA	NA	common duiker	1	common duiker	1	Natural	NA	NA	Flat	game trail	0	NA	NA
I_00005a.JPG		PB013_Cam8_18-25Aug_2016	2016-08-21	23:30:48	Ok	FALSE	Debbi	PB	Winter	C5	PB013	-33.1086	17.9895	NA	8	2016-08-18	2016-08-25	animal	0	0	NA	NA	eland	1	eland	1	Natural	NA	NA	Flat	game trail	0	NA	NA
I_00005b.JPG		PB013_Cam8_18-25Aug_2016	2016-08-21	23:30:48	Ok	FALSE	Debbi	PB	Winter	C5	PB013	-33.1086	17.9895	NA	8	2016-08-18	2016-08-25	animal	0	0	NA	NA	eland	1	eland	1	Natural	NA	NA	Flat	game trail	0	NA	NA
I_00005c.JPG		PB013_Cam8_18-25Aug_2016	2016-08-21	23:30:48	Ok	FALSE	Debbi	PB	Winter	C5	PB013	-33.1086	17.9895	NA	8	2016-08-18	2016-08-25	animal	0	0	NA	NA	eland	1	eland	1	Natural	eland calf	NA	Flat	game trail	0	NA	NA
I_00003a.JPG		PB013_Cam8_18-25Aug_2016	2016-08-20	13:33:34	Ok	FALSE	Debbi	PB	Winter	C5	PB013	-33.1086	17.9895	NA	8	2016-08-18	2016-08-25	animal	0	0	NA	NA	grey-winged francolin	1	grey-winged francolin	1	Natural	NA	NA	Flat	game trail	0	NA	NA
I_00003b.JPG		PB013_Cam8_18-25Aug_2016	2016-08-20	13:33:34	Ok	FALSE	Debbi	PB	Winter	C5	PB013	-33.1086	17.9895	NA	8	2016-08-18	2016-08-25	animal	0	0	NA	NA	grey-winged francolin	1	grey-winged francolin	1	Natural	NA	NA	Flat	game trail	0	NA	NA
I_00004a.JPG		PB013_Cam8_18-25Aug_2016	2016-08-20	14:42:56	Ok	FALSE	Debbi	PB	Winter	C5	PB013	-33.1086	17.9895	NA	8	2016-08-18	2016-08-25	animal	0	0	NA	NA	grey-winged francolin	1	grey-winged francolin	1	Natural	NA	NA	Flat	game trail	0	NA	NA
I_00012a.JPG		PB013_Cam8_18-25Aug_2016	2016-08-25	10:33:44	Ok	FALSE	Debbi	PB	Winter	C5	PB013	-33.1086	17.9895	NA	8	2016-08-18	2016-08-25	animal	0	0	NA	NA	ostrich	1	ostrich	1	Natural	NA	NA	Flat	game trail	0	NA	NA
I_00013a.JPG		PB013_Cam8_18-25Aug_2016	2016-08-25	10:35:28	Ok	FALSE	Debbi	PB	Winter	C5	PB013	-33.1086	17.9895	NA	8	2016-08-18	2016-08-25	animal	0	0	NA	NA	ostrich	1	ostrich	1	Natural	NA	NA	Flat	game trail	0	NA	NA
I_00014a.JPG		PB013_Cam8_18-25Aug_2016	2016-08-25	10:36:14	Ok	FALSE	Debbi	PB	Winter	C5	PB013	-33.1086	17.9895	NA	8	2016-08-18	2016-08-25	animal	0	0	NA	NA	ostrich	1	ostrich	1	Natural	NA	NA	Flat	game trail	0	NA	NA
I_00010a.JPG		PB015_Cam8_8-22Sep_2016	2016-09-19	22:45:18	Ok	FALSE	Debbi	PB	Spring	C5	PB015	-33.1033	17.9907	48	8	2016-09-08	2016-09-22	animal	0	0	NA	NA	african wildcat	1	african wildcat	1	Natural	NA	NA	Gentle	game trail	0	NA	NA
I_00010b.JPG		PB015_Cam8_8-22Sep_2016	2016-09-19	22:45:18	Ok	FALSE	Debbi	PB	Spring	C5	PB015	-33.1033	17.9907	48	8	2016-09-08	2016-09-22	animal	0	0	NA	NA	african wildcat	1	african wildcat	1	Natural	NA	NA	Gentle	game trail	0	NA	NA
I_00010c.JPG		PB015_Cam8_8-22Sep_2016	2016-09-19	22:45:18	Ok	FALSE	Debbi	PB	Spring	C5	PB015	-33.1033	17.9907	48	8	2016-09-08	2016-09-22	animal	0	0	NA	NA	african wildcat	1	african wildcat	1	Natural	NA	NA	Gentle	game trail	0	NA	NA
I_00011a.JPG		PB015_Cam8_8-22Sep_2016	2016-09-19	22:47:14	Ok	FALSE	Debbi	PB	Spring	C5	PB015	-33.1033	17.9907	48	8	2016-09-08	2016-09-22	animal	0	0	NA	NA	african wildcat	1	african wildcat	1	Natural	NA	NA	Gentle	game trail	0	NA	NA
I_00011b.JPG		PB015_Cam8_8-22Sep_2016	2016-09-19	22:47:14	Ok	FALSE	Debbi	PB	Spring	C5	PB015	-33.1033	17.9907	48	8	2016-09-08	2016-09-22	animal	0	0	NA	NA	african wildcat	1	african wildcat	1	Natural	NA	NA	Gentle	game trail	0	NA	NA
I_00011c.JPG		PB015_Cam8_8-22Sep_2016	2016-09-19	22:47:14	Ok	FALSE	Debbi	PB	Spring	C5	PB015	-33.1033	17.9907	48	8	2016-09-08	2016-09-22	animal	0	0	NA	NA	african wildcat	1	african wildcat	1	Natural	NA	NA	Gentle	game trail	0	NA	NA
I_00013a.JPG		PB015_Cam8_8-22Sep_2016	2016-09-19	22:48:46	Ok	FALSE	Debbi	PB	Spring	C5	PB015	-33.1033	17.9907	48	8	2016-09-08	2016-09-22	animal	0	0	NA	NA	african wildcat	1	african wildcat	1	Natural	NA	NA	Gentle	game trail	0	NA	NA
I_00013b.JPG		PB015_Cam8_8-22Sep_2016	2016-09-19	22:48:46	Ok	FALSE	Debbi	PB	Spring	C5	PB015	-33.1033	17.9907	48	8	2016-09-08	2016-09-22	animal	0	0	NA	NA	african wildcat	1	african wildcat	1	Natural	NA	NA	Gentle	game trail	0	NA	NA
I_00013c.JPG		PB015_Cam8_8-22Sep_2016	2016-09-19	22:48:46	Ok	FALSE	Debbi	PB	Spring	C5	PB015	-33.1033	17.9907	48	8	2016-09-08	2016-09-22	animal	0	0	NA	NA	african wildcat	1	african wildcat	1	Natural	NA	NA	Gentle	game trail	0	NA	NA
I_00001a.JPG		PB015_Cam8_8-22Sep_2016	2016-09-11	13:05:17	Ok	FALSE	Debbi	PB	Spring	C5	PB015	-33.1033	17.9907	48	8	2016-09-08	2016-09-22	animal	0	0	NA	NA	gemsbok	1	gemsbok	1	Natural	NA	NA	Gentle	game trail	0	NA	NA
I_00001b.JPG		PB015_Cam8_8-22Sep_2016	2016-09-11	13:05:17	Ok	FALSE	Debbi	PB	Spring	C5	PB015	-33.1033	17.9907	48	8	2016-09-08	2016-09-22	animal	0	0	NA	NA	gemsbok	1	gemsbok	1	Natural	NA	NA	Gentle	game trail	0	NA	NA
I_00003a.JPG		PB015_Cam8_8-22Sep_2016	2016-09-18	18:10:24	Ok	FALSE	Debbi	PB	Spring	C5	PB015	-33.1033	17.9907	48	8	2016-09-08	2016-09-22	animal	0	0	NA	NA	gemsbok	1	gemsbok	1	Natural	NA	NA	Gentle	game trail	0	NA	NA
I_00021a.JPG		PB015_Cam8_8-22Sep_2016	2016-09-21	03:49:20	Ok	FALSE	Debbi	PB	Spring	C5	PB015	-33.1033	17.9907	48	8	2016-09-08	2016-09-22	animal	0	0	NA	NA	gemsbok	1	gemsbok	1	Natural	NA	NA	Gentle	game trail	0	NA	NA
I_00003b.JPG		PB016_Cam15_9-23Sep_2016	2016-09-20	11:28:32	Ok	FALSE	Debbi	PB	Spring	C6	PB016	-33.1102	17.9989	144	15	2016-09-09	2016-09-23	animal	0	0	NA	NA	angulate tortoise	4	angulate tortoise	4	Natural	NA	NA	flat	game trail	0	NA	NA
I_00003c.JPG		PB016_Cam15_9-23Sep_2016	2016-09-20	11:28:32	Ok	FALSE	Debbi	PB	Spring	C6	PB016	-33.1102	17.9989	144	15	2016-09-09	2016-09-23	animal	0	0	NA	NA	angulate tortoise	4	angulate tortoise	4	Natural	NA	NA	flat	game trail	0	NA	NA
I_00004a.JPG		PB016_Cam15_9-23Sep_2016	2016-09-21	11:39:38	Ok	FALSE	Debbi	PB	Spring	C6	PB016	-33.1102	17.9989	144	15	2016-09-09	2016-09-23	animal	0	0	NA	NA	angulate tortoise	2	angulate tortoise	2	Natural	NA	NA	flat	game trail	0	NA	NA
I_00004b.JPG		PB016_Cam15_9-23Sep_2016	2016-09-21	11:39:38	Ok	FALSE	Debbi	PB	Spring	C6	PB016	-33.1102	17.9989	144	15	2016-09-09	2016-09-23	animal	0	0	NA	NA	angulate tortoise	2	angulate tortoise	2	Natural	NA	NA	flat	game trail	0	NA	NA
I_00004c.JPG		PB016_Cam15_9-23Sep_2016	2016-09-21	11:39:38	Ok	FALSE	Debbi	PB	Spring	C6	PB016	-33.1102	17.9989	144	15	2016-09-09	2016-09-23	animal	0	0	NA	NA	angulate tortoise	2	angulate tortoise	2	Natural	NA	NA	flat	game trail	0	NA	NA
I_00005a.JPG		PB016_Cam15_9-23Sep_2016	2016-09-21	12:02:24	Ok	FALSE	Debbi	PB	Spring	C6	PB016	-33.1102	17.9989	144	15	2016-09-09	2016-09-23	animal	0	0	NA	NA	angulate tortoise	1	angulate tortoise	1	Natural	NA	NA	flat	game trail	0	NA	NA
I_00005b.JPG		PB016_Cam15_9-23Sep_2016	2016-09-21	12:02:24	Ok	FALSE	Debbi	PB	Spring	C6	PB016	-33.1102	17.9989	144	15	2016-09-09	2016-09-23	animal	0	0	NA	NA	angulate tortoise	1	angulate tortoise	1	Natural	NA	NA	flat	game trail	0	NA	NA
I_00005c.JPG		PB016_Cam15_9-23Sep_2016	2016-09-21	12:02:24	Ok	FALSE	Debbi	PB	Spring	C6	PB016	-33.1102	17.9989	144	15	2016-09-09	2016-09-23	animal	0	0	NA	NA	angulate tortoise	1	angulate tortoise	1	Natural	NA	NA	flat	game trail	0	NA	NA
I_00006a.JPG		PB016_Cam15_9-23Sep_2016	2016-09-21	14:27:41	Ok	FALSE	Debbi	PB	Spring	C6	PB016	-33.1102	17.9989	144	15	2016-09-09	2016-09-23	animal	0	0	NA	NA	angulate tortoise	1	angulate tortoise	1	Natural	NA	NA	flat	game trail	0	NA	NA
I_00006b.JPG		PB016_Cam15_9-23Sep_2016	2016-09-21	14:27:41	Ok	FALSE	Debbi	PB	Spring	C6	PB016	-33.1102	17.9989	144	15	2016-09-09	2016-09-23	animal	0	0	NA	NA	angulate tortoise	1	angulate tortoise	1	Natural	NA	NA	flat	game trail	0	NA	NA
I_00006c.JPG		PB016_Cam15_9-23Sep_2016	2016-09-21	14:27:41	Ok	FALSE	Debbi	PB	Spring	C6	PB016	-33.1102	17.9989	144	15	2016-09-09	2016-09-23	animal	0	0	NA	NA	angulate tortoise	1	angulate tortoise	1	Natural	NA	NA	flat	game trail	0	NA	NA
I_00001b.JPG		PB016_Cam15_9-23Sep_2016	2016-09-10	04:05:32	Ok	FALSE	Debbi	PB	Spring	C6	PB016	-33.1102	17.9989	144	15	2016-09-09	2016-09-23	animal	0	0	NA	NA	honey badger	1	honey badger	1	Natural	NA	NA	flat	game trail	0	NA	NA
I_00001a.JPG		PB016_Cam15_9-23Sep_2016	2016-09-10	04:05:32	Ok	FALSE	Debbi	PB	Spring	C6	PB016	-33.1102	17.9989	144	15	2016-09-09	2016-09-23	animal	0	0	NA	NA	honey badger	2	honey badger	2	Natural	NA	NA	flat	game trail	0	NA	NA
I_00004a.JPG		PB020_Cam7_23Sep-7Oct_2016	2016-09-23	19:16:28	Ok	FALSE	Mila	PB	Spring	NA	PB020	-33.1056	18.0119	20	7	2016-09-23	2016-10-07	animal	1	1	moving	NA	NA	0	caracal	1	Natural	NA	NA	flat	management track	2	Unknown	NA
I_00021a.JPG		PB020_Cam7_23Sep-7Oct_2016	2016-09-29	07:30:00	Ok	FALSE	Mila	PB	Spring	NA	PB020	-33.1056	18.0119	20	7	2016-09-23	2016-10-07	animal	0	0	NA	NA	common duiker	1	common duiker	1	Natural	NA	NA	flat	management track	2	NA	adult female
I_00013a.JPG		PB020_Cam7_23Sep-7Oct_2016	2016-09-27	06:04:35	Ok	FALSE	Mila	PB	Spring	NA	PB020	-33.1056	18.0119	20	7	2016-09-23	2016-10-07	animal	0	0	NA	NA	eland	1	eland	1	Natural	NA	unknown species	flat	management track	2	NA	NA
I_00013b.JPG		PB020_Cam7_23Sep-7Oct_2016	2016-09-27	06:04:35	Ok	FALSE	Mila	PB	Spring	NA	PB020	-33.1056	18.0119	20	7	2016-09-23	2016-10-07	animal	0	0	NA	NA	eland	1	eland	1	Natural	NA	Unknown species	flat	management track	2	NA	NA
I_00014b.JPG		PB020_Cam7_23Sep-7Oct_2016	2016-09-27	06:44:11	Ok	FALSE	Mila	PB	Spring	NA	PB020	-33.1056	18.0119	20	7	2016-09-23	2016-10-07	animal	0	0	NA	NA	eland	1	eland	1	Natural	NA	NA	flat	management track	2	NA	adult male
I_00014c.JPG		PB020_Cam7_23Sep-7Oct_2016	2016-09-27	06:44:11	Ok	FALSE	Mila	PB	Spring	NA	PB020	-33.1056	18.0119	20	7	2016-09-23	2016-10-07	animal	0	0	NA	NA	eland	1	eland	1	Natural	NA	NA	flat	management track	2	NA	adult male
I_00015a.JPG		PB020_Cam7_23Sep-7Oct_2016	2016-09-27	06:47:26	Ok	FALSE	Mila	PB	Spring	NA	PB020	-33.1056	18.0119	20	7	2016-09-23	2016-10-07	animal	0	0	NA	NA	eland	1	eland	1	Natural	NA	NA	flat	management track	2	NA	adult male
I_00015b.JPG		PB020_Cam7_23Sep-7Oct_2016	2016-09-27	06:47:26	Ok	FALSE	Mila	PB	Spring	NA	PB020	-33.1056	18.0119	20	7	2016-09-23	2016-10-07	animal	0	0	NA	NA	eland	1	eland	1	Natural	NA	NA	flat	management track	2	NA	adult male
I_00035b.JPG		PB020_Cam7_23Sep-7Oct_2016	2016-10-03	19:39:40	Ok	FALSE	Mila	PB	Spring	NA	PB020	-33.1056	18.0119	20	7	2016-09-23	2016-10-07	animal	0	0	NA	NA	eland	1	eland	1	Natural	NA	NA	flat	management track	2	NA	adult male
I_00036a.JPG		PB020_Cam7_23Sep-7Oct_2016	2016-10-04	09:25:54	Ok	FALSE	Mila	PB	Spring	NA	PB020	-33.1056	18.0119	20	7	2016-09-23	2016-10-07	animal	0	0	NA	NA	eland	1	eland	1	Natural	NA	NA	flat	management track	2	NA	adult male
I_00036b.JPG		PB020_Cam7_23Sep-7Oct_2016	2016-10-04	09:25:54	Ok	FALSE	Mila	PB	Spring	NA	PB020	-33.1056	18.0119	20	7	2016-09-23	2016-10-07	animal	0	0	NA	NA	eland	1	eland	1	Natural	NA	NA	flat	management track	2	NA	adult male
I_00029b.JPG		PB020_Cam7_23Sep-7Oct_2016	2016-10-03	06:51:39	Ok	FALSE	Mila	PB	Spring	NA	PB020	-33.1056	18.0119	20	7	2016-09-23	2016-10-07	animal	0	0	NA	NA	kudu	1	kudu	1	Natural	NA	1 A U	flat	management track	2	NA	NA
I_00029a.JPG		PB020_Cam7_23Sep-7Oct_2016	2016-10-03	06:51:39	Ok	FALSE	Mila	PB	Spring	NA	PB020	-33.1056	18.0119	20	7	2016-09-23	2016-10-07	animal	0	0	NA	NA	kudu	1	kudu	1	Natural	NA	1 A U	flat	management track	2	NA	NA
I_00002a.JPG		PB022_Cam13_25Aug-8Sep_2016	2016-08-26	13:37:21	Ok	FALSE	Debbi	PB	Winter	D4	PB022	-33.1176	17.9833	50	13	2016-08-25	2016-09-08	animal	0	0	NA	NA	cape spurfowl	1	cape spurfowl	1	Natural	NA	NA	gentle	game trail	0	NA	NA
I_00002b.JPG		PB022_Cam13_25Aug-8Sep_2016	2016-08-26	13:37:21	Ok	FALSE	Debbi	PB	Winter	D4	PB022	-33.1176	17.9833	50	13	2016-08-25	2016-09-08	animal	0	0	NA	NA	cape spurfowl	1	cape spurfowl	1	Natural	NA	NA	gentle	game trail	0	NA	NA
I_00002c.JPG		PB022_Cam13_25Aug-8Sep_2016	2016-08-26	13:37:21	Ok	FALSE	Debbi	PB	Winter	D4	PB022	-33.1176	17.9833	50	13	2016-08-25	2016-09-08	animal	0	0	NA	NA	cape spurfowl	1	cape spurfowl	1	Natural	NA	NA	gentle	game trail	0	NA	NA
I_00003a.JPG		PB022_Cam13_25Aug-8Sep_2016	2016-08-26	13:37:43	Ok	FALSE	Debbi	PB	Winter	D4	PB022	-33.1176	17.9833	50	13	2016-08-25	2016-09-08	animal	0	0	NA	NA	cape spurfowl	2	cape spurfowl	2	Natural	NA	NA	gentle	game trail	0	NA	NA
I_00003b.JPG		PB022_Cam13_25Aug-8Sep_2016	2016-08-26	13:37:43	Ok	FALSE	Debbi	PB	Winter	D4	PB022	-33.1176	17.9833	50	13	2016-08-25	2016-09-08	animal	0	0	NA	NA	cape spurfowl	2	cape spurfowl	2	Natural	NA	NA	gentle	game trail	0	NA	NA
I_00003c.JPG		PB022_Cam13_25Aug-8Sep_2016	2016-08-26	13:37:43	Ok	FALSE	Debbi	PB	Winter	D4	PB022	-33.1176	17.9833	50	13	2016-08-25	2016-09-08	animal	0	0	NA	NA	cape spurfowl	2	cape spurfowl	2	Natural	NA	NA	gentle	game trail	0	NA	NA
I_00005a.JPG		PB022_Cam13_25Aug-8Sep_2016	2016-09-06	17:39:40	Ok	FALSE	Debbi	PB	Spring	D4	PB022	-33.1176	17.9833	50	13	2016-08-25	2016-09-08	animal	0	0	NA	NA	common duiker	1	common duiker	1	Natural	NA	NA	gentle	game trail	0	NA	NA
I_00005b.JPG		PB022_Cam13_25Aug-8Sep_2016	2016-09-06	17:39:40	Ok	FALSE	Debbi	PB	Spring	D4	PB022	-33.1176	17.9833	50	13	2016-08-25	2016-09-08	animal	0	0	NA	NA	common duiker	1	common duiker	1	Natural	NA	NA	gentle	game trail	0	NA	NA
I_00005c.JPG		PB022_Cam13_25Aug-8Sep_2016	2016-09-06	17:39:40	Ok	FALSE	Debbi	PB	Spring	D4	PB022	-33.1176	17.9833	50	13	2016-08-25	2016-09-08	animal	0	0	NA	NA	common duiker	1	common duiker	1	Natural	NA	NA	gentle	game trail	0	NA	NA
I_00004a.JPG		PB022_Cam13_25Aug-8Sep_2016	2016-09-04	09:16:45	Ok	FALSE	Debbi	PB	Spring	D4	PB022	-33.1176	17.9833	50	13	2016-08-25	2016-09-08	animal	0	0	NA	NA	ostrich	1	ostrich	1	Natural	NA	NA	gentle	game trail	0	NA	NA
I_00023a.JPG		PB024_Cam12_22Sep-6Oct_2016	2016-09-28	12:10:36	Ok	FALSE	Mila	PB	Spring	D4	PB024	-33.1148	17.987	74	12	2016-09-22	2016-10-06	animal	0	0	NA	NA	angulate tortoise	1	angulate tortoise	1	Natural	NA	Age and sex unknown	gentle	game trail	0	NA	NA
I_00023b.JPG		PB024_Cam12_22Sep-6Oct_2016	2016-09-28	12:10:36	Ok	FALSE	Mila	PB	Spring	D4	PB024	-33.1148	17.987	74	12	2016-09-22	2016-10-06	animal	0	0	NA	NA	angulate tortoise	1	angulate tortoise	1	Natural	NA	Age and sex unknown	gentle	game trail	0	NA	NA
I_00023c.JPG		PB024_Cam12_22Sep-6Oct_2016	2016-09-28	12:10:36	Ok	FALSE	Mila	PB	Spring	D4	PB024	-33.1148	17.987	74	12	2016-09-22	2016-10-06	animal	0	0	NA	NA	angulate tortoise	1	angulate tortoise	1	Natural	NA	Age and sex unknown	gentle	game trail	0	NA	NA
I_00068a.JPG		PB024_Cam12_22Sep-6Oct_2016	2016-10-05	12:07:17	Ok	FALSE	Mila	PB	Spring	D4	PB024	-33.1148	17.987	74	12	2016-09-22	2016-10-06	animal	0	0	NA	NA	angulate tortoise	1	angulate tortoise	1	Natural	NA	Age and sex unknown	gentle	game trail	0	NA	NA
I_00068b.JPG		PB024_Cam12_22Sep-6Oct_2016	2016-10-05	12:07:17	Ok	FALSE	Mila	PB	Spring	D4	PB024	-33.1148	17.987	74	12	2016-09-22	2016-10-06	animal	0	0	NA	NA	angulate tortoise	1	angulate tortoise	1	Natural	NA	Age and sex unknown	gentle	game trail	0	NA	NA
I_00068c.JPG		PB024_Cam12_22Sep-6Oct_2016	2016-10-05	12:07:17	Ok	FALSE	Mila	PB	Spring	D4	PB024	-33.1148	17.987	74	12	2016-09-22	2016-10-06	animal	0	0	NA	NA	angulate tortoise	1	angulate tortoise	1	Natural	NA	Age and sex unknown	gentle	game trail	0	NA	NA
I_00069a.JPG		PB024_Cam12_22Sep-6Oct_2016	2016-10-05	12:08:08	Ok	FALSE	Mila	PB	Spring	D4	PB024	-33.1148	17.987	74	12	2016-09-22	2016-10-06	animal	0	0	NA	NA	angulate tortoise	1	angulate tortoise	1	Natural	NA	Age and sex unknown	gentle	game trail	0	NA	NA
I_00069b.JPG		PB024_Cam12_22Sep-6Oct_2016	2016-10-05	12:08:08	Ok	FALSE	Mila	PB	Spring	D4	PB024	-33.1148	17.987	74	12	2016-09-22	2016-10-06	animal	0	0	NA	NA	angulate tortoise	1	angulate tortoise	1	Natural	NA	Age and sex unknown	gentle	game trail	0	NA	NA
I_00069c.JPG		PB024_Cam12_22Sep-6Oct_2016	2016-10-05	12:08:08	Ok	FALSE	Mila	PB	Spring	D4	PB024	-33.1148	17.987	74	12	2016-09-22	2016-10-06	animal	0	0	NA	NA	angulate tortoise	1	angulate tortoise	1	Natural	NA	Age and sex unknown	gentle	game trail	0	NA	NA
I_00072a.JPG		PB024_Cam12_22Sep-6Oct_2016	2016-10-05	12:16:10	Ok	FALSE	Mila	PB	Spring	D4	PB024	-33.1148	17.987	74	12	2016-09-22	2016-10-06	animal	0	0	NA	NA	angulate tortoise	1	angulate tortoise	1	Natural	NA	Age and sex unknown	gentle	game trail	0	NA	NA
I_00072b.JPG		PB024_Cam12_22Sep-6Oct_2016	2016-10-05	12:16:10	Ok	FALSE	Mila	PB	Spring	D4	PB024	-33.1148	17.987	74	12	2016-09-22	2016-10-06	animal	0	0	NA	NA	angulate tortoise	1	angulate tortoise	1	Natural	NA	Age and sex unknown	gentle	game trail	0	NA	NA
I_00072c.JPG		PB024_Cam12_22Sep-6Oct_2016	2016-10-05	12:16:10	Ok	FALSE	Mila	PB	Spring	D4	PB024	-33.1148	17.987	74	12	2016-09-22	2016-10-06	animal	0	0	NA	NA	angulate tortoise	1	angulate tortoise	1	Natural	NA	Age and sex unknown	gentle	game trail	0	NA	NA
I_00062a.JPG		PB024_Cam12_22Sep-6Oct_2016	2016-10-05	08:31:09	Ok	FALSE	Mila	PB	Spring	D4	PB024	-33.1148	17.987	74	12	2016-09-22	2016-10-06	animal	0	0	NA	NA	cape hare	1	cape hare	1	Natural	NA	1 A U	gentle	game trail	0	NA	NA
I_00002a.JPG		PB024_Cam12_22Sep-6Oct_2016	2016-09-27	10:48:07	Ok	FALSE	Mila	PB	Spring	D4	PB024	-33.1148	17.987	74	12	2016-09-22	2016-10-06	animal	0	0	NA	NA	cape spurfowl	1	cape spurfowl	1	Natural	NA	Age and sex unknown	gentle	game trail	0	NA	NA
I_00003a.JPG		PB024_Cam12_22Sep-6Oct_2016	2016-09-27	10:49:23	Ok	FALSE	Mila	PB	Spring	D4	PB024	-33.1148	17.987	74	12	2016-09-22	2016-10-06	animal	0	0	NA	NA	cape spurfowl	1	cape spurfowl	1	Natural	NA	Age and sex unknown	gentle	game trail	0	NA	NA
I_00003b.JPG		PB024_Cam12_22Sep-6Oct_2016	2016-09-27	10:49:23	Ok	FALSE	Mila	PB	Spring	D4	PB024	-33.1148	17.987	74	12	2016-09-22	2016-10-06	animal	0	0	NA	NA	cape spurfowl	1	cape spurfowl	1	Natural	NA	Age and sex unknown	gentle	game trail	0	NA	NA
I_00004a.JPG		PB024_Cam12_22Sep-6Oct_2016	2016-09-27	10:51:39	Ok	FALSE	Mila	PB	Spring	D4	PB024	-33.1148	17.987	74	12	2016-09-22	2016-10-06	animal	0	0	NA	NA	cape spurfowl	1	cape spurfowl	1	Natural	NA	Age and sex unknown	gentle	game trail	0	NA	NA
I_00005a.JPG		PB024_Cam12_22Sep-6Oct_2016	2016-09-27	11:09:18	Ok	FALSE	Mila	PB	Spring	D4	PB024	-33.1148	17.987	74	12	2016-09-22	2016-10-06	animal	0	0	NA	NA	cape spurfowl	1	cape spurfowl	1	Natural	NA	Age and sex unknown	gentle	game trail	0	NA	NA
I_00005b.JPG		PB024_Cam12_22Sep-6Oct_2016	2016-09-27	11:09:18	Ok	FALSE	Mila	PB	Spring	D4	PB024	-33.1148	17.987	74	12	2016-09-22	2016-10-06	animal	0	0	NA	NA	cape spurfowl	1	cape spurfowl	1	Natural	NA	Age and sex unknown	gentle	game trail	0	NA	NA
I_00005c.JPG		PB024_Cam12_22Sep-6Oct_2016	2016-09-27	11:09:18	Ok	FALSE	Mila	PB	Spring	D4	PB024	-33.1148	17.987	74	12	2016-09-22	2016-10-06	animal	0	0	NA	NA	cape spurfowl	1	cape spurfowl	1	Natural	NA	Age and sex unknown	gentle	game trail	0	NA	NA
I_00006a.JPG		PB024_Cam12_22Sep-6Oct_2016	2016-09-27	11:09:42	Ok	FALSE	Mila	PB	Spring	D4	PB024	-33.1148	17.987	74	12	2016-09-22	2016-10-06	animal	0	0	NA	NA	cape spurfowl	1	cape spurfowl	1	Natural	NA	Age and sex unknown	gentle	game trail	0	NA	NA
I_00049a.JPG		PB024_Cam12_22Sep-6Oct_2016	2016-10-01	19:22:45	Ok	FALSE	Mila	PB	Spring	D4	PB024	-33.1148	17.987	74	12	2016-09-22	2016-10-06	animal	0	0	NA	NA	common duiker	1	common duiker	1	Natural	NA	NA	gentle	game trail	0	NA	adult male
I_00049b.JPG		PB024_Cam12_22Sep-6Oct_2016	2016-10-01	19:22:45	Ok	FALSE	Mila	PB	Spring	D4	PB024	-33.1148	17.987	74	12	2016-09-22	2016-10-06	animal	0	0	NA	NA	common duiker	1	common duiker	1	Natural	NA	NA	gentle	game trail	0	NA	adult male
I_00053a.JPG		PB024_Cam12_22Sep-6Oct_2016	2016-10-02	18:40:00	Ok	FALSE	Mila	PB	Spring	D4	PB024	-33.1148	17.987	74	12	2016-09-22	2016-10-06	animal	0	0	NA	NA	common duiker	1	common duiker	1	Natural	NA	NA	gentle	game trail	0	NA	adult male
I_00053b.JPG		PB024_Cam12_22Sep-6Oct_2016	2016-10-02	18:40:00	Ok	FALSE	Mila	PB	Spring	D4	PB024	-33.1148	17.987	74	12	2016-09-22	2016-10-06	animal	0	0	NA	NA	common duiker	1	common duiker	1	Natural	NA	NA	gentle	game trail	0	NA	adult male
I_00053c.JPG		PB024_Cam12_22Sep-6Oct_2016	2016-10-02	18:40:00	Ok	FALSE	Mila	PB	Spring	D4	PB024	-33.1148	17.987	74	12	2016-09-22	2016-10-06	animal	0	0	NA	NA	common duiker	1	common duiker	1	Natural	NA	NA	gentle	game trail	0	NA	adult male
I_00054a.JPG		PB024_Cam12_22Sep-6Oct_2016	2016-10-02	18:45:04	Ok	FALSE	Mila	PB	Spring	D4	PB024	-33.1148	17.987	74	12	2016-09-22	2016-10-06	animal	0	0	NA	NA	common duiker	1	common duiker	1	Natural	NA	NA	gentle	game trail	0	NA	adult male
I_00054b.JPG		PB024_Cam12_22Sep-6Oct_2016	2016-10-02	18:45:04	Ok	FALSE	Mila	PB	Spring	D4	PB024	-33.1148	17.987	74	12	2016-09-22	2016-10-06	animal	0	0	NA	NA	common duiker	1	common duiker	1	Natural	NA	NA	gentle	game trail	0	NA	adult male
I_00054c.JPG		PB024_Cam12_22Sep-6Oct_2016	2016-10-02	18:45:04	Ok	FALSE	Mila	PB	Spring	D4	PB024	-33.1148	17.987	74	12	2016-09-22	2016-10-06	animal	0	0	NA	NA	common duiker	1	common duiker	1	Natural	NA	NA	gentle	game trail	0	NA	adult male
I_00055a.JPG		PB024_Cam12_22Sep-6Oct_2016	2016-10-03	06:25:07	Ok	FALSE	Mila	PB	Spring	D4	PB024	-33.1148	17.987	74	12	2016-09-22	2016-10-06	animal	0	0	NA	NA	common duiker	1	common duiker	1	Natural	NA	NA	gentle	game trail	0	NA	adult male
I_00055b.JPG		PB024_Cam12_22Sep-6Oct_2016	2016-10-03	06:25:07	Ok	FALSE	Mila	PB	Spring	D4	PB024	-33.1148	17.987	74	12	2016-09-22	2016-10-06	animal	0	0	NA	NA	common duiker	1	common duiker	1	Natural	NA	NA	gentle	game trail	0	NA	adult male
I_00055c.JPG		PB024_Cam12_22Sep-6Oct_2016	2016-10-03	06:25:07	Ok	FALSE	Mila	PB	Spring	D4	PB024	-33.1148	17.987	74	12	2016-09-22	2016-10-06	animal	0	0	NA	NA	common duiker	1	common duiker	1	Natural	NA	NA	gentle	game trail	0	NA	adult male
I_00059a.JPG		PB024_Cam12_22Sep-6Oct_2016	2016-10-04	00:05:13	Ok	FALSE	Mila	PB	Spring	D4	PB024	-33.1148	17.987	74	12	2016-09-22	2016-10-06	animal	0	0	NA	NA	common duiker	1	common duiker	1	Natural	NA	1 A U	gentle	game trail	0	NA	NA
I_00061a.JPG		PB024_Cam12_22Sep-6Oct_2016	2016-10-04	07:08:40	Ok	FALSE	Mila	PB	Spring	D4	PB024	-33.1148	17.987	74	12	2016-09-22	2016-10-06	animal	0	0	NA	NA	common duiker	1	common duiker	1	Natural	NA	NA	gentle	game trail	0	NA	adult male
I_00061b.JPG		PB024_Cam12_22Sep-6Oct_2016	2016-10-04	07:08:40	Ok	FALSE	Mila	PB	Spring	D4	PB024	-33.1148	17.987	74	12	2016-09-22	2016-10-06	animal	0	0	NA	NA	common duiker	1	common duiker	1	Natural	NA	NA	gentle	game trail	0	NA	adult male
I_00045a.JPG		PB024_Cam12_22Sep-6Oct_2016	2016-09-29	19:43:54	Ok	FALSE	Mila	PB	Spring	D4	PB024	-33.1148	17.987	74	12	2016-09-22	2016-10-06	animal	0	0	NA	NA	eland	1	eland	1	Natural	NA	Species unknown	gentle	game trail	0	NA	NA
I_00045b.JPG		PB024_Cam12_22Sep-6Oct_2016	2016-09-29	19:43:54	Ok	FALSE	Mila	PB	Spring	D4	PB024	-33.1148	17.987	74	12	2016-09-22	2016-10-06	animal	0	0	NA	NA	eland	1	eland	1	Natural	NA	Species unknown	gentle	game trail	0	NA	NA
I_00045c.JPG		PB024_Cam12_22Sep-6Oct_2016	2016-09-29	19:43:54	Ok	FALSE	Mila	PB	Spring	D4	PB024	-33.1148	17.987	74	12	2016-09-22	2016-10-06	animal	0	0	NA	NA	eland	1	eland	1	Natural	NA	Species unknown	gentle	game trail	0	NA	NA
I_00104a.JPG		PB024_Cam12_22Sep-6Oct_2016	2016-10-06	00:54:08	Ok	FALSE	Mila	PB	Spring	D4	PB024	-33.1148	17.987	74	12	2016-09-22	2016-10-06	animal	0	0	NA	NA	eland	1	eland	1	Natural	NA	NA	gentle	game trail	0	NA	adult male
I_00104b.JPG		PB024_Cam12_22Sep-6Oct_2016	2016-10-06	00:54:08	Ok	FALSE	Mila	PB	Spring	D4	PB024	-33.1148	17.987	74	12	2016-09-22	2016-10-06	animal	0	0	NA	NA	eland	1	eland	1	Natural	NA	NA	gentle	game trail	0	NA	adult male
I_00104c.JPG		PB024_Cam12_22Sep-6Oct_2016	2016-10-06	00:54:08	Ok	FALSE	Mila	PB	Spring	D4	PB024	-33.1148	17.987	74	12	2016-09-22	2016-10-06	animal	0	0	NA	NA	eland	1	eland	1	Natural	NA	NA	gentle	game trail	0	NA	adult male
I_00105a.JPG		PB024_Cam12_22Sep-6Oct_2016	2016-10-06	00:55:17	Ok	FALSE	Mila	PB	Spring	D4	PB024	-33.1148	17.987	74	12	2016-09-22	2016-10-06	animal	0	0	NA	NA	eland	1	eland	1	Natural	NA	NA	gentle	game trail	0	NA	adult male
I_00105b.JPG		PB024_Cam12_22Sep-6Oct_2016	2016-10-06	00:55:17	Ok	FALSE	Mila	PB	Spring	D4	PB024	-33.1148	17.987	74	12	2016-09-22	2016-10-06	animal	0	0	NA	NA	eland	1	eland	1	Natural	NA	NA	gentle	game trail	0	NA	adult male
I_00105c.JPG		PB024_Cam12_22Sep-6Oct_2016	2016-10-06	00:55:17	Ok	FALSE	Mila	PB	Spring	D4	PB024	-33.1148	17.987	74	12	2016-09-22	2016-10-06	animal	0	0	NA	NA	eland	1	eland	1	Natural	NA	NA	gentle	game trail	0	NA	adult male
I_00106a.JPG		PB024_Cam12_22Sep-6Oct_2016	2016-10-06	00:56:01	Ok	FALSE	Mila	PB	Spring	D4	PB024	-33.1148	17.987	74	12	2016-09-22	2016-10-06	animal	0	0	NA	NA	eland	1	eland	1	Natural	NA	NA	gentle	game trail	0	NA	adult male
I_00107a.JPG		PB024_Cam12_22Sep-6Oct_2016	2016-10-06	01:02:45	Ok	FALSE	Mila	PB	Spring	D4	PB024	-33.1148	17.987	74	12	2016-09-22	2016-10-06	animal	0	0	NA	NA	eland	1	eland	1	Natural	NA	Species unknown	gentle	game trail	0	NA	NA
I_00108a.JPG		PB024_Cam12_22Sep-6Oct_2016	2016-10-06	07:02:06	Ok	FALSE	Mila	PB	Spring	D4	PB024	-33.1148	17.987	74	12	2016-09-22	2016-10-06	animal	0	0	NA	NA	eland	1	eland	1	Natural	NA	NA	gentle	game trail	0	NA	adult male
I_00108b.JPG		PB024_Cam12_22Sep-6Oct_2016	2016-10-06	07:02:06	Ok	FALSE	Mila	PB	Spring	D4	PB024	-33.1148	17.987	74	12	2016-09-22	2016-10-06	animal	0	0	NA	NA	eland	1	eland	1	Natural	NA	NA	gentle	game trail	0	NA	adult male
I_00108c.JPG		PB024_Cam12_22Sep-6Oct_2016	2016-10-06	07:02:06	Ok	FALSE	Mila	PB	Spring	D4	PB024	-33.1148	17.987	74	12	2016-09-22	2016-10-06	animal	0	0	NA	NA	eland	1	eland	1	Natural	NA	NA	gentle	game trail	0	NA	adult male
I_00109b.JPG		PB024_Cam12_22Sep-6Oct_2016	2016-10-06	07:03:11	Ok	FALSE	Mila	PB	Spring	D4	PB024	-33.1148	17.987	74	12	2016-09-22	2016-10-06	animal	0	0	NA	NA	eland	1	eland	1	Natural	NA	NA	gentle	game trail	0	NA	adult male
I_00109c.JPG		PB024_Cam12_22Sep-6Oct_2016	2016-10-06	07:03:11	Ok	FALSE	Mila	PB	Spring	D4	PB024	-33.1148	17.987	74	12	2016-09-22	2016-10-06	animal	0	0	NA	NA	eland	1	eland	1	Natural	NA	NA	gentle	game trail	0	NA	adult male
I_00110a.JPG		PB024_Cam12_22Sep-6Oct_2016	2016-10-06	07:03:33	Ok	FALSE	Mila	PB	Spring	D4	PB024	-33.1148	17.987	74	12	2016-09-22	2016-10-06	animal	0	0	NA	NA	eland	1	eland	1	Natural	NA	NA	gentle	game trail	0	NA	adult male
I_00110b.JPG		PB024_Cam12_22Sep-6Oct_2016	2016-10-06	07:03:33	Ok	FALSE	Mila	PB	Spring	D4	PB024	-33.1148	17.987	74	12	2016-09-22	2016-10-06	animal	0	0	NA	NA	eland	1	eland	1	Natural	NA	NA	gentle	game trail	0	NA	adult male
I_00110c.JPG		PB024_Cam12_22Sep-6Oct_2016	2016-10-06	07:03:33	Ok	FALSE	Mila	PB	Spring	D4	PB024	-33.1148	17.987	74	12	2016-09-22	2016-10-06	animal	0	0	NA	NA	eland	1	eland	1	Natural	NA	NA	gentle	game trail	0	NA	adult male
I_00111a.JPG		PB024_Cam12_22Sep-6Oct_2016	2016-10-06	07:03:56	Ok	FALSE	Mila	PB	Spring	D4	PB024	-33.1148	17.987	74	12	2016-09-22	2016-10-06	animal	0	0	NA	NA	eland	1	eland	1	Natural	NA	NA	gentle	game trail	0	NA	adult male
I_00112a.JPG		PB024_Cam12_22Sep-6Oct_2016	2016-10-06	07:09:59	Ok	FALSE	Mila	PB	Spring	D4	PB024	-33.1148	17.987	74	12	2016-09-22	2016-10-06	animal	0	0	NA	NA	eland	1	eland	1	Natural	NA	NA	gentle	game trail	0	NA	adult male
I_00112b.JPG		PB024_Cam12_22Sep-6Oct_2016	2016-10-06	07:09:59	Ok	FALSE	Mila	PB	Spring	D4	PB024	-33.1148	17.987	74	12	2016-09-22	2016-10-06	animal	0	0	NA	NA	eland	1	eland	1	Natural	NA	NA	gentle	game trail	0	NA	adult male
I_00112c.JPG		PB024_Cam12_22Sep-6Oct_2016	2016-10-06	07:09:59	Ok	FALSE	Mila	PB	Spring	D4	PB024	-33.1148	17.987	74	12	2016-09-22	2016-10-06	animal	0	0	NA	NA	eland	1	eland	1	Natural	NA	NA	gentle	game trail	0	NA	adult male
I_00113a.JPG		PB024_Cam12_22Sep-6Oct_2016	2016-10-06	07:12:17	Ok	FALSE	Mila	PB	Spring	D4	PB024	-33.1148	17.987	74	12	2016-09-22	2016-10-06	animal	0	0	NA	NA	eland	1	eland	1	Natural	NA	NA	gentle	game trail	0	NA	adult male
I_00113b.JPG		PB024_Cam12_22Sep-6Oct_2016	2016-10-06	07:12:17	Ok	FALSE	Mila	PB	Spring	D4	PB024	-33.1148	17.987	74	12	2016-09-22	2016-10-06	animal	0	0	NA	NA	eland	1	eland	1	Natural	NA	NA	gentle	game trail	0	NA	adult male
I_00113c.JPG		PB024_Cam12_22Sep-6Oct_2016	2016-10-06	07:12:17	Ok	FALSE	Mila	PB	Spring	D4	PB024	-33.1148	17.987	74	12	2016-09-22	2016-10-06	animal	0	0	NA	NA	eland	1	eland	1	Natural	NA	NA	gentle	game trail	0	NA	adult male
I_00103a.JPG		PB024_Cam12_22Sep-6Oct_2016	2016-10-05	19:52:43	Ok	FALSE	Mila	PB	Spring	D4	PB024	-33.1148	17.987	74	12	2016-09-22	2016-10-06	animal	0	0	NA	NA	honey badger	1	honey badger	1	Natural	NA	1 A U	gentle	game trail	0	NA	NA
I_00060a.JPG		PB024_Cam12_22Sep-6Oct_2016	2016-10-04	01:24:13	Ok	FALSE	Mila	PB	Spring	D4	PB024	-33.1148	17.987	74	12	2016-09-22	2016-10-06	animal	0	0	NA	NA	small spotted genet	1	small spotted genet	1	Natural	NA	1 A U	gentle	game trail	0	NA	NA
I_00060b.JPG		PB024_Cam12_22Sep-6Oct_2016	2016-10-04	01:24:13	Ok	FALSE	Mila	PB	Spring	D4	PB024	-33.1148	17.987	74	12	2016-09-22	2016-10-06	animal	0	0	NA	NA	small spotted genet	1	small spotted genet	1	Natural	NA	1 A U	gentle	game trail	0	NA	NA
I_00060c.JPG		PB024_Cam12_22Sep-6Oct_2016	2016-10-04	01:24:13	Ok	FALSE	Mila	PB	Spring	D4	PB024	-33.1148	17.987	74	12	2016-09-22	2016-10-06	animal	0	0	NA	NA	small spotted genet	1	small spotted genet	1	Natural	NA	1 A U	gentle	game trail	0	NA	NA
I_00001a.JPG		PB025_Cam006_25Aug-8Sep_2016	2016-08-25	15:26:24	Ok	FALSE	Debbi	PB	Winter	NA	PB025	-33.111	17.9902	95	NA	2016-08-25	2016-09-08	animal	0	0	NA	NA	guinea fowl	1	guinea fowl	1	Natural	NA	Close to a busy tourist road	gentle	game trail	0	NA	NA
I_00001b.JPG		PB025_Cam006_25Aug-8Sep_2016	2016-08-25	15:26:24	Ok	FALSE	Debbi	PB	Winter	NA	PB025	-33.111	17.9902	95	NA	2016-08-25	2016-09-08	animal	0	0	NA	NA	guinea fowl	1	guinea fowl	1	Natural	NA	Close to a busy tourist road	gentle	game trail	0	NA	NA
I_00001c.JPG		PB025_Cam006_25Aug-8Sep_2016	2016-08-25	15:26:24	Ok	FALSE	Debbi	PB	Winter	NA	PB025	-33.111	17.9902	95	NA	2016-08-25	2016-09-08	animal	0	0	NA	NA	guinea fowl	1	guinea fowl	1	Natural	NA	Close to a busy tourist road	gentle	game trail	0	NA	NA
I_00002a.JPG		PB025_Cam006_25Aug-8Sep_2016	2016-08-25	15:29:09	Ok	FALSE	Debbi	PB	Winter	NA	PB025	-33.111	17.9902	95	NA	2016-08-25	2016-09-08	animal	0	0	NA	NA	guinea fowl	1	guinea fowl	1	Natural	NA	Close to a busy tourist road	gentle	game trail	0	NA	NA
I_00002b.JPG		PB025_Cam006_25Aug-8Sep_2016	2016-08-25	15:29:09	Ok	FALSE	Debbi	PB	Winter	NA	PB025	-33.111	17.9902	95	NA	2016-08-25	2016-09-08	animal	0	0	NA	NA	guinea fowl	1	guinea fowl	1	Natural	NA	Close to a busy tourist road	gentle	game trail	0	NA	NA
I_00002c.JPG		PB025_Cam006_25Aug-8Sep_2016	2016-08-25	15:29:09	Ok	FALSE	Debbi	PB	Winter	NA	PB025	-33.111	17.9902	95	NA	2016-08-25	2016-09-08	animal	0	0	NA	NA	guinea fowl	1	guinea fowl	1	Natural	NA	Close to a busy tourist road	gentle	game trail	0	NA	NA
I_00103a.JPG		PB028_Cam15_26Aug-9Sep_2016	2016-09-01	22:28:09	Ok	FALSE	debbi	PB	Spring	D6	PB028	-33.1135	18.0028	134	15	2016-08-26	2016-09-09	animal	0	0	NA	NA	blue wildebeest	1	blue wildebeest	1	Natural	NA	Adult, unknown sex	gentle	private road	1	NA	NA
I_00104b.JPG		PB028_Cam15_26Aug-9Sep_2016	2016-09-01	23:52:13	Ok	FALSE	debbi	PB	Spring	D6	PB028	-33.1135	18.0028	134	15	2016-08-26	2016-09-09	animal	0	0	NA	NA	blue wildebeest	1	blue wildebeest	1	Natural	NA	Adult, sex unknown	gentle	private road	1	NA	NA
I_00104c.JPG		PB028_Cam15_26Aug-9Sep_2016	2016-09-01	23:52:13	Ok	FALSE	debbi	PB	Spring	D6	PB028	-33.1135	18.0028	134	15	2016-08-26	2016-09-09	animal	0	0	NA	NA	blue wildebeest	2	blue wildebeest	2	Natural	NA	1 adult, unknow sex. 1 juvenile, unknown sex	gentle	private road	1	NA	NA
I_00105a.JPG		PB028_Cam15_26Aug-9Sep_2016	2016-09-01	23:52:38	Ok	FALSE	debbi	PB	Spring	D6	PB028	-33.1135	18.0028	134	15	2016-08-26	2016-09-09	animal	0	0	NA	NA	blue wildebeest	1	blue wildebeest	1	Natural	NA	1 adult, unknown sex	gentle	private road	1	NA	NA
I_00105b.JPG		PB028_Cam15_26Aug-9Sep_2016	2016-09-01	23:52:38	Ok	FALSE	debbi	PB	Spring	D6	PB028	-33.1135	18.0028	134	15	2016-08-26	2016-09-09	animal	0	0	NA	NA	blue wildebeest	1	blue wildebeest	1	Natural	NA	1 dult, unknow sex	gentle	private road	1	NA	NA
I_00105c.JPG		PB028_Cam15_26Aug-9Sep_2016	2016-09-01	23:52:38	Ok	FALSE	debbi	PB	Spring	D6	PB028	-33.1135	18.0028	134	15	2016-08-26	2016-09-09	animal	0	0	NA	NA	blue wildebeest	1	blue wildebeest	1	Natural	NA	1 adult, unknown sex	gentle	private road	1	NA	NA
I_00106a.JPG		PB028_Cam15_26Aug-9Sep_2016	2016-09-01	23:55:05	Ok	FALSE	debbi	PB	Spring	D6	PB028	-33.1135	18.0028	134	15	2016-08-26	2016-09-09	animal	0	0	NA	NA	blue wildebeest	1	blue wildebeest	1	Natural	NA	adult, unknown sex	gentle	private road	1	NA	NA
I_00106c.JPG		PB028_Cam15_26Aug-9Sep_2016	2016-09-01	23:55:05	Ok	FALSE	debbi	PB	Spring	D6	PB028	-33.1135	18.0028	134	15	2016-08-26	2016-09-09	animal	0	0	NA	NA	blue wildebeest	1	blue wildebeest	1	Natural	NA	1 juvenile unknown sex	gentle	private road	1	NA	NA
I_00107a.JPG		PB028_Cam15_26Aug-9Sep_2016	2016-09-01	23:55:39	Ok	FALSE	debbi	PB	Spring	D6	PB028	-33.1135	18.0028	134	15	2016-08-26	2016-09-09	animal	0	0	NA	NA	blue wildebeest	1	blue wildebeest	1	Natural	NA	1 adult, unknown sex	gentle	private road	1	NA	NA
I_00107b.JPG		PB028_Cam15_26Aug-9Sep_2016	2016-09-01	23:55:39	Ok	FALSE	debbi	PB	Spring	D6	PB028	-33.1135	18.0028	134	15	2016-08-26	2016-09-09	animal	0	0	NA	NA	blue wildebeest	1	blue wildebeest	1	Natural	NA	1 adult, unknow sex	gentle	private road	1	NA	NA
I_00136a.JPG		PB028_Cam15_26Aug-9Sep_2016	2016-09-04	21:50:09	Ok	FALSE	debbi	PB	Spring	D6	PB028	-33.1135	18.0028	134	15	2016-08-26	2016-09-09	animal	0	0	NA	NA	blue wildebeest	1	blue wildebeest	1	Natural	NA	1 A U	gentle	private road	1	NA	NA
I_00136b.JPG		PB028_Cam15_26Aug-9Sep_2016	2016-09-04	21:50:09	Ok	FALSE	debbi	PB	Spring	D6	PB028	-33.1135	18.0028	134	15	2016-08-26	2016-09-09	animal	0	0	NA	NA	blue wildebeest	1	blue wildebeest	1	Natural	NA	1 A U	gentle	private road	1	NA	NA
I_00137a.JPG		PB028_Cam15_26Aug-9Sep_2016	2016-09-04	21:50:56	Ok	FALSE	debbi	PB	Spring	D6	PB028	-33.1135	18.0028	134	15	2016-08-26	2016-09-09	animal	0	0	NA	NA	blue wildebeest	1	blue wildebeest	1	Natural	NA	1 A U	gentle	private road	1	NA	NA
I_00137b.JPG		PB028_Cam15_26Aug-9Sep_2016	2016-09-04	21:50:56	Ok	FALSE	debbi	PB	Spring	D6	PB028	-33.1135	18.0028	134	15	2016-08-26	2016-09-09	animal	0	0	NA	NA	blue wildebeest	1	blue wildebeest	1	Natural	NA	1 A U	gentle	private road	1	NA	NA
I_00138b.JPG		PB028_Cam15_26Aug-9Sep_2016	2016-09-04	21:51:21	Ok	FALSE	debbi	PB	Spring	D6	PB028	-33.1135	18.0028	134	15	2016-08-26	2016-09-09	animal	0	0	NA	NA	blue wildebeest	1	blue wildebeest	1	Natural	NA	1 A U	gentle	private road	1	NA	NA
I_00147a.JPG		PB028_Cam15_26Aug-9Sep_2016	2016-09-06	01:44:59	Ok	FALSE	debbi	PB	Spring	D6	PB028	-33.1135	18.0028	134	15	2016-08-26	2016-09-09	animal	0	0	NA	NA	blue wildebeest	1	blue wildebeest	1	Natural	NA	1 A U	gentle	private road	1	NA	NA
I_00147b.JPG		PB028_Cam15_26Aug-9Sep_2016	2016-09-06	01:44:59	Ok	FALSE	debbi	PB	Spring	D6	PB028	-33.1135	18.0028	134	15	2016-08-26	2016-09-09	animal	0	0	NA	NA	blue wildebeest	1	blue wildebeest	1	Natural	NA	1 A U	gentle	private road	1	NA	NA
I_00147c.JPG		PB028_Cam15_26Aug-9Sep_2016	2016-09-06	01:44:59	Ok	FALSE	debbi	PB	Spring	D6	PB028	-33.1135	18.0028	134	15	2016-08-26	2016-09-09	animal	0	0	NA	NA	blue wildebeest	1	blue wildebeest	1	Natural	NA	1 A U	gentle	private road	1	NA	NA
I_00014a.JPG		PB028_Cam15_26Aug-9Sep_2016	2016-08-26	18:49:35	Ok	FALSE	debbi	PB	Winter	D6	PB028	-33.1135	18.0028	134	15	2016-08-26	2016-09-09	animal	0	0	NA	NA	cape mountain zebra	1	cape mountain zebra	1	Natural	NA	Adult sex unknown	gentle	private road	1	NA	NA
I_00014b.JPG		PB028_Cam15_26Aug-9Sep_2016	2016-08-26	18:49:35	Ok	FALSE	debbi	PB	Winter	D6	PB028	-33.1135	18.0028	134	15	2016-08-26	2016-09-09	animal	0	0	NA	NA	cape mountain zebra	1	cape mountain zebra	1	Natural	NA	Adult sex unknow	gentle	private road	1	NA	NA
I_00014c.JPG		PB028_Cam15_26Aug-9Sep_2016	2016-08-26	18:49:35	Ok	FALSE	debbi	PB	Winter	D6	PB028	-33.1135	18.0028	134	15	2016-08-26	2016-09-09	animal	0	0	NA	NA	cape mountain zebra	2	cape mountain zebra	2	Natural	NA	sex of 2 unknown	gentle	private road	1	NA	adult female
I_00015a.JPG		PB028_Cam15_26Aug-9Sep_2016	2016-08-27	04:39:47	Ok	FALSE	debbi	PB	Winter	D6	PB028	-33.1135	18.0028	134	15	2016-08-26	2016-09-09	animal	0	0	NA	NA	cape mountain zebra	1	cape mountain zebra	1	Natural	NA	adult sex unknown	gentle	private road	1	NA	NA
I_00016b.JPG		PB028_Cam15_26Aug-9Sep_2016	2016-08-27	04:41:14	Ok	FALSE	debbi	PB	Winter	D6	PB028	-33.1135	18.0028	134	15	2016-08-26	2016-09-09	animal	0	0	NA	NA	cape mountain zebra	1	cape mountain zebra	1	Natural	NA	unknown sex	gentle	private road	1	NA	NA
I_00016c.JPG		PB028_Cam15_26Aug-9Sep_2016	2016-08-27	04:41:14	Ok	FALSE	debbi	PB	Winter	D6	PB028	-33.1135	18.0028	134	15	2016-08-26	2016-09-09	animal	0	0	NA	NA	cape mountain zebra	1	cape mountain zebra	1	Natural	NA	unknown sex	gentle	private road	1	NA	NA
I_00017a.JPG		PB028_Cam15_26Aug-9Sep_2016	2016-08-27	04:41:38	Ok	FALSE	debbi	PB	Winter	D6	PB028	-33.1135	18.0028	134	15	2016-08-26	2016-09-09	animal	0	0	NA	NA	cape mountain zebra	1	cape mountain zebra	1	Natural	NA	unknown sex	gentle	private road	1	NA	NA
I_00017b.JPG		PB028_Cam15_26Aug-9Sep_2016	2016-08-27	04:41:38	Ok	FALSE	debbi	PB	Winter	D6	PB028	-33.1135	18.0028	134	15	2016-08-26	2016-09-09	animal	0	0	NA	NA	cape mountain zebra	1	cape mountain zebra	1	Natural	NA	NA	gentle	private road	1	NA	NA
I_00018a.JPG		PB028_Cam15_26Aug-9Sep_2016	2016-08-27	04:42:46	Ok	FALSE	debbi	PB	Winter	D6	PB028	-33.1135	18.0028	134	15	2016-08-26	2016-09-09	animal	0	0	NA	NA	cape mountain zebra	1	cape mountain zebra	1	Natural	NA	NA	gentle	private road	1	NA	NA
I_00019a.JPG		PB028_Cam15_26Aug-9Sep_2016	2016-08-27	04:43:15	Ok	FALSE	debbi	PB	Winter	D6	PB028	-33.1135	18.0028	134	15	2016-08-26	2016-09-09	animal	0	0	NA	NA	cape mountain zebra	1	cape mountain zebra	1	Natural	NA	NA	gentle	private road	1	NA	NA
I_00060a.JPG		PB028_Cam15_26Aug-9Sep_2016	2016-08-28	18:39:23	Ok	FALSE	debbi	PB	Winter	D6	PB028	-33.1135	18.0028	134	15	2016-08-26	2016-09-09	animal	0	0	NA	NA	cape mountain zebra	1	cape mountain zebra	1	Natural	NA	adult, unknown sex	gentle	private road	1	NA	NA
I_00061a.JPG		PB028_Cam15_26Aug-9Sep_2016	2016-08-29	06:25:56	Ok	FALSE	debbi	PB	Winter	D6	PB028	-33.1135	18.0028	134	15	2016-08-26	2016-09-09	animal	0	0	NA	NA	cape mountain zebra	1	cape mountain zebra	1	Natural	NA	adult, unknown sex	gentle	private road	1	NA	NA
I_00069a.JPG		PB028_Cam15_26Aug-9Sep_2016	2016-08-29	18:35:07	Ok	FALSE	debbi	PB	Winter	D6	PB028	-33.1135	18.0028	134	15	2016-08-26	2016-09-09	animal	0	0	NA	NA	cape mountain zebra	1	cape mountain zebra	1	Natural	NA	adult, unknown sex	gentle	private road	1	NA	NA
I_00069b.JPG		PB028_Cam15_26Aug-9Sep_2016	2016-08-29	18:35:07	Ok	FALSE	debbi	PB	Winter	D6	PB028	-33.1135	18.0028	134	15	2016-08-26	2016-09-09	animal	0	0	NA	NA	cape mountain zebra	1	cape mountain zebra	1	Natural	NA	adult unknown sex	gentle	private road	1	NA	NA
I_00070a.JPG		PB028_Cam15_26Aug-9Sep_2016	2016-08-29	18:41:15	Ok	FALSE	debbi	PB	Winter	D6	PB028	-33.1135	18.0028	134	15	2016-08-26	2016-09-09	animal	0	0	NA	NA	cape mountain zebra	1	cape mountain zebra	1	Natural	NA	adult, unknown sex	gentle	private road	1	NA	NA
I_00070b.JPG		PB028_Cam15_26Aug-9Sep_2016	2016-08-29	18:41:15	Ok	FALSE	debbi	PB	Winter	D6	PB028	-33.1135	18.0028	134	15	2016-08-26	2016-09-09	animal	0	0	NA	NA	cape mountain zebra	1	cape mountain zebra	1	Natural	NA	adult, unknown sex	gentle	private road	1	NA	NA
I_00071a.JPG		PB028_Cam15_26Aug-9Sep_2016	2016-08-29	18:41:37	Ok	FALSE	debbi	PB	Winter	D6	PB028	-33.1135	18.0028	134	15	2016-08-26	2016-09-09	animal	0	0	NA	NA	cape mountain zebra	1	cape mountain zebra	1	Natural	NA	Adult, unknown sex	gentle	private road	1	NA	NA
I_00072a.JPG		PB028_Cam15_26Aug-9Sep_2016	2016-08-30	02:17:39	Ok	FALSE	debbi	PB	Winter	D6	PB028	-33.1135	18.0028	134	15	2016-08-26	2016-09-09	animal	0	0	NA	NA	cape mountain zebra	1	cape mountain zebra	1	Natural	NA	Adult, unknown sex	gentle	private road	1	NA	NA
I_00074a.JPG		PB028_Cam15_26Aug-9Sep_2016	2016-08-30	02:44:38	Ok	FALSE	debbi	PB	Winter	D6	PB028	-33.1135	18.0028	134	15	2016-08-26	2016-09-09	animal	0	0	NA	NA	cape mountain zebra	1	cape mountain zebra	1	Natural	NA	Adult, unknown sex	gentle	private road	1	NA	NA
I_00075a.JPG		PB028_Cam15_26Aug-9Sep_2016	2016-08-30	02:45:36	Ok	FALSE	debbi	PB	Winter	D6	PB028	-33.1135	18.0028	134	15	2016-08-26	2016-09-09	animal	0	0	NA	NA	cape mountain zebra	1	cape mountain zebra	1	Natural	NA	adult, unknown sex	gentle	private road	1	NA	NA
I_00085a.JPG		PB028_Cam15_26Aug-9Sep_2016	2016-08-30	21:17:51	Ok	FALSE	debbi	PB	Winter	D6	PB028	-33.1135	18.0028	134	15	2016-08-26	2016-09-09	animal	0	0	NA	NA	cape mountain zebra	1	cape mountain zebra	1	Natural	NA	Adult, unknown sex	gentle	private road	1	NA	NA
I_00086a.JPG		PB028_Cam15_26Aug-9Sep_2016	2016-08-30	21:23:44	Ok	FALSE	debbi	PB	Winter	D6	PB028	-33.1135	18.0028	134	15	2016-08-26	2016-09-09	animal	0	0	NA	NA	cape mountain zebra	1	cape mountain zebra	1	Natural	NA	Adult, unkown sex	gentle	private road	1	NA	NA
I_00090c.JPG		PB028_Cam15_26Aug-9Sep_2016	2016-08-31	18:14:33	Ok	FALSE	debbi	PB	Winter	D6	PB028	-33.1135	18.0028	134	15	2016-08-26	2016-09-09	animal	0	0	NA	NA	cape mountain zebra	1	cape mountain zebra	1	Natural	NA	Adult, unknown sex	gentle	private road	1	NA	NA
I_00097a.JPG		PB028_Cam15_26Aug-9Sep_2016	2016-09-01	18:46:44	Ok	FALSE	debbi	PB	Spring	D6	PB028	-33.1135	18.0028	134	15	2016-08-26	2016-09-09	animal	0	0	NA	NA	cape mountain zebra	1	cape mountain zebra	1	Natural	NA	Adult, unknown sex	gentle	private road	1	NA	NA
I_00097b.JPG		PB028_Cam15_26Aug-9Sep_2016	2016-09-01	18:46:44	Ok	FALSE	debbi	PB	Spring	D6	PB028	-33.1135	18.0028	134	15	2016-08-26	2016-09-09	animal	0	0	NA	NA	cape mountain zebra	1	cape mountain zebra	1	Natural	NA	Adu;t, unknown sex	gentle	private road	1	NA	NA
I_00098a.JPG		PB028_Cam15_26Aug-9Sep_2016	2016-09-01	18:47:06	Ok	FALSE	debbi	PB	Spring	D6	PB028	-33.1135	18.0028	134	15	2016-08-26	2016-09-09	animal	0	0	NA	NA	cape mountain zebra	1	cape mountain zebra	1	Natural	NA	Adult, unknown sex	gentle	private road	1	NA	NA
I_00099b.JPG		PB028_Cam15_26Aug-9Sep_2016	2016-09-01	18:47:31	Ok	FALSE	debbi	PB	Spring	D6	PB028	-33.1135	18.0028	134	15	2016-08-26	2016-09-09	animal	0	0	NA	NA	cape mountain zebra	1	cape mountain zebra	1	Natural	NA	Adult, unknown sex	gentle	private road	1	NA	NA
I_00099c.JPG		PB028_Cam15_26Aug-9Sep_2016	2016-09-01	18:47:31	Ok	FALSE	debbi	PB	Spring	D6	PB028	-33.1135	18.0028	134	15	2016-08-26	2016-09-09	animal	0	0	NA	NA	cape mountain zebra	1	cape mountain zebra	1	Natural	NA	Adu;t, unknown sex	gentle	private road	1	NA	NA
I_00100a.JPG		PB028_Cam15_26Aug-9Sep_2016	2016-09-01	18:47:53	Ok	FALSE	debbi	PB	Spring	D6	PB028	-33.1135	18.0028	134	15	2016-08-26	2016-09-09	animal	0	0	NA	NA	cape mountain zebra	1	cape mountain zebra	1	Natural	NA	Adult, unknown sex	gentle	private road	1	NA	adult female
I_00100b.JPG		PB028_Cam15_26Aug-9Sep_2016	2016-09-01	18:47:53	Ok	FALSE	debbi	PB	Spring	D6	PB028	-33.1135	18.0028	134	15	2016-08-26	2016-09-09	animal	0	0	NA	NA	cape mountain zebra	1	cape mountain zebra	1	Natural	NA	NA	gentle	private road	1	NA	adult female
I_00100c.JPG		PB028_Cam15_26Aug-9Sep_2016	2016-09-01	18:47:53	Ok	FALSE	debbi	PB	Spring	D6	PB028	-33.1135	18.0028	134	15	2016-08-26	2016-09-09	animal	0	0	NA	NA	cape mountain zebra	1	cape mountain zebra	1	Natural	NA	NA	gentle	private road	1	NA	adult female
I_00101a.JPG		PB028_Cam15_26Aug-9Sep_2016	2016-09-01	18:48:18	Ok	FALSE	debbi	PB	Spring	D6	PB028	-33.1135	18.0028	134	15	2016-08-26	2016-09-09	animal	0	0	NA	NA	cape mountain zebra	1	cape mountain zebra	1	Natural	NA	Adult, unknown sex	gentle	private road	1	NA	NA
I_00101b.JPG		PB028_Cam15_26Aug-9Sep_2016	2016-09-01	18:48:18	Ok	FALSE	debbi	PB	Spring	D6	PB028	-33.1135	18.0028	134	15	2016-08-26	2016-09-09	animal	0	0	NA	NA	cape mountain zebra	1	cape mountain zebra	1	Natural	NA	Adult, unkown sex	gentle	private road	1	NA	NA
I_00102a.JPG		PB028_Cam15_26Aug-9Sep_2016	2016-09-01	18:49:48	Ok	FALSE	debbi	PB	Spring	D6	PB028	-33.1135	18.0028	134	15	2016-08-26	2016-09-09	animal	0	0	NA	NA	cape mountain zebra	1	cape mountain zebra	1	Natural	NA	Adult, unknown sex	gentle	private road	1	NA	NA
I_00102b.JPG		PB028_Cam15_26Aug-9Sep_2016	2016-09-01	18:49:48	Ok	FALSE	debbi	PB	Spring	D6	PB028	-33.1135	18.0028	134	15	2016-08-26	2016-09-09	animal	0	0	NA	NA	cape mountain zebra	1	cape mountain zebra	1	Natural	NA	Adult, unknown sex	gentle	private road	1	NA	NA
I_00112a.JPG		PB028_Cam15_26Aug-9Sep_2016	2016-09-02	17:40:00	Ok	FALSE	debbi	PB	Spring	D6	PB028	-33.1135	18.0028	134	15	2016-08-26	2016-09-09	animal	0	0	NA	NA	cape mountain zebra	1	cape mountain zebra	1	Natural	NA	adult, unknown sex	gentle	private road	1	NA	NA
I_00112b.JPG		PB028_Cam15_26Aug-9Sep_2016	2016-09-02	17:40:00	Ok	FALSE	debbi	PB	Spring	D6	PB028	-33.1135	18.0028	134	15	2016-08-26	2016-09-09	animal	0	0	NA	NA	cape mountain zebra	1	cape mountain zebra	1	Natural	NA	adult, unknown sex	gentle	private road	1	NA	NA
I_00112c.JPG		PB028_Cam15_26Aug-9Sep_2016	2016-09-02	17:40:00	Ok	FALSE	debbi	PB	Spring	D6	PB028	-33.1135	18.0028	134	15	2016-08-26	2016-09-09	animal	0	0	NA	NA	cape mountain zebra	1	cape mountain zebra	1	Natural	NA	adult, unknown sex	gentle	private road	1	NA	NA
I_00113a.JPG		PB028_Cam15_26Aug-9Sep_2016	2016-09-02	17:43:13	Ok	FALSE	debbi	PB	Spring	D6	PB028	-33.1135	18.0028	134	15	2016-08-26	2016-09-09	animal	0	0	NA	NA	cape mountain zebra	1	cape mountain zebra	1	Natural	NA	adult, unknown sex	gentle	private road	1	NA	NA
I_00122a.JPG		PB028_Cam15_26Aug-9Sep_2016	2016-09-03	18:45:30	Ok	FALSE	debbi	PB	Spring	D6	PB028	-33.1135	18.0028	134	15	2016-08-26	2016-09-09	animal	0	0	NA	NA	cape mountain zebra	1	cape mountain zebra	1	Natural	NA	adult, unknown sex	gentle	private road	1	NA	NA
I_00123a.JPG		PB028_Cam15_26Aug-9Sep_2016	2016-09-03	18:45:53	Ok	FALSE	debbi	PB	Spring	D6	PB028	-33.1135	18.0028	134	15	2016-08-26	2016-09-09	animal	0	0	NA	NA	cape mountain zebra	1	cape mountain zebra	1	Natural	NA	adult, unknow sex	gentle	private road	1	NA	NA
I_00124a.JPG		PB028_Cam15_26Aug-9Sep_2016	2016-09-03	18:46:16	Ok	FALSE	debbi	PB	Spring	D6	PB028	-33.1135	18.0028	134	15	2016-08-26	2016-09-09	animal	0	0	NA	NA	cape mountain zebra	1	cape mountain zebra	1	Natural	NA	adult, unknow sex	gentle	private road	1	NA	NA
I_00125a.JPG		PB028_Cam15_26Aug-9Sep_2016	2016-09-04	00:22:22	Ok	FALSE	debbi	PB	Spring	D6	PB028	-33.1135	18.0028	134	15	2016-08-26	2016-09-09	animal	0	0	NA	NA	cape mountain zebra	1	cape mountain zebra	1	Natural	NA	adult, unknown sex	gentle	private road	1	NA	NA
I_00126a.JPG		PB028_Cam15_26Aug-9Sep_2016	2016-09-04	00:23:16	Ok	FALSE	debbi	PB	Spring	D6	PB028	-33.1135	18.0028	134	15	2016-08-26	2016-09-09	animal	0	0	NA	NA	cape mountain zebra	1	cape mountain zebra	1	Natural	NA	adult, unknow sex	gentle	private road	1	NA	NA
I_00153a.JPG		PB028_Cam15_26Aug-9Sep_2016	2016-09-06	21:12:13	Ok	FALSE	debbi	PB	Spring	D6	PB028	-33.1135	18.0028	134	15	2016-08-26	2016-09-09	animal	0	0	NA	NA	cape mountain zebra	1	cape mountain zebra	1	Natural	NA	1 A U	gentle	private road	1	NA	NA
I_00154a.JPG		PB028_Cam15_26Aug-9Sep_2016	2016-09-06	21:12:45	Ok	FALSE	debbi	PB	Spring	D6	PB028	-33.1135	18.0028	134	15	2016-08-26	2016-09-09	animal	0	0	NA	NA	cape mountain zebra	1	cape mountain zebra	1	Natural	NA	1 A U	gentle	private road	1	NA	NA
I_00108a.JPG		PB028_Cam15_26Aug-9Sep_2016	2016-09-02	09:43:41	Ok	FALSE	debbi	PB	Spring	D6	PB028	-33.1135	18.0028	134	15	2016-08-26	2016-09-09	animal	0	0	NA	NA	cape spurfowl	1	cape spurfowl	1	Natural	NA	NA	gentle	private road	1	NA	NA
I_00108b.JPG		PB028_Cam15_26Aug-9Sep_2016	2016-09-02	09:43:41	Ok	FALSE	debbi	PB	Spring	D6	PB028	-33.1135	18.0028	134	15	2016-08-26	2016-09-09	animal	0	0	NA	NA	cape spurfowl	1	cape spurfowl	1	Natural	NA	NA	gentle	private road	1	NA	NA
I_00108c.JPG		PB028_Cam15_26Aug-9Sep_2016	2016-09-02	09:43:41	Ok	FALSE	debbi	PB	Spring	D6	PB028	-33.1135	18.0028	134	15	2016-08-26	2016-09-09	animal	0	0	NA	NA	cape spurfowl	1	cape spurfowl	1	Natural	NA	NA	gentle	private road	1	NA	NA
I_00109a.JPG		PB028_Cam15_26Aug-9Sep_2016	2016-09-02	09:44:03	Ok	FALSE	debbi	PB	Spring	D6	PB028	-33.1135	18.0028	134	15	2016-08-26	2016-09-09	animal	0	0	NA	NA	cape spurfowl	1	cape spurfowl	1	Natural	NA	NA	gentle	private road	1	NA	NA
I_00109b.JPG		PB028_Cam15_26Aug-9Sep_2016	2016-09-02	09:44:03	Ok	FALSE	debbi	PB	Spring	D6	PB028	-33.1135	18.0028	134	15	2016-08-26	2016-09-09	animal	0	0	NA	NA	cape spurfowl	1	cape spurfowl	1	Natural	NA	NA	gentle	private road	1	NA	NA
I_00109c.JPG		PB028_Cam15_26Aug-9Sep_2016	2016-09-02	09:44:03	Ok	FALSE	debbi	PB	Spring	D6	PB028	-33.1135	18.0028	134	15	2016-08-26	2016-09-09	animal	0	0	NA	NA	cape spurfowl	1	cape spurfowl	1	Natural	NA	NA	gentle	private road	1	NA	NA
I_00160a.JPG		PB028_Cam15_26Aug-9Sep_2016	2016-09-08	22:56:53	Ok	FALSE	debbi	PB	Spring	D6	PB028	-33.1135	18.0028	134	15	2016-08-26	2016-09-09	animal	0	0	NA	NA	eland	1	eland	1	Natural	NA	1 A U	gentle	private road	1	NA	NA
I_00160b.JPG		PB028_Cam15_26Aug-9Sep_2016	2016-09-08	22:56:53	Ok	FALSE	debbi	PB	Spring	D6	PB028	-33.1135	18.0028	134	15	2016-08-26	2016-09-09	animal	0	0	NA	NA	eland	1	eland	1	Natural	NA	1 A U	gentle	private road	1	NA	NA
I_00160c.JPG		PB028_Cam15_26Aug-9Sep_2016	2016-09-08	22:56:53	Ok	FALSE	debbi	PB	Spring	D6	PB028	-33.1135	18.0028	134	15	2016-08-26	2016-09-09	animal	0	0	NA	NA	eland	1	eland	1	Natural	NA	1 A U	gentle	private road	1	NA	NA
I_00161a.JPG		PB028_Cam15_26Aug-9Sep_2016	2016-09-08	22:58:16	Ok	FALSE	debbi	PB	Spring	D6	PB028	-33.1135	18.0028	134	15	2016-08-26	2016-09-09	animal	0	0	NA	NA	eland	1	eland	1	Natural	NA	1 A U	gentle	private road	1	NA	NA
I_00162a.JPG		PB028_Cam15_26Aug-9Sep_2016	2016-09-08	23:00:15	Ok	FALSE	debbi	PB	Spring	D6	PB028	-33.1135	18.0028	134	15	2016-08-26	2016-09-09	animal	0	0	NA	NA	eland	1	eland	1	Natural	NA	1 A U	gentle	private road	1	NA	NA
I_00163a.JPG		PB028_Cam15_26Aug-9Sep_2016	2016-09-08	23:01:17	Ok	FALSE	debbi	PB	Spring	D6	PB028	-33.1135	18.0028	134	15	2016-08-26	2016-09-09	animal	0	0	NA	NA	eland	1	eland	1	Natural	NA	1 A U	gentle	private road	1	NA	NA
I_00164a.JPG		PB028_Cam15_26Aug-9Sep_2016	2016-09-09	02:09:43	Ok	FALSE	debbi	PB	Spring	D6	PB028	-33.1135	18.0028	134	15	2016-08-26	2016-09-09	animal	0	0	NA	NA	eland	1	eland	1	Natural	NA	1 A U	gentle	private road	1	NA	NA
I_00165a.JPG		PB028_Cam15_26Aug-9Sep_2016	2016-09-09	02:12:56	Ok	FALSE	debbi	PB	Spring	D6	PB028	-33.1135	18.0028	134	15	2016-08-26	2016-09-09	animal	0	0	NA	NA	eland	1	eland	1	Natural	NA	1 A U	gentle	private road	1	NA	NA
I_00166a.JPG		PB028_Cam15_26Aug-9Sep_2016	2016-09-09	02:13:46	Ok	FALSE	debbi	PB	Spring	D6	PB028	-33.1135	18.0028	134	15	2016-08-26	2016-09-09	animal	0	0	NA	NA	eland	1	eland	1	Natural	NA	1 A U	gentle	private road	1	NA	NA
I_00167a.JPG		PB028_Cam15_26Aug-9Sep_2016	2016-09-09	02:14:15	Ok	FALSE	debbi	PB	Spring	D6	PB028	-33.1135	18.0028	134	15	2016-08-26	2016-09-09	animal	0	0	NA	NA	eland	1	eland	1	Natural	NA	1 A U	gentle	private road	1	NA	NA
I_00168a.JPG		PB028_Cam15_26Aug-9Sep_2016	2016-09-09	07:04:28	Ok	FALSE	debbi	PB	Spring	D6	PB028	-33.1135	18.0028	134	15	2016-08-26	2016-09-09	animal	0	0	NA	NA	eland	1	eland	1	Natural	NA	1 A U	gentle	private road	1	NA	NA
I_00168b.JPG		PB028_Cam15_26Aug-9Sep_2016	2016-09-09	07:04:28	Ok	FALSE	debbi	PB	Spring	D6	PB028	-33.1135	18.0028	134	15	2016-08-26	2016-09-09	animal	0	0	NA	NA	eland	1	eland	1	Natural	NA	1 A U	gentle	private road	1	NA	NA
I_00036a.JPG		PB028_Cam15_26Aug-9Sep_2016	2016-08-27	22:04:57	Ok	FALSE	debbi	PB	Winter	D6	PB028	-33.1135	18.0028	134	15	2016-08-26	2016-09-09	animal	0	0	NA	NA	gemsbok	1	gemsbok	1	Natural	NA	NA	gentle	private road	1	NA	NA
I_00084a.JPG		PB028_Cam15_26Aug-9Sep_2016	2016-08-30	19:12:30	Ok	FALSE	debbi	PB	Winter	D6	PB028	-33.1135	18.0028	134	15	2016-08-26	2016-09-09	animal	0	0	NA	NA	gemsbok	1	gemsbok	1	Natural	NA	Adult, unknown sex	gentle	private road	1	NA	NA
I_00084b.JPG		PB028_Cam15_26Aug-9Sep_2016	2016-08-30	19:12:30	Ok	FALSE	debbi	PB	Winter	D6	PB028	-33.1135	18.0028	134	15	2016-08-26	2016-09-09	animal	0	0	NA	NA	gemsbok	1	gemsbok	1	Natural	NA	Adukt, unkniwn sex	gentle	private road	1	NA	NA
I_00084c.JPG		PB028_Cam15_26Aug-9Sep_2016	2016-08-30	19:12:30	Ok	FALSE	debbi	PB	Winter	D6	PB028	-33.1135	18.0028	134	15	2016-08-26	2016-09-09	animal	0	0	NA	NA	gemsbok	1	gemsbok	1	Natural	NA	Adult, unknown sex	gentle	private road	1	NA	NA
I_00110a.JPG		PB028_Cam15_26Aug-9Sep_2016	2016-09-02	12:14:00	Ok	FALSE	debbi	PB	Spring	D6	PB028	-33.1135	18.0028	134	15	2016-08-26	2016-09-09	animal	0	0	NA	NA	guinea fowl	1	guinea fowl	1	Natural	NA	NA	gentle	private road	1	NA	NA
I_00008a.JPG		PB028_Cam15_26Aug-9Sep_2016	2016-08-26	14:49:54	Ok	FALSE	debbi	PB	Winter	D6	PB028	-33.1135	18.0028	134	15	2016-08-26	2016-09-09	animal	0	0	NA	NA	kelp gull	2	kelp gull	2	Natural	NA	NA	gentle	private road	1	NA	NA
I_00032b.JPG		PB028_Cam15_26Aug-9Sep_2016	2016-08-27	14:17:31	Ok	FALSE	debbi	PB	Winter	D6	PB028	-33.1135	18.0028	134	15	2016-08-26	2016-09-09	animal	0	0	NA	NA	kelp gull	7	kelp gull	7	Natural	NA	2 unidentifiable birds	gentle	private road	1	NA	NA
I_00032c.JPG		PB028_Cam15_26Aug-9Sep_2016	2016-08-27	14:17:31	Ok	FALSE	debbi	PB	Winter	D6	PB028	-33.1135	18.0028	134	15	2016-08-26	2016-09-09	animal	0	0	NA	NA	kelp gull	8	kelp gull	8	Natural	NA	NA	gentle	private road	1	NA	NA
I_00118b.JPG		PB028_Cam15_26Aug-9Sep_2016	2016-09-03	13:05:29	Ok	FALSE	debbi	PB	Spring	D6	PB028	-33.1135	18.0028	134	15	2016-08-26	2016-09-09	animal	0	0	NA	NA	kelp gull	1	kelp gull	1	Natural	NA	NA	gentle	private road	1	NA	NA
I_00135c.JPG		PB028_Cam15_26Aug-9Sep_2016	2016-09-04	17:35:28	Ok	FALSE	debbi	PB	Spring	D6	PB028	-33.1135	18.0028	134	15	2016-08-26	2016-09-09	animal	0	0	NA	NA	kudu	2	kudu	2	Natural	NA	2 A M	gentle	private road	1	NA	NA
I_00135a.JPG		PB028_Cam15_26Aug-9Sep_2016	2016-09-04	17:35:28	Ok	FALSE	debbi	PB	Spring	D6	PB028	-33.1135	18.0028	134	15	2016-08-26	2016-09-09	animal	0	0	NA	NA	kudu	3	kudu	3	Natural	NA	2 adult male, 1 adult female	gentle	private road	1	NA	NA
I_00135b.JPG		PB028_Cam15_26Aug-9Sep_2016	2016-09-04	17:35:28	Ok	FALSE	debbi	PB	Spring	D6	PB028	-33.1135	18.0028	134	15	2016-08-26	2016-09-09	animal	0	0	NA	NA	kudu	3	kudu	3	Natural	NA	2 A M, 1 A F	gentle	private road	1	NA	NA
I_00142a.JPG		PB028_Cam15_26Aug-9Sep_2016	2016-09-05	18:21:53	Ok	FALSE	debbi	PB	Spring	D6	PB028	-33.1135	18.0028	134	15	2016-08-26	2016-09-09	animal	0	0	NA	NA	kudu	2	kudu	2	Natural	NA	1 SA F 1 U M	gentle	private road	1	NA	sub-adult female
I_00142b.JPG		PB028_Cam15_26Aug-9Sep_2016	2016-09-05	18:21:53	Ok	FALSE	debbi	PB	Spring	D6	PB028	-33.1135	18.0028	134	15	2016-08-26	2016-09-09	animal	0	0	NA	NA	kudu	2	kudu	2	Natural	NA	1 SA F 1 U M	gentle	private road	1	NA	sub-adult female
I_00142c.JPG		PB028_Cam15_26Aug-9Sep_2016	2016-09-05	18:21:53	Ok	FALSE	debbi	PB	Spring	D6	PB028	-33.1135	18.0028	134	15	2016-08-26	2016-09-09	animal	0	0	NA	NA	kudu	2	kudu	2	Natural	NA	1 SA F 1 U M	gentle	private road	1	NA	sub-adult female
I_00143a.JPG		PB028_Cam15_26Aug-9Sep_2016	2016-09-05	18:22:16	Ok	FALSE	debbi	PB	Spring	D6	PB028	-33.1135	18.0028	134	15	2016-08-26	2016-09-09	animal	0	0	NA	NA	kudu	1	kudu	1	Natural	NA	1 SA F - kudu 1 A M - sprongbok	gentle	private road	1	NA	sub-adult female
I_00143b.JPG		PB028_Cam15_26Aug-9Sep_2016	2016-09-05	18:22:16	Ok	FALSE	debbi	PB	Spring	D6	PB028	-33.1135	18.0028	134	15	2016-08-26	2016-09-09	animal	0	0	NA	NA	kudu	1	kudu	1	Natural	NA	1 SA F - kud 1A M - sprongbok	gentle	private road	1	NA	sub-adult female
I_00143c.JPG		PB028_Cam15_26Aug-9Sep_2016	2016-09-05	18:22:16	Ok	FALSE	debbi	PB	Spring	D6	PB028	-33.1135	18.0028	134	15	2016-08-26	2016-09-09	animal	0	0	NA	NA	kudu	1	kudu	1	Natural	NA	1 A M - springbok	gentle	private road	1	NA	sub-adult female
I_00144a.JPG		PB028_Cam15_26Aug-9Sep_2016	2016-09-05	18:22:39	Ok	FALSE	debbi	PB	Spring	D6	PB028	-33.1135	18.0028	134	15	2016-08-26	2016-09-09	animal	0	0	NA	NA	kudu	1	kudu	1	Natural	NA	NA	gentle	private road	1	NA	sub-adult female
I_00144b.JPG		PB028_Cam15_26Aug-9Sep_2016	2016-09-05	18:22:39	Ok	FALSE	debbi	PB	Spring	D6	PB028	-33.1135	18.0028	134	15	2016-08-26	2016-09-09	animal	0	0	NA	NA	kudu	2	kudu	2	Natural	NA	1 SA U	gentle	private road	1	NA	sub-adult female
I_00144c.JPG		PB028_Cam15_26Aug-9Sep_2016	2016-09-05	18:22:39	Ok	FALSE	debbi	PB	Spring	D6	PB028	-33.1135	18.0028	134	15	2016-08-26	2016-09-09	animal	0	0	NA	NA	kudu	2	kudu	2	Natural	NA	1 SA U	gentle	private road	1	NA	sub-adult female
I_00005c.JPG		PB028_Cam15_26Aug-9Sep_2016	2016-08-26	12:22:34	Ok	FALSE	debbi	PB	Winter	D6	PB028	-33.1135	18.0028	134	15	2016-08-26	2016-09-09	animal	0	0	NA	NA	ostrich	2	ostrich	2	Natural	NA	1 Juvenile	gentle	private road	1	NA	adult male
I_00005b.JPG		PB028_Cam15_26Aug-9Sep_2016	2016-08-26	12:22:34	Ok	FALSE	debbi	PB	Winter	D6	PB028	-33.1135	18.0028	134	15	2016-08-26	2016-09-09	animal	0	0	NA	NA	ostrich	3	ostrich	3	Natural	NA	2 Juveniles	gentle	private road	1	NA	adult male
I_00005a.JPG		PB028_Cam15_26Aug-9Sep_2016	2016-08-26	12:22:34	Ok	FALSE	debbi	PB	Winter	D6	PB028	-33.1135	18.0028	134	15	2016-08-26	2016-09-09	animal	0	0	NA	NA	ostrich	4	ostrich	4	Natural	NA	3 juveniles	gentle	private road	1	NA	adult male
I_00006b.JPG		PB028_Cam15_26Aug-9Sep_2016	2016-08-26	12:23:43	Ok	FALSE	debbi	PB	Winter	D6	PB028	-33.1135	18.0028	134	15	2016-08-26	2016-09-09	animal	0	0	NA	NA	ostrich	1	ostrich	1	Natural	NA	NA	gentle	private road	1	NA	adult female
I_00006a.JPG		PB028_Cam15_26Aug-9Sep_2016	2016-08-26	12:23:43	Ok	FALSE	debbi	PB	Winter	D6	PB028	-33.1135	18.0028	134	15	2016-08-26	2016-09-09	animal	0	0	NA	NA	ostrich	2	ostrich	2	Natural	NA	1 Juvenile	gentle	private road	1	NA	adult female
I_00130a.JPG		PB028_Cam15_26Aug-9Sep_2016	2016-09-04	12:24:54	Ok	FALSE	debbi	PB	Spring	D6	PB028	-33.1135	18.0028	134	15	2016-08-26	2016-09-09	animal	0	0	NA	NA	pied crow	1	pied crow	1	Natural	NA	NA	gentle	private road	1	NA	NA
I_00130b.JPG		PB028_Cam15_26Aug-9Sep_2016	2016-09-04	12:24:54	Ok	FALSE	debbi	PB	Spring	D6	PB028	-33.1135	18.0028	134	15	2016-08-26	2016-09-09	animal	0	0	NA	NA	pied crow	2	pied crow	2	Natural	NA	NA	gentle	private road	1	NA	NA
I_00156a.JPG		PB028_Cam15_26Aug-9Sep_2016	2016-09-07	11:36:41	Ok	FALSE	debbi	PB	Spring	D6	PB028	-33.1135	18.0028	134	15	2016-08-26	2016-09-09	animal	0	0	NA	NA	pied crow	1	pied crow	1	Natural	NA	NA	gentle	private road	1	NA	NA
I_00156b.JPG		PB028_Cam15_26Aug-9Sep_2016	2016-09-07	11:36:41	Ok	FALSE	debbi	PB	Spring	D6	PB028	-33.1135	18.0028	134	15	2016-08-26	2016-09-09	animal	0	0	NA	NA	pied crow	1	pied crow	1	Natural	NA	NA	gentle	private road	1	NA	NA
I_00157a.JPG		PB028_Cam15_26Aug-9Sep_2016	2016-09-07	11:37:03	Ok	FALSE	debbi	PB	Spring	D6	PB028	-33.1135	18.0028	134	15	2016-08-26	2016-09-09	animal	0	0	NA	NA	pied crow	1	pied crow	1	Natural	NA	NA	gentle	private road	1	NA	NA
I_00157b.JPG		PB028_Cam15_26Aug-9Sep_2016	2016-09-07	11:37:03	Ok	FALSE	debbi	PB	Spring	D6	PB028	-33.1135	18.0028	134	15	2016-08-26	2016-09-09	animal	0	0	NA	NA	pied crow	1	pied crow	1	Natural	NA	NA	gentle	private road	1	NA	NA
I_00157c.JPG		PB028_Cam15_26Aug-9Sep_2016	2016-09-07	11:37:03	Ok	FALSE	debbi	PB	Spring	D6	PB028	-33.1135	18.0028	134	15	2016-08-26	2016-09-09	animal	0	0	NA	NA	pied crow	1	pied crow	1	Natural	NA	NA	gentle	private road	1	NA	NA
I_00140a.JPG		PB028_Cam15_26Aug-9Sep_2016	2016-09-05	18:21:08	Ok	FALSE	debbi	PB	Spring	D6	PB028	-33.1135	18.0028	134	15	2016-08-26	2016-09-09	animal	0	0	NA	NA	springbok	1	springbok	1	Natural	NA	1 A U	gentle	private road	1	NA	NA
I_00140b.JPG		PB028_Cam15_26Aug-9Sep_2016	2016-09-05	18:21:08	Ok	FALSE	debbi	PB	Spring	D6	PB028	-33.1135	18.0028	134	15	2016-08-26	2016-09-09	animal	0	0	NA	NA	springbok	1	springbok	1	Natural	NA	NA	gentle	private road	1	NA	adult male
I_00140c.JPG		PB028_Cam15_26Aug-9Sep_2016	2016-09-05	18:21:08	Ok	FALSE	debbi	PB	Spring	D6	PB028	-33.1135	18.0028	134	15	2016-08-26	2016-09-09	animal	0	0	NA	NA	springbok	1	springbok	1	Natural	NA	NA	gentle	private road	1	NA	adult male
I_00141b.JPG		PB028_Cam15_26Aug-9Sep_2016	2016-09-05	18:21:31	Ok	FALSE	debbi	PB	Spring	D6	PB028	-33.1135	18.0028	134	15	2016-08-26	2016-09-09	animal	0	0	NA	NA	springbok	1	springbok	1	Natural	NA	1 A U	gentle	private road	1	NA	NA
I_00141c.JPG		PB028_Cam15_26Aug-9Sep_2016	2016-09-05	18:21:31	Ok	FALSE	debbi	PB	Spring	D6	PB028	-33.1135	18.0028	134	15	2016-08-26	2016-09-09	animal	0	0	NA	NA	springbok	1	springbok	1	Natural	NA	1 A U	gentle	private road	1	NA	NA
I_00143a.JPG		PB028_Cam15_26Aug-9Sep_2016	2016-09-05	18:22:16	Ok	FALSE	debbi	PB	Spring	D6	PB028	-33.1135	18.0028	134	15	2016-08-26	2016-09-09	animal	0	0	NA	NA	springbok	1	springbok	1	Natural	NA	1 SA F - kudu 1 A M - sprongbok	gentle	private road	1	NA	sub-adult female
I_00143b.JPG		PB028_Cam15_26Aug-9Sep_2016	2016-09-05	18:22:16	Ok	FALSE	debbi	PB	Spring	D6	PB028	-33.1135	18.0028	134	15	2016-08-26	2016-09-09	animal	0	0	NA	NA	springbok	1	springbok	1	Natural	NA	1 SA F - kud 1A M - sprongbok	gentle	private road	1	NA	sub-adult female
I_00143c.JPG		PB028_Cam15_26Aug-9Sep_2016	2016-09-05	18:22:16	Ok	FALSE	debbi	PB	Spring	D6	PB028	-33.1135	18.0028	134	15	2016-08-26	2016-09-09	animal	0	0	NA	NA	springbok	1	springbok	1	Natural	NA	1 A M - springbok	gentle	private road	1	NA	sub-adult female
I_00004a.JPG		PB029_Cam15_23Sep-7Oct_2016	2016-09-28	09:05:40	Ok	FALSE	Mila	PB	Spring	D6	PB029	-33.1154	18.0052	116	15	2016-09-23	2016-10-07	animal	0	0	NA	NA	common duiker	1	common duiker	1	Natural	NA	N/A	gentle	game trail	0	NA	adult male
I_00004b.JPG		PB029_Cam15_23Sep-7Oct_2016	2016-09-28	09:05:40	Ok	FALSE	Mila	PB	Spring	D6	PB029	-33.1154	18.0052	116	15	2016-09-23	2016-10-07	animal	0	0	NA	NA	common duiker	1	common duiker	1	Natural	NA	NA	gentle	game trail	0	NA	adult male
I_00004c.JPG		PB029_Cam15_23Sep-7Oct_2016	2016-09-28	09:05:40	Ok	FALSE	Mila	PB	Spring	D6	PB029	-33.1154	18.0052	116	15	2016-09-23	2016-10-07	animal	0	0	NA	NA	common duiker	1	common duiker	1	Natural	NA	NA	gentle	game trail	0	NA	adult male
I_00001a.JPG		PB029_Cam15_23Sep-7Oct_2016	2016-09-23	23:45:19	Ok	FALSE	Mila	PB	Spring	D6	PB029	-33.1154	18.0052	116	15	2016-09-23	2016-10-07	animal	0	0	NA	NA	gemsbok	1	gemsbok	1	Natural	NA	Unknown sex and age	gentle	game trail	0	NA	NA
I_00001b.JPG		PB029_Cam15_23Sep-7Oct_2016	2016-09-23	23:45:19	Ok	FALSE	Mila	PB	Spring	D6	PB029	-33.1154	18.0052	116	15	2016-09-23	2016-10-07	animal	0	0	NA	NA	gemsbok	1	gemsbok	1	Natural	NA	Unknown age and sex	gentle	game trail	0	NA	NA
I_00001c.JPG		PB029_Cam15_23Sep-7Oct_2016	2016-09-23	23:45:19	Ok	FALSE	Mila	PB	Spring	D6	PB029	-33.1154	18.0052	116	15	2016-09-23	2016-10-07	animal	0	0	NA	NA	gemsbok	1	gemsbok	1	Natural	NA	Unknown age and sex	gentle	game trail	0	NA	NA
I_00003a.JPG		PB029_Cam15_23Sep-7Oct_2016	2016-09-24	20:14:55	Ok	FALSE	Mila	PB	Spring	D6	PB029	-33.1154	18.0052	116	15	2016-09-23	2016-10-07	animal	0	0	NA	NA	gemsbok	1	gemsbok	1	Natural	NA	Unknown age and sex	gentle	game trail	0	NA	NA
I_00003b.JPG		PB029_Cam15_23Sep-7Oct_2016	2016-09-24	20:14:55	Ok	FALSE	Mila	PB	Spring	D6	PB029	-33.1154	18.0052	116	15	2016-09-23	2016-10-07	animal	0	0	NA	NA	gemsbok	1	gemsbok	1	Natural	NA	Unknown age and sex	gentle	game trail	0	NA	NA
I_00005a.JPG		PB029_Cam15_23Sep-7Oct_2016	2016-09-30	01:28:03	Ok	FALSE	Mila	PB	Spring	D6	PB029	-33.1154	18.0052	116	15	2016-09-23	2016-10-07	animal	0	0	NA	NA	gemsbok	1	gemsbok	1	Natural	NA	Unknown sex and age	gentle	game trail	0	NA	NA
I_00005b.JPG		PB029_Cam15_23Sep-7Oct_2016	2016-09-30	01:28:03	Ok	FALSE	Mila	PB	Spring	D6	PB029	-33.1154	18.0052	116	15	2016-09-23	2016-10-07	animal	0	0	NA	NA	gemsbok	1	gemsbok	1	Natural	NA	Unknown sex and age	gentle	game trail	0	NA	NA
I_00006a.JPG		PB029_Cam15_23Sep-7Oct_2016	2016-10-05	23:07:50	Ok	FALSE	Mila	PB	Spring	D6	PB029	-33.1154	18.0052	116	15	2016-09-23	2016-10-07	animal	0	0	NA	NA	gemsbok	1	gemsbok	1	Natural	NA	Unknown sex and age	gentle	game trail	0	NA	NA
I_00006c.JPG		PB029_Cam15_23Sep-7Oct_2016	2016-10-05	23:07:50	Ok	FALSE	Mila	PB	Spring	D6	PB029	-33.1154	18.0052	116	15	2016-09-23	2016-10-07	animal	0	0	NA	NA	gemsbok	1	gemsbok	1	Natural	NA	Unknown sex and age	gentle	game trail	0	NA	NA
I_00006b.JPG		PB029_Cam15_23Sep-7Oct_2016	2016-10-05	23:07:50	Ok	FALSE	Mila	PB	Spring	D6	PB029	-33.1154	18.0052	116	15	2016-09-23	2016-10-07	animal	0	0	NA	NA	gemsbok	1	gemsbok	1	Natural	NA	Unknown sex and age	gentle	game trail	0	NA	NA
I_00004b.JPG		PB033_Cam1_19-26Aug_2016	2016-08-25	08:45:44	Ok	FALSE	debbi	PB	Winter	D7	PB033	-33.1178	18.0069	92	1	2016-08-19	2016-08-26	animal	0	0	NA	NA	cape mountain zebra	1	cape mountain zebra	1	Natural	NA	NA	moderate	game trail	0	NA	adult female
I_00004c.JPG		PB033_Cam1_19-26Aug_2016	2016-08-25	08:45:44	Ok	FALSE	debbi	PB	Winter	D7	PB033	-33.1178	18.0069	92	1	2016-08-19	2016-08-26	animal	0	0	NA	NA	cape mountain zebra	1	cape mountain zebra	1	Natural	NA	NA	moderate	game trail	0	NA	adult female
I_00004a.JPG		PB033_Cam1_19-26Aug_2016	2016-08-25	08:45:44	Ok	FALSE	debbi	PB	Winter	D7	PB033	-33.1178	18.0069	92	1	2016-08-19	2016-08-26	animal	0	0	NA	NA	cape mountain zebra	1	cape mountain zebra	1	Natural	NA	1 A U	moderate	game trail	0	NA	NA
I_00005a.JPG		PB033_Cam1_19-26Aug_2016	2016-08-25	09:03:46	Ok	FALSE	debbi	PB	Winter	D7	PB033	-33.1178	18.0069	92	1	2016-08-19	2016-08-26	animal	0	0	NA	NA	cape mountain zebra	1	cape mountain zebra	1	Natural	NA	1 A U	moderate	game trail	0	NA	NA
I_00005b.JPG		PB033_Cam1_19-26Aug_2016	2016-08-25	09:03:46	Ok	FALSE	debbi	PB	Winter	D7	PB033	-33.1178	18.0069	92	1	2016-08-19	2016-08-26	animal	0	0	NA	NA	cape mountain zebra	1	cape mountain zebra	1	Natural	NA	NA	moderate	game trail	0	NA	adult male
I_00005c.JPG		PB033_Cam1_19-26Aug_2016	2016-08-25	09:03:46	Ok	FALSE	debbi	PB	Winter	D7	PB033	-33.1178	18.0069	92	1	2016-08-19	2016-08-26	animal	0	0	NA	NA	cape mountain zebra	1	cape mountain zebra	1	Natural	NA	NA	moderate	game trail	0	NA	adult male
I_00002a.JPG		PB033_Cam1_19-26Aug_2016	2016-08-22	14:43:36	Ok	FALSE	debbi	PB	Winter	D7	PB033	-33.1178	18.0069	92	1	2016-08-19	2016-08-26	animal	0	0	NA	NA	kudu	2	kudu	2	Natural	NA	1 A U	moderate	game trail	0	NA	adult male
I_00002b.JPG		PB033_Cam1_19-26Aug_2016	2016-08-22	14:43:36	Ok	FALSE	debbi	PB	Winter	D7	PB033	-33.1178	18.0069	92	1	2016-08-19	2016-08-26	animal	0	0	NA	NA	kudu	2	kudu	2	Natural	NA	1 A U	moderate	game trail	0	NA	adult male
I_00002c.JPG		PB033_Cam1_19-26Aug_2016	2016-08-22	14:43:36	Ok	FALSE	debbi	PB	Winter	D7	PB033	-33.1178	18.0069	92	1	2016-08-19	2016-08-26	animal	0	0	NA	NA	kudu	2	kudu	2	Natural	NA	1 A U	moderate	game trail	0	NA	adult male
I_00003a.JPG		PB033_Cam1_19-26Aug_2016	2016-08-22	14:44:49	Ok	FALSE	debbi	PB	Winter	D7	PB033	-33.1178	18.0069	92	1	2016-08-19	2016-08-26	animal	0	0	NA	NA	kudu	1	kudu	1	Natural	NA	NA	moderate	game trail	0	NA	adult male
I_00003b.JPG		PB033_Cam1_19-26Aug_2016	2016-08-22	14:44:49	Ok	FALSE	debbi	PB	Winter	D7	PB033	-33.1178	18.0069	92	1	2016-08-19	2016-08-26	animal	0	0	NA	NA	kudu	1	kudu	1	Natural	NA	NA	moderate	game trail	0	NA	adult male
I_00003c.JPG		PB033_Cam1_19-26Aug_2016	2016-08-22	14:44:49	Ok	FALSE	debbi	PB	Winter	D7	PB033	-33.1178	18.0069	92	1	2016-08-19	2016-08-26	animal	0	0	NA	NA	kudu	1	kudu	1	Natural	NA	NA	moderate	game trail	0	NA	adult male
I_00006a.JPG		PB033_Cam1_19-26Aug_2016	2016-08-25	09:38:04	Ok	FALSE	debbi	PB	Winter	D7	PB033	-33.1178	18.0069	92	1	2016-08-19	2016-08-26	animal	0	0	NA	NA	kudu	1	kudu	1	Natural	NA	NA	moderate	game trail	0	NA	adult female
I_00006b.JPG		PB033_Cam1_19-26Aug_2016	2016-08-25	09:38:04	Ok	FALSE	debbi	PB	Winter	D7	PB033	-33.1178	18.0069	92	1	2016-08-19	2016-08-26	animal	0	0	NA	NA	kudu	1	kudu	1	Natural	NA	NA	moderate	game trail	0	NA	adult female
I_00006c.JPG		PB033_Cam1_19-26Aug_2016	2016-08-25	09:38:04	Ok	FALSE	debbi	PB	Winter	D7	PB033	-33.1178	18.0069	92	1	2016-08-19	2016-08-26	animal	0	0	NA	NA	kudu	2	kudu	2	Natural	NA	NA	moderate	game trail	0	NA	adult female
I_00007a.JPG		PB033_Cam1_19-26Aug_2016	2016-08-25	09:38:26	Ok	FALSE	debbi	PB	Winter	D7	PB033	-33.1178	18.0069	92	1	2016-08-19	2016-08-26	animal	0	0	NA	NA	kudu	2	kudu	2	Natural	NA	NA	moderate	game trail	0	NA	adult female
I_00007b.JPG		PB033_Cam1_19-26Aug_2016	2016-08-25	09:38:26	Ok	FALSE	debbi	PB	Winter	D7	PB033	-33.1178	18.0069	92	1	2016-08-19	2016-08-26	animal	0	0	NA	NA	kudu	2	kudu	2	Natural	NA	NA	moderate	game trail	0	NA	adult female
I_00007c.JPG		PB033_Cam1_19-26Aug_2016	2016-08-25	09:38:26	Ok	FALSE	debbi	PB	Winter	D7	PB033	-33.1178	18.0069	92	1	2016-08-19	2016-08-26	animal	0	0	NA	NA	kudu	2	kudu	2	Natural	NA	NA	moderate	game trail	0	NA	adult female
I_00008a.JPG		PB033_Cam1_19-26Aug_2016	2016-08-25	09:38:48	Ok	FALSE	debbi	PB	Winter	D7	PB033	-33.1178	18.0069	92	1	2016-08-19	2016-08-26	animal	0	0	NA	NA	kudu	3	kudu	3	Natural	NA	NA	moderate	game trail	0	NA	adult female
I_00008b.JPG		PB033_Cam1_19-26Aug_2016	2016-08-25	09:38:48	Ok	FALSE	debbi	PB	Winter	D7	PB033	-33.1178	18.0069	92	1	2016-08-19	2016-08-26	animal	0	0	NA	NA	kudu	4	kudu	4	Natural	NA	NA	moderate	game trail	0	NA	adult female
I_00008c.JPG		PB033_Cam1_19-26Aug_2016	2016-08-25	09:38:48	Ok	FALSE	debbi	PB	Winter	D7	PB033	-33.1178	18.0069	92	1	2016-08-19	2016-08-26	animal	0	0	NA	NA	kudu	5	kudu	5	Natural	NA	NA	moderate	game trail	0	NA	adult female
I_00009b.JPG		PB033_Cam1_19-26Aug_2016	2016-08-25	09:39:10	Ok	FALSE	debbi	PB	Winter	D7	PB033	-33.1178	18.0069	92	1	2016-08-19	2016-08-26	animal	0	0	NA	NA	kudu	3	kudu	3	Natural	NA	NA	moderate	game trail	0	NA	adult female
I_00009c.JPG		PB033_Cam1_19-26Aug_2016	2016-08-25	09:39:10	Ok	FALSE	debbi	PB	Winter	D7	PB033	-33.1178	18.0069	92	1	2016-08-19	2016-08-26	animal	0	0	NA	NA	kudu	3	kudu	3	Natural	NA	NA	moderate	game trail	0	NA	adult female
I_00009a.JPG		PB033_Cam1_19-26Aug_2016	2016-08-25	09:39:10	Ok	FALSE	debbi	PB	Winter	D7	PB033	-33.1178	18.0069	92	1	2016-08-19	2016-08-26	animal	0	0	NA	NA	kudu	4	kudu	4	Natural	NA	NA	moderate	game trail	0	NA	adult female
I_00010a.JPG		PB033_Cam1_19-26Aug_2016	2016-08-25	09:39:56	Ok	FALSE	debbi	PB	Winter	D7	PB033	-33.1178	18.0069	92	1	2016-08-19	2016-08-26	animal	0	0	NA	NA	kudu	1	kudu	1	Natural	NA	NA	moderate	game trail	0	NA	sub-adult female
I_00010b.JPG		PB033_Cam1_19-26Aug_2016	2016-08-25	09:39:56	Ok	FALSE	debbi	PB	Winter	D7	PB033	-33.1178	18.0069	92	1	2016-08-19	2016-08-26	animal	0	0	NA	NA	kudu	1	kudu	1	Natural	NA	NA	moderate	game trail	0	NA	sub-adult female
I_00010c.JPG		PB033_Cam1_19-26Aug_2016	2016-08-25	09:39:56	Ok	FALSE	debbi	PB	Winter	D7	PB033	-33.1178	18.0069	92	1	2016-08-19	2016-08-26	animal	0	0	NA	NA	kudu	1	kudu	1	Natural	NA	NA	moderate	game trail	0	NA	sub-adult female
I_00012a.JPG		PB033_Cam1_19-26Aug_2016	2016-08-25	09:40:44	Ok	FALSE	debbi	PB	Winter	D7	PB033	-33.1178	18.0069	92	1	2016-08-19	2016-08-26	animal	0	0	NA	NA	kudu	1	kudu	1	Natural	NA	NA	moderate	game trail	0	NA	sub-adult female
I_00012b.JPG		PB033_Cam1_19-26Aug_2016	2016-08-25	09:40:44	Ok	FALSE	debbi	PB	Winter	D7	PB033	-33.1178	18.0069	92	1	2016-08-19	2016-08-26	animal	0	0	NA	NA	kudu	1	kudu	1	Natural	NA	NA	moderate	game trail	0	NA	sub-adult female
I_00012c.JPG		PB033_Cam1_19-26Aug_2016	2016-08-25	09:40:44	Ok	FALSE	debbi	PB	Winter	D7	PB033	-33.1178	18.0069	92	1	2016-08-19	2016-08-26	animal	0	0	NA	NA	kudu	1	kudu	1	Natural	NA	NA	moderate	game trail	0	NA	sub-adult female
I_00013a.JPG		PB033_Cam1_19-26Aug_2016	2016-08-25	09:41:07	Ok	FALSE	debbi	PB	Winter	D7	PB033	-33.1178	18.0069	92	1	2016-08-19	2016-08-26	animal	0	0	NA	NA	kudu	2	kudu	2	Natural	NA	NA	moderate	game trail	0	NA	sub-adult female
I_00013b.JPG		PB033_Cam1_19-26Aug_2016	2016-08-25	09:41:07	Ok	FALSE	debbi	PB	Winter	D7	PB033	-33.1178	18.0069	92	1	2016-08-19	2016-08-26	animal	0	0	NA	NA	kudu	2	kudu	2	Natural	NA	NA	moderate	game trail	0	NA	sub-adult female
I_00013c.JPG		PB033_Cam1_19-26Aug_2016	2016-08-25	09:41:07	Ok	FALSE	debbi	PB	Winter	D7	PB033	-33.1178	18.0069	92	1	2016-08-19	2016-08-26	animal	0	0	NA	NA	kudu	2	kudu	2	Natural	NA	NA	moderate	game trail	0	NA	sub-adult female
I_00014a.JPG		PB033_Cam1_19-26Aug_2016	2016-08-25	09:41:38	Ok	FALSE	debbi	PB	Winter	D7	PB033	-33.1178	18.0069	92	1	2016-08-19	2016-08-26	animal	0	0	NA	NA	kudu	1	kudu	1	Natural	NA	NA	moderate	game trail	0	NA	sub-adult female
I_00014b.JPG		PB033_Cam1_19-26Aug_2016	2016-08-25	09:41:38	Ok	FALSE	debbi	PB	Winter	D7	PB033	-33.1178	18.0069	92	1	2016-08-19	2016-08-26	animal	0	0	NA	NA	kudu	1	kudu	1	Natural	NA	NA	moderate	game trail	0	NA	sub-adult female
I_00014c.JPG		PB033_Cam1_19-26Aug_2016	2016-08-25	09:41:38	Ok	FALSE	debbi	PB	Winter	D7	PB033	-33.1178	18.0069	92	1	2016-08-19	2016-08-26	animal	0	0	NA	NA	kudu	1	kudu	1	Natural	NA	NA	moderate	game trail	0	NA	sub-adult female
I_00015b.JPG		PB033_Cam1_19-26Aug_2016	2016-08-25	09:54:24	Ok	FALSE	debbi	PB	Winter	D7	PB033	-33.1178	18.0069	92	1	2016-08-19	2016-08-26	animal	0	0	NA	NA	kudu	1	kudu	1	Natural	NA	NA	moderate	game trail	0	NA	adult female
I_00015c.JPG		PB033_Cam1_19-26Aug_2016	2016-08-25	09:54:24	Ok	FALSE	debbi	PB	Winter	D7	PB033	-33.1178	18.0069	92	1	2016-08-19	2016-08-26	animal	0	0	NA	NA	kudu	1	kudu	1	Natural	NA	NA	moderate	game trail	0	NA	adult female
I_00016a.JPG		PB033_Cam1_19-26Aug_2016	2016-08-25	09:54:53	Ok	FALSE	debbi	PB	Winter	D7	PB033	-33.1178	18.0069	92	1	2016-08-19	2016-08-26	animal	0	0	NA	NA	kudu	1	kudu	1	Natural	NA	NA	moderate	game trail	0	NA	adult female
I_00016b.JPG		PB033_Cam1_19-26Aug_2016	2016-08-25	09:54:53	Ok	FALSE	debbi	PB	Winter	D7	PB033	-33.1178	18.0069	92	1	2016-08-19	2016-08-26	animal	0	0	NA	NA	kudu	1	kudu	1	Natural	NA	NA	moderate	game trail	0	NA	adult female
I_00016c.JPG		PB033_Cam1_19-26Aug_2016	2016-08-25	09:54:53	Ok	FALSE	debbi	PB	Winter	D7	PB033	-33.1178	18.0069	92	1	2016-08-19	2016-08-26	animal	0	0	NA	NA	kudu	1	kudu	1	Natural	NA	NA	moderate	game trail	0	NA	adult female
I_00017b.JPG		PB033_Cam1_19-26Aug_2016	2016-08-25	09:55:20	Ok	FALSE	debbi	PB	Winter	D7	PB033	-33.1178	18.0069	92	1	2016-08-19	2016-08-26	animal	0	0	NA	NA	kudu	1	kudu	1	Natural	NA	NA	moderate	game trail	0	NA	adult female
I_00017a.JPG		PB033_Cam1_19-26Aug_2016	2016-08-25	09:55:20	Ok	FALSE	debbi	PB	Winter	D7	PB033	-33.1178	18.0069	92	1	2016-08-19	2016-08-26	animal	0	0	NA	NA	kudu	2	kudu	2	Natural	NA	NA	moderate	game trail	0	NA	adult female
I_00017c.JPG		PB033_Cam1_19-26Aug_2016	2016-08-25	09:55:20	Ok	FALSE	debbi	PB	Winter	D7	PB033	-33.1178	18.0069	92	1	2016-08-19	2016-08-26	animal	0	0	NA	NA	kudu	2	kudu	2	Natural	NA	NA	moderate	game trail	0	NA	adult female
I_00009b.JPG		PB035_Cam6_22Sep-6Oct_2016	2016-09-29	09:18:05	Ok	FALSE	Mila	PB	Spring	E3	PB035	-33.1256	17.9776	12	6	2016-09-22	2016-10-06	animal	0	0	NA	NA	bokmakierie	1	bokmakierie	1	Disturbed	NA	Unknown sex and age	flat	game trail	0	NA	NA
I_00009c.JPG		PB035_Cam6_22Sep-6Oct_2016	2016-09-29	09:18:05	Ok	FALSE	Mila	PB	Spring	E3	PB035	-33.1256	17.9776	12	6	2016-09-22	2016-10-06	animal	0	0	NA	NA	bokmakierie	1	bokmakierie	1	Disturbed	NA	Unknown sex and age	flat	game trail	0	NA	NA
I_00009a.JPG		PB035_Cam6_22Sep-6Oct_2016	2016-09-29	09:18:05	Ok	FALSE	Mila	PB	Spring	E3	PB035	-33.1256	17.9776	12	6	2016-09-22	2016-10-06	animal	0	0	NA	NA	bokmakierie	2	bokmakierie	2	Disturbed	NA	Unknown sex and age	flat	game trail	0	NA	NA
I_00004b.JPG		PB035_Cam6_22Sep-6Oct_2016	2016-09-27	09:34:59	Ok	FALSE	Mila	PB	Spring	E3	PB035	-33.1256	17.9776	12	6	2016-09-22	2016-10-06	animal	0	0	NA	NA	bontebok	1	bontebok	1	Disturbed	NA	1 A U	flat	game trail	0	NA	NA
I_00004c.JPG		PB035_Cam6_22Sep-6Oct_2016	2016-09-27	09:34:59	Ok	FALSE	Mila	PB	Spring	E3	PB035	-33.1256	17.9776	12	6	2016-09-22	2016-10-06	animal	0	0	NA	NA	bontebok	1	bontebok	1	Disturbed	NA	1 A U	flat	game trail	0	NA	NA
I_00005a.JPG		PB035_Cam6_22Sep-6Oct_2016	2016-09-27	09:35:26	Ok	FALSE	Mila	PB	Spring	E3	PB035	-33.1256	17.9776	12	6	2016-09-22	2016-10-06	animal	0	0	NA	NA	bontebok	1	bontebok	1	Disturbed	NA	1 A U	flat	game trail	0	NA	NA
I_00005b.JPG		PB035_Cam6_22Sep-6Oct_2016	2016-09-27	09:35:26	Ok	FALSE	Mila	PB	Spring	E3	PB035	-33.1256	17.9776	12	6	2016-09-22	2016-10-06	animal	0	0	NA	NA	bontebok	1	bontebok	1	Disturbed	NA	1 A U	flat	game trail	0	NA	NA
I_00005c.JPG		PB035_Cam6_22Sep-6Oct_2016	2016-09-27	09:35:26	Ok	FALSE	Mila	PB	Spring	E3	PB035	-33.1256	17.9776	12	6	2016-09-22	2016-10-06	animal	0	0	NA	NA	bontebok	1	bontebok	1	Disturbed	NA	1 A U	flat	game trail	0	NA	NA
I_00006a.JPG		PB035_Cam6_22Sep-6Oct_2016	2016-09-27	09:35:48	Ok	FALSE	Mila	PB	Spring	E3	PB035	-33.1256	17.9776	12	6	2016-09-22	2016-10-06	animal	0	0	NA	NA	bontebok	1	bontebok	1	Disturbed	NA	1 A U	flat	game trail	0	NA	NA
I_00006b.JPG		PB035_Cam6_22Sep-6Oct_2016	2016-09-27	09:35:48	Ok	FALSE	Mila	PB	Spring	E3	PB035	-33.1256	17.9776	12	6	2016-09-22	2016-10-06	animal	0	0	NA	NA	bontebok	1	bontebok	1	Disturbed	NA	1 A U	flat	game trail	0	NA	NA
I_00006c.JPG		PB035_Cam6_22Sep-6Oct_2016	2016-09-27	09:35:48	Ok	FALSE	Mila	PB	Spring	E3	PB035	-33.1256	17.9776	12	6	2016-09-22	2016-10-06	animal	0	0	NA	NA	bontebok	1	bontebok	1	Disturbed	NA	1 A U	flat	game trail	0	NA	NA
I_00007a.JPG		PB035_Cam6_22Sep-6Oct_2016	2016-09-27	16:26:53	Ok	FALSE	Mila	PB	Spring	E3	PB035	-33.1256	17.9776	12	6	2016-09-22	2016-10-06	animal	0	0	NA	NA	cape spurfowl	1	cape spurfowl	1	Disturbed	NA	Unknown sex and age	flat	game trail	0	NA	NA
I_00007b.JPG		PB035_Cam6_22Sep-6Oct_2016	2016-09-27	16:26:53	Ok	FALSE	Mila	PB	Spring	E3	PB035	-33.1256	17.9776	12	6	2016-09-22	2016-10-06	animal	0	0	NA	NA	cape spurfowl	1	cape spurfowl	1	Disturbed	NA	Unknown sex and age	flat	game trail	0	NA	NA
I_00007c.JPG		PB035_Cam6_22Sep-6Oct_2016	2016-09-27	16:26:53	Ok	FALSE	Mila	PB	Spring	E3	PB035	-33.1256	17.9776	12	6	2016-09-22	2016-10-06	animal	0	0	NA	NA	cape spurfowl	2	cape spurfowl	2	Disturbed	NA	Unknow sex and age	flat	game trail	0	NA	NA
I_00008a.JPG		PB035_Cam6_22Sep-6Oct_2016	2016-09-27	16:36:01	Ok	FALSE	Mila	PB	Spring	E3	PB035	-33.1256	17.9776	12	6	2016-09-22	2016-10-06	animal	0	0	NA	NA	cape spurfowl	1	cape spurfowl	1	Disturbed	NA	unknown age and sex	flat	game trail	0	NA	NA
I_00010a.JPG		PB035_Cam6_22Sep-6Oct_2016	2016-09-29	09:18:57	Ok	FALSE	Mila	PB	Spring	E3	PB035	-33.1256	17.9776	12	6	2016-09-22	2016-10-06	animal	0	0	NA	NA	cape spurfowl	1	cape spurfowl	1	Disturbed	NA	Unknown age and sex	flat	game trail	0	NA	NA
I_00010b.JPG		PB035_Cam6_22Sep-6Oct_2016	2016-09-29	09:18:57	Ok	FALSE	Mila	PB	Spring	E3	PB035	-33.1256	17.9776	12	6	2016-09-22	2016-10-06	animal	0	0	NA	NA	cape spurfowl	1	cape spurfowl	1	Disturbed	NA	unknown sex and age	flat	game trail	0	NA	NA
I_00013a.JPG		PB035_Cam6_22Sep-6Oct_2016	2016-09-30	13:09:11	Ok	FALSE	Mila	PB	Spring	E3	PB035	-33.1256	17.9776	12	6	2016-09-22	2016-10-06	animal	0	0	NA	NA	cape spurfowl	1	cape spurfowl	1	Disturbed	NA	Unknown sex and age	flat	game trail	0	NA	NA
I_00013b.JPG		PB035_Cam6_22Sep-6Oct_2016	2016-09-30	13:09:11	Ok	FALSE	Mila	PB	Spring	E3	PB035	-33.1256	17.9776	12	6	2016-09-22	2016-10-06	animal	0	0	NA	NA	cape spurfowl	1	cape spurfowl	1	Disturbed	NA	Unknown sex and age	flat	game trail	0	NA	NA
I_00013c.JPG		PB035_Cam6_22Sep-6Oct_2016	2016-09-30	13:09:11	Ok	FALSE	Mila	PB	Spring	E3	PB035	-33.1256	17.9776	12	6	2016-09-22	2016-10-06	animal	0	0	NA	NA	cape spurfowl	1	cape spurfowl	1	Disturbed	NA	Unknown sex and age	flat	game trail	0	NA	NA
I_00014a.JPG		PB035_Cam6_22Sep-6Oct_2016	2016-10-04	10:24:41	Ok	FALSE	Mila	PB	Spring	E3	PB035	-33.1256	17.9776	12	6	2016-09-22	2016-10-06	animal	0	0	NA	NA	eland	1	eland	1	Disturbed	NA	1 A U	flat	game trail	0	NA	NA
I_00014b.JPG		PB035_Cam6_22Sep-6Oct_2016	2016-10-04	10:24:41	Ok	FALSE	Mila	PB	Spring	E3	PB035	-33.1256	17.9776	12	6	2016-09-22	2016-10-06	animal	0	0	NA	NA	eland	1	eland	1	Disturbed	NA	1 A U	flat	game trail	0	NA	NA
I_00015a.JPG		PB035_Cam6_22Sep-6Oct_2016	2016-10-05	01:40:49	Ok	FALSE	Mila	PB	Spring	E3	PB035	-33.1256	17.9776	12	6	2016-09-22	2016-10-06	animal	0	0	NA	NA	eland	1	eland	1	Disturbed	NA	NA	flat	game trail	0	NA	adult female
I_00015b.JPG		PB035_Cam6_22Sep-6Oct_2016	2016-10-05	01:40:49	Ok	FALSE	Mila	PB	Spring	E3	PB035	-33.1256	17.9776	12	6	2016-09-22	2016-10-06	animal	0	0	NA	NA	eland	1	eland	1	Disturbed	NA	NA	flat	game trail	0	NA	adult female
I_00015c.JPG		PB035_Cam6_22Sep-6Oct_2016	2016-10-05	01:40:49	Ok	FALSE	Mila	PB	Spring	E3	PB035	-33.1256	17.9776	12	6	2016-09-22	2016-10-06	animal	0	0	NA	NA	eland	1	eland	1	Disturbed	NA	NA	flat	game trail	0	NA	adult female
I_00016a.JPG		PB035_Cam6_22Sep-6Oct_2016	2016-10-05	01:41:12	Ok	FALSE	Mila	PB	Spring	E3	PB035	-33.1256	17.9776	12	6	2016-09-22	2016-10-06	animal	0	0	NA	NA	eland	1	eland	1	Disturbed	NA	NA	flat	game trail	0	NA	adult female
I_00016b.JPG		PB035_Cam6_22Sep-6Oct_2016	2016-10-05	01:41:12	Ok	FALSE	Mila	PB	Spring	E3	PB035	-33.1256	17.9776	12	6	2016-09-22	2016-10-06	animal	0	0	NA	NA	eland	1	eland	1	Disturbed	NA	NA	flat	game trail	0	NA	adult female
I_00016c.JPG		PB035_Cam6_22Sep-6Oct_2016	2016-10-05	01:41:12	Ok	FALSE	Mila	PB	Spring	E3	PB035	-33.1256	17.9776	12	6	2016-09-22	2016-10-06	animal	0	0	NA	NA	eland	1	eland	1	Disturbed	NA	NA	flat	game trail	0	NA	adult female
I_00002b.JPG		PB035_Cam6_22Sep-6Oct_2016	2016-09-27	02:35:17	Ok	FALSE	Mila	PB	Spring	E3	PB035	-33.1256	17.9776	12	6	2016-09-22	2016-10-06	animal	0	0	NA	NA	large herbivore	1	large herbivore	1	Disturbed	NA	Unknown species	flat	game trail	0	NA	NA
I_00003a.JPG		PB035_Cam6_22Sep-6Oct_2016	2016-09-27	08:16:45	Ok	FALSE	Mila	PB	Spring	E3	PB035	-33.1256	17.9776	12	6	2016-09-22	2016-10-06	animal	0	0	NA	NA	ostrich	1	ostrich	1	Disturbed	NA	NA	flat	game trail	0	NA	adult male
I_00003b.JPG		PB035_Cam6_22Sep-6Oct_2016	2016-09-27	08:16:45	Ok	FALSE	Mila	PB	Spring	E3	PB035	-33.1256	17.9776	12	6	2016-09-22	2016-10-06	animal	0	0	NA	NA	ostrich	1	ostrich	1	Disturbed	NA	NA	flat	game trail	0	NA	adult male
I_00003c.JPG		PB035_Cam6_22Sep-6Oct_2016	2016-09-27	08:16:45	Ok	FALSE	Mila	PB	Spring	E3	PB035	-33.1256	17.9776	12	6	2016-09-22	2016-10-06	animal	0	0	NA	NA	ostrich	1	ostrich	1	Disturbed	NA	NA	flat	game trail	0	NA	adult female
I_00012a.JPG		PB035_Cam6_22Sep-6Oct_2016	2016-09-29	21:31:22	Ok	FALSE	Mila	PB	Spring	E3	PB035	-33.1256	17.9776	12	6	2016-09-22	2016-10-06	animal	0	0	NA	NA	porcupine	1	porcupine	1	Disturbed	NA	1 A U	flat	game trail	0	NA	NA
I_00012b.JPG		PB035_Cam6_22Sep-6Oct_2016	2016-09-29	21:31:22	Ok	FALSE	Mila	PB	Spring	E3	PB035	-33.1256	17.9776	12	6	2016-09-22	2016-10-06	animal	0	0	NA	NA	porcupine	1	porcupine	1	Disturbed	NA	1 A U	flat	game trail	0	NA	NA
I_00001a.JPG		PB038_Cam6_18-25Aug_2016	2016-08-19	15:24:04	Ok	FALSE	debbi	PB	Winter	E4	PB038	-33.122	17.9811	33	6	2016-08-18	2016-08-25	animal	0	0	NA	NA	ostrich	1	ostrich	1	Natural	NA	NA	gentle	game trail	0	NA	adult male
I_00001b.JPG		PB038_Cam6_18-25Aug_2016	2016-08-19	15:24:04	Ok	FALSE	debbi	PB	Winter	E4	PB038	-33.122	17.9811	33	6	2016-08-18	2016-08-25	animal	0	0	NA	NA	ostrich	1	ostrich	1	Natural	NA	NA	gentle	game trail	0	NA	adult male
I_00027a.JPG		PB039_Cam12_8-22Sep_2016	2016-09-17	07:31:21	Ok	FALSE	debbi	PB	Spring	E4	PB039	-33.1254	17.9861	48	12	2016-09-08	2016-09-22	animal	0	0	NA	NA	blue wildebeest	1	blue wildebeest	1	Natural	NA	1 A U	flat	game trail	0	NA	NA
I_00033a.JPG		PB039_Cam12_8-22Sep_2016	2016-09-20	19:34:47	Ok	FALSE	debbi	PB	Spring	E4	PB039	-33.1254	17.9861	48	12	2016-09-08	2016-09-22	animal	0	0	NA	NA	blue wildebeest	1	blue wildebeest	1	Natural	NA	1 A U	flat	game trail	0	NA	NA
I_00033b.JPG		PB039_Cam12_8-22Sep_2016	2016-09-20	19:34:47	Ok	FALSE	debbi	PB	Spring	E4	PB039	-33.1254	17.9861	48	12	2016-09-08	2016-09-22	animal	0	0	NA	NA	blue wildebeest	1	blue wildebeest	1	Natural	NA	1 A U	flat	game trail	0	NA	NA
I_00033c.JPG		PB039_Cam12_8-22Sep_2016	2016-09-20	19:34:47	Ok	FALSE	debbi	PB	Spring	E4	PB039	-33.1254	17.9861	48	12	2016-09-08	2016-09-22	animal	0	0	NA	NA	blue wildebeest	1	blue wildebeest	1	Natural	NA	1 A U	flat	game trail	0	NA	NA
I_00022a.JPG		PB039_Cam12_8-22Sep_2016	2016-09-13	13:12:05	Ok	FALSE	debbi	PB	Spring	E4	PB039	-33.1254	17.9861	48	12	2016-09-08	2016-09-22	animal	1	1	moving	NA	NA	0	caracal	1	Natural	NA	NA	flat	game trail	0	Unknown	NA
I_00022b.JPG		PB039_Cam12_8-22Sep_2016	2016-09-13	13:12:05	Ok	FALSE	debbi	PB	Spring	E4	PB039	-33.1254	17.9861	48	12	2016-09-08	2016-09-22	animal	1	1	moving	NA	NA	0	caracal	1	Natural	NA	NA	flat	game trail	0	Unknown	NA
I_00041a.JPG		PB039_Cam12_8-22Sep_2016	2016-09-21	23:07:09	Ok	FALSE	debbi	PB	Spring	E4	PB039	-33.1254	17.9861	48	12	2016-09-08	2016-09-22	animal	1	1	moving	NA	NA	0	caracal	1	Natural	NA	NA	flat	game trail	0	Unknown	NA
I_00041b.JPG		PB039_Cam12_8-22Sep_2016	2016-09-21	23:07:09	Ok	FALSE	debbi	PB	Spring	E4	PB039	-33.1254	17.9861	48	12	2016-09-08	2016-09-22	animal	1	1	moving	NA	NA	0	caracal	1	Natural	NA	STANDING LISTENING	flat	game trail	0	Unknown	NA
I_00041c.JPG		PB039_Cam12_8-22Sep_2016	2016-09-21	23:07:09	Ok	FALSE	debbi	PB	Spring	E4	PB039	-33.1254	17.9861	48	12	2016-09-08	2016-09-22	animal	1	1	moving	NA	NA	0	caracal	1	Natural	NA	STANDING LISTENING	flat	game trail	0	Unknown	NA
I_00031a.JPG		PB039_Cam12_8-22Sep_2016	2016-09-19	12:54:03	Ok	FALSE	debbi	PB	Spring	E4	PB039	-33.1254	17.9861	48	12	2016-09-08	2016-09-22	animal	0	0	NA	NA	eland	1	eland	1	Natural	NA	NA	flat	game trail	0	NA	adult male
I_00031b.JPG		PB039_Cam12_8-22Sep_2016	2016-09-19	12:54:03	Ok	FALSE	debbi	PB	Spring	E4	PB039	-33.1254	17.9861	48	12	2016-09-08	2016-09-22	animal	0	0	NA	NA	eland	1	eland	1	Natural	NA	NA	flat	game trail	0	NA	adult male
I_00031c.JPG		PB039_Cam12_8-22Sep_2016	2016-09-19	12:54:03	Ok	FALSE	debbi	PB	Spring	E4	PB039	-33.1254	17.9861	48	12	2016-09-08	2016-09-22	animal	0	0	NA	NA	eland	1	eland	1	Natural	NA	NA	flat	game trail	0	NA	adult male
I_00032a.JPG		PB039_Cam12_8-22Sep_2016	2016-09-19	12:55:30	Ok	FALSE	debbi	PB	Spring	E4	PB039	-33.1254	17.9861	48	12	2016-09-08	2016-09-22	animal	0	0	NA	NA	eland	1	eland	1	Natural	NA	NA	flat	game trail	0	NA	adult male
I_00032b.JPG		PB039_Cam12_8-22Sep_2016	2016-09-19	12:55:30	Ok	FALSE	debbi	PB	Spring	E4	PB039	-33.1254	17.9861	48	12	2016-09-08	2016-09-22	animal	0	0	NA	NA	eland	1	eland	1	Natural	NA	NA	flat	game trail	0	NA	adult male
I_00032c.JPG		PB039_Cam12_8-22Sep_2016	2016-09-19	12:55:30	Ok	FALSE	debbi	PB	Spring	E4	PB039	-33.1254	17.9861	48	12	2016-09-08	2016-09-22	animal	0	0	NA	NA	eland	1	eland	1	Natural	NA	NA	flat	game trail	0	NA	adult male
I_00042a.JPG		PB039_Cam12_8-22Sep_2016	2016-09-22	07:25:20	Ok	FALSE	debbi	PB	Spring	E4	PB039	-33.1254	17.9861	48	12	2016-09-08	2016-09-22	animal	0	0	NA	NA	eland	1	eland	1	Natural	NA	NA	flat	game trail	0	NA	adult male
I_00042b.JPG		PB039_Cam12_8-22Sep_2016	2016-09-22	07:25:20	Ok	FALSE	debbi	PB	Spring	E4	PB039	-33.1254	17.9861	48	12	2016-09-08	2016-09-22	animal	0	0	NA	NA	eland	1	eland	1	Natural	NA	NA	flat	game trail	0	NA	adult male
I_00042c.JPG		PB039_Cam12_8-22Sep_2016	2016-09-22	07:25:20	Ok	FALSE	debbi	PB	Spring	E4	PB039	-33.1254	17.9861	48	12	2016-09-08	2016-09-22	animal	0	0	NA	NA	eland	1	eland	1	Natural	NA	NA	flat	game trail	0	NA	adult male
I_00023c.JPG		PB039_Cam12_8-22Sep_2016	2016-09-14	15:47:16	Ok	FALSE	debbi	PB	Spring	E4	PB039	-33.1254	17.9861	48	12	2016-09-08	2016-09-22	animal	0	0	NA	NA	gemsbok	1	gemsbok	1	Natural	NA	1 A U	flat	game trail	0	NA	NA
I_00023a.JPG		PB039_Cam12_8-22Sep_2016	2016-09-14	15:47:16	Ok	FALSE	debbi	PB	Spring	E4	PB039	-33.1254	17.9861	48	12	2016-09-08	2016-09-22	animal	0	0	NA	NA	gemsbok	1	gemsbok	1	Natural	NA	1 A U	flat	game trail	0	NA	NA
I_00023b.JPG		PB039_Cam12_8-22Sep_2016	2016-09-14	15:47:16	Ok	FALSE	debbi	PB	Spring	E4	PB039	-33.1254	17.9861	48	12	2016-09-08	2016-09-22	animal	0	0	NA	NA	gemsbok	1	gemsbok	1	Natural	NA	1 A U	flat	game trail	0	NA	NA
I_00013a.JPG		PB039_Cam12_8-22Sep_2016	2016-09-10	23:44:24	Ok	FALSE	debbi	PB	Spring	E4	PB039	-33.1254	17.9861	48	12	2016-09-08	2016-09-22	animal	0	0	NA	NA	kudu	1	kudu	1	Natural	NA	NA	flat	game trail	0	NA	adult female
I_00013b.JPG		PB039_Cam12_8-22Sep_2016	2016-09-10	23:44:24	Ok	FALSE	debbi	PB	Spring	E4	PB039	-33.1254	17.9861	48	12	2016-09-08	2016-09-22	animal	0	0	NA	NA	kudu	1	kudu	1	Natural	NA	NA	flat	game trail	0	NA	adult female
I_00013c.JPG		PB039_Cam12_8-22Sep_2016	2016-09-10	23:44:24	Ok	FALSE	debbi	PB	Spring	E4	PB039	-33.1254	17.9861	48	12	2016-09-08	2016-09-22	animal	0	0	NA	NA	kudu	1	kudu	1	Natural	NA	NA	flat	game trail	0	NA	adult female
I_00014c.JPG		PB039_Cam12_8-22Sep_2016	2016-09-10	23:44:47	Ok	FALSE	debbi	PB	Spring	E4	PB039	-33.1254	17.9861	48	12	2016-09-08	2016-09-22	animal	0	0	NA	NA	kudu	3	kudu	3	Natural	NA	2 A F 1 A U	flat	game trail	0	NA	NA
I_00014a.JPG		PB039_Cam12_8-22Sep_2016	2016-09-10	23:44:47	Ok	FALSE	debbi	PB	Spring	E4	PB039	-33.1254	17.9861	48	12	2016-09-08	2016-09-22	animal	0	0	NA	NA	kudu	4	kudu	4	Natural	NA	3 A U	flat	game trail	0	NA	adult female
I_00014b.JPG		PB039_Cam12_8-22Sep_2016	2016-09-10	23:44:47	Ok	FALSE	debbi	PB	Spring	E4	PB039	-33.1254	17.9861	48	12	2016-09-08	2016-09-22	animal	0	0	NA	NA	kudu	4	kudu	4	Natural	NA	3 A U	flat	game trail	0	NA	adult female
I_00015a.JPG		PB039_Cam12_8-22Sep_2016	2016-09-10	23:45:13	Ok	FALSE	debbi	PB	Spring	E4	PB039	-33.1254	17.9861	48	12	2016-09-08	2016-09-22	animal	0	0	NA	NA	kudu	1	kudu	1	Natural	NA	1 A U	flat	game trail	0	NA	NA
I_00024a.JPG		PB039_Cam12_8-22Sep_2016	2016-09-14	16:27:48	Ok	FALSE	debbi	PB	Spring	E4	PB039	-33.1254	17.9861	48	12	2016-09-08	2016-09-22	animal	0	0	NA	NA	kudu	1	kudu	1	Natural	NA	NA	flat	game trail	0	NA	adult male
I_00024b.JPG		PB039_Cam12_8-22Sep_2016	2016-09-14	16:27:48	Ok	FALSE	debbi	PB	Spring	E4	PB039	-33.1254	17.9861	48	12	2016-09-08	2016-09-22	animal	0	0	NA	NA	kudu	1	kudu	1	Natural	NA	NA	flat	game trail	0	NA	adult male
I_00024c.JPG		PB039_Cam12_8-22Sep_2016	2016-09-14	16:27:48	Ok	FALSE	debbi	PB	Spring	E4	PB039	-33.1254	17.9861	48	12	2016-09-08	2016-09-22	animal	0	0	NA	NA	kudu	1	kudu	1	Natural	NA	NA	flat	game trail	0	NA	adult male
I_00001a.JPG		PB039_Cam12_8-22Sep_2016	2016-09-09	17:30:41	Ok	FALSE	debbi	PB	Spring	E4	PB039	-33.1254	17.9861	48	12	2016-09-08	2016-09-22	animal	0	0	NA	NA	ostrich	1	ostrich	1	Natural	NA	NA	flat	game trail	0	NA	adult male
I_00001b.JPG		PB039_Cam12_8-22Sep_2016	2016-09-09	17:30:41	Ok	FALSE	debbi	PB	Spring	E4	PB039	-33.1254	17.9861	48	12	2016-09-08	2016-09-22	animal	0	0	NA	NA	ostrich	1	ostrich	1	Natural	NA	NA	flat	game trail	0	NA	adult male
I_00001c.JPG		PB039_Cam12_8-22Sep_2016	2016-09-09	17:30:41	Ok	FALSE	debbi	PB	Spring	E4	PB039	-33.1254	17.9861	48	12	2016-09-08	2016-09-22	animal	0	0	NA	NA	ostrich	1	ostrich	1	Natural	NA	NA	flat	game trail	0	NA	adult male
I_00002a.JPG		PB039_Cam12_8-22Sep_2016	2016-09-09	17:31:56	Ok	FALSE	debbi	PB	Spring	E4	PB039	-33.1254	17.9861	48	12	2016-09-08	2016-09-22	animal	0	0	NA	NA	ostrich	1	ostrich	1	Natural	NA	NA	flat	game trail	0	NA	adult male
I_00003a.JPG		PB039_Cam12_8-22Sep_2016	2016-09-09	17:32:21	Ok	FALSE	debbi	PB	Spring	E4	PB039	-33.1254	17.9861	48	12	2016-09-08	2016-09-22	animal	0	0	NA	NA	ostrich	1	ostrich	1	Natural	NA	NA	flat	game trail	0	NA	adult male
I_00003b.JPG		PB039_Cam12_8-22Sep_2016	2016-09-09	17:32:21	Ok	FALSE	debbi	PB	Spring	E4	PB039	-33.1254	17.9861	48	12	2016-09-08	2016-09-22	animal	0	0	NA	NA	ostrich	1	ostrich	1	Natural	NA	NA	flat	game trail	0	NA	adult male
I_00003c.JPG		PB039_Cam12_8-22Sep_2016	2016-09-09	17:32:21	Ok	FALSE	debbi	PB	Spring	E4	PB039	-33.1254	17.9861	48	12	2016-09-08	2016-09-22	animal	0	0	NA	NA	ostrich	1	ostrich	1	Natural	NA	NA	flat	game trail	0	NA	adult male
I_00004a.JPG		PB039_Cam12_8-22Sep_2016	2016-09-09	17:32:46	Ok	FALSE	debbi	PB	Spring	E4	PB039	-33.1254	17.9861	48	12	2016-09-08	2016-09-22	animal	0	0	NA	NA	ostrich	1	ostrich	1	Natural	NA	NA	flat	game trail	0	NA	adult male
I_00004b.JPG		PB039_Cam12_8-22Sep_2016	2016-09-09	17:32:46	Ok	FALSE	debbi	PB	Spring	E4	PB039	-33.1254	17.9861	48	12	2016-09-08	2016-09-22	animal	0	0	NA	NA	ostrich	1	ostrich	1	Natural	NA	NA	flat	game trail	0	NA	adult male
I_00004c.JPG		PB039_Cam12_8-22Sep_2016	2016-09-09	17:32:46	Ok	FALSE	debbi	PB	Spring	E4	PB039	-33.1254	17.9861	48	12	2016-09-08	2016-09-22	animal	0	0	NA	NA	ostrich	1	ostrich	1	Natural	NA	NA	flat	game trail	0	NA	adult male
I_00005a.JPG		PB039_Cam12_8-22Sep_2016	2016-09-09	17:33:11	Ok	FALSE	debbi	PB	Spring	E4	PB039	-33.1254	17.9861	48	12	2016-09-08	2016-09-22	animal	0	0	NA	NA	ostrich	1	ostrich	1	Natural	NA	NA	flat	game trail	0	NA	adult male
I_00005b.JPG		PB039_Cam12_8-22Sep_2016	2016-09-09	17:33:11	Ok	FALSE	debbi	PB	Spring	E4	PB039	-33.1254	17.9861	48	12	2016-09-08	2016-09-22	animal	0	0	NA	NA	ostrich	1	ostrich	1	Natural	NA	NA	flat	game trail	0	NA	adult male
I_00005c.JPG		PB039_Cam12_8-22Sep_2016	2016-09-09	17:33:11	Ok	FALSE	debbi	PB	Spring	E4	PB039	-33.1254	17.9861	48	12	2016-09-08	2016-09-22	animal	0	0	NA	NA	ostrich	1	ostrich	1	Natural	NA	NA	flat	game trail	0	NA	adult male
I_00006a.JPG		PB039_Cam12_8-22Sep_2016	2016-09-09	17:33:38	Ok	FALSE	debbi	PB	Spring	E4	PB039	-33.1254	17.9861	48	12	2016-09-08	2016-09-22	animal	0	0	NA	NA	ostrich	1	ostrich	1	Natural	NA	NA	flat	game trail	0	NA	adult male
I_00006b.JPG		PB039_Cam12_8-22Sep_2016	2016-09-09	17:33:38	Ok	FALSE	debbi	PB	Spring	E4	PB039	-33.1254	17.9861	48	12	2016-09-08	2016-09-22	animal	0	0	NA	NA	ostrich	1	ostrich	1	Natural	NA	NA	flat	game trail	0	NA	adult male
I_00007a.JPG		PB039_Cam12_8-22Sep_2016	2016-09-09	17:44:10	Ok	FALSE	debbi	PB	Spring	E4	PB039	-33.1254	17.9861	48	12	2016-09-08	2016-09-22	animal	0	0	NA	NA	ostrich	1	ostrich	1	Natural	NA	NA	flat	game trail	0	NA	adult male
I_00007b.JPG		PB039_Cam12_8-22Sep_2016	2016-09-09	17:44:10	Ok	FALSE	debbi	PB	Spring	E4	PB039	-33.1254	17.9861	48	12	2016-09-08	2016-09-22	animal	0	0	NA	NA	ostrich	1	ostrich	1	Natural	NA	NA	flat	game trail	0	NA	adult male
I_00008a.JPG		PB039_Cam12_8-22Sep_2016	2016-09-09	17:45:10	Ok	FALSE	debbi	PB	Spring	E4	PB039	-33.1254	17.9861	48	12	2016-09-08	2016-09-22	animal	0	0	NA	NA	ostrich	1	ostrich	1	Natural	NA	NA	flat	game trail	0	NA	adult male
I_00008b.JPG		PB039_Cam12_8-22Sep_2016	2016-09-09	17:45:10	Ok	FALSE	debbi	PB	Spring	E4	PB039	-33.1254	17.9861	48	12	2016-09-08	2016-09-22	animal	0	0	NA	NA	ostrich	1	ostrich	1	Natural	NA	NA	flat	game trail	0	NA	adult male
I_00008c.JPG		PB039_Cam12_8-22Sep_2016	2016-09-09	17:45:10	Ok	FALSE	debbi	PB	Spring	E4	PB039	-33.1254	17.9861	48	12	2016-09-08	2016-09-22	animal	0	0	NA	NA	ostrich	1	ostrich	1	Natural	NA	NA	flat	game trail	0	NA	adult male
I_00009a.JPG		PB039_Cam12_8-22Sep_2016	2016-09-09	18:12:28	Ok	FALSE	debbi	PB	Spring	E4	PB039	-33.1254	17.9861	48	12	2016-09-08	2016-09-22	animal	0	0	NA	NA	ostrich	1	ostrich	1	Natural	NA	NA	flat	game trail	0	NA	adult female
I_00009b.JPG		PB039_Cam12_8-22Sep_2016	2016-09-09	18:12:28	Ok	FALSE	debbi	PB	Spring	E4	PB039	-33.1254	17.9861	48	12	2016-09-08	2016-09-22	animal	0	0	NA	NA	ostrich	1	ostrich	1	Natural	NA	NA	flat	game trail	0	NA	adult female
I_00009c.JPG		PB039_Cam12_8-22Sep_2016	2016-09-09	18:12:28	Ok	FALSE	debbi	PB	Spring	E4	PB039	-33.1254	17.9861	48	12	2016-09-08	2016-09-22	animal	0	0	NA	NA	ostrich	1	ostrich	1	Natural	NA	NA	flat	game trail	0	NA	adult female
I_00010a.JPG		PB039_Cam12_8-22Sep_2016	2016-09-10	10:47:19	Ok	FALSE	debbi	PB	Spring	E4	PB039	-33.1254	17.9861	48	12	2016-09-08	2016-09-22	animal	0	0	NA	NA	ostrich	1	ostrich	1	Natural	NA	NA	flat	game trail	0	NA	adult male
I_00010b.JPG		PB039_Cam12_8-22Sep_2016	2016-09-10	10:47:19	Ok	FALSE	debbi	PB	Spring	E4	PB039	-33.1254	17.9861	48	12	2016-09-08	2016-09-22	animal	0	0	NA	NA	ostrich	1	ostrich	1	Natural	NA	NA	flat	game trail	0	NA	adult male
I_00010c.JPG		PB039_Cam12_8-22Sep_2016	2016-09-10	10:47:19	Ok	FALSE	debbi	PB	Spring	E4	PB039	-33.1254	17.9861	48	12	2016-09-08	2016-09-22	animal	0	0	NA	NA	ostrich	1	ostrich	1	Natural	NA	NA	flat	game trail	0	NA	adult male
I_00011a.JPG		PB039_Cam12_8-22Sep_2016	2016-09-10	13:00:00	Ok	FALSE	debbi	PB	Spring	E4	PB039	-33.1254	17.9861	48	12	2016-09-08	2016-09-22	animal	0	0	NA	NA	ostrich	2	ostrich	2	Natural	NA	1 A F	flat	game trail	0	NA	adult male
I_00011b.JPG		PB039_Cam12_8-22Sep_2016	2016-09-10	13:00:00	Ok	FALSE	debbi	PB	Spring	E4	PB039	-33.1254	17.9861	48	12	2016-09-08	2016-09-22	animal	0	0	NA	NA	ostrich	2	ostrich	2	Natural	NA	1 A F	flat	game trail	0	NA	adult male
I_00011c.JPG		PB039_Cam12_8-22Sep_2016	2016-09-10	13:00:00	Ok	FALSE	debbi	PB	Spring	E4	PB039	-33.1254	17.9861	48	12	2016-09-08	2016-09-22	animal	0	0	NA	NA	ostrich	2	ostrich	2	Natural	NA	1A F	flat	game trail	0	NA	adult male
I_00012a.JPG		PB039_Cam12_8-22Sep_2016	2016-09-10	13:00:25	Ok	FALSE	debbi	PB	Spring	E4	PB039	-33.1254	17.9861	48	12	2016-09-08	2016-09-22	animal	0	0	NA	NA	ostrich	1	ostrich	1	Natural	NA	NA	flat	game trail	0	NA	adult female
I_00012b.JPG		PB039_Cam12_8-22Sep_2016	2016-09-10	13:00:25	Ok	FALSE	debbi	PB	Spring	E4	PB039	-33.1254	17.9861	48	12	2016-09-08	2016-09-22	animal	0	0	NA	NA	ostrich	1	ostrich	1	Natural	NA	NA	flat	game trail	0	NA	adult female
I_00017a.JPG		PB039_Cam12_8-22Sep_2016	2016-09-11	18:04:50	Ok	FALSE	debbi	PB	Spring	E4	PB039	-33.1254	17.9861	48	12	2016-09-08	2016-09-22	animal	0	0	NA	NA	ostrich	2	ostrich	2	Natural	NA	2 A F	flat	game trail	0	NA	NA
I_00017b.JPG		PB039_Cam12_8-22Sep_2016	2016-09-11	18:04:50	Ok	FALSE	debbi	PB	Spring	E4	PB039	-33.1254	17.9861	48	12	2016-09-08	2016-09-22	animal	0	0	NA	NA	ostrich	2	ostrich	2	Natural	NA	2 A F	flat	game trail	0	NA	NA
I_00017c.JPG		PB039_Cam12_8-22Sep_2016	2016-09-11	18:04:50	Ok	FALSE	debbi	PB	Spring	E4	PB039	-33.1254	17.9861	48	12	2016-09-08	2016-09-22	animal	0	0	NA	NA	ostrich	2	ostrich	2	Natural	NA	2 A F	flat	game trail	0	NA	NA
I_00018a.JPG		PB039_Cam12_8-22Sep_2016	2016-09-11	18:05:40	Ok	FALSE	debbi	PB	Spring	E4	PB039	-33.1254	17.9861	48	12	2016-09-08	2016-09-22	animal	0	0	NA	NA	ostrich	1	ostrich	1	Natural	NA	NA	flat	game trail	0	NA	adult female
I_00019c.JPG		PB039_Cam12_8-22Sep_2016	2016-09-12	11:48:00	Ok	FALSE	debbi	PB	Spring	E4	PB039	-33.1254	17.9861	48	12	2016-09-08	2016-09-22	animal	0	0	NA	NA	ostrich	1	ostrich	1	Natural	NA	1 J U	flat	game trail	0	NA	NA
I_00019a.JPG		PB039_Cam12_8-22Sep_2016	2016-09-12	11:48:00	Ok	FALSE	debbi	PB	Spring	E4	PB039	-33.1254	17.9861	48	12	2016-09-08	2016-09-22	animal	0	0	NA	NA	ostrich	2	ostrich	2	Natural	NA	2 J U	flat	game trail	0	NA	NA
I_00020a.JPG		PB039_Cam12_8-22Sep_2016	2016-09-12	11:48:25	Ok	FALSE	debbi	PB	Spring	E4	PB039	-33.1254	17.9861	48	12	2016-09-08	2016-09-22	animal	0	0	NA	NA	ostrich	1	ostrich	1	Natural	NA	NA	flat	game trail	0	NA	adult female
I_00020b.JPG		PB039_Cam12_8-22Sep_2016	2016-09-12	11:48:25	Ok	FALSE	debbi	PB	Spring	E4	PB039	-33.1254	17.9861	48	12	2016-09-08	2016-09-22	animal	0	0	NA	NA	ostrich	1	ostrich	1	Natural	NA	1 J U	flat	game trail	0	NA	NA
I_00021a.JPG		PB039_Cam12_8-22Sep_2016	2016-09-12	18:22:00	Ok	FALSE	debbi	PB	Spring	E4	PB039	-33.1254	17.9861	48	12	2016-09-08	2016-09-22	animal	0	0	NA	NA	ostrich	1	ostrich	1	Natural	NA	NA	flat	game trail	0	NA	adult female
I_00021b.JPG		PB039_Cam12_8-22Sep_2016	2016-09-12	18:22:00	Ok	FALSE	debbi	PB	Spring	E4	PB039	-33.1254	17.9861	48	12	2016-09-08	2016-09-22	animal	0	0	NA	NA	ostrich	1	ostrich	1	Natural	NA	NA	flat	game trail	0	NA	adult female
I_00021c.JPG		PB039_Cam12_8-22Sep_2016	2016-09-12	18:22:00	Ok	FALSE	debbi	PB	Spring	E4	PB039	-33.1254	17.9861	48	12	2016-09-08	2016-09-22	animal	0	0	NA	NA	ostrich	1	ostrich	1	Natural	NA	NA	flat	game trail	0	NA	adult female
I_00025a.JPG		PB039_Cam12_8-22Sep_2016	2016-09-14	18:00:32	Ok	FALSE	debbi	PB	Spring	E4	PB039	-33.1254	17.9861	48	12	2016-09-08	2016-09-22	animal	0	0	NA	NA	ostrich	1	ostrich	1	Natural	NA	NA	flat	game trail	0	NA	adult female
I_00025b.JPG		PB039_Cam12_8-22Sep_2016	2016-09-14	18:00:32	Ok	FALSE	debbi	PB	Spring	E4	PB039	-33.1254	17.9861	48	12	2016-09-08	2016-09-22	animal	0	0	NA	NA	ostrich	1	ostrich	1	Natural	NA	NA	flat	game trail	0	NA	adult female
I_00026a.JPG		PB039_Cam12_8-22Sep_2016	2016-09-15	17:28:07	Ok	FALSE	debbi	PB	Spring	E4	PB039	-33.1254	17.9861	48	12	2016-09-08	2016-09-22	animal	0	0	NA	NA	ostrich	1	ostrich	1	Natural	NA	NA	flat	game trail	0	NA	adult female
I_00026b.JPG		PB039_Cam12_8-22Sep_2016	2016-09-15	17:28:07	Ok	FALSE	debbi	PB	Spring	E4	PB039	-33.1254	17.9861	48	12	2016-09-08	2016-09-22	animal	0	0	NA	NA	ostrich	1	ostrich	1	Natural	NA	NA	flat	game trail	0	NA	adult female
I_00028a.JPG		PB039_Cam12_8-22Sep_2016	2016-09-17	09:56:39	Ok	FALSE	debbi	PB	Spring	E4	PB039	-33.1254	17.9861	48	12	2016-09-08	2016-09-22	animal	0	0	NA	NA	ostrich	1	ostrich	1	Natural	NA	NA	flat	game trail	0	NA	adult female
I_00028b.JPG		PB039_Cam12_8-22Sep_2016	2016-09-17	09:56:39	Ok	FALSE	debbi	PB	Spring	E4	PB039	-33.1254	17.9861	48	12	2016-09-08	2016-09-22	animal	0	0	NA	NA	ostrich	1	ostrich	1	Natural	NA	NA	flat	game trail	0	NA	adult female
I_00028c.JPG		PB039_Cam12_8-22Sep_2016	2016-09-17	09:56:39	Ok	FALSE	debbi	PB	Spring	E4	PB039	-33.1254	17.9861	48	12	2016-09-08	2016-09-22	animal	0	0	NA	NA	ostrich	1	ostrich	1	Natural	NA	NA	flat	game trail	0	NA	adult female
I_00029a.JPG		PB039_Cam12_8-22Sep_2016	2016-09-18	18:26:08	Ok	FALSE	debbi	PB	Spring	E4	PB039	-33.1254	17.9861	48	12	2016-09-08	2016-09-22	animal	0	0	NA	NA	ostrich	1	ostrich	1	Natural	NA	NA	flat	game trail	0	NA	adult male
I_00029b.JPG		PB039_Cam12_8-22Sep_2016	2016-09-18	18:26:08	Ok	FALSE	debbi	PB	Spring	E4	PB039	-33.1254	17.9861	48	12	2016-09-08	2016-09-22	animal	0	0	NA	NA	ostrich	1	ostrich	1	Natural	NA	NA	flat	game trail	0	NA	adult male
I_00029c.JPG		PB039_Cam12_8-22Sep_2016	2016-09-18	18:26:08	Ok	FALSE	debbi	PB	Spring	E4	PB039	-33.1254	17.9861	48	12	2016-09-08	2016-09-22	animal	0	0	NA	NA	ostrich	1	ostrich	1	Natural	NA	NA	flat	game trail	0	NA	adult male
I_00030a.JPG		PB039_Cam12_8-22Sep_2016	2016-09-18	18:29:16	Ok	FALSE	debbi	PB	Spring	E4	PB039	-33.1254	17.9861	48	12	2016-09-08	2016-09-22	animal	0	0	NA	NA	ostrich	1	ostrich	1	Natural	NA	NA	flat	game trail	0	NA	adult female
I_00030b.JPG		PB039_Cam12_8-22Sep_2016	2016-09-18	18:29:16	Ok	FALSE	debbi	PB	Spring	E4	PB039	-33.1254	17.9861	48	12	2016-09-08	2016-09-22	animal	0	0	NA	NA	ostrich	1	ostrich	1	Natural	NA	NA	flat	game trail	0	NA	adult female
I_00030c.JPG		PB039_Cam12_8-22Sep_2016	2016-09-18	18:29:16	Ok	FALSE	debbi	PB	Spring	E4	PB039	-33.1254	17.9861	48	12	2016-09-08	2016-09-22	animal	0	0	NA	NA	ostrich	1	ostrich	1	Natural	NA	NA	flat	game trail	0	NA	adult female
I_00034a.JPG		PB039_Cam12_8-22Sep_2016	2016-09-21	15:01:54	Ok	FALSE	debbi	PB	Spring	E4	PB039	-33.1254	17.9861	48	12	2016-09-08	2016-09-22	animal	0	0	NA	NA	ostrich	1	ostrich	1	Natural	NA	NA	flat	game trail	0	NA	adult female
I_00034b.JPG		PB039_Cam12_8-22Sep_2016	2016-09-21	15:01:54	Ok	FALSE	debbi	PB	Spring	E4	PB039	-33.1254	17.9861	48	12	2016-09-08	2016-09-22	animal	0	0	NA	NA	ostrich	1	ostrich	1	Natural	NA	NA	flat	game trail	0	NA	adult female
I_00034c.JPG		PB039_Cam12_8-22Sep_2016	2016-09-21	15:01:54	Ok	FALSE	debbi	PB	Spring	E4	PB039	-33.1254	17.9861	48	12	2016-09-08	2016-09-22	animal	0	0	NA	NA	ostrich	1	ostrich	1	Natural	NA	NA	flat	game trail	0	NA	adult female
I_00035a.JPG		PB039_Cam12_8-22Sep_2016	2016-09-21	15:05:25	Ok	FALSE	debbi	PB	Spring	E4	PB039	-33.1254	17.9861	48	12	2016-09-08	2016-09-22	animal	0	0	NA	NA	ostrich	1	ostrich	1	Natural	NA	NA	flat	game trail	0	NA	adult female
I_00035b.JPG		PB039_Cam12_8-22Sep_2016	2016-09-21	15:05:25	Ok	FALSE	debbi	PB	Spring	E4	PB039	-33.1254	17.9861	48	12	2016-09-08	2016-09-22	animal	0	0	NA	NA	ostrich	1	ostrich	1	Natural	NA	NA	flat	game trail	0	NA	adult female
I_00035c.JPG		PB039_Cam12_8-22Sep_2016	2016-09-21	15:05:25	Ok	FALSE	debbi	PB	Spring	E4	PB039	-33.1254	17.9861	48	12	2016-09-08	2016-09-22	animal	0	0	NA	NA	ostrich	1	ostrich	1	Natural	NA	NA	flat	game trail	0	NA	adult female
I_00036a.JPG		PB039_Cam12_8-22Sep_2016	2016-09-21	15:08:08	Ok	FALSE	debbi	PB	Spring	E4	PB039	-33.1254	17.9861	48	12	2016-09-08	2016-09-22	animal	0	0	NA	NA	ostrich	1	ostrich	1	Natural	NA	NA	flat	game trail	0	NA	adult male
I_00036b.JPG		PB039_Cam12_8-22Sep_2016	2016-09-21	15:08:08	Ok	FALSE	debbi	PB	Spring	E4	PB039	-33.1254	17.9861	48	12	2016-09-08	2016-09-22	animal	0	0	NA	NA	ostrich	1	ostrich	1	Natural	NA	NA	flat	game trail	0	NA	adult male
I_00036c.JPG		PB039_Cam12_8-22Sep_2016	2016-09-21	15:08:08	Ok	FALSE	debbi	PB	Spring	E4	PB039	-33.1254	17.9861	48	12	2016-09-08	2016-09-22	animal	0	0	NA	NA	ostrich	1	ostrich	1	Natural	NA	NA	flat	game trail	0	NA	adult male
I_00037a.JPG		PB039_Cam12_8-22Sep_2016	2016-09-21	15:15:42	Ok	FALSE	debbi	PB	Spring	E4	PB039	-33.1254	17.9861	48	12	2016-09-08	2016-09-22	animal	0	0	NA	NA	ostrich	2	ostrich	2	Natural	NA	1 A F	flat	game trail	0	NA	adult male
I_00037b.JPG		PB039_Cam12_8-22Sep_2016	2016-09-21	15:15:42	Ok	FALSE	debbi	PB	Spring	E4	PB039	-33.1254	17.9861	48	12	2016-09-08	2016-09-22	animal	0	0	NA	NA	ostrich	2	ostrich	2	Natural	NA	1A F	flat	game trail	0	NA	adult male
I_00037c.JPG		PB039_Cam12_8-22Sep_2016	2016-09-21	15:15:42	Ok	FALSE	debbi	PB	Spring	E4	PB039	-33.1254	17.9861	48	12	2016-09-08	2016-09-22	animal	0	0	NA	NA	ostrich	2	ostrich	2	Natural	NA	1 A F	flat	game trail	0	NA	adult male
I_00038a.JPG		PB039_Cam12_8-22Sep_2016	2016-09-21	15:24:02	Ok	FALSE	debbi	PB	Spring	E4	PB039	-33.1254	17.9861	48	12	2016-09-08	2016-09-22	animal	0	0	NA	NA	ostrich	1	ostrich	1	Natural	NA	NA	flat	game trail	0	NA	adult female
I_00038b.JPG		PB039_Cam12_8-22Sep_2016	2016-09-21	15:24:02	Ok	FALSE	debbi	PB	Spring	E4	PB039	-33.1254	17.9861	48	12	2016-09-08	2016-09-22	animal	0	0	NA	NA	ostrich	1	ostrich	1	Natural	NA	NA	flat	game trail	0	NA	adult female
I_00038c.JPG		PB039_Cam12_8-22Sep_2016	2016-09-21	15:24:02	Ok	FALSE	debbi	PB	Spring	E4	PB039	-33.1254	17.9861	48	12	2016-09-08	2016-09-22	animal	0	0	NA	NA	ostrich	1	ostrich	1	Natural	NA	NA	flat	game trail	0	NA	adult female
I_00039a.JPG		PB039_Cam12_8-22Sep_2016	2016-09-21	15:57:26	Ok	FALSE	debbi	PB	Spring	E4	PB039	-33.1254	17.9861	48	12	2016-09-08	2016-09-22	animal	0	0	NA	NA	ostrich	1	ostrich	1	Natural	NA	1 A U	flat	game trail	0	NA	NA
I_00039b.JPG		PB039_Cam12_8-22Sep_2016	2016-09-21	15:57:26	Ok	FALSE	debbi	PB	Spring	E4	PB039	-33.1254	17.9861	48	12	2016-09-08	2016-09-22	animal	0	0	NA	NA	ostrich	1	ostrich	1	Natural	NA	1 A U	flat	game trail	0	NA	NA
I_00039c.JPG		PB039_Cam12_8-22Sep_2016	2016-09-21	15:57:26	Ok	FALSE	debbi	PB	Spring	E4	PB039	-33.1254	17.9861	48	12	2016-09-08	2016-09-22	animal	0	0	NA	NA	ostrich	1	ostrich	1	Natural	NA	1 A U	flat	game trail	0	NA	NA
I_00040a.JPG		PB039_Cam12_8-22Sep_2016	2016-09-21	16:06:06	Ok	FALSE	debbi	PB	Spring	E4	PB039	-33.1254	17.9861	48	12	2016-09-08	2016-09-22	animal	0	0	NA	NA	ostrich	1	ostrich	1	Natural	NA	NA	flat	game trail	0	NA	adult male
I_00040b.JPG		PB039_Cam12_8-22Sep_2016	2016-09-21	16:06:06	Ok	FALSE	debbi	PB	Spring	E4	PB039	-33.1254	17.9861	48	12	2016-09-08	2016-09-22	animal	0	0	NA	NA	ostrich	1	ostrich	1	Natural	NA	NA	flat	game trail	0	NA	adult male
I_00040c.JPG		PB039_Cam12_8-22Sep_2016	2016-09-21	16:06:06	Ok	FALSE	debbi	PB	Spring	E4	PB039	-33.1254	17.9861	48	12	2016-09-08	2016-09-22	animal	0	0	NA	NA	ostrich	1	ostrich	1	Natural	NA	NA	flat	game trail	0	NA	adult male
I_00043a.JPG		PB039_Cam12_8-22Sep_2016	2016-09-22	09:23:57	Ok	FALSE	debbi	PB	Spring	E4	PB039	-33.1254	17.9861	48	12	2016-09-08	2016-09-22	animal	0	0	NA	NA	ostrich	1	ostrich	1	Natural	NA	NA	flat	game trail	0	NA	adult male
I_00043b.JPG		PB039_Cam12_8-22Sep_2016	2016-09-22	09:23:57	Ok	FALSE	debbi	PB	Spring	E4	PB039	-33.1254	17.9861	48	12	2016-09-08	2016-09-22	animal	0	0	NA	NA	ostrich	1	ostrich	1	Natural	NA	NA	flat	game trail	0	NA	adult male
I_00043c.JPG		PB039_Cam12_8-22Sep_2016	2016-09-22	09:23:57	Ok	FALSE	debbi	PB	Spring	E4	PB039	-33.1254	17.9861	48	12	2016-09-08	2016-09-22	animal	0	0	NA	NA	ostrich	1	ostrich	1	Natural	NA	NA	flat	game trail	0	NA	adult male
I_00004a.JPG		PB042_Cam12_25Aug-8Sep_2016	2016-08-29	07:03:05	Ok	FALSE	debbi	PB	Winter	E5	PB042	-33.1264	17.9913	40	12	2016-08-25	2016-09-08	animal	0	0	NA	NA	blue wildebeest	1	blue wildebeest	1	Natural	NA	1 A U	flat	game trail	0	NA	NA
I_00005a.JPG		PB042_Cam12_25Aug-8Sep_2016	2016-08-30	23:10:06	Ok	FALSE	debbi	PB	Winter	E5	PB042	-33.1264	17.9913	40	12	2016-08-25	2016-09-08	animal	0	0	NA	NA	blue wildebeest	1	blue wildebeest	1	Natural	NA	1 A U	flat	game trail	0	NA	NA
I_00005b.JPG		PB042_Cam12_25Aug-8Sep_2016	2016-08-30	23:10:06	Ok	FALSE	debbi	PB	Winter	E5	PB042	-33.1264	17.9913	40	12	2016-08-25	2016-09-08	animal	0	0	NA	NA	blue wildebeest	1	blue wildebeest	1	Natural	NA	1 A U	flat	game trail	0	NA	NA
I_00005c.JPG		PB042_Cam12_25Aug-8Sep_2016	2016-08-30	23:10:06	Ok	FALSE	debbi	PB	Winter	E5	PB042	-33.1264	17.9913	40	12	2016-08-25	2016-09-08	animal	0	0	NA	NA	blue wildebeest	1	blue wildebeest	1	Natural	NA	1 A U	flat	game trail	0	NA	NA
I_00001a.JPG		PB042_Cam12_25Aug-8Sep_2016	2016-08-26	10:42:00	Ok	FALSE	debbi	PB	Winter	E5	PB042	-33.1264	17.9913	40	12	2016-08-25	2016-09-08	animal	0	0	NA	NA	cape spurfowl	1	cape spurfowl	1	Natural	NA	NA	flat	game trail	0	NA	NA
I_00001c.JPG		PB042_Cam12_25Aug-8Sep_2016	2016-08-26	10:42:00	Ok	FALSE	debbi	PB	Winter	E5	PB042	-33.1264	17.9913	40	12	2016-08-25	2016-09-08	animal	0	0	NA	NA	cape spurfowl	1	cape spurfowl	1	Natural	NA	NA	flat	game trail	0	NA	NA
I_00001b.JPG		PB042_Cam12_25Aug-8Sep_2016	2016-08-26	10:42:00	Ok	FALSE	debbi	PB	Winter	E5	PB042	-33.1264	17.9913	40	12	2016-08-25	2016-09-08	animal	0	0	NA	NA	cape spurfowl	2	cape spurfowl	2	Natural	NA	NA	flat	game trail	0	NA	NA
I_00002a.JPG		PB042_Cam12_25Aug-8Sep_2016	2016-08-26	10:43:38	Ok	FALSE	debbi	PB	Winter	E5	PB042	-33.1264	17.9913	40	12	2016-08-25	2016-09-08	animal	0	0	NA	NA	cape spurfowl	1	cape spurfowl	1	Natural	NA	NA	flat	game trail	0	NA	NA
I_00002b.JPG		PB042_Cam12_25Aug-8Sep_2016	2016-08-26	10:43:38	Ok	FALSE	debbi	PB	Winter	E5	PB042	-33.1264	17.9913	40	12	2016-08-25	2016-09-08	animal	0	0	NA	NA	cape spurfowl	2	cape spurfowl	2	Natural	NA	NA	flat	game trail	0	NA	NA
I_00002c.JPG		PB042_Cam12_25Aug-8Sep_2016	2016-08-26	10:43:38	Ok	FALSE	debbi	PB	Winter	E5	PB042	-33.1264	17.9913	40	12	2016-08-25	2016-09-08	animal	0	0	NA	NA	cape spurfowl	2	cape spurfowl	2	Natural	NA	NA	flat	game trail	0	NA	NA
I_00003a.JPG		PB042_Cam12_25Aug-8Sep_2016	2016-08-26	10:44:00	Ok	FALSE	debbi	PB	Winter	E5	PB042	-33.1264	17.9913	40	12	2016-08-25	2016-09-08	animal	0	0	NA	NA	cape spurfowl	1	cape spurfowl	1	Natural	NA	NA	flat	game trail	0	NA	NA
I_00006a.JPG		PB042_Cam12_25Aug-8Sep_2016	2016-08-31	08:57:57	Ok	FALSE	debbi	PB	Winter	E5	PB042	-33.1264	17.9913	40	12	2016-08-25	2016-09-08	animal	0	0	NA	NA	cape spurfowl	1	cape spurfowl	1	Natural	NA	NA	flat	game trail	0	NA	NA
I_00006b.JPG		PB042_Cam12_25Aug-8Sep_2016	2016-08-31	08:57:57	Ok	FALSE	debbi	PB	Winter	E5	PB042	-33.1264	17.9913	40	12	2016-08-25	2016-09-08	animal	0	0	NA	NA	cape spurfowl	1	cape spurfowl	1	Natural	NA	NA	flat	game trail	0	NA	NA
I_00006c.JPG		PB042_Cam12_25Aug-8Sep_2016	2016-08-31	08:57:57	Ok	FALSE	debbi	PB	Winter	E5	PB042	-33.1264	17.9913	40	12	2016-08-25	2016-09-08	animal	0	0	NA	NA	cape spurfowl	1	cape spurfowl	1	Natural	NA	NA	flat	game trail	0	NA	NA
I_00008a.JPG		PB042_Cam12_25Aug-8Sep_2016	2016-09-07	12:05:17	Ok	FALSE	debbi	PB	Spring	E5	PB042	-33.1264	17.9913	40	12	2016-08-25	2016-09-08	animal	0	0	NA	NA	cape spurfowl	1	cape spurfowl	1	Natural	NA	NA	flat	game trail	0	NA	NA
I_00008b.JPG		PB042_Cam12_25Aug-8Sep_2016	2016-09-07	12:05:17	Ok	FALSE	debbi	PB	Spring	E5	PB042	-33.1264	17.9913	40	12	2016-08-25	2016-09-08	animal	0	0	NA	NA	cape spurfowl	1	cape spurfowl	1	Natural	NA	NA	flat	game trail	0	NA	NA
I_00008c.JPG		PB042_Cam12_25Aug-8Sep_2016	2016-09-07	12:05:17	Ok	FALSE	debbi	PB	Spring	E5	PB042	-33.1264	17.9913	40	12	2016-08-25	2016-09-08	animal	0	0	NA	NA	cape spurfowl	1	cape spurfowl	1	Natural	NA	NA	flat	game trail	0	NA	NA
I_00020a.JPG		PB045_Cam15_19-26Aug_2016	2016-08-24	13:56:38	Ok	FALSE	debbi	PB	Winter	E6	PB045	-33.1238	18.0018	57	15	2016-08-19	2016-08-26	animal	0	0	NA	NA	angulate tortoise	1	angulate tortoise	1	Disturbed	NA	NA	flat	management track	2	NA	NA
I_00020b.JPG		PB045_Cam15_19-26Aug_2016	2016-08-24	13:56:38	Ok	FALSE	debbi	PB	Winter	E6	PB045	-33.1238	18.0018	57	15	2016-08-19	2016-08-26	animal	0	0	NA	NA	angulate tortoise	1	angulate tortoise	1	Disturbed	NA	NA	flat	management track	2	NA	NA
I_00020c.JPG		PB045_Cam15_19-26Aug_2016	2016-08-24	13:56:38	Ok	FALSE	debbi	PB	Winter	E6	PB045	-33.1238	18.0018	57	15	2016-08-19	2016-08-26	animal	0	0	NA	NA	angulate tortoise	1	angulate tortoise	1	Disturbed	NA	NA	flat	management track	2	NA	NA
I_00009b.JPG		PB045_Cam15_19-26Aug_2016	2016-08-20	15:18:34	Ok	FALSE	debbi	PB	Winter	E6	PB045	-33.1238	18.0018	57	15	2016-08-19	2016-08-26	animal	0	0	NA	NA	cape spurfowl	1	cape spurfowl	1	Disturbed	NA	NA	flat	management track	2	NA	NA
I_00009a.JPG		PB045_Cam15_19-26Aug_2016	2016-08-20	15:18:34	Ok	FALSE	debbi	PB	Winter	E6	PB045	-33.1238	18.0018	57	15	2016-08-19	2016-08-26	animal	0	0	NA	NA	cape spurfowl	2	cape spurfowl	2	Disturbed	NA	NA	flat	management track	2	NA	NA
I_00010a.JPG		PB045_Cam15_19-26Aug_2016	2016-08-20	15:20:29	Ok	FALSE	debbi	PB	Winter	E6	PB045	-33.1238	18.0018	57	15	2016-08-19	2016-08-26	animal	0	0	NA	NA	cape spurfowl	1	cape spurfowl	1	Disturbed	NA	NA	flat	management track	2	NA	NA
I_00011a.JPG		PB045_Cam15_19-26Aug_2016	2016-08-20	16:17:06	Ok	FALSE	debbi	PB	Winter	E6	PB045	-33.1238	18.0018	57	15	2016-08-19	2016-08-26	animal	0	0	NA	NA	cape spurfowl	1	cape spurfowl	1	Disturbed	NA	NA	flat	management track	2	NA	NA
I_00011c.JPG		PB045_Cam15_19-26Aug_2016	2016-08-20	16:17:06	Ok	FALSE	debbi	PB	Winter	E6	PB045	-33.1238	18.0018	57	15	2016-08-19	2016-08-26	animal	0	0	NA	NA	cape spurfowl	1	cape spurfowl	1	Disturbed	NA	NA	flat	management track	2	NA	NA
I_00012a.JPG		PB045_Cam15_19-26Aug_2016	2016-08-20	16:23:14	Ok	FALSE	debbi	PB	Winter	E6	PB045	-33.1238	18.0018	57	15	2016-08-19	2016-08-26	animal	0	0	NA	NA	cape spurfowl	1	cape spurfowl	1	Disturbed	NA	NA	flat	management track	2	NA	NA
I_00012b.JPG		PB045_Cam15_19-26Aug_2016	2016-08-20	16:23:14	Ok	FALSE	debbi	PB	Winter	E6	PB045	-33.1238	18.0018	57	15	2016-08-19	2016-08-26	animal	0	0	NA	NA	cape spurfowl	1	cape spurfowl	1	Disturbed	NA	NA	flat	management track	2	NA	NA
I_00012c.JPG		PB045_Cam15_19-26Aug_2016	2016-08-20	16:23:14	Ok	FALSE	debbi	PB	Winter	E6	PB045	-33.1238	18.0018	57	15	2016-08-19	2016-08-26	animal	0	0	NA	NA	cape spurfowl	1	cape spurfowl	1	Disturbed	NA	NA	flat	management track	2	NA	NA
I_00014a.JPG		PB045_Cam15_19-26Aug_2016	2016-08-20	16:25:23	Ok	FALSE	debbi	PB	Winter	E6	PB045	-33.1238	18.0018	57	15	2016-08-19	2016-08-26	animal	0	0	NA	NA	cape spurfowl	1	cape spurfowl	1	Disturbed	NA	NA	flat	management track	2	NA	NA
I_00014b.JPG		PB045_Cam15_19-26Aug_2016	2016-08-20	16:25:23	Ok	FALSE	debbi	PB	Winter	E6	PB045	-33.1238	18.0018	57	15	2016-08-19	2016-08-26	animal	0	0	NA	NA	cape spurfowl	1	cape spurfowl	1	Disturbed	NA	NA	flat	management track	2	NA	NA
I_00014c.JPG		PB045_Cam15_19-26Aug_2016	2016-08-20	16:25:23	Ok	FALSE	debbi	PB	Winter	E6	PB045	-33.1238	18.0018	57	15	2016-08-19	2016-08-26	animal	0	0	NA	NA	cape spurfowl	1	cape spurfowl	1	Disturbed	NA	NA	flat	management track	2	NA	NA
I_00015a.JPG		PB045_Cam15_19-26Aug_2016	2016-08-20	16:48:02	Ok	FALSE	debbi	PB	Winter	E6	PB045	-33.1238	18.0018	57	15	2016-08-19	2016-08-26	animal	0	0	NA	NA	cape spurfowl	1	cape spurfowl	1	Disturbed	NA	NA	flat	management track	2	NA	NA
I_00015b.JPG		PB045_Cam15_19-26Aug_2016	2016-08-20	16:48:02	Ok	FALSE	debbi	PB	Winter	E6	PB045	-33.1238	18.0018	57	15	2016-08-19	2016-08-26	animal	0	0	NA	NA	cape spurfowl	1	cape spurfowl	1	Disturbed	NA	NA	flat	management track	2	NA	NA
I_00015c.JPG		PB045_Cam15_19-26Aug_2016	2016-08-20	16:48:02	Ok	FALSE	debbi	PB	Winter	E6	PB045	-33.1238	18.0018	57	15	2016-08-19	2016-08-26	animal	0	0	NA	NA	cape spurfowl	1	cape spurfowl	1	Disturbed	NA	NA	flat	management track	2	NA	NA
I_00016a.JPG		PB045_Cam15_19-26Aug_2016	2016-08-20	17:11:28	Ok	FALSE	debbi	PB	Winter	E6	PB045	-33.1238	18.0018	57	15	2016-08-19	2016-08-26	animal	0	0	NA	NA	cape spurfowl	1	cape spurfowl	1	Disturbed	NA	NA	flat	management track	2	NA	NA
I_00017b.JPG		PB045_Cam15_19-26Aug_2016	2016-08-20	17:45:48	Ok	FALSE	debbi	PB	Winter	E6	PB045	-33.1238	18.0018	57	15	2016-08-19	2016-08-26	animal	0	0	NA	NA	cape spurfowl	1	cape spurfowl	1	Disturbed	NA	NA	flat	management track	2	NA	NA
I_00017a.JPG		PB045_Cam15_19-26Aug_2016	2016-08-20	17:45:48	Ok	FALSE	debbi	PB	Winter	E6	PB045	-33.1238	18.0018	57	15	2016-08-19	2016-08-26	animal	0	0	NA	NA	cape spurfowl	2	cape spurfowl	2	Disturbed	NA	NA	flat	management track	2	NA	NA
I_00019a.JPG		PB045_Cam15_19-26Aug_2016	2016-08-22	16:11:30	Ok	FALSE	debbi	PB	Winter	E6	PB045	-33.1238	18.0018	57	15	2016-08-19	2016-08-26	animal	0	0	NA	NA	cape spurfowl	1	cape spurfowl	1	Disturbed	NA	NA	flat	management track	2	NA	NA
I_00021a.JPG		PB045_Cam15_19-26Aug_2016	2016-08-24	15:30:31	Ok	FALSE	debbi	PB	Winter	E6	PB045	-33.1238	18.0018	57	15	2016-08-19	2016-08-26	animal	0	0	NA	NA	cape spurfowl	2	cape spurfowl	2	Disturbed	NA	NA	flat	management track	2	NA	NA
I_00004b.JPG		PB045_Cam15_19-26Aug_2016	2016-08-19	17:24:30	Ok	FALSE	debbi	PB	Winter	E6	PB045	-33.1238	18.0018	57	15	2016-08-19	2016-08-26	animal	0	0	NA	NA	cattle egret	2	cattle egret	2	Disturbed	NA	NA	flat	management track	2	NA	NA
I_00004c.JPG		PB045_Cam15_19-26Aug_2016	2016-08-19	17:24:30	Ok	FALSE	debbi	PB	Winter	E6	PB045	-33.1238	18.0018	57	15	2016-08-19	2016-08-26	animal	0	0	NA	NA	cattle egret	2	cattle egret	2	Disturbed	NA	NA	flat	management track	2	NA	NA
I_00004a.JPG		PB045_Cam15_19-26Aug_2016	2016-08-19	17:24:30	Ok	FALSE	debbi	PB	Winter	E6	PB045	-33.1238	18.0018	57	15	2016-08-19	2016-08-26	animal	0	0	NA	NA	cattle egret	1	cattle egret	1	Disturbed	NA	NA	flat	management track	2	NA	NA
I_00002a.JPG		PB045_Cam15_19-26Aug_2016	2016-08-19	17:19:28	Ok	FALSE	debbi	PB	Winter	E6	PB045	-33.1238	18.0018	57	15	2016-08-19	2016-08-26	animal	0	0	NA	NA	eland	2	eland	2	Disturbed	NA	1 A U	flat	management track	2	NA	adult male
I_00002b.JPG		PB045_Cam15_19-26Aug_2016	2016-08-19	17:19:28	Ok	FALSE	debbi	PB	Winter	E6	PB045	-33.1238	18.0018	57	15	2016-08-19	2016-08-26	animal	0	0	NA	NA	eland	2	eland	2	Disturbed	NA	1 A U	flat	management track	2	NA	adult male
I_00002c.JPG		PB045_Cam15_19-26Aug_2016	2016-08-19	17:19:28	Ok	FALSE	debbi	PB	Winter	E6	PB045	-33.1238	18.0018	57	15	2016-08-19	2016-08-26	animal	0	0	NA	NA	eland	2	eland	2	Disturbed	NA	1 A U	flat	management track	2	NA	adult male
I_00003a.JPG		PB045_Cam15_19-26Aug_2016	2016-08-19	17:19:53	Ok	FALSE	debbi	PB	Winter	E6	PB045	-33.1238	18.0018	57	15	2016-08-19	2016-08-26	animal	0	0	NA	NA	eland	3	eland	3	Disturbed	NA	1 A F 1 A U	flat	management track	2	NA	adult male
I_00003b.JPG		PB045_Cam15_19-26Aug_2016	2016-08-19	17:19:53	Ok	FALSE	debbi	PB	Winter	E6	PB045	-33.1238	18.0018	57	15	2016-08-19	2016-08-26	animal	0	0	NA	NA	eland	3	eland	3	Disturbed	NA	1 A F 1 A U	flat	management track	2	NA	adult male
I_00003c.JPG		PB045_Cam15_19-26Aug_2016	2016-08-19	17:19:53	Ok	FALSE	debbi	PB	Winter	E6	PB045	-33.1238	18.0018	57	15	2016-08-19	2016-08-26	animal	0	0	NA	NA	eland	3	eland	3	Disturbed	NA	1 A F 1 A U	flat	management track	2	NA	adult male
I_00018b.JPG		PB045_Cam15_19-26Aug_2016	2016-08-21	17:34:46	Ok	FALSE	debbi	PB	Winter	E6	PB045	-33.1238	18.0018	57	15	2016-08-19	2016-08-26	animal	0	0	NA	NA	eland	2	eland	2	Disturbed	NA	2 A U	flat	management track	2	NA	NA
I_00018a.JPG		PB045_Cam15_19-26Aug_2016	2016-08-21	17:34:46	Ok	FALSE	debbi	PB	Winter	E6	PB045	-33.1238	18.0018	57	15	2016-08-19	2016-08-26	animal	0	0	NA	NA	eland	2	eland	2	Disturbed	NA	2 A U	flat	management track	2	NA	NA
I_00018c.JPG		PB045_Cam15_19-26Aug_2016	2016-08-21	17:34:46	Ok	FALSE	debbi	PB	Winter	E6	PB045	-33.1238	18.0018	57	15	2016-08-19	2016-08-26	animal	0	0	NA	NA	eland	2	eland	2	Disturbed	NA	2 A U	flat	management track	2	NA	NA
I_00005c.JPG		PB045_Cam15_19-26Aug_2016	2016-08-20	12:51:45	Ok	FALSE	debbi	PB	Winter	E6	PB045	-33.1238	18.0018	57	15	2016-08-19	2016-08-26	animal	0	0	NA	NA	european starling	2	european starling	2	Disturbed	NA	NA	flat	management track	2	NA	NA
I_00005a.JPG		PB045_Cam15_19-26Aug_2016	2016-08-20	12:51:45	Ok	FALSE	debbi	PB	Winter	E6	PB045	-33.1238	18.0018	57	15	2016-08-19	2016-08-26	animal	0	0	NA	NA	european starling	4	european starling	4	Disturbed	NA	NA	flat	management track	2	NA	NA
I_00005b.JPG		PB045_Cam15_19-26Aug_2016	2016-08-20	12:51:45	Ok	FALSE	debbi	PB	Winter	E6	PB045	-33.1238	18.0018	57	15	2016-08-19	2016-08-26	animal	0	0	NA	NA	european starling	4	european starling	4	Disturbed	NA	NA	flat	management track	2	NA	NA
I_00007b.JPG		PB045_Cam15_19-26Aug_2016	2016-08-20	13:59:50	Ok	FALSE	debbi	PB	Winter	E6	PB045	-33.1238	18.0018	57	15	2016-08-19	2016-08-26	animal	0	0	NA	NA	european starling	1	european starling	1	Disturbed	NA	NA	flat	management track	2	NA	NA
I_00007c.JPG		PB045_Cam15_19-26Aug_2016	2016-08-20	13:59:50	Ok	FALSE	debbi	PB	Winter	E6	PB045	-33.1238	18.0018	57	15	2016-08-19	2016-08-26	animal	0	0	NA	NA	european starling	1	european starling	1	Disturbed	NA	NA	flat	management track	2	NA	NA
I_00007a.JPG		PB045_Cam15_19-26Aug_2016	2016-08-20	13:59:50	Ok	FALSE	debbi	PB	Winter	E6	PB045	-33.1238	18.0018	57	15	2016-08-19	2016-08-26	animal	0	0	NA	NA	european starling	2	european starling	2	Disturbed	NA	NA	flat	management track	2	NA	NA
I_00008a.JPG		PB045_Cam15_19-26Aug_2016	2016-08-20	14:00:57	Ok	FALSE	debbi	PB	Winter	E6	PB045	-33.1238	18.0018	57	15	2016-08-19	2016-08-26	animal	0	0	NA	NA	european starling	1	european starling	1	Disturbed	NA	NA	flat	management track	2	NA	NA
I_00001a.JPG		PB045_Cam15_19-26Aug_2016	2016-08-19	10:36:47	Ok	FALSE	debbi	PB	Winter	E6	PB045	-33.1238	18.0018	57	15	2016-08-19	2016-08-26	animal	0	0	NA	NA	guinea fowl	1	guinea fowl	1	Disturbed	NA	NA	flat	management track	2	NA	NA
I_00022a.JPG		PB045_Cam15_19-26Aug_2016	2016-08-25	15:43:47	Ok	FALSE	debbi	PB	Winter	E6	PB045	-33.1238	18.0018	57	15	2016-08-19	2016-08-26	animal	0	0	NA	NA	ostrich	1	ostrich	1	Disturbed	NA	1 J U	flat	management track	2	NA	NA
I_00006a.JPG		PB045_Cam15_19-26Aug_2016	2016-08-20	13:58:56	Ok	FALSE	debbi	PB	Winter	E6	PB045	-33.1238	18.0018	57	15	2016-08-19	2016-08-26	animal	0	0	NA	NA	unknown bird	1	unknown bird	1	Disturbed	NA	NA	flat	management track	2	NA	NA
I_00008b.JPG		PB045_Cam15_19-26Aug_2016	2016-08-20	14:00:57	Ok	FALSE	debbi	PB	Winter	E6	PB045	-33.1238	18.0018	57	15	2016-08-19	2016-08-26	animal	0	0	NA	NA	unknown bird	1	unknown bird	1	Disturbed	NA	NA	flat	management track	2	NA	NA
I_00006a.JPG		PB046_Cam009_26Aug-9Sep_2016	2016-09-02	10:39:17	Ok	FALSE	debbi	PB	Spring	E7	PB046	-33.1245	18.0128	47	9	2016-08-26	2016-09-09	animal	0	0	NA	NA	cape spurfowl	1	cape spurfowl	1	Natural	NA	NA	moderate	game trail	0	NA	NA
I_00006b.JPG		PB046_Cam009_26Aug-9Sep_2016	2016-09-02	10:39:17	Ok	FALSE	debbi	PB	Spring	E7	PB046	-33.1245	18.0128	47	9	2016-08-26	2016-09-09	animal	0	0	NA	NA	cape spurfowl	1	cape spurfowl	1	Natural	NA	NA	moderate	game trail	0	NA	NA
I_00006c.JPG		PB046_Cam009_26Aug-9Sep_2016	2016-09-02	10:39:17	Ok	FALSE	debbi	PB	Spring	E7	PB046	-33.1245	18.0128	47	9	2016-08-26	2016-09-09	animal	0	0	NA	NA	cape spurfowl	1	cape spurfowl	1	Natural	NA	NA	moderate	game trail	0	NA	NA
I_00007a.JPG		PB046_Cam009_26Aug-9Sep_2016	2016-09-02	11:02:32	Ok	FALSE	debbi	PB	Spring	E7	PB046	-33.1245	18.0128	47	9	2016-08-26	2016-09-09	animal	0	0	NA	NA	cape spurfowl	1	cape spurfowl	1	Natural	NA	NA	moderate	game trail	0	NA	NA
I_00007b.JPG		PB046_Cam009_26Aug-9Sep_2016	2016-09-02	11:02:32	Ok	FALSE	debbi	PB	Spring	E7	PB046	-33.1245	18.0128	47	9	2016-08-26	2016-09-09	animal	0	0	NA	NA	cape spurfowl	1	cape spurfowl	1	Natural	NA	NA	moderate	game trail	0	NA	NA
I_00007c.JPG		PB046_Cam009_26Aug-9Sep_2016	2016-09-02	11:02:32	Ok	FALSE	debbi	PB	Spring	E7	PB046	-33.1245	18.0128	47	9	2016-08-26	2016-09-09	animal	0	0	NA	NA	cape spurfowl	1	cape spurfowl	1	Natural	NA	NA	moderate	game trail	0	NA	NA
I_00001a.JPG		PB046_Cam009_26Aug-9Sep_2016	2016-08-30	22:36:46	Ok	FALSE	debbi	PB	Winter	E7	PB046	-33.1245	18.0128	47	9	2016-08-26	2016-09-09	animal	0	0	NA	NA	common duiker	1	common duiker	1	Natural	NA	1 A U	moderate	game trail	0	NA	NA
I_00001b.JPG		PB046_Cam009_26Aug-9Sep_2016	2016-08-30	22:36:46	Ok	FALSE	debbi	PB	Winter	E7	PB046	-33.1245	18.0128	47	9	2016-08-26	2016-09-09	animal	0	0	NA	NA	common duiker	1	common duiker	1	Natural	NA	1 A U	moderate	game trail	0	NA	NA
I_00001c.JPG		PB046_Cam009_26Aug-9Sep_2016	2016-08-30	22:36:46	Ok	FALSE	debbi	PB	Winter	E7	PB046	-33.1245	18.0128	47	9	2016-08-26	2016-09-09	animal	0	0	NA	NA	common duiker	1	common duiker	1	Natural	NA	1 A U	moderate	game trail	0	NA	NA
I_00002a.JPG		PB046_Cam009_26Aug-9Sep_2016	2016-09-01	07:24:47	Ok	FALSE	debbi	PB	Spring	E7	PB046	-33.1245	18.0128	47	9	2016-08-26	2016-09-09	animal	0	0	NA	NA	common duiker	1	common duiker	1	Natural	NA	NA	moderate	game trail	0	NA	adult male
I_00002b.JPG		PB046_Cam009_26Aug-9Sep_2016	2016-09-01	07:24:47	Ok	FALSE	debbi	PB	Spring	E7	PB046	-33.1245	18.0128	47	9	2016-08-26	2016-09-09	animal	0	0	NA	NA	common duiker	1	common duiker	1	Natural	NA	NA	moderate	game trail	0	NA	adult male
I_00002c.JPG		PB046_Cam009_26Aug-9Sep_2016	2016-09-01	07:24:47	Ok	FALSE	debbi	PB	Spring	E7	PB046	-33.1245	18.0128	47	9	2016-08-26	2016-09-09	animal	0	0	NA	NA	common duiker	1	common duiker	1	Natural	NA	NA	moderate	game trail	0	NA	adult male
I_00011a.JPG		PB046_Cam009_26Aug-9Sep_2016	2016-09-09	01:28:39	Ok	FALSE	debbi	PB	Spring	E7	PB046	-33.1245	18.0128	47	9	2016-08-26	2016-09-09	animal	0	0	NA	NA	common duiker	1	common duiker	1	Natural	NA	1 A U	moderate	game trail	0	NA	NA
I_00011b.JPG		PB046_Cam009_26Aug-9Sep_2016	2016-09-09	01:28:39	Ok	FALSE	debbi	PB	Spring	E7	PB046	-33.1245	18.0128	47	9	2016-08-26	2016-09-09	animal	0	0	NA	NA	common duiker	1	common duiker	1	Natural	NA	1 A U	moderate	game trail	0	NA	NA
I_00011c.JPG		PB046_Cam009_26Aug-9Sep_2016	2016-09-09	01:28:39	Ok	FALSE	debbi	PB	Spring	E7	PB046	-33.1245	18.0128	47	9	2016-08-26	2016-09-09	animal	0	0	NA	NA	common duiker	1	common duiker	1	Natural	NA	1 A U	moderate	game trail	0	NA	NA
I_00008a.JPG		PB046_Cam009_26Aug-9Sep_2016	2016-09-04	12:33:12	Ok	FALSE	debbi	PB	Spring	E7	PB046	-33.1245	18.0128	47	9	2016-08-26	2016-09-09	animal	0	0	NA	NA	grey-winged francolin	1	grey-winged francolin	1	Natural	NA	NA	moderate	game trail	0	NA	NA
I_00008b.JPG		PB046_Cam009_26Aug-9Sep_2016	2016-09-04	12:33:12	Ok	FALSE	debbi	PB	Spring	E7	PB046	-33.1245	18.0128	47	9	2016-08-26	2016-09-09	animal	0	0	NA	NA	grey-winged francolin	1	grey-winged francolin	1	Natural	NA	NA	moderate	game trail	0	NA	NA
I_00008c.JPG		PB046_Cam009_26Aug-9Sep_2016	2016-09-04	12:33:12	Ok	FALSE	debbi	PB	Spring	E7	PB046	-33.1245	18.0128	47	9	2016-08-26	2016-09-09	animal	0	0	NA	NA	grey-winged francolin	1	grey-winged francolin	1	Natural	NA	NA	moderate	game trail	0	NA	NA
I_00009a.JPG		PB046_Cam009_26Aug-9Sep_2016	2016-09-04	17:28:13	Ok	FALSE	debbi	PB	Spring	E7	PB046	-33.1245	18.0128	47	9	2016-08-26	2016-09-09	animal	0	0	NA	NA	grey-winged francolin	1	grey-winged francolin	1	Natural	NA	NA	moderate	game trail	0	NA	NA
I_00009b.JPG		PB046_Cam009_26Aug-9Sep_2016	2016-09-04	17:28:13	Ok	FALSE	debbi	PB	Spring	E7	PB046	-33.1245	18.0128	47	9	2016-08-26	2016-09-09	animal	0	0	NA	NA	grey-winged francolin	1	grey-winged francolin	1	Natural	NA	NA	moderate	game trail	0	NA	NA
I_00009c.JPG		PB046_Cam009_26Aug-9Sep_2016	2016-09-04	17:28:13	Ok	FALSE	debbi	PB	Spring	E7	PB046	-33.1245	18.0128	47	9	2016-08-26	2016-09-09	animal	0	0	NA	NA	grey-winged francolin	1	grey-winged francolin	1	Natural	NA	NA	moderate	game trail	0	NA	NA
I_00010a.JPG		PB046_Cam009_26Aug-9Sep_2016	2016-09-05	11:27:27	Ok	FALSE	debbi	PB	Spring	E7	PB046	-33.1245	18.0128	47	9	2016-08-26	2016-09-09	animal	0	0	NA	NA	guinea fowl	1	guinea fowl	1	Natural	NA	NA	moderate	game trail	0	NA	NA
I_00010b.JPG		PB046_Cam009_26Aug-9Sep_2016	2016-09-05	11:27:27	Ok	FALSE	debbi	PB	Spring	E7	PB046	-33.1245	18.0128	47	9	2016-08-26	2016-09-09	animal	0	0	NA	NA	guinea fowl	1	guinea fowl	1	Natural	NA	NA	moderate	game trail	0	NA	NA
I_00010c.JPG		PB046_Cam009_26Aug-9Sep_2016	2016-09-05	11:27:27	Ok	FALSE	debbi	PB	Spring	E7	PB046	-33.1245	18.0128	47	9	2016-08-26	2016-09-09	animal	0	0	NA	NA	guinea fowl	1	guinea fowl	1	Natural	NA	NA	moderate	game trail	0	NA	NA
I_00003a.JPG		PB046_Cam009_26Aug-9Sep_2016	2016-09-02	07:10:55	Ok	FALSE	debbi	PB	Spring	E7	PB046	-33.1245	18.0128	47	9	2016-08-26	2016-09-09	animal	0	0	NA	NA	kudu	1	kudu	1	Natural	NA	1 U U	moderate	game trail	0	NA	NA
I_00003b.JPG		PB046_Cam009_26Aug-9Sep_2016	2016-09-02	07:10:55	Ok	FALSE	debbi	PB	Spring	E7	PB046	-33.1245	18.0128	47	9	2016-08-26	2016-09-09	animal	0	0	NA	NA	kudu	1	kudu	1	Natural	NA	1 U U	moderate	game trail	0	NA	NA
I_00003c.JPG		PB046_Cam009_26Aug-9Sep_2016	2016-09-02	07:10:55	Ok	FALSE	debbi	PB	Spring	E7	PB046	-33.1245	18.0128	47	9	2016-08-26	2016-09-09	animal	0	0	NA	NA	kudu	1	kudu	1	Natural	NA	1 U U	moderate	game trail	0	NA	NA
I_00004a.JPG		PB046_Cam009_26Aug-9Sep_2016	2016-09-02	07:11:37	Ok	FALSE	debbi	PB	Spring	E7	PB046	-33.1245	18.0128	47	9	2016-08-26	2016-09-09	animal	0	0	NA	NA	kudu	1	kudu	1	Natural	NA	1 U U	moderate	game trail	0	NA	NA
I_00004b.JPG		PB046_Cam009_26Aug-9Sep_2016	2016-09-02	07:11:37	Ok	FALSE	debbi	PB	Spring	E7	PB046	-33.1245	18.0128	47	9	2016-08-26	2016-09-09	animal	0	0	NA	NA	kudu	1	kudu	1	Natural	NA	1 U U	moderate	game trail	0	NA	NA
I_00004c.JPG		PB046_Cam009_26Aug-9Sep_2016	2016-09-02	07:11:37	Ok	FALSE	debbi	PB	Spring	E7	PB046	-33.1245	18.0128	47	9	2016-08-26	2016-09-09	animal	0	0	NA	NA	kudu	1	kudu	1	Natural	NA	1 U U	moderate	game trail	0	NA	NA
I_00005a.JPG		PB046_Cam009_26Aug-9Sep_2016	2016-09-02	07:11:58	Ok	FALSE	debbi	PB	Spring	E7	PB046	-33.1245	18.0128	47	9	2016-08-26	2016-09-09	animal	0	0	NA	NA	kudu	1	kudu	1	Natural	NA	1 U U	moderate	game trail	0	NA	NA
I_00005b.JPG		PB046_Cam009_26Aug-9Sep_2016	2016-09-02	07:11:58	Ok	FALSE	debbi	PB	Spring	E7	PB046	-33.1245	18.0128	47	9	2016-08-26	2016-09-09	animal	0	0	NA	NA	kudu	1	kudu	1	Natural	NA	1 U U	moderate	game trail	0	NA	NA
I_00005c.JPG		PB046_Cam009_26Aug-9Sep_2016	2016-09-02	07:11:58	Ok	FALSE	debbi	PB	Spring	E7	PB046	-33.1245	18.0128	47	9	2016-08-26	2016-09-09	animal	0	0	NA	NA	kudu	1	kudu	1	Natural	NA	1 U U	moderate	game trail	0	NA	NA
I_00004a.JPG		PB050_Cam9_9-23Sep_2016	2016-09-14	04:39:44	Ok	FALSE	Mila	PB	Spring	E8	PB050	-33.126	18.0249	11	9	2016-09-09	2016-09-23	animal	0	0	NA	NA	african wildcat	1	african wildcat	1	Natural	NA	1 A U	gentle	Management track	2	NA	NA
I_00003a.JPG		PB050_Cam9_9-23Sep_2016	2016-09-13	08:42:42	Ok	FALSE	Mila	PB	Spring	E8	PB050	-33.126	18.0249	11	9	2016-09-09	2016-09-23	animal	0	0	NA	NA	cape spurfowl	1	cape spurfowl	1	Natural	NA	Age and sex unknown	gentle	Management track	2	NA	NA
I_00003b.JPG		PB050_Cam9_9-23Sep_2016	2016-09-13	08:42:42	Ok	FALSE	Mila	PB	Spring	E8	PB050	-33.126	18.0249	11	9	2016-09-09	2016-09-23	animal	0	0	NA	NA	cape spurfowl	1	cape spurfowl	1	Natural	NA	Age and sex unknown	gentle	Management track	2	NA	NA
I_00003c.JPG		PB050_Cam9_9-23Sep_2016	2016-09-13	08:42:42	Ok	FALSE	Mila	PB	Spring	E8	PB050	-33.126	18.0249	11	9	2016-09-09	2016-09-23	animal	0	0	NA	NA	cape spurfowl	1	cape spurfowl	1	Natural	NA	Age and sex unknown	gentle	Management track	2	NA	NA
I_00006a.JPG		PB050_Cam9_9-23Sep_2016	2016-09-16	11:50:46	Ok	FALSE	Mila	PB	Spring	E8	PB050	-33.126	18.0249	11	9	2016-09-09	2016-09-23	animal	0	0	NA	NA	cape spurfowl	1	cape spurfowl	1	Natural	NA	Age and sex unknown	gentle	Management track	2	NA	NA
I_00006b.JPG		PB050_Cam9_9-23Sep_2016	2016-09-16	11:50:46	Ok	FALSE	Mila	PB	Spring	E8	PB050	-33.126	18.0249	11	9	2016-09-09	2016-09-23	animal	0	0	NA	NA	cape spurfowl	1	cape spurfowl	1	Natural	NA	Age and sex unknown	gentle	Management track	2	NA	NA
I_00006c.JPG		PB050_Cam9_9-23Sep_2016	2016-09-16	11:50:46	Ok	FALSE	Mila	PB	Spring	E8	PB050	-33.126	18.0249	11	9	2016-09-09	2016-09-23	animal	0	0	NA	NA	cape spurfowl	1	cape spurfowl	1	Natural	NA	Age and sex unknown	gentle	Management track	2	NA	NA
I_00010a.JPG		PB050_Cam9_9-23Sep_2016	2016-09-17	13:45:18	Ok	FALSE	Mila	PB	Spring	E8	PB050	-33.126	18.0249	11	9	2016-09-09	2016-09-23	animal	0	0	NA	NA	cape spurfowl	1	cape spurfowl	1	Natural	NA	Age and sex unknown	gentle	Management track	2	NA	NA
I_00010b.JPG		PB050_Cam9_9-23Sep_2016	2016-09-17	13:45:18	Ok	FALSE	Mila	PB	Spring	E8	PB050	-33.126	18.0249	11	9	2016-09-09	2016-09-23	animal	0	0	NA	NA	cape spurfowl	1	cape spurfowl	1	Natural	NA	Age and sex unknown	gentle	Management track	2	NA	NA
I_00010c.JPG		PB050_Cam9_9-23Sep_2016	2016-09-17	13:45:18	Ok	FALSE	Mila	PB	Spring	E8	PB050	-33.126	18.0249	11	9	2016-09-09	2016-09-23	animal	0	0	NA	NA	cape spurfowl	1	cape spurfowl	1	Natural	NA	Age and sex unknown	gentle	Management track	2	NA	NA
I_00011a.JPG		PB050_Cam9_9-23Sep_2016	2016-09-18	08:22:24	Ok	FALSE	Mila	PB	Spring	E8	PB050	-33.126	18.0249	11	9	2016-09-09	2016-09-23	animal	0	0	NA	NA	cape spurfowl	1	cape spurfowl	1	Natural	NA	Age and sex unknown	gentle	Management track	2	NA	NA
I_00011b.JPG		PB050_Cam9_9-23Sep_2016	2016-09-18	08:22:24	Ok	FALSE	Mila	PB	Spring	E8	PB050	-33.126	18.0249	11	9	2016-09-09	2016-09-23	animal	0	0	NA	NA	cape spurfowl	1	cape spurfowl	1	Natural	NA	Age and sex unknown	gentle	Management track	2	NA	NA
I_00011c.JPG		PB050_Cam9_9-23Sep_2016	2016-09-18	08:22:24	Ok	FALSE	Mila	PB	Spring	E8	PB050	-33.126	18.0249	11	9	2016-09-09	2016-09-23	animal	0	0	NA	NA	cape spurfowl	1	cape spurfowl	1	Natural	NA	Age and sex unknown	gentle	Management track	2	NA	NA
I_00012a.JPG		PB050_Cam9_9-23Sep_2016	2016-09-18	08:43:14	Ok	FALSE	Mila	PB	Spring	E8	PB050	-33.126	18.0249	11	9	2016-09-09	2016-09-23	animal	0	0	NA	NA	cape spurfowl	1	cape spurfowl	1	Natural	NA	Age and sex unknown	gentle	Management track	2	NA	NA
I_00012b.JPG		PB050_Cam9_9-23Sep_2016	2016-09-18	08:43:14	Ok	FALSE	Mila	PB	Spring	E8	PB050	-33.126	18.0249	11	9	2016-09-09	2016-09-23	animal	0	0	NA	NA	cape spurfowl	1	cape spurfowl	1	Natural	NA	Age and sex unknown	gentle	Management track	2	NA	NA
I_00012c.JPG		PB050_Cam9_9-23Sep_2016	2016-09-18	08:43:14	Ok	FALSE	Mila	PB	Spring	E8	PB050	-33.126	18.0249	11	9	2016-09-09	2016-09-23	animal	0	0	NA	NA	cape spurfowl	1	cape spurfowl	1	Natural	NA	Age and sex unknown	gentle	Management track	2	NA	NA
I_00013a.JPG		PB050_Cam9_9-23Sep_2016	2016-09-18	08:44:47	Ok	FALSE	Mila	PB	Spring	E8	PB050	-33.126	18.0249	11	9	2016-09-09	2016-09-23	animal	0	0	NA	NA	cape spurfowl	1	cape spurfowl	1	Natural	NA	Age and sex unknown	gentle	Management track	2	NA	NA
I_00013b.JPG		PB050_Cam9_9-23Sep_2016	2016-09-18	08:44:47	Ok	FALSE	Mila	PB	Spring	E8	PB050	-33.126	18.0249	11	9	2016-09-09	2016-09-23	animal	0	0	NA	NA	cape spurfowl	1	cape spurfowl	1	Natural	NA	Age and sex unknown	gentle	Management track	2	NA	NA
I_00013c.JPG		PB050_Cam9_9-23Sep_2016	2016-09-18	08:44:47	Ok	FALSE	Mila	PB	Spring	E8	PB050	-33.126	18.0249	11	9	2016-09-09	2016-09-23	animal	0	0	NA	NA	cape spurfowl	1	cape spurfowl	1	Natural	NA	Age and sex unknown	gentle	Management track	2	NA	NA
I_00001a.JPG		PB050_Cam9_9-23Sep_2016	2016-09-09	20:55:15	Ok	FALSE	Mila	PB	Spring	E8	PB050	-33.126	18.0249	11	9	2016-09-09	2016-09-23	animal	0	0	NA	NA	common duiker	1	common duiker	1	Natural	NA	1 A U	gentle	Management track	2	NA	NA
I_00005a.JPG		PB050_Cam9_9-23Sep_2016	2016-09-15	15:00:58	Ok	FALSE	Mila	PB	Spring	E8	PB050	-33.126	18.0249	11	9	2016-09-09	2016-09-23	animal	0	0	NA	NA	guinea fowl	2	guinea fowl	2	Natural	NA	Age and sex unknown	gentle	Management track	2	NA	NA
I_00005b.JPG		PB050_Cam9_9-23Sep_2016	2016-09-15	15:00:58	Ok	FALSE	Mila	PB	Spring	E8	PB050	-33.126	18.0249	11	9	2016-09-09	2016-09-23	animal	0	0	NA	NA	guinea fowl	2	guinea fowl	2	Natural	NA	Age and sex unknown	gentle	Management track	2	NA	NA
I_00005c.JPG		PB050_Cam9_9-23Sep_2016	2016-09-15	15:00:58	Ok	FALSE	Mila	PB	Spring	E8	PB050	-33.126	18.0249	11	9	2016-09-09	2016-09-23	animal	0	0	NA	NA	guinea fowl	2	guinea fowl	2	Natural	NA	Age and sex unknown	gentle	Management track	2	NA	NA
I_00015a.JPG		PB050_Cam9_9-23Sep_2016	2016-09-19	15:26:04	Ok	FALSE	Mila	PB	Spring	E8	PB050	-33.126	18.0249	11	9	2016-09-09	2016-09-23	animal	0	0	NA	NA	guinea fowl	1	guinea fowl	1	Natural	NA	Age and sex unknown	gentle	Management track	2	NA	NA
I_00015b.JPG		PB050_Cam9_9-23Sep_2016	2016-09-19	15:26:04	Ok	FALSE	Mila	PB	Spring	E8	PB050	-33.126	18.0249	11	9	2016-09-09	2016-09-23	animal	0	0	NA	NA	guinea fowl	1	guinea fowl	1	Natural	NA	Age and sex unknown	gentle	Management track	2	NA	NA
I_00015c.JPG		PB050_Cam9_9-23Sep_2016	2016-09-19	15:26:04	Ok	FALSE	Mila	PB	Spring	E8	PB050	-33.126	18.0249	11	9	2016-09-09	2016-09-23	animal	0	0	NA	NA	guinea fowl	1	guinea fowl	1	Natural	NA	Age and sex unknown	gentle	Management track	2	NA	NA
I_00016a.JPG		PB050_Cam9_9-23Sep_2016	2016-09-19	15:42:29	Ok	FALSE	Mila	PB	Spring	E8	PB050	-33.126	18.0249	11	9	2016-09-09	2016-09-23	animal	0	0	NA	NA	guinea fowl	1	guinea fowl	1	Natural	NA	Age and sex unknown	gentle	Management track	2	NA	NA
I_00016b.JPG		PB050_Cam9_9-23Sep_2016	2016-09-19	15:42:29	Ok	FALSE	Mila	PB	Spring	E8	PB050	-33.126	18.0249	11	9	2016-09-09	2016-09-23	animal	0	0	NA	NA	guinea fowl	1	guinea fowl	1	Natural	NA	Age and sex unknown	gentle	Management track	2	NA	NA
I_00016c.JPG		PB050_Cam9_9-23Sep_2016	2016-09-19	15:42:29	Ok	FALSE	Mila	PB	Spring	E8	PB050	-33.126	18.0249	11	9	2016-09-09	2016-09-23	animal	0	0	NA	NA	guinea fowl	1	guinea fowl	1	Natural	NA	Age and sex unknown	gentle	Management track	2	NA	NA
I_00017a.JPG		PB050_Cam9_9-23Sep_2016	2016-09-19	16:22:11	Ok	FALSE	Mila	PB	Spring	E8	PB050	-33.126	18.0249	11	9	2016-09-09	2016-09-23	animal	0	0	NA	NA	guinea fowl	1	guinea fowl	1	Natural	NA	Age and sex unknown	gentle	Management track	2	NA	NA
I_00017b.JPG		PB050_Cam9_9-23Sep_2016	2016-09-19	16:22:11	Ok	FALSE	Mila	PB	Spring	E8	PB050	-33.126	18.0249	11	9	2016-09-09	2016-09-23	animal	0	0	NA	NA	guinea fowl	2	guinea fowl	2	Natural	NA	Age and sex unknown	gentle	Management track	2	NA	NA
I_00017c.JPG		PB050_Cam9_9-23Sep_2016	2016-09-19	16:22:11	Ok	FALSE	Mila	PB	Spring	E8	PB050	-33.126	18.0249	11	9	2016-09-09	2016-09-23	animal	0	0	NA	NA	guinea fowl	2	guinea fowl	2	Natural	NA	Age and sex unknown	gentle	Management track	2	NA	NA
I_00002a.JPG		PB050_Cam9_9-23Sep_2016	2016-09-13	00:04:52	Ok	FALSE	Mila	PB	Spring	E8	PB050	-33.126	18.0249	11	9	2016-09-09	2016-09-23	animal	0	0	NA	NA	honey badger	1	honey badger	1	Natural	NA	1 A U	gentle	Management track	2	NA	NA
I_00018a.JPG		PB050_Cam9_9-23Sep_2016	2016-09-20	02:44:28	Ok	FALSE	Mila	PB	Spring	E8	PB050	-33.126	18.0249	11	9	2016-09-09	2016-09-23	animal	0	0	NA	NA	honey badger	1	honey badger	1	Natural	NA	1 A U	gentle	Management track	2	NA	NA
I_00018b.JPG		PB050_Cam9_9-23Sep_2016	2016-09-20	02:44:28	Ok	FALSE	Mila	PB	Spring	E8	PB050	-33.126	18.0249	11	9	2016-09-09	2016-09-23	animal	0	0	NA	NA	honey badger	1	honey badger	1	Natural	NA	1 A U	gentle	Management track	2	NA	NA
I_00007a.JPG		PB050_Cam9_9-23Sep_2016	2016-09-17	12:20:29	Ok	FALSE	Mila	PB	Spring	E8	PB050	-33.126	18.0249	11	9	2016-09-09	2016-09-23	animal	0	0	NA	NA	kelp gull	1	kelp gull	1	Natural	NA	Age and sex unknown	gentle	Management track	2	NA	NA
I_00007b.JPG		PB050_Cam9_9-23Sep_2016	2016-09-17	12:20:29	Ok	FALSE	Mila	PB	Spring	E8	PB050	-33.126	18.0249	11	9	2016-09-09	2016-09-23	animal	0	0	NA	NA	kelp gull	1	kelp gull	1	Natural	NA	Age and sex unknown	gentle	Management track	2	NA	NA
I_00007c.JPG		PB050_Cam9_9-23Sep_2016	2016-09-17	12:20:29	Ok	FALSE	Mila	PB	Spring	E8	PB050	-33.126	18.0249	11	9	2016-09-09	2016-09-23	animal	0	0	NA	NA	kelp gull	1	kelp gull	1	Natural	NA	Age and sex unknown	gentle	Management track	2	NA	NA
I_00008a.JPG		PB050_Cam9_9-23Sep_2016	2016-09-17	13:02:59	Ok	FALSE	Mila	PB	Spring	E8	PB050	-33.126	18.0249	11	9	2016-09-09	2016-09-23	animal	0	0	NA	NA	kelp gull	2	kelp gull	2	Natural	NA	Age and sex unknown	gentle	Management track	2	NA	NA
I_00008b.JPG		PB050_Cam9_9-23Sep_2016	2016-09-17	13:02:59	Ok	FALSE	Mila	PB	Spring	E8	PB050	-33.126	18.0249	11	9	2016-09-09	2016-09-23	animal	0	0	NA	NA	kelp gull	3	kelp gull	3	Natural	NA	Age and sex unknown	gentle	Management track	2	NA	NA
I_00008c.JPG		PB050_Cam9_9-23Sep_2016	2016-09-17	13:02:59	Ok	FALSE	Mila	PB	Spring	E8	PB050	-33.126	18.0249	11	9	2016-09-09	2016-09-23	animal	0	0	NA	NA	kelp gull	8	kelp gull	8	Natural	NA	Age and sex unknown	gentle	Management track	2	NA	NA
I_00009b.JPG		PB050_Cam9_9-23Sep_2016	2016-09-17	13:03:23	Ok	FALSE	Mila	PB	Spring	E8	PB050	-33.126	18.0249	11	9	2016-09-09	2016-09-23	animal	0	0	NA	NA	kelp gull	3	kelp gull	3	Natural	NA	Age and sex unknown	gentle	Management track	2	NA	NA
I_00009c.JPG		PB050_Cam9_9-23Sep_2016	2016-09-17	13:03:23	Ok	FALSE	Mila	PB	Spring	E8	PB050	-33.126	18.0249	11	9	2016-09-09	2016-09-23	animal	0	0	NA	NA	kelp gull	3	kelp gull	3	Natural	NA	Age and sex unknown	gentle	Management track	2	NA	NA
I_00009a.JPG		PB050_Cam9_9-23Sep_2016	2016-09-17	13:03:23	Ok	FALSE	Mila	PB	Spring	E8	PB050	-33.126	18.0249	11	9	2016-09-09	2016-09-23	animal	0	0	NA	NA	kelp gull	6	kelp gull	6	Natural	NA	Age and sex unknown	gentle	Management track	2	NA	NA
I_00014a.JPG		PB050_Cam9_9-23Sep_2016	2016-09-18	17:00:24	Ok	FALSE	Mila	PB	Spring	E8	PB050	-33.126	18.0249	11	9	2016-09-09	2016-09-23	animal	0	0	NA	NA	steenbok	1	steenbok	1	Natural	NA	NA	gentle	Management track	2	NA	adult female
I_00014b.JPG		PB050_Cam9_9-23Sep_2016	2016-09-18	17:00:24	Ok	FALSE	Mila	PB	Spring	E8	PB050	-33.126	18.0249	11	9	2016-09-09	2016-09-23	animal	0	0	NA	NA	steenbok	1	steenbok	1	Natural	NA	NA	gentle	Management track	2	NA	adult female
I_00014c.JPG		PB050_Cam9_9-23Sep_2016	2016-09-18	17:00:24	Ok	FALSE	Mila	PB	Spring	E8	PB050	-33.126	18.0249	11	9	2016-09-09	2016-09-23	animal	0	0	NA	NA	steenbok	1	steenbok	1	Natural	NA	NA	gentle	Management track	2	NA	adult female
I_00019a.JPG		PB050_Cam9_9-23Sep_2016	2016-09-20	08:07:37	Ok	FALSE	Mila	PB	Spring	E8	PB050	-33.126	18.0249	11	9	2016-09-09	2016-09-23	animal	0	0	NA	NA	steenbok	1	steenbok	1	Natural	NA	NA	gentle	Management track	2	NA	adult female
I_00108a.JPG		PB054_Cam001_26Aug-9Sep_2016	2016-09-03	05:44:09	Ok	FALSE	Mila	PB	Spring	E9	PB054	-33.1277	18.0298	8	1	2016-08-26	2016-09-09	animal	0	0	NA	NA	african wildcat	1	african wildcat	1	Natural	NA	1 A U	flat	private road	1	NA	NA
I_00108b.JPG		PB054_Cam001_26Aug-9Sep_2016	2016-09-03	05:44:09	Ok	FALSE	Mila	PB	Spring	E9	PB054	-33.1277	18.0298	8	1	2016-08-26	2016-09-09	animal	0	0	NA	NA	african wildcat	1	african wildcat	1	Natural	NA	1 A U	flat	private road	1	NA	NA
I_00108c.JPG		PB054_Cam001_26Aug-9Sep_2016	2016-09-03	05:44:09	Ok	FALSE	Mila	PB	Spring	E9	PB054	-33.1277	18.0298	8	1	2016-08-26	2016-09-09	animal	0	0	NA	NA	african wildcat	1	african wildcat	1	Natural	NA	1 A U	flat	private road	1	NA	NA
I_00122a.JPG		PB054_Cam001_26Aug-9Sep_2016	2016-09-04	19:53:00	Ok	FALSE	Mila	PB	Spring	E9	PB054	-33.1277	18.0298	8	1	2016-08-26	2016-09-09	animal	0	0	NA	NA	african wildcat	1	african wildcat	1	Natural	NA	1 A U	flat	private road	1	NA	NA
I_00122b.JPG		PB054_Cam001_26Aug-9Sep_2016	2016-09-04	19:53:00	Ok	FALSE	Mila	PB	Spring	E9	PB054	-33.1277	18.0298	8	1	2016-08-26	2016-09-09	animal	0	0	NA	NA	african wildcat	1	african wildcat	1	Natural	NA	1 A U	flat	private road	1	NA	NA
I_00122c.JPG		PB054_Cam001_26Aug-9Sep_2016	2016-09-04	19:53:00	Ok	FALSE	Mila	PB	Spring	E9	PB054	-33.1277	18.0298	8	1	2016-08-26	2016-09-09	animal	0	0	NA	NA	african wildcat	1	african wildcat	1	Natural	NA	1 A U	flat	private road	1	NA	NA
I_00151a.JPG		PB054_Cam001_26Aug-9Sep_2016	2016-09-09	05:08:47	Ok	FALSE	Mila	PB	Spring	E9	PB054	-33.1277	18.0298	8	1	2016-08-26	2016-09-09	animal	0	0	NA	NA	african wildcat	1	african wildcat	1	Natural	NA	1 A U	flat	private road	1	NA	NA
I_00018a.JPG		PB054_Cam001_26Aug-9Sep_2016	2016-08-27	08:33:38	Ok	FALSE	Mila	PB	Winter	E9	PB054	-33.1277	18.0298	8	1	2016-08-26	2016-09-09	animal	0	0	NA	NA	cape spurfowl	1	cape spurfowl	1	Natural	NA	Unknown age amd sex	flat	private road	1	NA	NA
I_00072a.JPG		PB054_Cam001_26Aug-9Sep_2016	2016-08-30	08:15:54	Ok	FALSE	Mila	PB	Winter	E9	PB054	-33.1277	18.0298	8	1	2016-08-26	2016-09-09	animal	0	0	NA	NA	cape spurfowl	1	cape spurfowl	1	Natural	NA	Age and sex unknown	flat	private road	1	NA	NA
I_00072b.JPG		PB054_Cam001_26Aug-9Sep_2016	2016-08-30	08:15:54	Ok	FALSE	Mila	PB	Winter	E9	PB054	-33.1277	18.0298	8	1	2016-08-26	2016-09-09	animal	0	0	NA	NA	cape spurfowl	1	cape spurfowl	1	Natural	NA	Age and sex unknown	flat	private road	1	NA	NA
I_00072c.JPG		PB054_Cam001_26Aug-9Sep_2016	2016-08-30	08:15:54	Ok	FALSE	Mila	PB	Winter	E9	PB054	-33.1277	18.0298	8	1	2016-08-26	2016-09-09	animal	0	0	NA	NA	cape spurfowl	1	cape spurfowl	1	Natural	NA	Age and sex unknown	flat	private road	1	NA	NA
I_00103a.JPG		PB054_Cam001_26Aug-9Sep_2016	2016-09-02	10:15:40	Ok	FALSE	Mila	PB	Spring	E9	PB054	-33.1277	18.0298	8	1	2016-08-26	2016-09-09	animal	0	0	NA	NA	cape spurfowl	1	cape spurfowl	1	Natural	NA	Age and sex unknown	flat	private road	1	NA	NA
I_00103b.JPG		PB054_Cam001_26Aug-9Sep_2016	2016-09-02	10:15:40	Ok	FALSE	Mila	PB	Spring	E9	PB054	-33.1277	18.0298	8	1	2016-08-26	2016-09-09	animal	0	0	NA	NA	cape spurfowl	1	cape spurfowl	1	Natural	NA	Age and sex unknown	flat	private road	1	NA	NA
I_00103c.JPG		PB054_Cam001_26Aug-9Sep_2016	2016-09-02	10:15:40	Ok	FALSE	Mila	PB	Spring	E9	PB054	-33.1277	18.0298	8	1	2016-08-26	2016-09-09	animal	0	0	NA	NA	cape spurfowl	1	cape spurfowl	1	Natural	NA	Age and sex unknown	flat	private road	1	NA	NA
I_00114a.JPG		PB054_Cam001_26Aug-9Sep_2016	2016-09-03	15:51:16	Ok	FALSE	Mila	PB	Spring	E9	PB054	-33.1277	18.0298	8	1	2016-08-26	2016-09-09	animal	0	0	NA	NA	cape spurfowl	1	cape spurfowl	1	Natural	NA	Age and sex unknown	flat	private road	1	NA	NA
I_00116a.JPG		PB054_Cam001_26Aug-9Sep_2016	2016-09-04	07:04:32	Ok	FALSE	Mila	PB	Spring	E9	PB054	-33.1277	18.0298	8	1	2016-08-26	2016-09-09	animal	0	0	NA	NA	cape spurfowl	1	cape spurfowl	1	Natural	NA	Age and sex unknown	flat	private road	1	NA	NA
I_00117a.JPG		PB054_Cam001_26Aug-9Sep_2016	2016-09-04	07:41:25	Ok	FALSE	Mila	PB	Spring	E9	PB054	-33.1277	18.0298	8	1	2016-08-26	2016-09-09	animal	0	0	NA	NA	cape spurfowl	1	cape spurfowl	1	Natural	NA	Age and sex unknown	flat	private road	1	NA	NA
I_00117b.JPG		PB054_Cam001_26Aug-9Sep_2016	2016-09-04	07:41:25	Ok	FALSE	Mila	PB	Spring	E9	PB054	-33.1277	18.0298	8	1	2016-08-26	2016-09-09	animal	0	0	NA	NA	cape spurfowl	1	cape spurfowl	1	Natural	NA	Age and sex unknown	flat	private road	1	NA	NA
I_00117c.JPG		PB054_Cam001_26Aug-9Sep_2016	2016-09-04	07:41:25	Ok	FALSE	Mila	PB	Spring	E9	PB054	-33.1277	18.0298	8	1	2016-08-26	2016-09-09	animal	0	0	NA	NA	cape spurfowl	1	cape spurfowl	1	Natural	NA	Age and sex unknown	flat	private road	1	NA	NA
I_00118a.JPG		PB054_Cam001_26Aug-9Sep_2016	2016-09-04	07:43:54	Ok	FALSE	Mila	PB	Spring	E9	PB054	-33.1277	18.0298	8	1	2016-08-26	2016-09-09	animal	0	0	NA	NA	cape spurfowl	1	cape spurfowl	1	Natural	NA	Age and sex unknown	flat	private road	1	NA	NA
I_00125a.JPG		PB054_Cam001_26Aug-9Sep_2016	2016-09-05	14:03:17	Ok	FALSE	Mila	PB	Spring	E9	PB054	-33.1277	18.0298	8	1	2016-08-26	2016-09-09	animal	0	0	NA	NA	cape spurfowl	1	cape spurfowl	1	Natural	NA	Age and sex unknown	flat	private road	1	NA	NA
I_00125b.JPG		PB054_Cam001_26Aug-9Sep_2016	2016-09-05	14:03:17	Ok	FALSE	Mila	PB	Spring	E9	PB054	-33.1277	18.0298	8	1	2016-08-26	2016-09-09	animal	0	0	NA	NA	cape spurfowl	1	cape spurfowl	1	Natural	NA	Age and sex unknown	flat	private road	1	NA	NA
I_00099a.JPG		PB054_Cam001_26Aug-9Sep_2016	2016-09-02	07:04:33	Ok	FALSE	Mila	PB	Spring	E9	PB054	-33.1277	18.0298	8	1	2016-08-26	2016-09-09	animal	0	0	NA	NA	eland	1	eland	1	Natural	NA	1 A U	flat	private road	1	NA	NA
I_00099b.JPG		PB054_Cam001_26Aug-9Sep_2016	2016-09-02	07:04:33	Ok	FALSE	Mila	PB	Spring	E9	PB054	-33.1277	18.0298	8	1	2016-08-26	2016-09-09	animal	0	0	NA	NA	eland	1	eland	1	Natural	NA	1 A U	flat	private road	1	NA	NA
I_00099c.JPG		PB054_Cam001_26Aug-9Sep_2016	2016-09-02	07:04:33	Ok	FALSE	Mila	PB	Spring	E9	PB054	-33.1277	18.0298	8	1	2016-08-26	2016-09-09	animal	0	0	NA	NA	eland	1	eland	1	Natural	NA	1 A U	flat	private road	1	NA	NA
I_00100a.JPG		PB054_Cam001_26Aug-9Sep_2016	2016-09-02	07:04:55	Ok	FALSE	Mila	PB	Spring	E9	PB054	-33.1277	18.0298	8	1	2016-08-26	2016-09-09	animal	0	0	NA	NA	eland	1	eland	1	Natural	NA	1 A U	flat	private road	1	NA	NA
I_00100b.JPG		PB054_Cam001_26Aug-9Sep_2016	2016-09-02	07:04:55	Ok	FALSE	Mila	PB	Spring	E9	PB054	-33.1277	18.0298	8	1	2016-08-26	2016-09-09	animal	0	0	NA	NA	eland	1	eland	1	Natural	NA	1 A U	flat	private road	1	NA	NA
I_00100c.JPG		PB054_Cam001_26Aug-9Sep_2016	2016-09-02	07:04:55	Ok	FALSE	Mila	PB	Spring	E9	PB054	-33.1277	18.0298	8	1	2016-08-26	2016-09-09	animal	0	0	NA	NA	eland	1	eland	1	Natural	NA	1 A U	flat	private road	1	NA	NA
I_00101a.JPG		PB054_Cam001_26Aug-9Sep_2016	2016-09-02	07:05:17	Ok	FALSE	Mila	PB	Spring	E9	PB054	-33.1277	18.0298	8	1	2016-08-26	2016-09-09	animal	0	0	NA	NA	eland	1	eland	1	Natural	NA	1 A U	flat	private road	1	NA	NA
I_00101b.JPG		PB054_Cam001_26Aug-9Sep_2016	2016-09-02	07:05:17	Ok	FALSE	Mila	PB	Spring	E9	PB054	-33.1277	18.0298	8	1	2016-08-26	2016-09-09	animal	0	0	NA	NA	eland	1	eland	1	Natural	NA	1 A U	flat	private road	1	NA	NA
I_00101c.JPG		PB054_Cam001_26Aug-9Sep_2016	2016-09-02	07:05:17	Ok	FALSE	Mila	PB	Spring	E9	PB054	-33.1277	18.0298	8	1	2016-08-26	2016-09-09	animal	0	0	NA	NA	eland	1	eland	1	Natural	NA	1 A U	flat	private road	1	NA	NA
I_00102a.JPG		PB054_Cam001_26Aug-9Sep_2016	2016-09-02	07:05:52	Ok	FALSE	Mila	PB	Spring	E9	PB054	-33.1277	18.0298	8	1	2016-08-26	2016-09-09	animal	0	0	NA	NA	eland	1	eland	1	Natural	NA	1 A U	flat	private road	1	NA	NA
I_00102b.JPG		PB054_Cam001_26Aug-9Sep_2016	2016-09-02	07:05:52	Ok	FALSE	Mila	PB	Spring	E9	PB054	-33.1277	18.0298	8	1	2016-08-26	2016-09-09	animal	0	0	NA	NA	eland	1	eland	1	Natural	NA	1 A U	flat	private road	1	NA	NA
I_00102c.JPG		PB054_Cam001_26Aug-9Sep_2016	2016-09-02	07:05:52	Ok	FALSE	Mila	PB	Spring	E9	PB054	-33.1277	18.0298	8	1	2016-08-26	2016-09-09	animal	0	0	NA	NA	eland	1	eland	1	Natural	NA	1 A U	flat	private road	1	NA	NA
I_00062a.JPG		PB054_Cam001_26Aug-9Sep_2016	2016-08-29	10:56:36	Ok	FALSE	Mila	PB	Winter	E9	PB054	-33.1277	18.0298	8	1	2016-08-26	2016-09-09	animal	0	0	NA	NA	guinea fowl	1	guinea fowl	1	Natural	NA	Age and sex unknown	flat	private road	1	NA	NA
I_00071a.JPG		PB054_Cam001_26Aug-9Sep_2016	2016-08-29	23:24:52	Ok	FALSE	Mila	PB	Winter	E9	PB054	-33.1277	18.0298	8	1	2016-08-26	2016-09-09	animal	0	0	NA	NA	kudu	1	kudu	1	Natural	NA	Species unknown	flat	private road	1	NA	NA
I_00071b.JPG		PB054_Cam001_26Aug-9Sep_2016	2016-08-29	23:24:52	Ok	FALSE	Mila	PB	Winter	E9	PB054	-33.1277	18.0298	8	1	2016-08-26	2016-09-09	animal	0	0	NA	NA	kudu	1	kudu	1	Natural	NA	Species unknown	flat	private road	1	NA	NA
I_00127b.JPG		PB054_Cam001_26Aug-9Sep_2016	2016-09-05	17:26:26	Ok	FALSE	Mila	PB	Spring	E9	PB054	-33.1277	18.0298	8	1	2016-08-26	2016-09-09	animal	0	0	NA	NA	kudu	1	kudu	1	Natural	NA	1 A U	flat	private road	1	NA	NA
I_00127c.JPG		PB054_Cam001_26Aug-9Sep_2016	2016-09-05	17:26:26	Ok	FALSE	Mila	PB	Spring	E9	PB054	-33.1277	18.0298	8	1	2016-08-26	2016-09-09	animal	0	0	NA	NA	kudu	1	kudu	1	Natural	NA	1 A U	flat	private road	1	NA	NA
I_00127a.JPG		PB054_Cam001_26Aug-9Sep_2016	2016-09-05	17:26:26	Ok	FALSE	Mila	PB	Spring	E9	PB054	-33.1277	18.0298	8	1	2016-08-26	2016-09-09	animal	0	0	NA	NA	kudu	2	kudu	2	Natural	NA	2 A U	flat	private road	1	NA	NA
I_00128a.JPG		PB054_Cam001_26Aug-9Sep_2016	2016-09-05	17:28:23	Ok	FALSE	Mila	PB	Spring	E9	PB054	-33.1277	18.0298	8	1	2016-08-26	2016-09-09	animal	0	0	NA	NA	kudu	1	kudu	1	Natural	NA	1 A U	flat	private road	1	NA	NA
I_00129a.JPG		PB054_Cam001_26Aug-9Sep_2016	2016-09-05	17:28:52	Ok	FALSE	Mila	PB	Spring	E9	PB054	-33.1277	18.0298	8	1	2016-08-26	2016-09-09	animal	0	0	NA	NA	kudu	1	kudu	1	Natural	NA	1 A U	flat	private road	1	NA	NA
I_00091a.JPG		PB054_Cam001_26Aug-9Sep_2016	2016-09-01	02:30:49	Ok	FALSE	Mila	PB	Spring	E9	PB054	-33.1277	18.0298	8	1	2016-08-26	2016-09-09	animal	0	0	NA	NA	large herbivore	1	large herbivore	1	Natural	NA	Species unknown	flat	private road	1	NA	NA
I_00092a.JPG		PB054_Cam001_26Aug-9Sep_2016	2016-09-01	06:43:31	Ok	FALSE	Mila	PB	Spring	E9	PB054	-33.1277	18.0298	8	1	2016-08-26	2016-09-09	animal	0	0	NA	NA	large herbivore	1	large herbivore	1	Natural	NA	Species unknown	flat	private road	1	NA	NA
I_00097a.JPG		PB054_Cam001_26Aug-9Sep_2016	2016-09-02	03:01:39	Ok	FALSE	Mila	PB	Spring	E9	PB054	-33.1277	18.0298	8	1	2016-08-26	2016-09-09	animal	0	0	NA	NA	large herbivore	1	large herbivore	1	Natural	NA	Species unknown	flat	private road	1	NA	NA
I_00098a.JPG		PB054_Cam001_26Aug-9Sep_2016	2016-09-02	03:03:36	Ok	FALSE	Mila	PB	Spring	E9	PB054	-33.1277	18.0298	8	1	2016-08-26	2016-09-09	animal	0	0	NA	NA	large herbivore	1	large herbivore	1	Natural	NA	Species unknown	flat	private road	1	NA	NA
I_00133a.JPG		PB054_Cam001_26Aug-9Sep_2016	2016-09-06	14:43:18	Ok	FALSE	Mila	PB	Spring	E9	PB054	-33.1277	18.0298	8	1	2016-08-26	2016-09-09	animal	0	0	NA	NA	unknown species	1	unknown species	1	Natural	NA	Species unknown	flat	private road	1	NA	NA
I_00007a.JPG		PB055_Cam12_18-25Aug_2016	2016-08-23	15:06:08	Ok	FALSE	Mila	PB	Winter	F3	PB055	-33.1313	17.978	11	12	2016-08-18	2016-08-25	animal	0	0	NA	NA	bontebok	1	bontebok	1	Disturbed	NA	1 A U, Elevation from Google Earth	flat	game trail	0	NA	NA
I_00007b.JPG		PB055_Cam12_18-25Aug_2016	2016-08-23	15:06:08	Ok	FALSE	Mila	PB	Winter	F3	PB055	-33.1313	17.978	11	12	2016-08-18	2016-08-25	animal	0	0	NA	NA	bontebok	1	bontebok	1	Disturbed	NA	1 A U, Elevation from Google Earth	flat	game trail	0	NA	NA
I_00007c.JPG		PB055_Cam12_18-25Aug_2016	2016-08-23	15:06:08	Ok	FALSE	Mila	PB	Winter	F3	PB055	-33.1313	17.978	11	12	2016-08-18	2016-08-25	animal	0	0	NA	NA	bontebok	1	bontebok	1	Disturbed	NA	1 A U, Elevation from Google Earth	flat	game trail	0	NA	NA
I_00004b.JPG		PB055_Cam12_18-25Aug_2016	2016-08-22	12:49:44	Ok	FALSE	Mila	PB	Winter	F3	PB055	-33.1313	17.978	11	12	2016-08-18	2016-08-25	animal	0	0	NA	NA	eland	1	eland	1	Disturbed	NA	Elevation from Google Earth	flat	game trail	0	NA	adult female
I_00004a.JPG		PB055_Cam12_18-25Aug_2016	2016-08-22	12:49:44	Ok	FALSE	Mila	PB	Winter	F3	PB055	-33.1313	17.978	11	12	2016-08-18	2016-08-25	animal	0	0	NA	NA	eland	1	eland	1	Disturbed	NA	Elevation from Google Earth	flat	game trail	0	NA	adult female
I_00004c.JPG		PB055_Cam12_18-25Aug_2016	2016-08-22	12:49:44	Ok	FALSE	Mila	PB	Winter	F3	PB055	-33.1313	17.978	11	12	2016-08-18	2016-08-25	animal	0	0	NA	NA	eland	1	eland	1	Disturbed	NA	Elevation from Google Earth	flat	game trail	0	NA	adult female
I_00005a.JPG		PB055_Cam12_18-25Aug_2016	2016-08-22	12:50:09	Ok	FALSE	Mila	PB	Winter	F3	PB055	-33.1313	17.978	11	12	2016-08-18	2016-08-25	animal	0	0	NA	NA	eland	1	eland	1	Disturbed	NA	Elevation from Google Earth	flat	game trail	0	NA	adult female
I_00005b.JPG		PB055_Cam12_18-25Aug_2016	2016-08-22	12:50:09	Ok	FALSE	Mila	PB	Winter	F3	PB055	-33.1313	17.978	11	12	2016-08-18	2016-08-25	animal	0	0	NA	NA	eland	1	eland	1	Disturbed	NA	Elevation from Google Earth	flat	game trail	0	NA	adult female
I_00001a.JPG		PB055_Cam12_18-25Aug_2016	2016-08-21	04:22:36	Ok	FALSE	Mila	PB	Winter	F3	PB055	-33.1313	17.978	11	12	2016-08-18	2016-08-25	animal	0	0	NA	NA	large herbivore	1	large herbivore	1	Disturbed	NA	Unknown species,elevation from Google Earth	flat	game trail	0	NA	NA
I_00001b.JPG		PB055_Cam12_18-25Aug_2016	2016-08-21	04:22:36	Ok	FALSE	Mila	PB	Winter	F3	PB055	-33.1313	17.978	11	12	2016-08-18	2016-08-25	animal	0	0	NA	NA	large herbivore	1	large herbivore	1	Disturbed	NA	Unknown species,elevation from Google Earth	flat	game trail	0	NA	NA
I_00001c.JPG		PB055_Cam12_18-25Aug_2016	2016-08-21	04:22:36	Ok	FALSE	Mila	PB	Winter	F3	PB055	-33.1313	17.978	11	12	2016-08-18	2016-08-25	animal	0	0	NA	NA	large herbivore	1	large herbivore	1	Disturbed	NA	Unknown species,elevation from Google Earth	flat	game trail	0	NA	NA
I_00006a.JPG		PB055_Cam12_18-25Aug_2016	2016-08-22	18:06:51	Ok	FALSE	Mila	PB	Winter	F3	PB055	-33.1313	17.978	11	12	2016-08-18	2016-08-25	animal	0	0	NA	NA	ostrich	1	ostrich	1	Disturbed	NA	Elevation from Google Earth	flat	game trail	0	NA	adult female
I_00006b.JPG		PB055_Cam12_18-25Aug_2016	2016-08-22	18:06:51	Ok	FALSE	Mila	PB	Winter	F3	PB055	-33.1313	17.978	11	12	2016-08-18	2016-08-25	animal	0	0	NA	NA	ostrich	1	ostrich	1	Disturbed	NA	Elevation from Google Earth	flat	game trail	0	NA	adult female
I_00006c.JPG		PB055_Cam12_18-25Aug_2016	2016-08-22	18:06:51	Ok	FALSE	Mila	PB	Winter	F3	PB055	-33.1313	17.978	11	12	2016-08-18	2016-08-25	animal	0	0	NA	NA	ostrich	1	ostrich	1	Disturbed	NA	Elevation from Google Earth	flat	game trail	0	NA	adult female
I_00001a.JPG		PB056_Cam11_8-22Sep_2016	2016-09-09	18:16:49	Ok	FALSE	Mila	PB	Spring	F3	PB056	-33.1363	17.9755	22	11	2016-09-08	2016-09-22	animal	0	0	NA	NA	eland	1	eland	1	Natural	NA	NA	gentle	game trail	0	NA	adult male
I_00001b.JPG		PB056_Cam11_8-22Sep_2016	2016-09-09	18:16:49	Ok	FALSE	Mila	PB	Spring	F3	PB056	-33.1363	17.9755	22	11	2016-09-08	2016-09-22	animal	0	0	NA	NA	eland	1	eland	1	Natural	NA	NA	gentle	game trail	0	NA	adult male
I_00001c.JPG		PB056_Cam11_8-22Sep_2016	2016-09-09	18:16:49	Ok	FALSE	Mila	PB	Spring	F3	PB056	-33.1363	17.9755	22	11	2016-09-08	2016-09-22	animal	0	0	NA	NA	eland	1	eland	1	Natural	NA	NA	gentle	game trail	0	NA	adult male
I_00002a.JPG		PB056_Cam11_8-22Sep_2016	2016-09-09	18:34:05	Ok	FALSE	Mila	PB	Spring	F3	PB056	-33.1363	17.9755	22	11	2016-09-08	2016-09-22	animal	0	0	NA	NA	eland	1	eland	1	Natural	NA	1 A U	gentle	game trail	0	NA	NA
I_00002b.JPG		PB056_Cam11_8-22Sep_2016	2016-09-09	18:34:05	Ok	FALSE	Mila	PB	Spring	F3	PB056	-33.1363	17.9755	22	11	2016-09-08	2016-09-22	animal	0	0	NA	NA	eland	1	eland	1	Natural	NA	1 A U	gentle	game trail	0	NA	NA
I_00003a.JPG		PB056_Cam11_8-22Sep_2016	2016-09-09	18:42:07	Ok	FALSE	Mila	PB	Spring	F3	PB056	-33.1363	17.9755	22	11	2016-09-08	2016-09-22	animal	0	0	NA	NA	eland	1	eland	1	Natural	NA	1 A U	gentle	game trail	0	NA	NA
I_00003b.JPG		PB056_Cam11_8-22Sep_2016	2016-09-09	18:42:07	Ok	FALSE	Mila	PB	Spring	F3	PB056	-33.1363	17.9755	22	11	2016-09-08	2016-09-22	animal	0	0	NA	NA	eland	1	eland	1	Natural	NA	1 A U	gentle	game trail	0	NA	NA
I_00003c.JPG		PB056_Cam11_8-22Sep_2016	2016-09-09	18:42:07	Ok	FALSE	Mila	PB	Spring	F3	PB056	-33.1363	17.9755	22	11	2016-09-08	2016-09-22	animal	0	0	NA	NA	eland	1	eland	1	Natural	NA	1 A U	gentle	game trail	0	NA	NA
I_00007a.JPG		PB056_Cam11_8-22Sep_2016	2016-09-18	11:49:56	Ok	FALSE	Mila	PB	Spring	F3	PB056	-33.1363	17.9755	22	11	2016-09-08	2016-09-22	animal	0	0	NA	NA	guinea fowl	1	guinea fowl	1	Natural	NA	Age and sex unknown	gentle	game trail	0	NA	NA
I_00007b.JPG		PB056_Cam11_8-22Sep_2016	2016-09-18	11:49:56	Ok	FALSE	Mila	PB	Spring	F3	PB056	-33.1363	17.9755	22	11	2016-09-08	2016-09-22	animal	0	0	NA	NA	guinea fowl	1	guinea fowl	1	Natural	NA	Age and sex unknown	gentle	game trail	0	NA	NA
I_00005a.JPG		PB056_Cam11_8-22Sep_2016	2016-09-15	03:10:57	Ok	FALSE	Mila	PB	Spring	F3	PB056	-33.1363	17.9755	22	11	2016-09-08	2016-09-22	animal	0	0	NA	NA	kudu	1	kudu	1	Natural	NA	Unknown species	gentle	game trail	0	NA	NA
I_00006a.JPG		PB056_Cam11_8-22Sep_2016	2016-09-15	06:30:54	Ok	FALSE	Mila	PB	Spring	F3	PB056	-33.1363	17.9755	22	11	2016-09-08	2016-09-22	animal	0	0	NA	NA	kudu	1	kudu	1	Natural	NA	NA	gentle	game trail	0	NA	adult male
I_00006b.JPG		PB056_Cam11_8-22Sep_2016	2016-09-15	06:30:54	Ok	FALSE	Mila	PB	Spring	F3	PB056	-33.1363	17.9755	22	11	2016-09-08	2016-09-22	animal	0	0	NA	NA	kudu	1	kudu	1	Natural	NA	NA	gentle	game trail	0	NA	adult male
I_00008a.JPG		PB056_Cam11_8-22Sep_2016	2016-09-21	13:32:32	Ok	FALSE	Mila	PB	Spring	F3	PB056	-33.1363	17.9755	22	11	2016-09-08	2016-09-22	animal	0	0	NA	NA	kudu	1	kudu	1	Natural	NA	1 A U	gentle	game trail	0	NA	NA
I_00004a.JPG		PB056_Cam11_8-22Sep_2016	2016-09-10	09:25:18	Ok	FALSE	Mila	PB	Spring	F3	PB056	-33.1363	17.9755	22	11	2016-09-08	2016-09-22	animal	0	0	NA	NA	unknown bird	1	unknown bird	1	Natural	NA	Unknown bird	gentle	game trail	0	NA	NA
I_00056a.JPG		PB059_Cam11_22Sep-6Oct_2016	2016-10-05	12:16:22	Ok	FALSE	Mila	PB	Spring	F4	PB059	-33.1382	17.9818	53	11	2016-09-22	2016-10-06	animal	0	0	NA	NA	black-headed heron	1	black-headed heron	1	Natural	NA	Age and sex unknown	gentle	footpath	1	NA	NA
I_00056b.JPG		PB059_Cam11_22Sep-6Oct_2016	2016-10-05	12:16:22	Ok	FALSE	Mila	PB	Spring	F4	PB059	-33.1382	17.9818	53	11	2016-09-22	2016-10-06	animal	0	0	NA	NA	black-headed heron	1	black-headed heron	1	Natural	NA	Age and sex unknown	gentle	footpath	1	NA	NA
I_00056c.JPG		PB059_Cam11_22Sep-6Oct_2016	2016-10-05	12:16:22	Ok	FALSE	Mila	PB	Spring	F4	PB059	-33.1382	17.9818	53	11	2016-09-22	2016-10-06	animal	0	0	NA	NA	black-headed heron	1	black-headed heron	1	Natural	NA	Age and sex unknown	gentle	footpath	1	NA	NA
I_00007a.JPG		PB059_Cam11_22Sep-6Oct_2016	2016-09-22	23:57:31	Ok	FALSE	Mila	PB	Spring	F4	PB059	-33.1382	17.9818	53	11	2016-09-22	2016-10-06	animal	0	0	NA	NA	eland	1	eland	1	Natural	NA	NA	gentle	footpath	1	NA	adult male
I_00044b.JPG		PB059_Cam11_22Sep-6Oct_2016	2016-09-28	13:24:21	Ok	FALSE	Mila	PB	Spring	F4	PB059	-33.1382	17.9818	53	11	2016-09-22	2016-10-06	animal	0	0	NA	NA	kelp gull	6	kelp gull	6	Natural	NA	Age and sex unknown	gentle	footpath	1	NA	NA
I_00044c.JPG		PB059_Cam11_22Sep-6Oct_2016	2016-09-28	13:24:21	Ok	FALSE	Mila	PB	Spring	F4	PB059	-33.1382	17.9818	53	11	2016-09-22	2016-10-06	animal	0	0	NA	NA	kelp gull	8	kelp gull	8	Natural	NA	Age and sex unknown	gentle	footpath	1	NA	NA
I_00045c.JPG		PB059_Cam11_22Sep-6Oct_2016	2016-09-28	13:24:45	Ok	FALSE	Mila	PB	Spring	F4	PB059	-33.1382	17.9818	53	11	2016-09-22	2016-10-06	animal	0	0	NA	NA	kelp gull	6	kelp gull	6	Natural	NA	Age and sex unknown	gentle	footpath	1	NA	NA
I_00045b.JPG		PB059_Cam11_22Sep-6Oct_2016	2016-09-28	13:24:45	Ok	FALSE	Mila	PB	Spring	F4	PB059	-33.1382	17.9818	53	11	2016-09-22	2016-10-06	animal	0	0	NA	NA	kelp gull	7	kelp gull	7	Natural	NA	Age and sex unknown	gentle	footpath	1	NA	NA
I_00053a.JPG		PB059_Cam11_22Sep-6Oct_2016	2016-10-03	00:26:28	Ok	FALSE	Mila	PB	Spring	F4	PB059	-33.1382	17.9818	53	11	2016-09-22	2016-10-06	animal	0	0	NA	NA	kudu	1	kudu	1	Natural	NA	Species unknown	gentle	footpath	1	NA	NA
I_00054a.JPG		PB059_Cam11_22Sep-6Oct_2016	2016-10-03	00:27:47	Ok	FALSE	Mila	PB	Spring	F4	PB059	-33.1382	17.9818	53	11	2016-09-22	2016-10-06	animal	0	0	NA	NA	kudu	1	kudu	1	Natural	NA	NA	gentle	footpath	1	NA	adult male
I_00054b.JPG		PB059_Cam11_22Sep-6Oct_2016	2016-10-03	00:27:47	Ok	FALSE	Mila	PB	Spring	F4	PB059	-33.1382	17.9818	53	11	2016-09-22	2016-10-06	animal	0	0	NA	NA	kudu	1	kudu	1	Natural	NA	NA	gentle	footpath	1	NA	adult male
I_00054c.JPG		PB059_Cam11_22Sep-6Oct_2016	2016-10-03	00:27:47	Ok	FALSE	Mila	PB	Spring	F4	PB059	-33.1382	17.9818	53	11	2016-09-22	2016-10-06	animal	0	0	NA	NA	kudu	1	kudu	1	Natural	NA	NA	gentle	footpath	1	NA	adult male
I_00055a.JPG		PB059_Cam11_22Sep-6Oct_2016	2016-10-03	02:22:23	Ok	FALSE	Mila	PB	Spring	F4	PB059	-33.1382	17.9818	53	11	2016-09-22	2016-10-06	animal	0	0	NA	NA	kudu	1	kudu	1	Natural	NA	NA	gentle	footpath	1	NA	adult male
I_00055b.JPG		PB059_Cam11_22Sep-6Oct_2016	2016-10-03	02:22:23	Ok	FALSE	Mila	PB	Spring	F4	PB059	-33.1382	17.9818	53	11	2016-09-22	2016-10-06	animal	0	0	NA	NA	kudu	1	kudu	1	Natural	NA	NA	gentle	footpath	1	NA	adult male
I_00055c.JPG		PB059_Cam11_22Sep-6Oct_2016	2016-10-03	02:22:23	Ok	FALSE	Mila	PB	Spring	F4	PB059	-33.1382	17.9818	53	11	2016-09-22	2016-10-06	animal	0	0	NA	NA	kudu	1	kudu	1	Natural	NA	NA	gentle	footpath	1	NA	adult male
I_00013a.JPG		PB059_Cam11_22Sep-6Oct_2016	2016-09-24	11:24:09	Ok	FALSE	Mila	PB	Spring	F4	PB059	-33.1382	17.9818	53	11	2016-09-22	2016-10-06	animal	0	0	NA	NA	ostrich	1	ostrich	1	Natural	NA	NA	gentle	footpath	1	NA	adult female
I_00013b.JPG		PB059_Cam11_22Sep-6Oct_2016	2016-09-24	11:24:09	Ok	FALSE	Mila	PB	Spring	F4	PB059	-33.1382	17.9818	53	11	2016-09-22	2016-10-06	animal	0	0	NA	NA	ostrich	1	ostrich	1	Natural	NA	NA	gentle	footpath	1	NA	adult female
I_00013c.JPG		PB059_Cam11_22Sep-6Oct_2016	2016-09-24	11:24:09	Ok	FALSE	Mila	PB	Spring	F4	PB059	-33.1382	17.9818	53	11	2016-09-22	2016-10-06	animal	0	0	NA	NA	ostrich	1	ostrich	1	Natural	NA	NA	gentle	footpath	1	NA	adult female
I_00014a.JPG		PB059_Cam11_22Sep-6Oct_2016	2016-09-24	11:24:31	Ok	FALSE	Mila	PB	Spring	F4	PB059	-33.1382	17.9818	53	11	2016-09-22	2016-10-06	animal	0	0	NA	NA	ostrich	1	ostrich	1	Natural	NA	NA	gentle	footpath	1	NA	adult female
I_00015a.JPG		PB059_Cam11_22Sep-6Oct_2016	2016-09-24	11:26:01	Ok	FALSE	Mila	PB	Spring	F4	PB059	-33.1382	17.9818	53	11	2016-09-22	2016-10-06	animal	0	0	NA	NA	ostrich	1	ostrich	1	Natural	NA	NA	gentle	footpath	1	NA	adult male
I_00015b.JPG		PB059_Cam11_22Sep-6Oct_2016	2016-09-24	11:26:01	Ok	FALSE	Mila	PB	Spring	F4	PB059	-33.1382	17.9818	53	11	2016-09-22	2016-10-06	animal	0	0	NA	NA	ostrich	1	ostrich	1	Natural	NA	NA	gentle	footpath	1	NA	adult male
I_00015c.JPG		PB059_Cam11_22Sep-6Oct_2016	2016-09-24	11:26:01	Ok	FALSE	Mila	PB	Spring	F4	PB059	-33.1382	17.9818	53	11	2016-09-22	2016-10-06	animal	0	0	NA	NA	ostrich	1	ostrich	1	Natural	NA	NA	gentle	footpath	1	NA	adult male
I_00079a.JPG		PB063_Cam13_8-22Sep_2016	2016-09-14	19:55:00	Ok	FALSE	Mila	PB	Spring	F5	PB063	-33.1295	17.9904	31	13	2016-09-08	2016-09-22	animal	0	0	NA	NA	blue wildebeest	1	blue wildebeest	1	Natural	NA	Species unknown	flat	game trail	0	NA	NA
I_00053a.JPG		PB063_Cam13_8-22Sep_2016	2016-09-11	15:59:35	Ok	FALSE	Mila	PB	Spring	F5	PB063	-33.1295	17.9904	31	13	2016-09-08	2016-09-22	animal	0	0	NA	NA	bontebok	1	bontebok	1	Natural	NA	1 A U	flat	game trail	0	NA	NA
I_00065a.JPG		PB063_Cam13_8-22Sep_2016	2016-09-13	08:08:27	Ok	FALSE	Mila	PB	Spring	F5	PB063	-33.1295	17.9904	31	13	2016-09-08	2016-09-22	animal	0	0	NA	NA	bontebok	1	bontebok	1	Natural	NA	1 A U	flat	game trail	0	NA	NA
I_00065b.JPG		PB063_Cam13_8-22Sep_2016	2016-09-13	08:08:27	Ok	FALSE	Mila	PB	Spring	F5	PB063	-33.1295	17.9904	31	13	2016-09-08	2016-09-22	animal	0	0	NA	NA	bontebok	1	bontebok	1	Natural	NA	1 A U	flat	game trail	0	NA	NA
I_00065c.JPG		PB063_Cam13_8-22Sep_2016	2016-09-13	08:08:27	Ok	FALSE	Mila	PB	Spring	F5	PB063	-33.1295	17.9904	31	13	2016-09-08	2016-09-22	animal	0	0	NA	NA	bontebok	1	bontebok	1	Natural	NA	1 A U	flat	game trail	0	NA	NA
I_00075a.JPG		PB063_Cam13_8-22Sep_2016	2016-09-14	13:09:56	Ok	FALSE	Mila	PB	Spring	F5	PB063	-33.1295	17.9904	31	13	2016-09-08	2016-09-22	animal	0	0	NA	NA	bontebok	1	bontebok	1	Natural	NA	1 A U	flat	game trail	0	NA	NA
I_00075b.JPG		PB063_Cam13_8-22Sep_2016	2016-09-14	13:09:56	Ok	FALSE	Mila	PB	Spring	F5	PB063	-33.1295	17.9904	31	13	2016-09-08	2016-09-22	animal	0	0	NA	NA	bontebok	1	bontebok	1	Natural	NA	1 A U	flat	game trail	0	NA	NA
I_00076a.JPG		PB063_Cam13_8-22Sep_2016	2016-09-14	15:05:22	Ok	FALSE	Mila	PB	Spring	F5	PB063	-33.1295	17.9904	31	13	2016-09-08	2016-09-22	animal	0	0	NA	NA	bontebok	1	bontebok	1	Natural	NA	1 A U	flat	game trail	0	NA	NA
I_00076b.JPG		PB063_Cam13_8-22Sep_2016	2016-09-14	15:05:22	Ok	FALSE	Mila	PB	Spring	F5	PB063	-33.1295	17.9904	31	13	2016-09-08	2016-09-22	animal	0	0	NA	NA	bontebok	1	bontebok	1	Natural	NA	1 A U	flat	game trail	0	NA	NA
I_00076c.JPG		PB063_Cam13_8-22Sep_2016	2016-09-14	15:05:22	Ok	FALSE	Mila	PB	Spring	F5	PB063	-33.1295	17.9904	31	13	2016-09-08	2016-09-22	animal	0	0	NA	NA	bontebok	1	bontebok	1	Natural	NA	1 A U	flat	game trail	0	NA	NA
I_00106b.JPG		PB063_Cam13_8-22Sep_2016	2016-09-21	09:36:34	Ok	FALSE	Mila	PB	Spring	F5	PB063	-33.1295	17.9904	31	13	2016-09-08	2016-09-22	animal	0	0	NA	NA	bontebok	1	bontebok	1	Natural	NA	1 A U	flat	game trail	0	NA	NA
I_00106c.JPG		PB063_Cam13_8-22Sep_2016	2016-09-21	09:36:34	Ok	FALSE	Mila	PB	Spring	F5	PB063	-33.1295	17.9904	31	13	2016-09-08	2016-09-22	animal	0	0	NA	NA	bontebok	1	bontebok	1	Natural	NA	1 A U	flat	game trail	0	NA	NA
I_00042a.JPG		PB063_Cam13_8-22Sep_2016	2016-09-10	07:50:37	Ok	FALSE	Mila	PB	Spring	F5	PB063	-33.1295	17.9904	31	13	2016-09-08	2016-09-22	animal	0	0	NA	NA	common duiker	1	common duiker	1	Natural	NA	1 A U	flat	game trail	0	NA	NA
I_00056a.JPG		PB063_Cam13_8-22Sep_2016	2016-09-11	18:53:48	Ok	FALSE	Mila	PB	Spring	F5	PB063	-33.1295	17.9904	31	13	2016-09-08	2016-09-22	animal	0	0	NA	NA	common duiker	1	common duiker	1	Natural	NA	NA	flat	game trail	0	NA	adult male
I_00056b.JPG		PB063_Cam13_8-22Sep_2016	2016-09-11	18:53:48	Ok	FALSE	Mila	PB	Spring	F5	PB063	-33.1295	17.9904	31	13	2016-09-08	2016-09-22	animal	0	0	NA	NA	common duiker	1	common duiker	1	Natural	NA	NA	flat	game trail	0	NA	adult male
I_00056c.JPG		PB063_Cam13_8-22Sep_2016	2016-09-11	18:53:48	Ok	FALSE	Mila	PB	Spring	F5	PB063	-33.1295	17.9904	31	13	2016-09-08	2016-09-22	animal	0	0	NA	NA	common duiker	1	common duiker	1	Natural	NA	NA	flat	game trail	0	NA	adult male
I_00056d.JPG		PB063_Cam13_8-22Sep_2016	2016-09-11	18:53:48	Ok	FALSE	Mila	PB	Spring	F5	PB063	-33.1295	17.9904	31	13	2016-09-08	2016-09-22	animal	0	0	NA	NA	common duiker	1	common duiker	1	Natural	NA	NA	flat	game trail	0	NA	adult male
I_00062a.JPG		PB063_Cam13_8-22Sep_2016	2016-09-12	16:42:33	Ok	FALSE	Mila	PB	Spring	F5	PB063	-33.1295	17.9904	31	13	2016-09-08	2016-09-22	animal	0	0	NA	NA	common duiker	1	common duiker	1	Natural	NA	NA	flat	game trail	0	NA	adult female
I_00062b.JPG		PB063_Cam13_8-22Sep_2016	2016-09-12	16:42:33	Ok	FALSE	Mila	PB	Spring	F5	PB063	-33.1295	17.9904	31	13	2016-09-08	2016-09-22	animal	0	0	NA	NA	common duiker	1	common duiker	1	Natural	NA	NA	flat	game trail	0	NA	adult female
I_00062c.JPG		PB063_Cam13_8-22Sep_2016	2016-09-12	16:42:33	Ok	FALSE	Mila	PB	Spring	F5	PB063	-33.1295	17.9904	31	13	2016-09-08	2016-09-22	animal	0	0	NA	NA	common duiker	1	common duiker	1	Natural	NA	NA	flat	game trail	0	NA	adult female
I_00063a.JPG		PB063_Cam13_8-22Sep_2016	2016-09-12	16:45:12	Ok	FALSE	Mila	PB	Spring	F5	PB063	-33.1295	17.9904	31	13	2016-09-08	2016-09-22	animal	0	0	NA	NA	common duiker	1	common duiker	1	Natural	NA	NA	flat	game trail	0	NA	adult male
I_00063b.JPG		PB063_Cam13_8-22Sep_2016	2016-09-12	16:45:12	Ok	FALSE	Mila	PB	Spring	F5	PB063	-33.1295	17.9904	31	13	2016-09-08	2016-09-22	animal	0	0	NA	NA	common duiker	1	common duiker	1	Natural	NA	NA	flat	game trail	0	NA	adult female
I_00063c.JPG		PB063_Cam13_8-22Sep_2016	2016-09-12	16:45:12	Ok	FALSE	Mila	PB	Spring	F5	PB063	-33.1295	17.9904	31	13	2016-09-08	2016-09-22	animal	0	0	NA	NA	common duiker	1	common duiker	1	Natural	NA	NA	flat	game trail	0	NA	adult male
I_00064a.JPG		PB063_Cam13_8-22Sep_2016	2016-09-12	19:24:59	Ok	FALSE	Mila	PB	Spring	F5	PB063	-33.1295	17.9904	31	13	2016-09-08	2016-09-22	animal	0	0	NA	NA	common duiker	1	common duiker	1	Natural	NA	NA	flat	game trail	0	NA	adult female
I_00064b.JPG		PB063_Cam13_8-22Sep_2016	2016-09-12	19:24:59	Ok	FALSE	Mila	PB	Spring	F5	PB063	-33.1295	17.9904	31	13	2016-09-08	2016-09-22	animal	0	0	NA	NA	common duiker	1	common duiker	1	Natural	NA	NA	flat	game trail	0	NA	adult male
I_00064c.JPG		PB063_Cam13_8-22Sep_2016	2016-09-12	19:24:59	Ok	FALSE	Mila	PB	Spring	F5	PB063	-33.1295	17.9904	31	13	2016-09-08	2016-09-22	animal	0	0	NA	NA	common duiker	1	common duiker	1	Natural	NA	NA	flat	game trail	0	NA	adult male
I_00064d.JPG		PB063_Cam13_8-22Sep_2016	2016-09-12	19:24:59	Ok	FALSE	Mila	PB	Spring	F5	PB063	-33.1295	17.9904	31	13	2016-09-08	2016-09-22	animal	0	0	NA	NA	common duiker	1	common duiker	1	Natural	NA	NA	flat	game trail	0	NA	adult male
I_00081a.JPG		PB063_Cam13_8-22Sep_2016	2016-09-15	07:53:13	Ok	FALSE	Mila	PB	Spring	F5	PB063	-33.1295	17.9904	31	13	2016-09-08	2016-09-22	animal	0	0	NA	NA	common duiker	1	common duiker	1	Natural	NA	NA	flat	game trail	0	NA	adult male
I_00081b.JPG		PB063_Cam13_8-22Sep_2016	2016-09-15	07:53:13	Ok	FALSE	Mila	PB	Spring	F5	PB063	-33.1295	17.9904	31	13	2016-09-08	2016-09-22	animal	0	0	NA	NA	common duiker	1	common duiker	1	Natural	NA	NA	flat	game trail	0	NA	adult male
I_00093a.JPG		PB063_Cam13_8-22Sep_2016	2016-09-17	23:52:08	Ok	FALSE	Mila	PB	Spring	F5	PB063	-33.1295	17.9904	31	13	2016-09-08	2016-09-22	animal	0	0	NA	NA	common duiker	1	common duiker	1	Natural	NA	Species unknown	flat	game trail	0	NA	NA
I_00093b.JPG		PB063_Cam13_8-22Sep_2016	2016-09-17	23:52:08	Ok	FALSE	Mila	PB	Spring	F5	PB063	-33.1295	17.9904	31	13	2016-09-08	2016-09-22	animal	0	0	NA	NA	common duiker	1	common duiker	1	Natural	NA	Species unknown	flat	game trail	0	NA	NA
I_00101a.JPG		PB063_Cam13_8-22Sep_2016	2016-09-19	21:14:00	Ok	FALSE	Mila	PB	Spring	F5	PB063	-33.1295	17.9904	31	13	2016-09-08	2016-09-22	animal	0	0	NA	NA	common duiker	1	common duiker	1	Natural	NA	1 A U	flat	game trail	0	NA	NA
I_00102a.JPG		PB063_Cam13_8-22Sep_2016	2016-09-20	06:28:36	Ok	FALSE	Mila	PB	Spring	F5	PB063	-33.1295	17.9904	31	13	2016-09-08	2016-09-22	animal	0	0	NA	NA	common duiker	1	common duiker	1	Natural	NA	1 A U	flat	game trail	0	NA	NA
I_00105a.JPG		PB063_Cam13_8-22Sep_2016	2016-09-20	22:36:18	Ok	FALSE	Mila	PB	Spring	F5	PB063	-33.1295	17.9904	31	13	2016-09-08	2016-09-22	animal	0	0	NA	NA	common duiker	1	common duiker	1	Natural	NA	NA	flat	game trail	0	NA	adult male
I_00107a.JPG		PB063_Cam13_8-22Sep_2016	2016-09-21	19:51:48	Ok	FALSE	Mila	PB	Spring	F5	PB063	-33.1295	17.9904	31	13	2016-09-08	2016-09-22	animal	0	0	NA	NA	common duiker	1	common duiker	1	Natural	NA	NA	flat	game trail	0	NA	adult female
I_00107b.JPG		PB063_Cam13_8-22Sep_2016	2016-09-21	19:51:48	Ok	FALSE	Mila	PB	Spring	F5	PB063	-33.1295	17.9904	31	13	2016-09-08	2016-09-22	animal	0	0	NA	NA	common duiker	1	common duiker	1	Natural	NA	NA	flat	game trail	0	NA	adult female
I_00107c.JPG		PB063_Cam13_8-22Sep_2016	2016-09-21	19:51:48	Ok	FALSE	Mila	PB	Spring	F5	PB063	-33.1295	17.9904	31	13	2016-09-08	2016-09-22	animal	0	0	NA	NA	common duiker	1	common duiker	1	Natural	NA	NA	flat	game trail	0	NA	adult female
I_00061a.JPG		PB063_Cam13_8-22Sep_2016	2016-09-12	12:08:39	Ok	FALSE	Mila	PB	Spring	F5	PB063	-33.1295	17.9904	31	13	2016-09-08	2016-09-22	animal	0	0	NA	NA	eland	1	eland	1	Natural	NA	NA	flat	game trail	0	NA	adult male
I_00061b.JPG		PB063_Cam13_8-22Sep_2016	2016-09-12	12:08:39	Ok	FALSE	Mila	PB	Spring	F5	PB063	-33.1295	17.9904	31	13	2016-09-08	2016-09-22	animal	0	0	NA	NA	eland	1	eland	1	Natural	NA	NA	flat	game trail	0	NA	adult male
I_00061c.JPG		PB063_Cam13_8-22Sep_2016	2016-09-12	12:08:39	Ok	FALSE	Mila	PB	Spring	F5	PB063	-33.1295	17.9904	31	13	2016-09-08	2016-09-22	animal	0	0	NA	NA	eland	1	eland	1	Natural	NA	NA	flat	game trail	0	NA	adult male
I_00085a.JPG		PB063_Cam13_8-22Sep_2016	2016-09-16	18:12:50	Ok	FALSE	Mila	PB	Spring	F5	PB063	-33.1295	17.9904	31	13	2016-09-08	2016-09-22	animal	0	0	NA	NA	eland	1	eland	1	Natural	NA	NA	flat	game trail	0	NA	adult male
I_00086c.JPG		PB063_Cam13_8-22Sep_2016	2016-09-17	07:20:57	Ok	FALSE	Mila	PB	Spring	F5	PB063	-33.1295	17.9904	31	13	2016-09-08	2016-09-22	animal	0	0	NA	NA	eland	1	eland	1	Natural	NA	NA	flat	game trail	0	NA	adult male
I_00086a.JPG		PB063_Cam13_8-22Sep_2016	2016-09-17	07:20:57	Ok	FALSE	Mila	PB	Spring	F5	PB063	-33.1295	17.9904	31	13	2016-09-08	2016-09-22	animal	0	0	NA	NA	eland	2	eland	2	Natural	NA	1 A M, 1 A U	flat	game trail	0	NA	NA
I_00086b.JPG		PB063_Cam13_8-22Sep_2016	2016-09-17	07:20:57	Ok	FALSE	Mila	PB	Spring	F5	PB063	-33.1295	17.9904	31	13	2016-09-08	2016-09-22	animal	0	0	NA	NA	eland	2	eland	2	Natural	NA	1 A M, 1 A U	flat	game trail	0	NA	NA
I_00087a.JPG		PB063_Cam13_8-22Sep_2016	2016-09-17	07:21:20	Ok	FALSE	Mila	PB	Spring	F5	PB063	-33.1295	17.9904	31	13	2016-09-08	2016-09-22	animal	0	0	NA	NA	eland	1	eland	1	Natural	NA	NA	flat	game trail	0	NA	adult male
I_00087b.JPG		PB063_Cam13_8-22Sep_2016	2016-09-17	07:21:20	Ok	FALSE	Mila	PB	Spring	F5	PB063	-33.1295	17.9904	31	13	2016-09-08	2016-09-22	animal	0	0	NA	NA	eland	1	eland	1	Natural	NA	NA	flat	game trail	0	NA	adult male
I_00087c.JPG		PB063_Cam13_8-22Sep_2016	2016-09-17	07:21:20	Ok	FALSE	Mila	PB	Spring	F5	PB063	-33.1295	17.9904	31	13	2016-09-08	2016-09-22	animal	0	0	NA	NA	eland	1	eland	1	Natural	NA	NA	flat	game trail	0	NA	adult male
I_00088a.JPG		PB063_Cam13_8-22Sep_2016	2016-09-17	07:21:44	Ok	FALSE	Mila	PB	Spring	F5	PB063	-33.1295	17.9904	31	13	2016-09-08	2016-09-22	animal	0	0	NA	NA	eland	3	eland	3	Natural	NA	1 A F, 2 A M	flat	game trail	0	NA	NA
I_00088b.JPG		PB063_Cam13_8-22Sep_2016	2016-09-17	07:21:44	Ok	FALSE	Mila	PB	Spring	F5	PB063	-33.1295	17.9904	31	13	2016-09-08	2016-09-22	animal	0	0	NA	NA	eland	3	eland	3	Natural	NA	1 A F, 2 A M	flat	game trail	0	NA	NA
I_00088c.JPG		PB063_Cam13_8-22Sep_2016	2016-09-17	07:21:44	Ok	FALSE	Mila	PB	Spring	F5	PB063	-33.1295	17.9904	31	13	2016-09-08	2016-09-22	animal	0	0	NA	NA	eland	3	eland	3	Natural	NA	1 A F, 2 A M	flat	game trail	0	NA	NA
I_00089b.JPG		PB063_Cam13_8-22Sep_2016	2016-09-17	07:22:06	Ok	FALSE	Mila	PB	Spring	F5	PB063	-33.1295	17.9904	31	13	2016-09-08	2016-09-22	animal	0	0	NA	NA	eland	1	eland	1	Natural	NA	NA	flat	game trail	0	NA	adult male
I_00089c.JPG		PB063_Cam13_8-22Sep_2016	2016-09-17	07:22:06	Ok	FALSE	Mila	PB	Spring	F5	PB063	-33.1295	17.9904	31	13	2016-09-08	2016-09-22	animal	0	0	NA	NA	eland	1	eland	1	Natural	NA	NA	flat	game trail	0	NA	adult male
I_00089a.JPG		PB063_Cam13_8-22Sep_2016	2016-09-17	07:22:06	Ok	FALSE	Mila	PB	Spring	F5	PB063	-33.1295	17.9904	31	13	2016-09-08	2016-09-22	animal	0	0	NA	NA	eland	2	eland	2	Natural	NA	NA	flat	game trail	0	NA	adult male
I_00090a.JPG		PB063_Cam13_8-22Sep_2016	2016-09-17	07:22:44	Ok	FALSE	Mila	PB	Spring	F5	PB063	-33.1295	17.9904	31	13	2016-09-08	2016-09-22	animal	0	0	NA	NA	eland	2	eland	2	Natural	NA	1 A M, 1 A U	flat	game trail	0	NA	NA
I_00090b.JPG		PB063_Cam13_8-22Sep_2016	2016-09-17	07:22:44	Ok	FALSE	Mila	PB	Spring	F5	PB063	-33.1295	17.9904	31	13	2016-09-08	2016-09-22	animal	0	0	NA	NA	eland	2	eland	2	Natural	NA	1 A M, 1 A U	flat	game trail	0	NA	NA
I_00090c.JPG		PB063_Cam13_8-22Sep_2016	2016-09-17	07:22:44	Ok	FALSE	Mila	PB	Spring	F5	PB063	-33.1295	17.9904	31	13	2016-09-08	2016-09-22	animal	0	0	NA	NA	eland	2	eland	2	Natural	NA	1 a M, 1 A U	flat	game trail	0	NA	NA
I_00091a.JPG		PB063_Cam13_8-22Sep_2016	2016-09-17	07:23:07	Ok	FALSE	Mila	PB	Spring	F5	PB063	-33.1295	17.9904	31	13	2016-09-08	2016-09-22	animal	0	0	NA	NA	eland	1	eland	1	Natural	NA	NA	flat	game trail	0	NA	adult male
I_00091b.JPG		PB063_Cam13_8-22Sep_2016	2016-09-17	07:23:07	Ok	FALSE	Mila	PB	Spring	F5	PB063	-33.1295	17.9904	31	13	2016-09-08	2016-09-22	animal	0	0	NA	NA	eland	1	eland	1	Natural	NA	NA	flat	game trail	0	NA	adult male
I_00092a.JPG		PB063_Cam13_8-22Sep_2016	2016-09-17	07:24:08	Ok	FALSE	Mila	PB	Spring	F5	PB063	-33.1295	17.9904	31	13	2016-09-08	2016-09-22	animal	0	0	NA	NA	eland	1	eland	1	Natural	NA	NA	flat	game trail	0	NA	adult male
I_00092b.JPG		PB063_Cam13_8-22Sep_2016	2016-09-17	07:24:08	Ok	FALSE	Mila	PB	Spring	F5	PB063	-33.1295	17.9904	31	13	2016-09-08	2016-09-22	animal	0	0	NA	NA	eland	1	eland	1	Natural	NA	NA	flat	game trail	0	NA	adult male
I_00092c.JPG		PB063_Cam13_8-22Sep_2016	2016-09-17	07:24:08	Ok	FALSE	Mila	PB	Spring	F5	PB063	-33.1295	17.9904	31	13	2016-09-08	2016-09-22	animal	0	0	NA	NA	eland	1	eland	1	Natural	NA	NA	flat	game trail	0	NA	adult male
I_00095a.JPG		PB063_Cam13_8-22Sep_2016	2016-09-18	02:08:13	Ok	FALSE	Mila	PB	Spring	F5	PB063	-33.1295	17.9904	31	13	2016-09-08	2016-09-22	animal	0	0	NA	NA	eland	1	eland	1	Natural	NA	Species unknown	flat	game trail	0	NA	NA
I_00058a.JPG		PB063_Cam13_8-22Sep_2016	2016-09-12	02:35:39	Ok	FALSE	Mila	PB	Spring	F5	PB063	-33.1295	17.9904	31	13	2016-09-08	2016-09-22	animal	0	0	NA	NA	gemsbok	1	gemsbok	1	Natural	NA	Species unknown	flat	game trail	0	NA	NA
I_00001a.JPG		PB063_Cam13_8-22Sep_2016	2016-09-08	16:54:48	Ok	FALSE	Mila	PB	Spring	F5	PB063	-33.1295	17.9904	31	13	2016-09-08	2016-09-22	animal	0	0	NA	NA	kudu	1	kudu	1	Natural	NA	NA	flat	game trail	0	NA	adult female
I_00001b.JPG		PB063_Cam13_8-22Sep_2016	2016-09-08	16:54:48	Ok	FALSE	Mila	PB	Spring	F5	PB063	-33.1295	17.9904	31	13	2016-09-08	2016-09-22	animal	0	0	NA	NA	kudu	1	kudu	1	Natural	NA	NA	flat	game trail	0	NA	adult female
I_00001c.JPG		PB063_Cam13_8-22Sep_2016	2016-09-08	16:54:48	Ok	FALSE	Mila	PB	Spring	F5	PB063	-33.1295	17.9904	31	13	2016-09-08	2016-09-22	animal	0	0	NA	NA	kudu	1	kudu	1	Natural	NA	NA	flat	game trail	0	NA	adult female
I_00017a.JPG		PB063_Cam13_8-22Sep_2016	2016-09-09	18:10:10	Ok	FALSE	Mila	PB	Spring	F5	PB063	-33.1295	17.9904	31	13	2016-09-08	2016-09-22	animal	0	0	NA	NA	kudu	1	kudu	1	Natural	NA	NA	flat	game trail	0	NA	adult male
I_00017b.JPG		PB063_Cam13_8-22Sep_2016	2016-09-09	18:10:10	Ok	FALSE	Mila	PB	Spring	F5	PB063	-33.1295	17.9904	31	13	2016-09-08	2016-09-22	animal	0	0	NA	NA	kudu	1	kudu	1	Natural	NA	NA	flat	game trail	0	NA	adult male
I_00017c.JPG		PB063_Cam13_8-22Sep_2016	2016-09-09	18:10:10	Ok	FALSE	Mila	PB	Spring	F5	PB063	-33.1295	17.9904	31	13	2016-09-08	2016-09-22	animal	0	0	NA	NA	kudu	1	kudu	1	Natural	NA	NA	flat	game trail	0	NA	adult male
I_00018b.JPG		PB063_Cam13_8-22Sep_2016	2016-09-09	18:12:55	Ok	FALSE	Mila	PB	Spring	F5	PB063	-33.1295	17.9904	31	13	2016-09-08	2016-09-22	animal	0	0	NA	NA	kudu	1	kudu	1	Natural	NA	NA	flat	game trail	0	NA	adult male
I_00018c.JPG		PB063_Cam13_8-22Sep_2016	2016-09-09	18:12:55	Ok	FALSE	Mila	PB	Spring	F5	PB063	-33.1295	17.9904	31	13	2016-09-08	2016-09-22	animal	0	0	NA	NA	kudu	1	kudu	1	Natural	NA	NA	flat	game trail	0	NA	adult male
I_00019a.JPG		PB063_Cam13_8-22Sep_2016	2016-09-09	20:43:44	Ok	FALSE	Mila	PB	Spring	F5	PB063	-33.1295	17.9904	31	13	2016-09-08	2016-09-22	animal	0	0	NA	NA	kudu	1	kudu	1	Natural	NA	NA	flat	game trail	0	NA	adult male
I_00019b.JPG		PB063_Cam13_8-22Sep_2016	2016-09-09	20:43:44	Ok	FALSE	Mila	PB	Spring	F5	PB063	-33.1295	17.9904	31	13	2016-09-08	2016-09-22	animal	0	0	NA	NA	kudu	1	kudu	1	Natural	NA	NA	flat	game trail	0	NA	adult male
I_00019c.JPG		PB063_Cam13_8-22Sep_2016	2016-09-09	20:43:44	Ok	FALSE	Mila	PB	Spring	F5	PB063	-33.1295	17.9904	31	13	2016-09-08	2016-09-22	animal	0	0	NA	NA	kudu	1	kudu	1	Natural	NA	NA	flat	game trail	0	NA	adult male
I_00019d.JPG		PB063_Cam13_8-22Sep_2016	2016-09-09	20:43:44	Ok	FALSE	Mila	PB	Spring	F5	PB063	-33.1295	17.9904	31	13	2016-09-08	2016-09-22	animal	0	0	NA	NA	kudu	1	kudu	1	Natural	NA	NA	flat	game trail	0	NA	adult male
I_00020a.JPG		PB063_Cam13_8-22Sep_2016	2016-09-09	20:44:14	Ok	FALSE	Mila	PB	Spring	F5	PB063	-33.1295	17.9904	31	13	2016-09-08	2016-09-22	animal	0	0	NA	NA	kudu	1	kudu	1	Natural	NA	NA	flat	game trail	0	NA	adult male
I_00020b.JPG		PB063_Cam13_8-22Sep_2016	2016-09-09	20:44:14	Ok	FALSE	Mila	PB	Spring	F5	PB063	-33.1295	17.9904	31	13	2016-09-08	2016-09-22	animal	0	0	NA	NA	kudu	1	kudu	1	Natural	NA	NA	flat	game trail	0	NA	adult male
I_00020c.JPG		PB063_Cam13_8-22Sep_2016	2016-09-09	20:44:14	Ok	FALSE	Mila	PB	Spring	F5	PB063	-33.1295	17.9904	31	13	2016-09-08	2016-09-22	animal	0	0	NA	NA	kudu	1	kudu	1	Natural	NA	NA	flat	game trail	0	NA	adult male
I_00020d.JPG		PB063_Cam13_8-22Sep_2016	2016-09-09	20:44:14	Ok	FALSE	Mila	PB	Spring	F5	PB063	-33.1295	17.9904	31	13	2016-09-08	2016-09-22	animal	0	0	NA	NA	kudu	2	kudu	2	Natural	NA	NA	flat	game trail	0	NA	adult male
I_00021a.JPG		PB063_Cam13_8-22Sep_2016	2016-09-09	20:44:52	Ok	FALSE	Mila	PB	Spring	F5	PB063	-33.1295	17.9904	31	13	2016-09-08	2016-09-22	animal	0	0	NA	NA	kudu	1	kudu	1	Natural	NA	NA	flat	game trail	0	NA	adult male
I_00023a.JPG		PB063_Cam13_8-22Sep_2016	2016-09-09	20:47:54	Ok	FALSE	Mila	PB	Spring	F5	PB063	-33.1295	17.9904	31	13	2016-09-08	2016-09-22	animal	0	0	NA	NA	kudu	1	kudu	1	Natural	NA	NA	flat	game trail	0	NA	adult male
I_00023b.JPG		PB063_Cam13_8-22Sep_2016	2016-09-09	20:47:54	Ok	FALSE	Mila	PB	Spring	F5	PB063	-33.1295	17.9904	31	13	2016-09-08	2016-09-22	animal	0	0	NA	NA	kudu	1	kudu	1	Natural	NA	NA	flat	game trail	0	NA	adult male
I_00023c.JPG		PB063_Cam13_8-22Sep_2016	2016-09-09	20:47:54	Ok	FALSE	Mila	PB	Spring	F5	PB063	-33.1295	17.9904	31	13	2016-09-08	2016-09-22	animal	0	0	NA	NA	kudu	1	kudu	1	Natural	NA	NA	flat	game trail	0	NA	adult male
I_00023d.JPG		PB063_Cam13_8-22Sep_2016	2016-09-09	20:47:54	Ok	FALSE	Mila	PB	Spring	F5	PB063	-33.1295	17.9904	31	13	2016-09-08	2016-09-22	animal	0	0	NA	NA	kudu	1	kudu	1	Natural	NA	NA	flat	game trail	0	NA	adult male
I_00024a.JPG		PB063_Cam13_8-22Sep_2016	2016-09-09	20:49:14	Ok	FALSE	Mila	PB	Spring	F5	PB063	-33.1295	17.9904	31	13	2016-09-08	2016-09-22	animal	0	0	NA	NA	kudu	1	kudu	1	Natural	NA	NA	flat	game trail	0	NA	adult male
I_00024b.JPG		PB063_Cam13_8-22Sep_2016	2016-09-09	20:49:14	Ok	FALSE	Mila	PB	Spring	F5	PB063	-33.1295	17.9904	31	13	2016-09-08	2016-09-22	animal	0	0	NA	NA	kudu	1	kudu	1	Natural	NA	NA	flat	game trail	0	NA	adult male
I_00024c.JPG		PB063_Cam13_8-22Sep_2016	2016-09-09	20:49:14	Ok	FALSE	Mila	PB	Spring	F5	PB063	-33.1295	17.9904	31	13	2016-09-08	2016-09-22	animal	0	0	NA	NA	kudu	1	kudu	1	Natural	NA	NA	flat	game trail	0	NA	adult male
I_00024d.JPG		PB063_Cam13_8-22Sep_2016	2016-09-09	20:49:14	Ok	FALSE	Mila	PB	Spring	F5	PB063	-33.1295	17.9904	31	13	2016-09-08	2016-09-22	animal	0	0	NA	NA	kudu	1	kudu	1	Natural	NA	NA	flat	game trail	0	NA	adult male
I_00025a.JPG		PB063_Cam13_8-22Sep_2016	2016-09-09	20:50:06	Ok	FALSE	Mila	PB	Spring	F5	PB063	-33.1295	17.9904	31	13	2016-09-08	2016-09-22	animal	0	0	NA	NA	kudu	1	kudu	1	Natural	NA	NA	flat	game trail	0	NA	adult male
I_00025b.JPG		PB063_Cam13_8-22Sep_2016	2016-09-09	20:50:06	Ok	FALSE	Mila	PB	Spring	F5	PB063	-33.1295	17.9904	31	13	2016-09-08	2016-09-22	animal	0	0	NA	NA	kudu	1	kudu	1	Natural	NA	NA	flat	game trail	0	NA	adult male
I_00025c.JPG		PB063_Cam13_8-22Sep_2016	2016-09-09	20:50:06	Ok	FALSE	Mila	PB	Spring	F5	PB063	-33.1295	17.9904	31	13	2016-09-08	2016-09-22	animal	0	0	NA	NA	kudu	1	kudu	1	Natural	NA	NA	flat	game trail	0	NA	adult male
I_00025d.JPG		PB063_Cam13_8-22Sep_2016	2016-09-09	20:50:06	Ok	FALSE	Mila	PB	Spring	F5	PB063	-33.1295	17.9904	31	13	2016-09-08	2016-09-22	animal	0	0	NA	NA	kudu	1	kudu	1	Natural	NA	NA	flat	game trail	0	NA	adult male
I_00026a.JPG		PB063_Cam13_8-22Sep_2016	2016-09-09	20:50:42	Ok	FALSE	Mila	PB	Spring	F5	PB063	-33.1295	17.9904	31	13	2016-09-08	2016-09-22	animal	0	0	NA	NA	kudu	1	kudu	1	Natural	NA	NA	flat	game trail	0	NA	adult male
I_00026b.JPG		PB063_Cam13_8-22Sep_2016	2016-09-09	20:50:42	Ok	FALSE	Mila	PB	Spring	F5	PB063	-33.1295	17.9904	31	13	2016-09-08	2016-09-22	animal	0	0	NA	NA	kudu	1	kudu	1	Natural	NA	NA	flat	game trail	0	NA	adult male
I_00026c.JPG		PB063_Cam13_8-22Sep_2016	2016-09-09	20:50:42	Ok	FALSE	Mila	PB	Spring	F5	PB063	-33.1295	17.9904	31	13	2016-09-08	2016-09-22	animal	0	0	NA	NA	kudu	1	kudu	1	Natural	NA	NA	flat	game trail	0	NA	adult male
I_00026d.JPG		PB063_Cam13_8-22Sep_2016	2016-09-09	20:50:42	Ok	FALSE	Mila	PB	Spring	F5	PB063	-33.1295	17.9904	31	13	2016-09-08	2016-09-22	animal	0	0	NA	NA	kudu	1	kudu	1	Natural	NA	NA	flat	game trail	0	NA	adult male
I_00027a.JPG		PB063_Cam13_8-22Sep_2016	2016-09-09	20:51:15	Ok	FALSE	Mila	PB	Spring	F5	PB063	-33.1295	17.9904	31	13	2016-09-08	2016-09-22	animal	0	0	NA	NA	kudu	1	kudu	1	Natural	NA	NA	flat	game trail	0	NA	adult male
I_00027b.JPG		PB063_Cam13_8-22Sep_2016	2016-09-09	20:51:15	Ok	FALSE	Mila	PB	Spring	F5	PB063	-33.1295	17.9904	31	13	2016-09-08	2016-09-22	animal	0	0	NA	NA	kudu	1	kudu	1	Natural	NA	NA	flat	game trail	0	NA	adult male
I_00027c.JPG		PB063_Cam13_8-22Sep_2016	2016-09-09	20:51:15	Ok	FALSE	Mila	PB	Spring	F5	PB063	-33.1295	17.9904	31	13	2016-09-08	2016-09-22	animal	0	0	NA	NA	kudu	1	kudu	1	Natural	NA	NA	flat	game trail	0	NA	adult male
I_00027d.JPG		PB063_Cam13_8-22Sep_2016	2016-09-09	20:51:15	Ok	FALSE	Mila	PB	Spring	F5	PB063	-33.1295	17.9904	31	13	2016-09-08	2016-09-22	animal	0	0	NA	NA	kudu	1	kudu	1	Natural	NA	NA	flat	game trail	0	NA	adult male
I_00028a.JPG		PB063_Cam13_8-22Sep_2016	2016-09-09	20:52:07	Ok	FALSE	Mila	PB	Spring	F5	PB063	-33.1295	17.9904	31	13	2016-09-08	2016-09-22	animal	0	0	NA	NA	kudu	1	kudu	1	Natural	NA	NA	flat	game trail	0	NA	adult male
I_00028b.JPG		PB063_Cam13_8-22Sep_2016	2016-09-09	20:52:07	Ok	FALSE	Mila	PB	Spring	F5	PB063	-33.1295	17.9904	31	13	2016-09-08	2016-09-22	animal	0	0	NA	NA	kudu	1	kudu	1	Natural	NA	NA	flat	game trail	0	NA	adult male
I_00028c.JPG		PB063_Cam13_8-22Sep_2016	2016-09-09	20:52:07	Ok	FALSE	Mila	PB	Spring	F5	PB063	-33.1295	17.9904	31	13	2016-09-08	2016-09-22	animal	0	0	NA	NA	kudu	1	kudu	1	Natural	NA	NA	flat	game trail	0	NA	adult male
I_00028d.JPG		PB063_Cam13_8-22Sep_2016	2016-09-09	20:52:07	Ok	FALSE	Mila	PB	Spring	F5	PB063	-33.1295	17.9904	31	13	2016-09-08	2016-09-22	animal	0	0	NA	NA	kudu	1	kudu	1	Natural	NA	NA	flat	game trail	0	NA	adult male
I_00029a.JPG		PB063_Cam13_8-22Sep_2016	2016-09-09	20:52:50	Ok	FALSE	Mila	PB	Spring	F5	PB063	-33.1295	17.9904	31	13	2016-09-08	2016-09-22	animal	0	0	NA	NA	kudu	1	kudu	1	Natural	NA	NA	flat	game trail	0	NA	adult male
I_00029b.JPG		PB063_Cam13_8-22Sep_2016	2016-09-09	20:52:50	Ok	FALSE	Mila	PB	Spring	F5	PB063	-33.1295	17.9904	31	13	2016-09-08	2016-09-22	animal	0	0	NA	NA	kudu	1	kudu	1	Natural	NA	NA	flat	game trail	0	NA	adult male
I_00029c.JPG		PB063_Cam13_8-22Sep_2016	2016-09-09	20:52:50	Ok	FALSE	Mila	PB	Spring	F5	PB063	-33.1295	17.9904	31	13	2016-09-08	2016-09-22	animal	0	0	NA	NA	kudu	1	kudu	1	Natural	NA	NA	flat	game trail	0	NA	adult male
I_00029d.JPG		PB063_Cam13_8-22Sep_2016	2016-09-09	20:52:50	Ok	FALSE	Mila	PB	Spring	F5	PB063	-33.1295	17.9904	31	13	2016-09-08	2016-09-22	animal	0	0	NA	NA	kudu	1	kudu	1	Natural	NA	NA	flat	game trail	0	NA	adult male
I_00030a.JPG		PB063_Cam13_8-22Sep_2016	2016-09-09	20:53:30	Ok	FALSE	Mila	PB	Spring	F5	PB063	-33.1295	17.9904	31	13	2016-09-08	2016-09-22	animal	0	0	NA	NA	kudu	1	kudu	1	Natural	NA	NA	flat	game trail	0	NA	adult male
I_00030b.JPG		PB063_Cam13_8-22Sep_2016	2016-09-09	20:53:30	Ok	FALSE	Mila	PB	Spring	F5	PB063	-33.1295	17.9904	31	13	2016-09-08	2016-09-22	animal	0	0	NA	NA	kudu	1	kudu	1	Natural	NA	NA	flat	game trail	0	NA	adult male
I_00030c.JPG		PB063_Cam13_8-22Sep_2016	2016-09-09	20:53:30	Ok	FALSE	Mila	PB	Spring	F5	PB063	-33.1295	17.9904	31	13	2016-09-08	2016-09-22	animal	0	0	NA	NA	kudu	1	kudu	1	Natural	NA	NA	flat	game trail	0	NA	adult male
I_00030d.JPG		PB063_Cam13_8-22Sep_2016	2016-09-09	20:53:30	Ok	FALSE	Mila	PB	Spring	F5	PB063	-33.1295	17.9904	31	13	2016-09-08	2016-09-22	animal	0	0	NA	NA	kudu	1	kudu	1	Natural	NA	NA	flat	game trail	0	NA	adult male
I_00031a.JPG		PB063_Cam13_8-22Sep_2016	2016-09-09	20:54:31	Ok	FALSE	Mila	PB	Spring	F5	PB063	-33.1295	17.9904	31	13	2016-09-08	2016-09-22	animal	0	0	NA	NA	kudu	1	kudu	1	Natural	NA	NA	flat	game trail	0	NA	adult male
I_00031b.JPG		PB063_Cam13_8-22Sep_2016	2016-09-09	20:54:31	Ok	FALSE	Mila	PB	Spring	F5	PB063	-33.1295	17.9904	31	13	2016-09-08	2016-09-22	animal	0	0	NA	NA	kudu	1	kudu	1	Natural	NA	NA	flat	game trail	0	NA	adult male
I_00031c.JPG		PB063_Cam13_8-22Sep_2016	2016-09-09	20:54:31	Ok	FALSE	Mila	PB	Spring	F5	PB063	-33.1295	17.9904	31	13	2016-09-08	2016-09-22	animal	0	0	NA	NA	kudu	1	kudu	1	Natural	NA	NA	flat	game trail	0	NA	adult male
I_00031d.JPG		PB063_Cam13_8-22Sep_2016	2016-09-09	20:54:31	Ok	FALSE	Mila	PB	Spring	F5	PB063	-33.1295	17.9904	31	13	2016-09-08	2016-09-22	animal	0	0	NA	NA	kudu	1	kudu	1	Natural	NA	NA	flat	game trail	0	NA	adult male
I_00032a.JPG		PB063_Cam13_8-22Sep_2016	2016-09-09	20:55:09	Ok	FALSE	Mila	PB	Spring	F5	PB063	-33.1295	17.9904	31	13	2016-09-08	2016-09-22	animal	0	0	NA	NA	kudu	1	kudu	1	Natural	NA	NA	flat	game trail	0	NA	adult male
I_00032b.JPG		PB063_Cam13_8-22Sep_2016	2016-09-09	20:55:09	Ok	FALSE	Mila	PB	Spring	F5	PB063	-33.1295	17.9904	31	13	2016-09-08	2016-09-22	animal	0	0	NA	NA	kudu	1	kudu	1	Natural	NA	NA	flat	game trail	0	NA	adult male
I_00032c.JPG		PB063_Cam13_8-22Sep_2016	2016-09-09	20:55:09	Ok	FALSE	Mila	PB	Spring	F5	PB063	-33.1295	17.9904	31	13	2016-09-08	2016-09-22	animal	0	0	NA	NA	kudu	1	kudu	1	Natural	NA	NA	flat	game trail	0	NA	adult male
I_00032d.JPG		PB063_Cam13_8-22Sep_2016	2016-09-09	20:55:09	Ok	FALSE	Mila	PB	Spring	F5	PB063	-33.1295	17.9904	31	13	2016-09-08	2016-09-22	animal	0	0	NA	NA	kudu	1	kudu	1	Natural	NA	NA	flat	game trail	0	NA	adult male
I_00033a.JPG		PB063_Cam13_8-22Sep_2016	2016-09-09	20:55:46	Ok	FALSE	Mila	PB	Spring	F5	PB063	-33.1295	17.9904	31	13	2016-09-08	2016-09-22	animal	0	0	NA	NA	kudu	1	kudu	1	Natural	NA	NA	flat	game trail	0	NA	adult male
I_00033b.JPG		PB063_Cam13_8-22Sep_2016	2016-09-09	20:55:46	Ok	FALSE	Mila	PB	Spring	F5	PB063	-33.1295	17.9904	31	13	2016-09-08	2016-09-22	animal	0	0	NA	NA	kudu	1	kudu	1	Natural	NA	NA	flat	game trail	0	NA	adult male
I_00033c.JPG		PB063_Cam13_8-22Sep_2016	2016-09-09	20:55:46	Ok	FALSE	Mila	PB	Spring	F5	PB063	-33.1295	17.9904	31	13	2016-09-08	2016-09-22	animal	0	0	NA	NA	kudu	1	kudu	1	Natural	NA	NA	flat	game trail	0	NA	adult male
I_00033d.JPG		PB063_Cam13_8-22Sep_2016	2016-09-09	20:55:46	Ok	FALSE	Mila	PB	Spring	F5	PB063	-33.1295	17.9904	31	13	2016-09-08	2016-09-22	animal	0	0	NA	NA	kudu	1	kudu	1	Natural	NA	NA	flat	game trail	0	NA	adult male
I_00034a.JPG		PB063_Cam13_8-22Sep_2016	2016-09-09	20:56:18	Ok	FALSE	Mila	PB	Spring	F5	PB063	-33.1295	17.9904	31	13	2016-09-08	2016-09-22	animal	0	0	NA	NA	kudu	1	kudu	1	Natural	NA	NA	flat	game trail	0	NA	adult male
I_00034b.JPG		PB063_Cam13_8-22Sep_2016	2016-09-09	20:56:18	Ok	FALSE	Mila	PB	Spring	F5	PB063	-33.1295	17.9904	31	13	2016-09-08	2016-09-22	animal	0	0	NA	NA	kudu	1	kudu	1	Natural	NA	NA	flat	game trail	0	NA	adult male
I_00034c.JPG		PB063_Cam13_8-22Sep_2016	2016-09-09	20:56:18	Ok	FALSE	Mila	PB	Spring	F5	PB063	-33.1295	17.9904	31	13	2016-09-08	2016-09-22	animal	0	0	NA	NA	kudu	1	kudu	1	Natural	NA	NA	flat	game trail	0	NA	adult male
I_00034d.JPG		PB063_Cam13_8-22Sep_2016	2016-09-09	20:56:18	Ok	FALSE	Mila	PB	Spring	F5	PB063	-33.1295	17.9904	31	13	2016-09-08	2016-09-22	animal	0	0	NA	NA	kudu	1	kudu	1	Natural	NA	NA	flat	game trail	0	NA	adult male
I_00035a.JPG		PB063_Cam13_8-22Sep_2016	2016-09-09	20:56:50	Ok	FALSE	Mila	PB	Spring	F5	PB063	-33.1295	17.9904	31	13	2016-09-08	2016-09-22	animal	0	0	NA	NA	kudu	1	kudu	1	Natural	NA	NA	flat	game trail	0	NA	adult male
I_00035b.JPG		PB063_Cam13_8-22Sep_2016	2016-09-09	20:56:50	Ok	FALSE	Mila	PB	Spring	F5	PB063	-33.1295	17.9904	31	13	2016-09-08	2016-09-22	animal	0	0	NA	NA	kudu	1	kudu	1	Natural	NA	NA	flat	game trail	0	NA	adult male
I_00035c.JPG		PB063_Cam13_8-22Sep_2016	2016-09-09	20:56:50	Ok	FALSE	Mila	PB	Spring	F5	PB063	-33.1295	17.9904	31	13	2016-09-08	2016-09-22	animal	0	0	NA	NA	kudu	1	kudu	1	Natural	NA	NA	flat	game trail	0	NA	adult male
I_00035d.JPG		PB063_Cam13_8-22Sep_2016	2016-09-09	20:56:50	Ok	FALSE	Mila	PB	Spring	F5	PB063	-33.1295	17.9904	31	13	2016-09-08	2016-09-22	animal	0	0	NA	NA	kudu	1	kudu	1	Natural	NA	NA	flat	game trail	0	NA	adult male
I_00036a.JPG		PB063_Cam13_8-22Sep_2016	2016-09-09	20:57:21	Ok	FALSE	Mila	PB	Spring	F5	PB063	-33.1295	17.9904	31	13	2016-09-08	2016-09-22	animal	0	0	NA	NA	kudu	1	kudu	1	Natural	NA	NA	flat	game trail	0	NA	adult male
I_00036b.JPG		PB063_Cam13_8-22Sep_2016	2016-09-09	20:57:21	Ok	FALSE	Mila	PB	Spring	F5	PB063	-33.1295	17.9904	31	13	2016-09-08	2016-09-22	animal	0	0	NA	NA	kudu	1	kudu	1	Natural	NA	NA	flat	game trail	0	NA	adult male
I_00036c.JPG		PB063_Cam13_8-22Sep_2016	2016-09-09	20:57:21	Ok	FALSE	Mila	PB	Spring	F5	PB063	-33.1295	17.9904	31	13	2016-09-08	2016-09-22	animal	0	0	NA	NA	kudu	1	kudu	1	Natural	NA	NA	flat	game trail	0	NA	adult male
I_00036d.JPG		PB063_Cam13_8-22Sep_2016	2016-09-09	20:57:21	Ok	FALSE	Mila	PB	Spring	F5	PB063	-33.1295	17.9904	31	13	2016-09-08	2016-09-22	animal	0	0	NA	NA	kudu	1	kudu	1	Natural	NA	NA	flat	game trail	0	NA	adult male
I_00037a.JPG		PB063_Cam13_8-22Sep_2016	2016-09-09	20:57:52	Ok	FALSE	Mila	PB	Spring	F5	PB063	-33.1295	17.9904	31	13	2016-09-08	2016-09-22	animal	0	0	NA	NA	kudu	1	kudu	1	Natural	NA	NA	flat	game trail	0	NA	adult male
I_00037b.JPG		PB063_Cam13_8-22Sep_2016	2016-09-09	20:57:52	Ok	FALSE	Mila	PB	Spring	F5	PB063	-33.1295	17.9904	31	13	2016-09-08	2016-09-22	animal	0	0	NA	NA	kudu	1	kudu	1	Natural	NA	NA	flat	game trail	0	NA	adult male
I_00037c.JPG		PB063_Cam13_8-22Sep_2016	2016-09-09	20:57:52	Ok	FALSE	Mila	PB	Spring	F5	PB063	-33.1295	17.9904	31	13	2016-09-08	2016-09-22	animal	0	0	NA	NA	kudu	1	kudu	1	Natural	NA	NA	flat	game trail	0	NA	adult male
I_00037d.JPG		PB063_Cam13_8-22Sep_2016	2016-09-09	20:57:52	Ok	FALSE	Mila	PB	Spring	F5	PB063	-33.1295	17.9904	31	13	2016-09-08	2016-09-22	animal	0	0	NA	NA	kudu	1	kudu	1	Natural	NA	NA	flat	game trail	0	NA	adult male
I_00038a.JPG		PB063_Cam13_8-22Sep_2016	2016-09-09	20:58:23	Ok	FALSE	Mila	PB	Spring	F5	PB063	-33.1295	17.9904	31	13	2016-09-08	2016-09-22	animal	0	0	NA	NA	kudu	1	kudu	1	Natural	NA	NA	flat	game trail	0	NA	adult male
I_00038b.JPG		PB063_Cam13_8-22Sep_2016	2016-09-09	20:58:23	Ok	FALSE	Mila	PB	Spring	F5	PB063	-33.1295	17.9904	31	13	2016-09-08	2016-09-22	animal	0	0	NA	NA	kudu	1	kudu	1	Natural	NA	NA	flat	game trail	0	NA	adult male
I_00038c.JPG		PB063_Cam13_8-22Sep_2016	2016-09-09	20:58:23	Ok	FALSE	Mila	PB	Spring	F5	PB063	-33.1295	17.9904	31	13	2016-09-08	2016-09-22	animal	0	0	NA	NA	kudu	1	kudu	1	Natural	NA	NA	flat	game trail	0	NA	adult male
I_00038d.JPG		PB063_Cam13_8-22Sep_2016	2016-09-09	20:58:23	Ok	FALSE	Mila	PB	Spring	F5	PB063	-33.1295	17.9904	31	13	2016-09-08	2016-09-22	animal	0	0	NA	NA	kudu	1	kudu	1	Natural	NA	NA	flat	game trail	0	NA	adult male
I_00039a.JPG		PB063_Cam13_8-22Sep_2016	2016-09-09	20:59:20	Ok	FALSE	Mila	PB	Spring	F5	PB063	-33.1295	17.9904	31	13	2016-09-08	2016-09-22	animal	0	0	NA	NA	kudu	1	kudu	1	Natural	NA	NA	flat	game trail	0	NA	adult male
I_00039b.JPG		PB063_Cam13_8-22Sep_2016	2016-09-09	20:59:20	Ok	FALSE	Mila	PB	Spring	F5	PB063	-33.1295	17.9904	31	13	2016-09-08	2016-09-22	animal	0	0	NA	NA	kudu	1	kudu	1	Natural	NA	NA	flat	game trail	0	NA	adult male
I_00039c.JPG		PB063_Cam13_8-22Sep_2016	2016-09-09	20:59:20	Ok	FALSE	Mila	PB	Spring	F5	PB063	-33.1295	17.9904	31	13	2016-09-08	2016-09-22	animal	0	0	NA	NA	kudu	1	kudu	1	Natural	NA	NA	flat	game trail	0	NA	adult male
I_00039d.JPG		PB063_Cam13_8-22Sep_2016	2016-09-09	20:59:20	Ok	FALSE	Mila	PB	Spring	F5	PB063	-33.1295	17.9904	31	13	2016-09-08	2016-09-22	animal	0	0	NA	NA	kudu	1	kudu	1	Natural	NA	NA	flat	game trail	0	NA	adult male
I_00041a.JPG		PB063_Cam13_8-22Sep_2016	2016-09-09	21:00:56	Ok	FALSE	Mila	PB	Spring	F5	PB063	-33.1295	17.9904	31	13	2016-09-08	2016-09-22	animal	0	0	NA	NA	kudu	1	kudu	1	Natural	NA	Species unknown	flat	game trail	0	NA	NA
I_00066b.JPG		PB063_Cam13_8-22Sep_2016	2016-09-13	16:54:59	Ok	FALSE	Mila	PB	Spring	F5	PB063	-33.1295	17.9904	31	13	2016-09-08	2016-09-22	animal	0	0	NA	NA	kudu	1	kudu	1	Natural	NA	NA	flat	game trail	0	NA	adult female
I_00066c.JPG		PB063_Cam13_8-22Sep_2016	2016-09-13	16:54:59	Ok	FALSE	Mila	PB	Spring	F5	PB063	-33.1295	17.9904	31	13	2016-09-08	2016-09-22	animal	0	0	NA	NA	kudu	1	kudu	1	Natural	NA	NA	flat	game trail	0	NA	adult female
I_00067a.JPG		PB063_Cam13_8-22Sep_2016	2016-09-13	16:55:52	Ok	FALSE	Mila	PB	Spring	F5	PB063	-33.1295	17.9904	31	13	2016-09-08	2016-09-22	animal	0	0	NA	NA	kudu	1	kudu	1	Natural	NA	NA	flat	game trail	0	NA	adult female
I_00067b.JPG		PB063_Cam13_8-22Sep_2016	2016-09-13	16:55:52	Ok	FALSE	Mila	PB	Spring	F5	PB063	-33.1295	17.9904	31	13	2016-09-08	2016-09-22	animal	0	0	NA	NA	kudu	1	kudu	1	Natural	NA	NA	flat	game trail	0	NA	adult female
I_00067c.JPG		PB063_Cam13_8-22Sep_2016	2016-09-13	16:55:52	Ok	FALSE	Mila	PB	Spring	F5	PB063	-33.1295	17.9904	31	13	2016-09-08	2016-09-22	animal	0	0	NA	NA	kudu	1	kudu	1	Natural	NA	NA	flat	game trail	0	NA	adult female
I_00068a.JPG		PB063_Cam13_8-22Sep_2016	2016-09-13	16:56:39	Ok	FALSE	Mila	PB	Spring	F5	PB063	-33.1295	17.9904	31	13	2016-09-08	2016-09-22	animal	0	0	NA	NA	kudu	1	kudu	1	Natural	NA	NA	flat	game trail	0	NA	adult female
I_00069a.JPG		PB063_Cam13_8-22Sep_2016	2016-09-13	16:57:02	Ok	FALSE	Mila	PB	Spring	F5	PB063	-33.1295	17.9904	31	13	2016-09-08	2016-09-22	animal	0	0	NA	NA	kudu	1	kudu	1	Natural	NA	NA	flat	game trail	0	NA	adult female
I_00069b.JPG		PB063_Cam13_8-22Sep_2016	2016-09-13	16:57:02	Ok	FALSE	Mila	PB	Spring	F5	PB063	-33.1295	17.9904	31	13	2016-09-08	2016-09-22	animal	0	0	NA	NA	kudu	1	kudu	1	Natural	NA	NA	flat	game trail	0	NA	adult female
I_00069c.JPG		PB063_Cam13_8-22Sep_2016	2016-09-13	16:57:02	Ok	FALSE	Mila	PB	Spring	F5	PB063	-33.1295	17.9904	31	13	2016-09-08	2016-09-22	animal	0	0	NA	NA	kudu	2	kudu	2	Natural	NA	NA	flat	game trail	0	NA	adult female
I_00070b.JPG		PB063_Cam13_8-22Sep_2016	2016-09-13	17:16:30	Ok	FALSE	Mila	PB	Spring	F5	PB063	-33.1295	17.9904	31	13	2016-09-08	2016-09-22	animal	0	0	NA	NA	kudu	1	kudu	1	Natural	NA	NA	flat	game trail	0	NA	adult female
I_00070c.JPG		PB063_Cam13_8-22Sep_2016	2016-09-13	17:16:30	Ok	FALSE	Mila	PB	Spring	F5	PB063	-33.1295	17.9904	31	13	2016-09-08	2016-09-22	animal	0	0	NA	NA	kudu	1	kudu	1	Natural	NA	NA	flat	game trail	0	NA	adult female
I_00072a.JPG		PB063_Cam13_8-22Sep_2016	2016-09-13	17:17:19	Ok	FALSE	Mila	PB	Spring	F5	PB063	-33.1295	17.9904	31	13	2016-09-08	2016-09-22	animal	0	0	NA	NA	kudu	2	kudu	2	Natural	NA	NA	flat	game trail	0	NA	adult female
I_00072b.JPG		PB063_Cam13_8-22Sep_2016	2016-09-13	17:17:19	Ok	FALSE	Mila	PB	Spring	F5	PB063	-33.1295	17.9904	31	13	2016-09-08	2016-09-22	animal	0	0	NA	NA	kudu	3	kudu	3	Natural	NA	2 A F, 1 A M	flat	game trail	0	NA	NA
I_00072c.JPG		PB063_Cam13_8-22Sep_2016	2016-09-13	17:17:19	Ok	FALSE	Mila	PB	Spring	F5	PB063	-33.1295	17.9904	31	13	2016-09-08	2016-09-22	animal	0	0	NA	NA	kudu	3	kudu	3	Natural	NA	2 A F, 1 A M	flat	game trail	0	NA	adult female
I_00073b.JPG		PB063_Cam13_8-22Sep_2016	2016-09-13	17:17:44	Ok	FALSE	Mila	PB	Spring	F5	PB063	-33.1295	17.9904	31	13	2016-09-08	2016-09-22	animal	0	0	NA	NA	kudu	3	kudu	3	Natural	NA	2 A F, 1 A M	flat	game trail	0	NA	NA
I_00073c.JPG		PB063_Cam13_8-22Sep_2016	2016-09-13	17:17:44	Ok	FALSE	Mila	PB	Spring	F5	PB063	-33.1295	17.9904	31	13	2016-09-08	2016-09-22	animal	0	0	NA	NA	kudu	4	kudu	4	Natural	NA	2 A F, 1 A M	flat	game trail	0	NA	NA
I_00073a.JPG		PB063_Cam13_8-22Sep_2016	2016-09-13	17:17:44	Ok	FALSE	Mila	PB	Spring	F5	PB063	-33.1295	17.9904	31	13	2016-09-08	2016-09-22	animal	0	0	NA	NA	kudu	4	kudu	4	Natural	NA	3 A F, 1 A M	flat	game trail	0	NA	NA
I_00074c.JPG		PB063_Cam13_8-22Sep_2016	2016-09-13	17:18:54	Ok	FALSE	Mila	PB	Spring	F5	PB063	-33.1295	17.9904	31	13	2016-09-08	2016-09-22	animal	0	0	NA	NA	kudu	1	kudu	1	Natural	NA	NA	flat	game trail	0	NA	adult female
I_00074a.JPG		PB063_Cam13_8-22Sep_2016	2016-09-13	17:18:54	Ok	FALSE	Mila	PB	Spring	F5	PB063	-33.1295	17.9904	31	13	2016-09-08	2016-09-22	animal	0	0	NA	NA	kudu	2	kudu	2	Natural	NA	1 A F, 1 A U	flat	game trail	0	NA	NA
I_00074b.JPG		PB063_Cam13_8-22Sep_2016	2016-09-13	17:18:54	Ok	FALSE	Mila	PB	Spring	F5	PB063	-33.1295	17.9904	31	13	2016-09-08	2016-09-22	animal	0	0	NA	NA	kudu	3	kudu	3	Natural	NA	2 A F, 1 A U	flat	game trail	0	NA	NA
I_00057a.JPG		PB063_Cam13_8-22Sep_2016	2016-09-11	23:08:25	Ok	FALSE	Mila	PB	Spring	F5	PB063	-33.1295	17.9904	31	13	2016-09-08	2016-09-22	animal	0	0	NA	NA	large herbivore	1	large herbivore	1	Natural	NA	Species unknown	flat	game trail	0	NA	NA
I_00003a.JPG		PB063_Cam13_8-22Sep_2016	2016-09-09	06:54:02	Ok	FALSE	Mila	PB	Spring	F5	PB063	-33.1295	17.9904	31	13	2016-09-08	2016-09-22	animal	0	0	NA	NA	ostrich	1	ostrich	1	Natural	NA	NA	flat	game trail	0	NA	adult male
I_00003b.JPG		PB063_Cam13_8-22Sep_2016	2016-09-09	06:54:02	Ok	FALSE	Mila	PB	Spring	F5	PB063	-33.1295	17.9904	31	13	2016-09-08	2016-09-22	animal	0	0	NA	NA	ostrich	1	ostrich	1	Natural	NA	NA	flat	game trail	0	NA	adult male
I_00003c.JPG		PB063_Cam13_8-22Sep_2016	2016-09-09	06:54:02	Ok	FALSE	Mila	PB	Spring	F5	PB063	-33.1295	17.9904	31	13	2016-09-08	2016-09-22	animal	0	0	NA	NA	ostrich	1	ostrich	1	Natural	NA	NA	flat	game trail	0	NA	adult male
I_00004a.JPG		PB063_Cam13_8-22Sep_2016	2016-09-09	06:55:23	Ok	FALSE	Mila	PB	Spring	F5	PB063	-33.1295	17.9904	31	13	2016-09-08	2016-09-22	animal	0	0	NA	NA	ostrich	1	ostrich	1	Natural	NA	NA	flat	game trail	0	NA	adult male
I_00004b.JPG		PB063_Cam13_8-22Sep_2016	2016-09-09	06:55:23	Ok	FALSE	Mila	PB	Spring	F5	PB063	-33.1295	17.9904	31	13	2016-09-08	2016-09-22	animal	0	0	NA	NA	ostrich	1	ostrich	1	Natural	NA	NA	flat	game trail	0	NA	adult male
I_00004c.JPG		PB063_Cam13_8-22Sep_2016	2016-09-09	06:55:23	Ok	FALSE	Mila	PB	Spring	F5	PB063	-33.1295	17.9904	31	13	2016-09-08	2016-09-22	animal	0	0	NA	NA	ostrich	1	ostrich	1	Natural	NA	NA	flat	game trail	0	NA	adult male
I_00005a.JPG		PB063_Cam13_8-22Sep_2016	2016-09-09	06:55:45	Ok	FALSE	Mila	PB	Spring	F5	PB063	-33.1295	17.9904	31	13	2016-09-08	2016-09-22	animal	0	0	NA	NA	ostrich	1	ostrich	1	Natural	NA	NA	flat	game trail	0	NA	adult male
I_00005b.JPG		PB063_Cam13_8-22Sep_2016	2016-09-09	06:55:45	Ok	FALSE	Mila	PB	Spring	F5	PB063	-33.1295	17.9904	31	13	2016-09-08	2016-09-22	animal	0	0	NA	NA	ostrich	1	ostrich	1	Natural	NA	NA	flat	game trail	0	NA	adult male
I_00005c.JPG		PB063_Cam13_8-22Sep_2016	2016-09-09	06:55:45	Ok	FALSE	Mila	PB	Spring	F5	PB063	-33.1295	17.9904	31	13	2016-09-08	2016-09-22	animal	0	0	NA	NA	ostrich	1	ostrich	1	Natural	NA	NA	flat	game trail	0	NA	adult male
I_00006a.JPG		PB063_Cam13_8-22Sep_2016	2016-09-09	06:56:15	Ok	FALSE	Mila	PB	Spring	F5	PB063	-33.1295	17.9904	31	13	2016-09-08	2016-09-22	animal	0	0	NA	NA	ostrich	1	ostrich	1	Natural	NA	NA	flat	game trail	0	NA	adult male
I_00006b.JPG		PB063_Cam13_8-22Sep_2016	2016-09-09	06:56:15	Ok	FALSE	Mila	PB	Spring	F5	PB063	-33.1295	17.9904	31	13	2016-09-08	2016-09-22	animal	0	0	NA	NA	ostrich	1	ostrich	1	Natural	NA	NA	flat	game trail	0	NA	adult male
I_00006c.JPG		PB063_Cam13_8-22Sep_2016	2016-09-09	06:56:15	Ok	FALSE	Mila	PB	Spring	F5	PB063	-33.1295	17.9904	31	13	2016-09-08	2016-09-22	animal	0	0	NA	NA	ostrich	1	ostrich	1	Natural	NA	NA	flat	game trail	0	NA	adult male
I_00007a.JPG		PB063_Cam13_8-22Sep_2016	2016-09-09	06:57:40	Ok	FALSE	Mila	PB	Spring	F5	PB063	-33.1295	17.9904	31	13	2016-09-08	2016-09-22	animal	0	0	NA	NA	ostrich	1	ostrich	1	Natural	NA	NA	flat	game trail	0	NA	adult male
I_00007b.JPG		PB063_Cam13_8-22Sep_2016	2016-09-09	06:57:40	Ok	FALSE	Mila	PB	Spring	F5	PB063	-33.1295	17.9904	31	13	2016-09-08	2016-09-22	animal	0	0	NA	NA	ostrich	1	ostrich	1	Natural	NA	NA	flat	game trail	0	NA	adult male
I_00007c.JPG		PB063_Cam13_8-22Sep_2016	2016-09-09	06:57:40	Ok	FALSE	Mila	PB	Spring	F5	PB063	-33.1295	17.9904	31	13	2016-09-08	2016-09-22	animal	0	0	NA	NA	ostrich	1	ostrich	1	Natural	NA	NA	flat	game trail	0	NA	adult male
I_00008a.JPG		PB063_Cam13_8-22Sep_2016	2016-09-09	06:58:17	Ok	FALSE	Mila	PB	Spring	F5	PB063	-33.1295	17.9904	31	13	2016-09-08	2016-09-22	animal	0	0	NA	NA	ostrich	1	ostrich	1	Natural	NA	NA	flat	game trail	0	NA	adult male
I_00008b.JPG		PB063_Cam13_8-22Sep_2016	2016-09-09	06:58:17	Ok	FALSE	Mila	PB	Spring	F5	PB063	-33.1295	17.9904	31	13	2016-09-08	2016-09-22	animal	0	0	NA	NA	ostrich	1	ostrich	1	Natural	NA	NA	flat	game trail	0	NA	adult male
I_00008c.JPG		PB063_Cam13_8-22Sep_2016	2016-09-09	06:58:17	Ok	FALSE	Mila	PB	Spring	F5	PB063	-33.1295	17.9904	31	13	2016-09-08	2016-09-22	animal	0	0	NA	NA	ostrich	1	ostrich	1	Natural	NA	NA	flat	game trail	0	NA	adult male
I_00009a.JPG		PB063_Cam13_8-22Sep_2016	2016-09-09	06:58:40	Ok	FALSE	Mila	PB	Spring	F5	PB063	-33.1295	17.9904	31	13	2016-09-08	2016-09-22	animal	0	0	NA	NA	ostrich	1	ostrich	1	Natural	NA	NA	flat	game trail	0	NA	adult male
I_00009b.JPG		PB063_Cam13_8-22Sep_2016	2016-09-09	06:58:40	Ok	FALSE	Mila	PB	Spring	F5	PB063	-33.1295	17.9904	31	13	2016-09-08	2016-09-22	animal	0	0	NA	NA	ostrich	1	ostrich	1	Natural	NA	NA	flat	game trail	0	NA	adult male
I_00009c.JPG		PB063_Cam13_8-22Sep_2016	2016-09-09	06:58:40	Ok	FALSE	Mila	PB	Spring	F5	PB063	-33.1295	17.9904	31	13	2016-09-08	2016-09-22	animal	0	0	NA	NA	ostrich	1	ostrich	1	Natural	NA	NA	flat	game trail	0	NA	adult male
I_00010a.JPG		PB063_Cam13_8-22Sep_2016	2016-09-09	06:59:12	Ok	FALSE	Mila	PB	Spring	F5	PB063	-33.1295	17.9904	31	13	2016-09-08	2016-09-22	animal	0	0	NA	NA	ostrich	1	ostrich	1	Natural	NA	NA	flat	game trail	0	NA	adult male
I_00010b.JPG		PB063_Cam13_8-22Sep_2016	2016-09-09	06:59:12	Ok	FALSE	Mila	PB	Spring	F5	PB063	-33.1295	17.9904	31	13	2016-09-08	2016-09-22	animal	0	0	NA	NA	ostrich	1	ostrich	1	Natural	NA	NA	flat	game trail	0	NA	adult male
I_00010c.JPG		PB063_Cam13_8-22Sep_2016	2016-09-09	06:59:12	Ok	FALSE	Mila	PB	Spring	F5	PB063	-33.1295	17.9904	31	13	2016-09-08	2016-09-22	animal	0	0	NA	NA	ostrich	1	ostrich	1	Natural	NA	NA	flat	game trail	0	NA	adult male
I_00011a.JPG		PB063_Cam13_8-22Sep_2016	2016-09-09	06:59:39	Ok	FALSE	Mila	PB	Spring	F5	PB063	-33.1295	17.9904	31	13	2016-09-08	2016-09-22	animal	0	0	NA	NA	ostrich	1	ostrich	1	Natural	NA	NA	flat	game trail	0	NA	adult male
I_00012a.JPG		PB063_Cam13_8-22Sep_2016	2016-09-09	07:30:25	Ok	FALSE	Mila	PB	Spring	F5	PB063	-33.1295	17.9904	31	13	2016-09-08	2016-09-22	animal	0	0	NA	NA	ostrich	1	ostrich	1	Natural	NA	NA	flat	game trail	0	NA	adult male
I_00012b.JPG		PB063_Cam13_8-22Sep_2016	2016-09-09	07:30:25	Ok	FALSE	Mila	PB	Spring	F5	PB063	-33.1295	17.9904	31	13	2016-09-08	2016-09-22	animal	0	0	NA	NA	ostrich	1	ostrich	1	Natural	NA	NA	flat	game trail	0	NA	adult male
I_00012c.JPG		PB063_Cam13_8-22Sep_2016	2016-09-09	07:30:25	Ok	FALSE	Mila	PB	Spring	F5	PB063	-33.1295	17.9904	31	13	2016-09-08	2016-09-22	animal	0	0	NA	NA	ostrich	1	ostrich	1	Natural	NA	NA	flat	game trail	0	NA	adult male
I_00013a.JPG		PB063_Cam13_8-22Sep_2016	2016-09-09	08:10:44	Ok	FALSE	Mila	PB	Spring	F5	PB063	-33.1295	17.9904	31	13	2016-09-08	2016-09-22	animal	0	0	NA	NA	ostrich	1	ostrich	1	Natural	NA	NA	flat	game trail	0	NA	adult male
I_00013b.JPG		PB063_Cam13_8-22Sep_2016	2016-09-09	08:10:44	Ok	FALSE	Mila	PB	Spring	F5	PB063	-33.1295	17.9904	31	13	2016-09-08	2016-09-22	animal	0	0	NA	NA	ostrich	1	ostrich	1	Natural	NA	NA	flat	game trail	0	NA	adult male
I_00015a.JPG		PB063_Cam13_8-22Sep_2016	2016-09-09	08:26:07	Ok	FALSE	Mila	PB	Spring	F5	PB063	-33.1295	17.9904	31	13	2016-09-08	2016-09-22	animal	0	0	NA	NA	ostrich	1	ostrich	1	Natural	NA	NA	flat	game trail	0	NA	adult female
I_00015b.JPG		PB063_Cam13_8-22Sep_2016	2016-09-09	08:26:07	Ok	FALSE	Mila	PB	Spring	F5	PB063	-33.1295	17.9904	31	13	2016-09-08	2016-09-22	animal	0	0	NA	NA	ostrich	1	ostrich	1	Natural	NA	NA	flat	game trail	0	NA	adult female
I_00015c.JPG		PB063_Cam13_8-22Sep_2016	2016-09-09	08:26:07	Ok	FALSE	Mila	PB	Spring	F5	PB063	-33.1295	17.9904	31	13	2016-09-08	2016-09-22	animal	0	0	NA	NA	ostrich	1	ostrich	1	Natural	NA	NA	flat	game trail	0	NA	adult female
I_00016b.JPG		PB063_Cam13_8-22Sep_2016	2016-09-09	10:38:25	Ok	FALSE	Mila	PB	Spring	F5	PB063	-33.1295	17.9904	31	13	2016-09-08	2016-09-22	animal	0	0	NA	NA	ostrich	1	ostrich	1	Natural	NA	NA	flat	game trail	0	NA	adult male
I_00016c.JPG		PB063_Cam13_8-22Sep_2016	2016-09-09	10:38:25	Ok	FALSE	Mila	PB	Spring	F5	PB063	-33.1295	17.9904	31	13	2016-09-08	2016-09-22	animal	0	0	NA	NA	ostrich	1	ostrich	1	Natural	NA	NA	flat	game trail	0	NA	adult male
I_00043b.JPG		PB063_Cam13_8-22Sep_2016	2016-09-10	12:48:24	Ok	FALSE	Mila	PB	Spring	F5	PB063	-33.1295	17.9904	31	13	2016-09-08	2016-09-22	animal	0	0	NA	NA	ostrich	1	ostrich	1	Natural	NA	NA	flat	game trail	0	NA	adult female
I_00043c.JPG		PB063_Cam13_8-22Sep_2016	2016-09-10	12:48:24	Ok	FALSE	Mila	PB	Spring	F5	PB063	-33.1295	17.9904	31	13	2016-09-08	2016-09-22	animal	0	0	NA	NA	ostrich	1	ostrich	1	Natural	NA	NA	flat	game trail	0	NA	adult female
I_00044a.JPG		PB063_Cam13_8-22Sep_2016	2016-09-10	12:50:09	Ok	FALSE	Mila	PB	Spring	F5	PB063	-33.1295	17.9904	31	13	2016-09-08	2016-09-22	animal	0	0	NA	NA	ostrich	1	ostrich	1	Natural	NA	NA	flat	game trail	0	NA	adult female
I_00046b.JPG		PB063_Cam13_8-22Sep_2016	2016-09-11	08:37:57	Ok	FALSE	Mila	PB	Spring	F5	PB063	-33.1295	17.9904	31	13	2016-09-08	2016-09-22	animal	0	0	NA	NA	ostrich	1	ostrich	1	Natural	NA	NA	flat	game trail	0	NA	adult male
I_00046c.JPG		PB063_Cam13_8-22Sep_2016	2016-09-11	08:37:57	Ok	FALSE	Mila	PB	Spring	F5	PB063	-33.1295	17.9904	31	13	2016-09-08	2016-09-22	animal	0	0	NA	NA	ostrich	1	ostrich	1	Natural	NA	NA	flat	game trail	0	NA	adult male
I_00047a.JPG		PB063_Cam13_8-22Sep_2016	2016-09-11	08:38:26	Ok	FALSE	Mila	PB	Spring	F5	PB063	-33.1295	17.9904	31	13	2016-09-08	2016-09-22	animal	0	0	NA	NA	ostrich	1	ostrich	1	Natural	NA	NA	flat	game trail	0	NA	adult male
I_00047b.JPG		PB063_Cam13_8-22Sep_2016	2016-09-11	08:38:26	Ok	FALSE	Mila	PB	Spring	F5	PB063	-33.1295	17.9904	31	13	2016-09-08	2016-09-22	animal	0	0	NA	NA	ostrich	1	ostrich	1	Natural	NA	NA	flat	game trail	0	NA	adult male
I_00047c.JPG		PB063_Cam13_8-22Sep_2016	2016-09-11	08:38:26	Ok	FALSE	Mila	PB	Spring	F5	PB063	-33.1295	17.9904	31	13	2016-09-08	2016-09-22	animal	0	0	NA	NA	ostrich	1	ostrich	1	Natural	NA	NA	flat	game trail	0	NA	adult male
I_00048a.JPG		PB063_Cam13_8-22Sep_2016	2016-09-11	08:39:25	Ok	FALSE	Mila	PB	Spring	F5	PB063	-33.1295	17.9904	31	13	2016-09-08	2016-09-22	animal	0	0	NA	NA	ostrich	1	ostrich	1	Natural	NA	NA	flat	game trail	0	NA	adult male
I_00048b.JPG		PB063_Cam13_8-22Sep_2016	2016-09-11	08:39:25	Ok	FALSE	Mila	PB	Spring	F5	PB063	-33.1295	17.9904	31	13	2016-09-08	2016-09-22	animal	0	0	NA	NA	ostrich	1	ostrich	1	Natural	NA	NA	flat	game trail	0	NA	adult male
I_00048c.JPG		PB063_Cam13_8-22Sep_2016	2016-09-11	08:39:25	Ok	FALSE	Mila	PB	Spring	F5	PB063	-33.1295	17.9904	31	13	2016-09-08	2016-09-22	animal	0	0	NA	NA	ostrich	1	ostrich	1	Natural	NA	NA	flat	game trail	0	NA	adult male
I_00049a.JPG		PB063_Cam13_8-22Sep_2016	2016-09-11	11:14:25	Ok	FALSE	Mila	PB	Spring	F5	PB063	-33.1295	17.9904	31	13	2016-09-08	2016-09-22	animal	0	0	NA	NA	ostrich	1	ostrich	1	Natural	NA	NA	flat	game trail	0	NA	adult female
I_00049b.JPG		PB063_Cam13_8-22Sep_2016	2016-09-11	11:14:25	Ok	FALSE	Mila	PB	Spring	F5	PB063	-33.1295	17.9904	31	13	2016-09-08	2016-09-22	animal	0	0	NA	NA	ostrich	1	ostrich	1	Natural	NA	NA	flat	game trail	0	NA	adult female
I_00049c.JPG		PB063_Cam13_8-22Sep_2016	2016-09-11	11:14:25	Ok	FALSE	Mila	PB	Spring	F5	PB063	-33.1295	17.9904	31	13	2016-09-08	2016-09-22	animal	0	0	NA	NA	ostrich	1	ostrich	1	Natural	NA	NA	flat	game trail	0	NA	adult female
I_00050a.JPG		PB063_Cam13_8-22Sep_2016	2016-09-11	11:14:48	Ok	FALSE	Mila	PB	Spring	F5	PB063	-33.1295	17.9904	31	13	2016-09-08	2016-09-22	animal	0	0	NA	NA	ostrich	1	ostrich	1	Natural	NA	NA	flat	game trail	0	NA	adult female
I_00050b.JPG		PB063_Cam13_8-22Sep_2016	2016-09-11	11:14:48	Ok	FALSE	Mila	PB	Spring	F5	PB063	-33.1295	17.9904	31	13	2016-09-08	2016-09-22	animal	0	0	NA	NA	ostrich	1	ostrich	1	Natural	NA	NA	flat	game trail	0	NA	adult female
I_00050c.JPG		PB063_Cam13_8-22Sep_2016	2016-09-11	11:14:48	Ok	FALSE	Mila	PB	Spring	F5	PB063	-33.1295	17.9904	31	13	2016-09-08	2016-09-22	animal	0	0	NA	NA	ostrich	1	ostrich	1	Natural	NA	NA	flat	game trail	0	NA	adult female
I_00051a.JPG		PB063_Cam13_8-22Sep_2016	2016-09-11	11:15:35	Ok	FALSE	Mila	PB	Spring	F5	PB063	-33.1295	17.9904	31	13	2016-09-08	2016-09-22	animal	0	0	NA	NA	ostrich	1	ostrich	1	Natural	NA	NA	flat	game trail	0	NA	adult female
I_00054a.JPG		PB063_Cam13_8-22Sep_2016	2016-09-11	16:42:27	Ok	FALSE	Mila	PB	Spring	F5	PB063	-33.1295	17.9904	31	13	2016-09-08	2016-09-22	animal	0	0	NA	NA	ostrich	1	ostrich	1	Natural	NA	NA	flat	game trail	0	NA	adult female
I_00055a.JPG		PB063_Cam13_8-22Sep_2016	2016-09-11	18:45:32	Ok	FALSE	Mila	PB	Spring	F5	PB063	-33.1295	17.9904	31	13	2016-09-08	2016-09-22	animal	0	0	NA	NA	ostrich	1	ostrich	1	Natural	NA	NA	flat	game trail	0	NA	adult female
I_00055b.JPG		PB063_Cam13_8-22Sep_2016	2016-09-11	18:45:32	Ok	FALSE	Mila	PB	Spring	F5	PB063	-33.1295	17.9904	31	13	2016-09-08	2016-09-22	animal	0	0	NA	NA	ostrich	1	ostrich	1	Natural	NA	NA	flat	game trail	0	NA	adult female
I_00055c.JPG		PB063_Cam13_8-22Sep_2016	2016-09-11	18:45:32	Ok	FALSE	Mila	PB	Spring	F5	PB063	-33.1295	17.9904	31	13	2016-09-08	2016-09-22	animal	0	0	NA	NA	ostrich	2	ostrich	2	Natural	NA	NA	flat	game trail	0	NA	adult female
I_00059b.JPG		PB063_Cam13_8-22Sep_2016	2016-09-12	11:15:54	Ok	FALSE	Mila	PB	Spring	F5	PB063	-33.1295	17.9904	31	13	2016-09-08	2016-09-22	animal	0	0	NA	NA	ostrich	1	ostrich	1	Natural	NA	NA	flat	game trail	0	NA	adult female
I_00059c.JPG		PB063_Cam13_8-22Sep_2016	2016-09-12	11:15:54	Ok	FALSE	Mila	PB	Spring	F5	PB063	-33.1295	17.9904	31	13	2016-09-08	2016-09-22	animal	0	0	NA	NA	ostrich	1	ostrich	1	Natural	NA	NA	flat	game trail	0	NA	adult female
I_00060a.JPG		PB063_Cam13_8-22Sep_2016	2016-09-12	11:23:05	Ok	FALSE	Mila	PB	Spring	F5	PB063	-33.1295	17.9904	31	13	2016-09-08	2016-09-22	animal	0	0	NA	NA	ostrich	1	ostrich	1	Natural	NA	NA	flat	game trail	0	NA	adult male
I_00060b.JPG		PB063_Cam13_8-22Sep_2016	2016-09-12	11:23:05	Ok	FALSE	Mila	PB	Spring	F5	PB063	-33.1295	17.9904	31	13	2016-09-08	2016-09-22	animal	0	0	NA	NA	ostrich	1	ostrich	1	Natural	NA	NA	flat	game trail	0	NA	adult male
I_00060c.JPG		PB063_Cam13_8-22Sep_2016	2016-09-12	11:23:05	Ok	FALSE	Mila	PB	Spring	F5	PB063	-33.1295	17.9904	31	13	2016-09-08	2016-09-22	animal	0	0	NA	NA	ostrich	1	ostrich	1	Natural	NA	NA	flat	game trail	0	NA	adult male
I_00077a.JPG		PB063_Cam13_8-22Sep_2016	2016-09-14	18:36:48	Ok	FALSE	Mila	PB	Spring	F5	PB063	-33.1295	17.9904	31	13	2016-09-08	2016-09-22	animal	0	0	NA	NA	ostrich	1	ostrich	1	Natural	NA	NA	flat	game trail	0	NA	adult male
I_00077b.JPG		PB063_Cam13_8-22Sep_2016	2016-09-14	18:36:48	Ok	FALSE	Mila	PB	Spring	F5	PB063	-33.1295	17.9904	31	13	2016-09-08	2016-09-22	animal	0	0	NA	NA	ostrich	1	ostrich	1	Natural	NA	NA	flat	game trail	0	NA	adult male
I_00078a.JPG		PB063_Cam13_8-22Sep_2016	2016-09-14	18:44:32	Ok	FALSE	Mila	PB	Spring	F5	PB063	-33.1295	17.9904	31	13	2016-09-08	2016-09-22	animal	0	0	NA	NA	ostrich	1	ostrich	1	Natural	NA	NA	flat	game trail	0	NA	adult male
I_00078b.JPG		PB063_Cam13_8-22Sep_2016	2016-09-14	18:44:32	Ok	FALSE	Mila	PB	Spring	F5	PB063	-33.1295	17.9904	31	13	2016-09-08	2016-09-22	animal	0	0	NA	NA	ostrich	1	ostrich	1	Natural	NA	NA	flat	game trail	0	NA	adult male
I_00082a.JPG		PB063_Cam13_8-22Sep_2016	2016-09-15	18:45:10	Ok	FALSE	Mila	PB	Spring	F5	PB063	-33.1295	17.9904	31	13	2016-09-08	2016-09-22	animal	0	0	NA	NA	ostrich	1	ostrich	1	Natural	NA	NA	flat	game trail	0	NA	adult female
I_00083a.JPG		PB063_Cam13_8-22Sep_2016	2016-09-15	18:46:04	Ok	FALSE	Mila	PB	Spring	F5	PB063	-33.1295	17.9904	31	13	2016-09-08	2016-09-22	animal	0	0	NA	NA	ostrich	1	ostrich	1	Natural	NA	NA	flat	game trail	0	NA	adult female
I_00083b.JPG		PB063_Cam13_8-22Sep_2016	2016-09-15	18:46:04	Ok	FALSE	Mila	PB	Spring	F5	PB063	-33.1295	17.9904	31	13	2016-09-08	2016-09-22	animal	0	0	NA	NA	ostrich	1	ostrich	1	Natural	NA	NA	flat	game trail	0	NA	adult female
I_00083c.JPG		PB063_Cam13_8-22Sep_2016	2016-09-15	18:46:04	Ok	FALSE	Mila	PB	Spring	F5	PB063	-33.1295	17.9904	31	13	2016-09-08	2016-09-22	animal	0	0	NA	NA	ostrich	1	ostrich	1	Natural	NA	NA	flat	game trail	0	NA	adult female
I_00084a.JPG		PB063_Cam13_8-22Sep_2016	2016-09-15	18:46:29	Ok	FALSE	Mila	PB	Spring	F5	PB063	-33.1295	17.9904	31	13	2016-09-08	2016-09-22	animal	0	0	NA	NA	ostrich	1	ostrich	1	Natural	NA	NA	flat	game trail	0	NA	adult female
I_00084c.JPG		PB063_Cam13_8-22Sep_2016	2016-09-15	18:46:29	Ok	FALSE	Mila	PB	Spring	F5	PB063	-33.1295	17.9904	31	13	2016-09-08	2016-09-22	animal	0	0	NA	NA	ostrich	1	ostrich	1	Natural	NA	NA	flat	game trail	0	NA	adult female
I_00084b.JPG		PB063_Cam13_8-22Sep_2016	2016-09-15	18:46:29	Ok	FALSE	Mila	PB	Spring	F5	PB063	-33.1295	17.9904	31	13	2016-09-08	2016-09-22	animal	0	0	NA	NA	ostrich	2	ostrich	2	Natural	NA	NA	flat	game trail	0	NA	adult female
I_00096a.JPG		PB063_Cam13_8-22Sep_2016	2016-09-18	17:23:02	Ok	FALSE	Mila	PB	Spring	F5	PB063	-33.1295	17.9904	31	13	2016-09-08	2016-09-22	animal	0	0	NA	NA	ostrich	1	ostrich	1	Natural	NA	NA	flat	game trail	0	NA	adult female
I_00096b.JPG		PB063_Cam13_8-22Sep_2016	2016-09-18	17:23:02	Ok	FALSE	Mila	PB	Spring	F5	PB063	-33.1295	17.9904	31	13	2016-09-08	2016-09-22	animal	0	0	NA	NA	ostrich	1	ostrich	1	Natural	NA	NA	flat	game trail	0	NA	adult female
I_00096c.JPG		PB063_Cam13_8-22Sep_2016	2016-09-18	17:23:02	Ok	FALSE	Mila	PB	Spring	F5	PB063	-33.1295	17.9904	31	13	2016-09-08	2016-09-22	animal	0	0	NA	NA	ostrich	1	ostrich	1	Natural	NA	NA	flat	game trail	0	NA	adult female
I_00097a.JPG		PB063_Cam13_8-22Sep_2016	2016-09-18	17:23:48	Ok	FALSE	Mila	PB	Spring	F5	PB063	-33.1295	17.9904	31	13	2016-09-08	2016-09-22	animal	0	0	NA	NA	ostrich	1	ostrich	1	Natural	NA	NA	flat	game trail	0	NA	adult female
I_00098a.JPG		PB063_Cam13_8-22Sep_2016	2016-09-19	07:40:33	Ok	FALSE	Mila	PB	Spring	F5	PB063	-33.1295	17.9904	31	13	2016-09-08	2016-09-22	animal	0	0	NA	NA	ostrich	1	ostrich	1	Natural	NA	NA	flat	game trail	0	NA	adult female
I_00098b.JPG		PB063_Cam13_8-22Sep_2016	2016-09-19	07:40:33	Ok	FALSE	Mila	PB	Spring	F5	PB063	-33.1295	17.9904	31	13	2016-09-08	2016-09-22	animal	0	0	NA	NA	ostrich	1	ostrich	1	Natural	NA	NA	flat	game trail	0	NA	adult female
I_00098c.JPG		PB063_Cam13_8-22Sep_2016	2016-09-19	07:40:33	Ok	FALSE	Mila	PB	Spring	F5	PB063	-33.1295	17.9904	31	13	2016-09-08	2016-09-22	animal	0	0	NA	NA	ostrich	1	ostrich	1	Natural	NA	NA	flat	game trail	0	NA	adult female
I_00099a.JPG		PB063_Cam13_8-22Sep_2016	2016-09-19	07:42:28	Ok	FALSE	Mila	PB	Spring	F5	PB063	-33.1295	17.9904	31	13	2016-09-08	2016-09-22	animal	0	0	NA	NA	ostrich	1	ostrich	1	Natural	NA	NA	flat	game trail	0	NA	adult female
I_00099b.JPG		PB063_Cam13_8-22Sep_2016	2016-09-19	07:42:28	Ok	FALSE	Mila	PB	Spring	F5	PB063	-33.1295	17.9904	31	13	2016-09-08	2016-09-22	animal	0	0	NA	NA	ostrich	1	ostrich	1	Natural	NA	NA	flat	game trail	0	NA	adult female
I_00103a.JPG		PB063_Cam13_8-22Sep_2016	2016-09-20	17:09:17	Ok	FALSE	Mila	PB	Spring	F5	PB063	-33.1295	17.9904	31	13	2016-09-08	2016-09-22	animal	0	0	NA	NA	ostrich	1	ostrich	1	Natural	NA	NA	flat	game trail	0	NA	adult male
I_00103b.JPG		PB063_Cam13_8-22Sep_2016	2016-09-20	17:09:17	Ok	FALSE	Mila	PB	Spring	F5	PB063	-33.1295	17.9904	31	13	2016-09-08	2016-09-22	animal	0	0	NA	NA	ostrich	1	ostrich	1	Natural	NA	NA	flat	game trail	0	NA	adult male
I_00103c.JPG		PB063_Cam13_8-22Sep_2016	2016-09-20	17:09:17	Ok	FALSE	Mila	PB	Spring	F5	PB063	-33.1295	17.9904	31	13	2016-09-08	2016-09-22	animal	0	0	NA	NA	ostrich	1	ostrich	1	Natural	NA	NA	flat	game trail	0	NA	adult male
I_00104a.JPG		PB063_Cam13_8-22Sep_2016	2016-09-20	17:49:41	Ok	FALSE	Mila	PB	Spring	F5	PB063	-33.1295	17.9904	31	13	2016-09-08	2016-09-22	animal	0	0	NA	NA	ostrich	1	ostrich	1	Natural	NA	NA	flat	game trail	0	NA	adult male
I_00104b.JPG		PB063_Cam13_8-22Sep_2016	2016-09-20	17:49:41	Ok	FALSE	Mila	PB	Spring	F5	PB063	-33.1295	17.9904	31	13	2016-09-08	2016-09-22	animal	0	0	NA	NA	ostrich	1	ostrich	1	Natural	NA	NA	flat	game trail	0	NA	adult male
I_00052a.JPG		PB063_Cam13_8-22Sep_2016	2016-09-11	15:58:58	Ok	FALSE	Mila	PB	Spring	F5	PB063	-33.1295	17.9904	31	13	2016-09-08	2016-09-22	animal	0	0	NA	NA	springbok	1	springbok	1	Natural	NA	1 A U	flat	game trail	0	NA	NA
I_00045b.JPG		PB063_Cam13_8-22Sep_2016	2016-09-10	22:04:41	Ok	FALSE	Mila	PB	Spring	F5	PB063	-33.1295	17.9904	31	13	2016-09-08	2016-09-22	animal	0	0	NA	NA	unknown species	1	unknown species	1	Natural	NA	Species unknown	flat	game trail	0	NA	NA
I_00045c.JPG		PB063_Cam13_8-22Sep_2016	2016-09-10	22:04:41	Ok	FALSE	Mila	PB	Spring	F5	PB063	-33.1295	17.9904	31	13	2016-09-08	2016-09-22	animal	0	0	NA	NA	unknown species	1	unknown species	1	Natural	NA	Species unknown	flat	game trail	0	NA	NA
I_00045d.JPG		PB063_Cam13_8-22Sep_2016	2016-09-10	22:04:41	Ok	FALSE	Mila	PB	Spring	F5	PB063	-33.1295	17.9904	31	13	2016-09-08	2016-09-22	animal	0	0	NA	NA	unknown species	1	unknown species	1	Natural	NA	Species unknown	flat	game trail	0	NA	NA
I_00045a.JPG		PB063_Cam13_8-22Sep_2016	2016-09-10	22:04:41	Ok	FALSE	Mila	PB	Spring	F5	PB063	-33.1295	17.9904	31	13	2016-09-08	2016-09-22	animal	0	0	NA	NA	unknown species	1	unknown species	1	Natural	NA	Species unknown	flat	game trail	0	NA	NA
I_00006a.JPG		PB064_Cam13_22Sep-6Oct_2016	2016-09-28	17:20:51	Ok	FALSE	Mila	PB	Spring	F6	PB064	-33.1325	17.9985	48	13	2016-09-22	2016-10-06	animal	0	0	NA	NA	cape mountain zebra	1	cape mountain zebra	1	Natural	NA	1 A U	flat	old road	2	NA	NA
I_00006c.JPG		PB064_Cam13_22Sep-6Oct_2016	2016-09-28	17:20:51	Ok	FALSE	Mila	PB	Spring	F6	PB064	-33.1325	17.9985	48	13	2016-09-22	2016-10-06	animal	0	0	NA	NA	cape mountain zebra	1	cape mountain zebra	1	Natural	NA	1 A U	flat	old road	2	NA	NA
I_00003a.JPG		PB064_Cam13_22Sep-6Oct_2016	2016-09-24	08:37:08	Ok	FALSE	Mila	PB	Spring	F6	PB064	-33.1325	17.9985	48	13	2016-09-22	2016-10-06	animal	0	0	NA	NA	cape spurfowl	1	cape spurfowl	1	Natural	NA	Unknown sex amd age	flat	old road	2	NA	NA
I_00003b.JPG		PB064_Cam13_22Sep-6Oct_2016	2016-09-24	08:37:08	Ok	FALSE	Mila	PB	Spring	F6	PB064	-33.1325	17.9985	48	13	2016-09-22	2016-10-06	animal	0	0	NA	NA	cape spurfowl	1	cape spurfowl	1	Natural	NA	Unknown sex and age	flat	old road	2	NA	NA
I_00001b.JPG		PB064_Cam13_22Sep-6Oct_2016	2016-09-23	06:44:28	Ok	FALSE	Mila	PB	Spring	F6	PB064	-33.1325	17.9985	48	13	2016-09-22	2016-10-06	animal	0	0	NA	NA	eland	1	eland	1	Natural	NA	Species unknown	flat	old road	2	NA	NA
I_00001c.JPG		PB064_Cam13_22Sep-6Oct_2016	2016-09-23	06:44:28	Ok	FALSE	Mila	PB	Spring	F6	PB064	-33.1325	17.9985	48	13	2016-09-22	2016-10-06	animal	0	0	NA	NA	eland	1	eland	1	Natural	NA	Species unknown	flat	old road	2	NA	NA
I_00001a.JPG		PB064_Cam13_22Sep-6Oct_2016	2016-09-23	06:44:28	Ok	FALSE	Mila	PB	Spring	F6	PB064	-33.1325	17.9985	48	13	2016-09-22	2016-10-06	animal	0	0	NA	NA	eland	1	eland	1	Natural	NA	Species unknown	flat	old road	2	NA	NA
I_00005a.JPG		PB064_Cam13_22Sep-6Oct_2016	2016-09-27	23:08:42	Ok	FALSE	Mila	PB	Spring	F6	PB064	-33.1325	17.9985	48	13	2016-09-22	2016-10-06	animal	0	0	NA	NA	eland	1	eland	1	Natural	NA	Unknown species	flat	old road	2	NA	NA
I_00005b.JPG		PB064_Cam13_22Sep-6Oct_2016	2016-09-27	23:08:42	Ok	FALSE	Mila	PB	Spring	F6	PB064	-33.1325	17.9985	48	13	2016-09-22	2016-10-06	animal	0	0	NA	NA	eland	1	eland	1	Natural	NA	Unknown species	flat	old road	2	NA	NA
I_00005c.JPG		PB064_Cam13_22Sep-6Oct_2016	2016-09-27	23:08:42	Ok	FALSE	Mila	PB	Spring	F6	PB064	-33.1325	17.9985	48	13	2016-09-22	2016-10-06	animal	0	0	NA	NA	eland	1	eland	1	Natural	NA	Unknown species	flat	old road	2	NA	NA
I_00004a.JPG		PB064_Cam13_22Sep-6Oct_2016	2016-09-27	07:03:11	Ok	FALSE	Mila	PB	Spring	F6	PB064	-33.1325	17.9985	48	13	2016-09-22	2016-10-06	animal	0	0	NA	NA	ostrich	1	ostrich	1	Natural	NA	1 A U	flat	old road	2	NA	NA
I_00066a.JPG		PB065_Cam2_9-23Sep_2016	2016-09-13	19:03:37	Ok	FALSE	Mila	PB	Spring	F6	PB065	-33.1359	18.0039	34	2	2016-09-09	2016-09-23	animal	0	0	NA	NA	blue wildebeest	1	blue wildebeest	1	Natural	NA	1 A U	flat	old road	2	NA	NA
I_00104a.JPG		PB065_Cam2_9-23Sep_2016	2016-09-16	05:41:30	Ok	FALSE	Mila	PB	Spring	F6	PB065	-33.1359	18.0039	34	2	2016-09-09	2016-09-23	animal	0	0	NA	NA	blue wildebeest	1	blue wildebeest	1	Natural	NA	1 A U	flat	old road	2	NA	NA
I_00104b.JPG		PB065_Cam2_9-23Sep_2016	2016-09-16	05:41:30	Ok	FALSE	Mila	PB	Spring	F6	PB065	-33.1359	18.0039	34	2	2016-09-09	2016-09-23	animal	0	0	NA	NA	blue wildebeest	1	blue wildebeest	1	Natural	NA	1 A U	flat	old road	2	NA	NA
I_00172a.JPG		PB065_Cam2_9-23Sep_2016	2016-09-22	02:25:31	Ok	FALSE	Mila	PB	Spring	F6	PB065	-33.1359	18.0039	34	2	2016-09-09	2016-09-23	animal	0	0	NA	NA	blue wildebeest	1	blue wildebeest	1	Natural	NA	Unknown age and sex	flat	old road	2	NA	NA
I_00033a.JPG		PB065_Cam2_9-23Sep_2016	2016-09-11	10:11:53	Ok	FALSE	Mila	PB	Spring	F6	PB065	-33.1359	18.0039	34	2	2016-09-09	2016-09-23	animal	0	0	NA	NA	bontebok	1	bontebok	1	Natural	NA	Unknown sex and age	flat	old road	2	NA	NA
I_00033b.JPG		PB065_Cam2_9-23Sep_2016	2016-09-11	10:11:53	Ok	FALSE	Mila	PB	Spring	F6	PB065	-33.1359	18.0039	34	2	2016-09-09	2016-09-23	animal	0	0	NA	NA	bontebok	1	bontebok	1	Natural	NA	Unknown sex and age	flat	old road	2	NA	NA
I_00062a.JPG		PB065_Cam2_9-23Sep_2016	2016-09-13	13:57:26	Ok	FALSE	Mila	PB	Spring	F6	PB065	-33.1359	18.0039	34	2	2016-09-09	2016-09-23	animal	0	0	NA	NA	bontebok	1	bontebok	1	Natural	NA	1 A U	flat	old road	2	NA	NA
I_00062b.JPG		PB065_Cam2_9-23Sep_2016	2016-09-13	13:57:26	Ok	FALSE	Mila	PB	Spring	F6	PB065	-33.1359	18.0039	34	2	2016-09-09	2016-09-23	animal	0	0	NA	NA	bontebok	1	bontebok	1	Natural	NA	1 A U	flat	old road	2	NA	NA
I_00095a.JPG		PB065_Cam2_9-23Sep_2016	2016-09-14	17:29:11	Ok	FALSE	Mila	PB	Spring	F6	PB065	-33.1359	18.0039	34	2	2016-09-09	2016-09-23	animal	0	0	NA	NA	bontebok	1	bontebok	1	Natural	NA	1 A U	flat	old road	2	NA	NA
I_00130a.JPG		PB065_Cam2_9-23Sep_2016	2016-09-18	13:30:36	Ok	FALSE	Mila	PB	Spring	F6	PB065	-33.1359	18.0039	34	2	2016-09-09	2016-09-23	animal	0	0	NA	NA	bontebok	1	bontebok	1	Natural	NA	1 A U	flat	old road	2	NA	NA
I_00130b.JPG		PB065_Cam2_9-23Sep_2016	2016-09-18	13:30:36	Ok	FALSE	Mila	PB	Spring	F6	PB065	-33.1359	18.0039	34	2	2016-09-09	2016-09-23	animal	0	0	NA	NA	bontebok	1	bontebok	1	Natural	NA	1 A U	flat	old road	2	NA	NA
I_00106b.JPG		PB065_Cam2_9-23Sep_2016	2016-09-16	10:25:04	Ok	FALSE	Mila	PB	Spring	F6	PB065	-33.1359	18.0039	34	2	2016-09-09	2016-09-23	animal	0	0	NA	NA	cape mountain zebra	1	cape mountain zebra	1	Natural	NA	1 J U	flat	old road	2	NA	NA
I_00106c.JPG		PB065_Cam2_9-23Sep_2016	2016-09-16	10:25:04	Ok	FALSE	Mila	PB	Spring	F6	PB065	-33.1359	18.0039	34	2	2016-09-09	2016-09-23	animal	0	0	NA	NA	cape mountain zebra	1	cape mountain zebra	1	Natural	NA	1 J U	flat	old road	2	NA	NA
I_00106a.JPG		PB065_Cam2_9-23Sep_2016	2016-09-16	10:25:04	Ok	FALSE	Mila	PB	Spring	F6	PB065	-33.1359	18.0039	34	2	2016-09-09	2016-09-23	animal	0	0	NA	NA	cape mountain zebra	2	cape mountain zebra	2	Natural	NA	1 A U, 1 J U	flat	old road	2	NA	NA
I_00107a.JPG		PB065_Cam2_9-23Sep_2016	2016-09-16	10:26:02	Ok	FALSE	Mila	PB	Spring	F6	PB065	-33.1359	18.0039	34	2	2016-09-09	2016-09-23	animal	0	0	NA	NA	cape mountain zebra	1	cape mountain zebra	1	Natural	NA	1 J U	flat	old road	2	NA	NA
I_00107b.JPG		PB065_Cam2_9-23Sep_2016	2016-09-16	10:26:02	Ok	FALSE	Mila	PB	Spring	F6	PB065	-33.1359	18.0039	34	2	2016-09-09	2016-09-23	animal	0	0	NA	NA	cape mountain zebra	1	cape mountain zebra	1	Natural	NA	1 J U	flat	old road	2	NA	NA
I_00107c.JPG		PB065_Cam2_9-23Sep_2016	2016-09-16	10:26:02	Ok	FALSE	Mila	PB	Spring	F6	PB065	-33.1359	18.0039	34	2	2016-09-09	2016-09-23	animal	0	0	NA	NA	cape mountain zebra	1	cape mountain zebra	1	Natural	NA	1 J U	flat	old road	2	NA	NA
I_00109a.JPG		PB065_Cam2_9-23Sep_2016	2016-09-16	10:37:39	Ok	FALSE	Mila	PB	Spring	F6	PB065	-33.1359	18.0039	34	2	2016-09-09	2016-09-23	animal	0	0	NA	NA	cape mountain zebra	1	cape mountain zebra	1	Natural	NA	1 J U	flat	old road	2	NA	NA
I_00109c.JPG		PB065_Cam2_9-23Sep_2016	2016-09-16	10:37:39	Ok	FALSE	Mila	PB	Spring	F6	PB065	-33.1359	18.0039	34	2	2016-09-09	2016-09-23	animal	0	0	NA	NA	cape mountain zebra	1	cape mountain zebra	1	Natural	NA	1 A U	flat	old road	2	NA	NA
I_00109b.JPG		PB065_Cam2_9-23Sep_2016	2016-09-16	10:37:39	Ok	FALSE	Mila	PB	Spring	F6	PB065	-33.1359	18.0039	34	2	2016-09-09	2016-09-23	animal	0	0	NA	NA	cape mountain zebra	2	cape mountain zebra	2	Natural	NA	1 A U, 1 J U	flat	old road	2	NA	NA
I_00110a.JPG		PB065_Cam2_9-23Sep_2016	2016-09-16	10:38:03	Ok	FALSE	Mila	PB	Spring	F6	PB065	-33.1359	18.0039	34	2	2016-09-09	2016-09-23	animal	0	0	NA	NA	cape mountain zebra	1	cape mountain zebra	1	Natural	NA	1 A U	flat	old road	2	NA	NA
I_00110b.JPG		PB065_Cam2_9-23Sep_2016	2016-09-16	10:38:03	Ok	FALSE	Mila	PB	Spring	F6	PB065	-33.1359	18.0039	34	2	2016-09-09	2016-09-23	animal	0	0	NA	NA	cape mountain zebra	1	cape mountain zebra	1	Natural	NA	1 A U	flat	old road	2	NA	NA
I_00110c.JPG		PB065_Cam2_9-23Sep_2016	2016-09-16	10:38:03	Ok	FALSE	Mila	PB	Spring	F6	PB065	-33.1359	18.0039	34	2	2016-09-09	2016-09-23	animal	0	0	NA	NA	cape mountain zebra	1	cape mountain zebra	1	Natural	NA	1 A U	flat	old road	2	NA	NA
I_00146a.JPG		PB065_Cam2_9-23Sep_2016	2016-09-19	04:20:54	Ok	FALSE	Mila	PB	Spring	F6	PB065	-33.1359	18.0039	34	2	2016-09-09	2016-09-23	animal	0	0	NA	NA	cape mountain zebra	1	cape mountain zebra	1	Natural	NA	1 A U	flat	old road	2	NA	NA
I_00171a.JPG		PB065_Cam2_9-23Sep_2016	2016-09-22	02:13:07	Ok	FALSE	Mila	PB	Spring	F6	PB065	-33.1359	18.0039	34	2	2016-09-09	2016-09-23	animal	0	0	NA	NA	cape mountain zebra	1	cape mountain zebra	1	Natural	NA	1 A U	flat	old road	2	NA	NA
I_00176b.JPG		PB065_Cam2_9-23Sep_2016	2016-09-22	18:05:32	Ok	FALSE	Mila	PB	Spring	F6	PB065	-33.1359	18.0039	34	2	2016-09-09	2016-09-23	animal	0	0	NA	NA	cape mountain zebra	1	cape mountain zebra	1	Natural	NA	1 A U	flat	old road	2	NA	NA
I_00176a.JPG		PB065_Cam2_9-23Sep_2016	2016-09-22	18:05:32	Ok	FALSE	Mila	PB	Spring	F6	PB065	-33.1359	18.0039	34	2	2016-09-09	2016-09-23	animal	0	0	NA	NA	cape mountain zebra	2	cape mountain zebra	2	Natural	NA	1 A U, 1 age and sex unknown	flat	old road	2	NA	NA
I_00005a.JPG		PB065_Cam2_9-23Sep_2016	2016-09-09	15:08:40	Ok	FALSE	Mila	PB	Spring	F6	PB065	-33.1359	18.0039	34	2	2016-09-09	2016-09-23	animal	0	0	NA	NA	cape spurfowl	1	cape spurfowl	1	Natural	NA	Unknown age and sex	flat	old road	2	NA	NA
I_00005b.JPG		PB065_Cam2_9-23Sep_2016	2016-09-09	15:08:40	Ok	FALSE	Mila	PB	Spring	F6	PB065	-33.1359	18.0039	34	2	2016-09-09	2016-09-23	animal	0	0	NA	NA	cape spurfowl	1	cape spurfowl	1	Natural	NA	Unknown sex and age	flat	old road	2	NA	NA
I_00008a.JPG		PB065_Cam2_9-23Sep_2016	2016-09-09	16:05:57	Ok	FALSE	Mila	PB	Spring	F6	PB065	-33.1359	18.0039	34	2	2016-09-09	2016-09-23	animal	0	0	NA	NA	cape spurfowl	1	cape spurfowl	1	Natural	NA	Unknown sex and age	flat	old road	2	NA	NA
I_00008b.JPG		PB065_Cam2_9-23Sep_2016	2016-09-09	16:05:57	Ok	FALSE	Mila	PB	Spring	F6	PB065	-33.1359	18.0039	34	2	2016-09-09	2016-09-23	animal	0	0	NA	NA	cape spurfowl	1	cape spurfowl	1	Natural	NA	Unknown sex and age	flat	old road	2	NA	NA
I_00009a.JPG		PB065_Cam2_9-23Sep_2016	2016-09-09	17:36:06	Ok	FALSE	Mila	PB	Spring	F6	PB065	-33.1359	18.0039	34	2	2016-09-09	2016-09-23	animal	0	0	NA	NA	cape spurfowl	1	cape spurfowl	1	Natural	NA	Unknown sex and age	flat	old road	2	NA	NA
I_00009b.JPG		PB065_Cam2_9-23Sep_2016	2016-09-09	17:36:06	Ok	FALSE	Mila	PB	Spring	F6	PB065	-33.1359	18.0039	34	2	2016-09-09	2016-09-23	animal	0	0	NA	NA	cape spurfowl	1	cape spurfowl	1	Natural	NA	Unknown sex and age	flat	old road	2	NA	NA
I_00009c.JPG		PB065_Cam2_9-23Sep_2016	2016-09-09	17:36:06	Ok	FALSE	Mila	PB	Spring	F6	PB065	-33.1359	18.0039	34	2	2016-09-09	2016-09-23	animal	0	0	NA	NA	cape spurfowl	1	cape spurfowl	1	Natural	NA	Unknown sex and age	flat	old road	2	NA	NA
I_00011a.JPG		PB065_Cam2_9-23Sep_2016	2016-09-10	08:13:48	Ok	FALSE	Mila	PB	Spring	F6	PB065	-33.1359	18.0039	34	2	2016-09-09	2016-09-23	animal	0	0	NA	NA	cape spurfowl	1	cape spurfowl	1	Natural	NA	Unknown sex and age	flat	old road	2	NA	NA
I_00011b.JPG		PB065_Cam2_9-23Sep_2016	2016-09-10	08:13:48	Ok	FALSE	Mila	PB	Spring	F6	PB065	-33.1359	18.0039	34	2	2016-09-09	2016-09-23	animal	0	0	NA	NA	cape spurfowl	1	cape spurfowl	1	Natural	NA	Unknown sex and age	flat	old road	2	NA	NA
I_00011c.JPG		PB065_Cam2_9-23Sep_2016	2016-09-10	08:13:48	Ok	FALSE	Mila	PB	Spring	F6	PB065	-33.1359	18.0039	34	2	2016-09-09	2016-09-23	animal	0	0	NA	NA	cape spurfowl	1	cape spurfowl	1	Natural	NA	Unknown sex and age	flat	old road	2	NA	NA
I_00014a.JPG		PB065_Cam2_9-23Sep_2016	2016-09-10	11:18:49	Ok	FALSE	Mila	PB	Spring	F6	PB065	-33.1359	18.0039	34	2	2016-09-09	2016-09-23	animal	0	0	NA	NA	cape spurfowl	1	cape spurfowl	1	Natural	NA	Unknown sex and age	flat	old road	2	NA	NA
I_00014b.JPG		PB065_Cam2_9-23Sep_2016	2016-09-10	11:18:49	Ok	FALSE	Mila	PB	Spring	F6	PB065	-33.1359	18.0039	34	2	2016-09-09	2016-09-23	animal	0	0	NA	NA	cape spurfowl	1	cape spurfowl	1	Natural	NA	Unknown sex and age	flat	old road	2	NA	NA
I_00014c.JPG		PB065_Cam2_9-23Sep_2016	2016-09-10	11:18:49	Ok	FALSE	Mila	PB	Spring	F6	PB065	-33.1359	18.0039	34	2	2016-09-09	2016-09-23	animal	0	0	NA	NA	cape spurfowl	1	cape spurfowl	1	Natural	NA	Unknown sex and age	flat	old road	2	NA	NA
I_00015a.JPG		PB065_Cam2_9-23Sep_2016	2016-09-10	11:19:19	Ok	FALSE	Mila	PB	Spring	F6	PB065	-33.1359	18.0039	34	2	2016-09-09	2016-09-23	animal	0	0	NA	NA	cape spurfowl	1	cape spurfowl	1	Natural	NA	Unknown sex and age	flat	old road	2	NA	NA
I_00015b.JPG		PB065_Cam2_9-23Sep_2016	2016-09-10	11:19:19	Ok	FALSE	Mila	PB	Spring	F6	PB065	-33.1359	18.0039	34	2	2016-09-09	2016-09-23	animal	0	0	NA	NA	cape spurfowl	1	cape spurfowl	1	Natural	NA	Unknown sex and age	flat	old road	2	NA	NA
I_00015c.JPG		PB065_Cam2_9-23Sep_2016	2016-09-10	11:19:19	Ok	FALSE	Mila	PB	Spring	F6	PB065	-33.1359	18.0039	34	2	2016-09-09	2016-09-23	animal	0	0	NA	NA	cape spurfowl	1	cape spurfowl	1	Natural	NA	Unknown sex and age	flat	old road	2	NA	NA
I_00025a.JPG		PB065_Cam2_9-23Sep_2016	2016-09-10	14:12:31	Ok	FALSE	Mila	PB	Spring	F6	PB065	-33.1359	18.0039	34	2	2016-09-09	2016-09-23	animal	0	0	NA	NA	cape spurfowl	1	cape spurfowl	1	Natural	NA	Unknown sex and age	flat	old road	2	NA	NA
I_00025b.JPG		PB065_Cam2_9-23Sep_2016	2016-09-10	14:12:31	Ok	FALSE	Mila	PB	Spring	F6	PB065	-33.1359	18.0039	34	2	2016-09-09	2016-09-23	animal	0	0	NA	NA	cape spurfowl	1	cape spurfowl	1	Natural	NA	Unknown sex and age	flat	old road	2	NA	NA
I_00025c.JPG		PB065_Cam2_9-23Sep_2016	2016-09-10	14:12:31	Ok	FALSE	Mila	PB	Spring	F6	PB065	-33.1359	18.0039	34	2	2016-09-09	2016-09-23	animal	0	0	NA	NA	cape spurfowl	1	cape spurfowl	1	Natural	NA	Unknown sex and age	flat	old road	2	NA	NA
I_00026a.JPG		PB065_Cam2_9-23Sep_2016	2016-09-10	14:29:15	Ok	FALSE	Mila	PB	Spring	F6	PB065	-33.1359	18.0039	34	2	2016-09-09	2016-09-23	animal	0	0	NA	NA	cape spurfowl	1	cape spurfowl	1	Natural	NA	Unknown sex and age	flat	old road	2	NA	NA
I_00026b.JPG		PB065_Cam2_9-23Sep_2016	2016-09-10	14:29:15	Ok	FALSE	Mila	PB	Spring	F6	PB065	-33.1359	18.0039	34	2	2016-09-09	2016-09-23	animal	0	0	NA	NA	cape spurfowl	1	cape spurfowl	1	Natural	NA	Unknown sex and age	flat	old road	2	NA	NA
I_00027a.JPG		PB065_Cam2_9-23Sep_2016	2016-09-10	15:54:04	Ok	FALSE	Mila	PB	Spring	F6	PB065	-33.1359	18.0039	34	2	2016-09-09	2016-09-23	animal	0	0	NA	NA	cape spurfowl	1	cape spurfowl	1	Natural	NA	Unknown sex and age	flat	old road	2	NA	NA
I_00028a.JPG		PB065_Cam2_9-23Sep_2016	2016-09-10	16:19:58	Ok	FALSE	Mila	PB	Spring	F6	PB065	-33.1359	18.0039	34	2	2016-09-09	2016-09-23	animal	0	0	NA	NA	cape spurfowl	1	cape spurfowl	1	Natural	NA	Unknown sex and age	flat	old road	2	NA	NA
I_00028b.JPG		PB065_Cam2_9-23Sep_2016	2016-09-10	16:19:58	Ok	FALSE	Mila	PB	Spring	F6	PB065	-33.1359	18.0039	34	2	2016-09-09	2016-09-23	animal	0	0	NA	NA	cape spurfowl	1	cape spurfowl	1	Natural	NA	Unknown sex and age	flat	old road	2	NA	NA
I_00037b.JPG		PB065_Cam2_9-23Sep_2016	2016-09-11	13:21:16	Ok	FALSE	Mila	PB	Spring	F6	PB065	-33.1359	18.0039	34	2	2016-09-09	2016-09-23	animal	0	0	NA	NA	cape spurfowl	1	cape spurfowl	1	Natural	NA	Age and sex unknown	flat	old road	2	NA	NA
I_00038a.JPG		PB065_Cam2_9-23Sep_2016	2016-09-11	13:30:19	Ok	FALSE	Mila	PB	Spring	F6	PB065	-33.1359	18.0039	34	2	2016-09-09	2016-09-23	animal	0	0	NA	NA	cape spurfowl	1	cape spurfowl	1	Natural	NA	Age and sex unknown	flat	old road	2	NA	NA
I_00039a.JPG		PB065_Cam2_9-23Sep_2016	2016-09-11	13:34:58	Ok	FALSE	Mila	PB	Spring	F6	PB065	-33.1359	18.0039	34	2	2016-09-09	2016-09-23	animal	0	0	NA	NA	cape spurfowl	1	cape spurfowl	1	Natural	NA	Age and sex unknown	flat	old road	2	NA	NA
I_00040a.JPG		PB065_Cam2_9-23Sep_2016	2016-09-11	13:59:26	Ok	FALSE	Mila	PB	Spring	F6	PB065	-33.1359	18.0039	34	2	2016-09-09	2016-09-23	animal	0	0	NA	NA	cape spurfowl	1	cape spurfowl	1	Natural	NA	Age and sex unknown	flat	old road	2	NA	NA
I_00042b.JPG		PB065_Cam2_9-23Sep_2016	2016-09-11	14:20:02	Ok	FALSE	Mila	PB	Spring	F6	PB065	-33.1359	18.0039	34	2	2016-09-09	2016-09-23	animal	0	0	NA	NA	cape spurfowl	1	cape spurfowl	1	Natural	NA	Age and sex unknown	flat	old road	2	NA	NA
I_00043b.JPG		PB065_Cam2_9-23Sep_2016	2016-09-11	14:32:30	Ok	FALSE	Mila	PB	Spring	F6	PB065	-33.1359	18.0039	34	2	2016-09-09	2016-09-23	animal	0	0	NA	NA	cape spurfowl	1	cape spurfowl	1	Natural	NA	Age and sex unknown	flat	old road	2	NA	NA
I_00043c.JPG		PB065_Cam2_9-23Sep_2016	2016-09-11	14:32:30	Ok	FALSE	Mila	PB	Spring	F6	PB065	-33.1359	18.0039	34	2	2016-09-09	2016-09-23	animal	0	0	NA	NA	cape spurfowl	1	cape spurfowl	1	Natural	NA	Age and sex unknown	flat	old road	2	NA	NA
I_00044b.JPG		PB065_Cam2_9-23Sep_2016	2016-09-11	14:33:02	Ok	FALSE	Mila	PB	Spring	F6	PB065	-33.1359	18.0039	34	2	2016-09-09	2016-09-23	animal	0	0	NA	NA	cape spurfowl	1	cape spurfowl	1	Natural	NA	Age and sex unknown	flat	old road	2	NA	NA
I_00044c.JPG		PB065_Cam2_9-23Sep_2016	2016-09-11	14:33:02	Ok	FALSE	Mila	PB	Spring	F6	PB065	-33.1359	18.0039	34	2	2016-09-09	2016-09-23	animal	0	0	NA	NA	cape spurfowl	1	cape spurfowl	1	Natural	NA	Age and sex unknown	flat	old road	2	NA	NA
I_00047a.JPG		PB065_Cam2_9-23Sep_2016	2016-09-11	15:32:26	Ok	FALSE	Mila	PB	Spring	F6	PB065	-33.1359	18.0039	34	2	2016-09-09	2016-09-23	animal	0	0	NA	NA	cape spurfowl	1	cape spurfowl	1	Natural	NA	Unknown sex and age	flat	old road	2	NA	NA
I_00047b.JPG		PB065_Cam2_9-23Sep_2016	2016-09-11	15:32:26	Ok	FALSE	Mila	PB	Spring	F6	PB065	-33.1359	18.0039	34	2	2016-09-09	2016-09-23	animal	0	0	NA	NA	cape spurfowl	1	cape spurfowl	1	Natural	NA	Unknown sex and age	flat	old road	2	NA	NA
I_00047c.JPG		PB065_Cam2_9-23Sep_2016	2016-09-11	15:32:26	Ok	FALSE	Mila	PB	Spring	F6	PB065	-33.1359	18.0039	34	2	2016-09-09	2016-09-23	animal	0	0	NA	NA	cape spurfowl	1	cape spurfowl	1	Natural	NA	Unknown sex and age	flat	old road	2	NA	NA
I_00063a.JPG		PB065_Cam2_9-23Sep_2016	2016-09-13	15:37:12	Ok	FALSE	Mila	PB	Spring	F6	PB065	-33.1359	18.0039	34	2	2016-09-09	2016-09-23	animal	0	0	NA	NA	cape spurfowl	1	cape spurfowl	1	Natural	NA	Unknown sex and age	flat	old road	2	NA	NA
I_00064a.JPG		PB065_Cam2_9-23Sep_2016	2016-09-13	17:01:23	Ok	FALSE	Mila	PB	Spring	F6	PB065	-33.1359	18.0039	34	2	2016-09-09	2016-09-23	animal	0	0	NA	NA	cape spurfowl	1	cape spurfowl	1	Natural	NA	Unknown sex and age	flat	old road	2	NA	NA
I_00064b.JPG		PB065_Cam2_9-23Sep_2016	2016-09-13	17:01:23	Ok	FALSE	Mila	PB	Spring	F6	PB065	-33.1359	18.0039	34	2	2016-09-09	2016-09-23	animal	0	0	NA	NA	cape spurfowl	1	cape spurfowl	1	Natural	NA	Unknown sex and age	flat	old road	2	NA	NA
I_00131b.JPG		PB065_Cam2_9-23Sep_2016	2016-09-18	13:33:31	Ok	FALSE	Mila	PB	Spring	F6	PB065	-33.1359	18.0039	34	2	2016-09-09	2016-09-23	animal	0	0	NA	NA	cape spurfowl	1	cape spurfowl	1	Natural	NA	Unknown age and sex	flat	old road	2	NA	NA
I_00132b.JPG		PB065_Cam2_9-23Sep_2016	2016-09-18	13:38:54	Ok	FALSE	Mila	PB	Spring	F6	PB065	-33.1359	18.0039	34	2	2016-09-09	2016-09-23	animal	0	0	NA	NA	cape spurfowl	1	cape spurfowl	1	Natural	NA	Unknown age and sex	flat	old road	2	NA	NA
I_00132a.JPG		PB065_Cam2_9-23Sep_2016	2016-09-18	13:38:54	Ok	FALSE	Mila	PB	Spring	F6	PB065	-33.1359	18.0039	34	2	2016-09-09	2016-09-23	animal	0	0	NA	NA	cape spurfowl	1	cape spurfowl	1	Natural	NA	Unknown age and sex	flat	old road	2	NA	NA
I_00152b.JPG		PB065_Cam2_9-23Sep_2016	2016-09-19	11:54:53	Ok	FALSE	Mila	PB	Spring	F6	PB065	-33.1359	18.0039	34	2	2016-09-09	2016-09-23	animal	0	0	NA	NA	cape spurfowl	1	cape spurfowl	1	Natural	NA	Unknown age and sex	flat	old road	2	NA	NA
I_00153a.JPG		PB065_Cam2_9-23Sep_2016	2016-09-19	12:08:57	Ok	FALSE	Mila	PB	Spring	F6	PB065	-33.1359	18.0039	34	2	2016-09-09	2016-09-23	animal	0	0	NA	NA	cape spurfowl	1	cape spurfowl	1	Natural	NA	Unknown age and sex	flat	old road	2	NA	NA
I_00153b.JPG		PB065_Cam2_9-23Sep_2016	2016-09-19	12:08:57	Ok	FALSE	Mila	PB	Spring	F6	PB065	-33.1359	18.0039	34	2	2016-09-09	2016-09-23	animal	0	0	NA	NA	cape spurfowl	1	cape spurfowl	1	Natural	NA	Unknown age and sex	flat	old road	2	NA	NA
I_00154a.JPG		PB065_Cam2_9-23Sep_2016	2016-09-19	12:13:16	Ok	FALSE	Mila	PB	Spring	F6	PB065	-33.1359	18.0039	34	2	2016-09-09	2016-09-23	animal	0	0	NA	NA	cape spurfowl	1	cape spurfowl	1	Natural	NA	Unknown age and sex	flat	old road	2	NA	NA
I_00158b.JPG		PB065_Cam2_9-23Sep_2016	2016-09-19	13:49:16	Ok	FALSE	Mila	PB	Spring	F6	PB065	-33.1359	18.0039	34	2	2016-09-09	2016-09-23	animal	0	0	NA	NA	cape spurfowl	1	cape spurfowl	1	Natural	NA	Unknown age and sex	flat	old road	2	NA	NA
I_00103a.JPG		PB065_Cam2_9-23Sep_2016	2016-09-16	00:57:59	Ok	FALSE	Mila	PB	Spring	F6	PB065	-33.1359	18.0039	34	2	2016-09-09	2016-09-23	animal	1	1	moving	NA	NA	0	caracal	1	Natural	NA	NA	flat	old road	2	Unknown	NA
I_00177a.JPG		PB065_Cam2_9-23Sep_2016	2016-09-23	02:05:46	Ok	FALSE	Mila	PB	Spring	F6	PB065	-33.1359	18.0039	34	2	2016-09-09	2016-09-23	animal	1	1	moving	NA	NA	0	caracal	1	Natural	NA	NA	flat	old road	2	Unknown	NA
I_00036c.JPG		PB065_Cam2_9-23Sep_2016	2016-09-11	11:32:17	Ok	FALSE	Mila	PB	Spring	F6	PB065	-33.1359	18.0039	34	2	2016-09-09	2016-09-23	animal	0	0	NA	NA	cattle egret	1	cattle egret	1	Natural	NA	1 cattle egret	flat	old road	2	NA	adult male
I_00036a.JPG		PB065_Cam2_9-23Sep_2016	2016-09-11	11:32:17	Ok	FALSE	Mila	PB	Spring	F6	PB065	-33.1359	18.0039	34	2	2016-09-09	2016-09-23	animal	0	0	NA	NA	cattle egret	2	cattle egret	2	Natural	NA	4 A M, 2 A U, 1 cattle egret	flat	old road	2	NA	NA
I_00036b.JPG		PB065_Cam2_9-23Sep_2016	2016-09-11	11:32:17	Ok	FALSE	Mila	PB	Spring	F6	PB065	-33.1359	18.0039	34	2	2016-09-09	2016-09-23	animal	0	0	NA	NA	cattle egret	2	cattle egret	2	Natural	NA	2 A M, cattle egret	flat	old road	2	NA	NA
I_00045c.JPG		PB065_Cam2_9-23Sep_2016	2016-09-11	14:57:21	Ok	FALSE	Mila	PB	Spring	F6	PB065	-33.1359	18.0039	34	2	2016-09-09	2016-09-23	animal	0	0	NA	NA	cattle egret	1	cattle egret	1	Natural	NA	Unknown sex and age	flat	old road	2	NA	NA
I_00078c.JPG		PB065_Cam2_9-23Sep_2016	2016-09-14	11:27:41	Ok	FALSE	Mila	PB	Spring	F6	PB065	-33.1359	18.0039	34	2	2016-09-09	2016-09-23	animal	0	0	NA	NA	cattle egret	3	cattle egret	3	Natural	NA	3 cattle egret	flat	old road	2	NA	adult female
I_00078a.JPG		PB065_Cam2_9-23Sep_2016	2016-09-14	11:27:41	Ok	FALSE	Mila	PB	Spring	F6	PB065	-33.1359	18.0039	34	2	2016-09-09	2016-09-23	animal	0	0	NA	NA	cattle egret	4	cattle egret	4	Natural	NA	4 cattle egret	flat	old road	2	NA	adult female
I_00078b.JPG		PB065_Cam2_9-23Sep_2016	2016-09-14	11:27:41	Ok	FALSE	Mila	PB	Spring	F6	PB065	-33.1359	18.0039	34	2	2016-09-09	2016-09-23	animal	0	0	NA	NA	cattle egret	5	cattle egret	5	Natural	NA	5 cattle egret	flat	old road	2	NA	adult female
I_00079a.JPG		PB065_Cam2_9-23Sep_2016	2016-09-14	11:28:38	Ok	FALSE	Mila	PB	Spring	F6	PB065	-33.1359	18.0039	34	2	2016-09-09	2016-09-23	animal	0	0	NA	NA	cattle egret	2	cattle egret	2	Natural	NA	cattle egret	flat	old road	2	NA	adult female
I_00079b.JPG		PB065_Cam2_9-23Sep_2016	2016-09-14	11:28:38	Ok	FALSE	Mila	PB	Spring	F6	PB065	-33.1359	18.0039	34	2	2016-09-09	2016-09-23	animal	0	0	NA	NA	cattle egret	2	cattle egret	2	Natural	NA	cattle egret	flat	old road	2	NA	adult female
I_00079c.JPG		PB065_Cam2_9-23Sep_2016	2016-09-14	11:28:38	Ok	FALSE	Mila	PB	Spring	F6	PB065	-33.1359	18.0039	34	2	2016-09-09	2016-09-23	animal	0	0	NA	NA	cattle egret	2	cattle egret	2	Natural	NA	cattle egret	flat	old road	2	NA	adult female
I_00080a.JPG		PB065_Cam2_9-23Sep_2016	2016-09-14	11:29:11	Ok	FALSE	Mila	PB	Spring	F6	PB065	-33.1359	18.0039	34	2	2016-09-09	2016-09-23	animal	0	0	NA	NA	cattle egret	1	cattle egret	1	Natural	NA	NA	flat	old road	2	NA	adult female
I_00080c.JPG		PB065_Cam2_9-23Sep_2016	2016-09-14	11:29:11	Ok	FALSE	Mila	PB	Spring	F6	PB065	-33.1359	18.0039	34	2	2016-09-09	2016-09-23	animal	0	0	NA	NA	cattle egret	1	cattle egret	1	Natural	NA	1 cattle egret	flat	old road	2	NA	adult female
I_00081c.JPG		PB065_Cam2_9-23Sep_2016	2016-09-14	11:29:37	Ok	FALSE	Mila	PB	Spring	F6	PB065	-33.1359	18.0039	34	2	2016-09-09	2016-09-23	animal	0	0	NA	NA	cattle egret	1	cattle egret	1	Natural	NA	1 cattle egret	flat	old road	2	NA	adult female
I_00081a.JPG		PB065_Cam2_9-23Sep_2016	2016-09-14	11:29:37	Ok	FALSE	Mila	PB	Spring	F6	PB065	-33.1359	18.0039	34	2	2016-09-09	2016-09-23	animal	0	0	NA	NA	cattle egret	1	cattle egret	1	Natural	NA	1 cattle egret	flat	old road	2	NA	adult female
I_00082a.JPG		PB065_Cam2_9-23Sep_2016	2016-09-14	11:30:02	Ok	FALSE	Mila	PB	Spring	F6	PB065	-33.1359	18.0039	34	2	2016-09-09	2016-09-23	animal	0	0	NA	NA	cattle egret	2	cattle egret	2	Natural	NA	cattle egret	flat	old road	2	NA	adult female
I_00082b.JPG		PB065_Cam2_9-23Sep_2016	2016-09-14	11:30:02	Ok	FALSE	Mila	PB	Spring	F6	PB065	-33.1359	18.0039	34	2	2016-09-09	2016-09-23	animal	0	0	NA	NA	cattle egret	2	cattle egret	2	Natural	NA	cattle egret	flat	old road	2	NA	adult female
I_00082c.JPG		PB065_Cam2_9-23Sep_2016	2016-09-14	11:30:02	Ok	FALSE	Mila	PB	Spring	F6	PB065	-33.1359	18.0039	34	2	2016-09-09	2016-09-23	animal	0	0	NA	NA	cattle egret	2	cattle egret	2	Natural	NA	cattle egret	flat	old road	2	NA	adult female
I_00084a.JPG		PB065_Cam2_9-23Sep_2016	2016-09-14	11:31:47	Ok	FALSE	Mila	PB	Spring	F6	PB065	-33.1359	18.0039	34	2	2016-09-09	2016-09-23	animal	0	0	NA	NA	cattle egret	1	cattle egret	1	Natural	NA	1 cattle egret	flat	old road	2	NA	adult female
I_00084b.JPG		PB065_Cam2_9-23Sep_2016	2016-09-14	11:31:47	Ok	FALSE	Mila	PB	Spring	F6	PB065	-33.1359	18.0039	34	2	2016-09-09	2016-09-23	animal	0	0	NA	NA	cattle egret	1	cattle egret	1	Natural	NA	1 cattle egret	flat	old road	2	NA	adult female
I_00084c.JPG		PB065_Cam2_9-23Sep_2016	2016-09-14	11:31:47	Ok	FALSE	Mila	PB	Spring	F6	PB065	-33.1359	18.0039	34	2	2016-09-09	2016-09-23	animal	0	0	NA	NA	cattle egret	1	cattle egret	1	Natural	NA	1 cattle egret	flat	old road	2	NA	adult female
I_00035a.JPG		PB065_Cam2_9-23Sep_2016	2016-09-11	11:31:53	Ok	FALSE	Mila	PB	Spring	F6	PB065	-33.1359	18.0039	34	2	2016-09-09	2016-09-23	animal	0	0	NA	NA	eland	1	eland	1	Natural	NA	NA	flat	old road	2	NA	adult male
I_00035b.JPG		PB065_Cam2_9-23Sep_2016	2016-09-11	11:31:53	Ok	FALSE	Mila	PB	Spring	F6	PB065	-33.1359	18.0039	34	2	2016-09-09	2016-09-23	animal	0	0	NA	NA	eland	1	eland	1	Natural	NA	NA	flat	old road	2	NA	adult male
I_00036c.JPG		PB065_Cam2_9-23Sep_2016	2016-09-11	11:32:17	Ok	FALSE	Mila	PB	Spring	F6	PB065	-33.1359	18.0039	34	2	2016-09-09	2016-09-23	animal	0	0	NA	NA	eland	1	eland	1	Natural	NA	1 cattle egret	flat	old road	2	NA	adult male
I_00036b.JPG		PB065_Cam2_9-23Sep_2016	2016-09-11	11:32:17	Ok	FALSE	Mila	PB	Spring	F6	PB065	-33.1359	18.0039	34	2	2016-09-09	2016-09-23	animal	0	0	NA	NA	eland	2	eland	2	Natural	NA	2 A M, cattle egret	flat	old road	2	NA	NA
I_00036a.JPG		PB065_Cam2_9-23Sep_2016	2016-09-11	11:32:17	Ok	FALSE	Mila	PB	Spring	F6	PB065	-33.1359	18.0039	34	2	2016-09-09	2016-09-23	animal	0	0	NA	NA	eland	6	eland	6	Natural	NA	4 A M, 2 A U, 1 cattle egret	flat	old road	2	NA	NA
I_00045a.JPG		PB065_Cam2_9-23Sep_2016	2016-09-11	14:57:21	Ok	FALSE	Mila	PB	Spring	F6	PB065	-33.1359	18.0039	34	2	2016-09-09	2016-09-23	animal	0	0	NA	NA	eland	1	eland	1	Natural	NA	NA	flat	old road	2	NA	adult male
I_00045b.JPG		PB065_Cam2_9-23Sep_2016	2016-09-11	14:57:21	Ok	FALSE	Mila	PB	Spring	F6	PB065	-33.1359	18.0039	34	2	2016-09-09	2016-09-23	animal	0	0	NA	NA	eland	1	eland	1	Natural	NA	NA	flat	old road	2	NA	adult male
I_00046a.JPG		PB065_Cam2_9-23Sep_2016	2016-09-11	15:00:53	Ok	FALSE	Mila	PB	Spring	F6	PB065	-33.1359	18.0039	34	2	2016-09-09	2016-09-23	animal	0	0	NA	NA	eland	1	eland	1	Natural	NA	NA	flat	old road	2	NA	adult male
I_00046b.JPG		PB065_Cam2_9-23Sep_2016	2016-09-11	15:00:53	Ok	FALSE	Mila	PB	Spring	F6	PB065	-33.1359	18.0039	34	2	2016-09-09	2016-09-23	animal	0	0	NA	NA	eland	1	eland	1	Natural	NA	NA	flat	old road	2	NA	adult male
I_00094a.JPG		PB065_Cam2_9-23Sep_2016	2016-09-14	17:28:33	Ok	FALSE	Mila	PB	Spring	F6	PB065	-33.1359	18.0039	34	2	2016-09-09	2016-09-23	animal	0	0	NA	NA	eland	1	eland	1	Natural	NA	NA	flat	old road	2	NA	adult male
I_00094b.JPG		PB065_Cam2_9-23Sep_2016	2016-09-14	17:28:33	Ok	FALSE	Mila	PB	Spring	F6	PB065	-33.1359	18.0039	34	2	2016-09-09	2016-09-23	animal	0	0	NA	NA	eland	1	eland	1	Natural	NA	NA	flat	old road	2	NA	adult male
I_00099c.JPG		PB065_Cam2_9-23Sep_2016	2016-09-15	18:43:03	Ok	FALSE	Mila	PB	Spring	F6	PB065	-33.1359	18.0039	34	2	2016-09-09	2016-09-23	animal	0	0	NA	NA	eland	1	eland	1	Natural	NA	NA	flat	old road	2	NA	adult male
I_00099a.JPG		PB065_Cam2_9-23Sep_2016	2016-09-15	18:43:03	Ok	FALSE	Mila	PB	Spring	F6	PB065	-33.1359	18.0039	34	2	2016-09-09	2016-09-23	animal	0	0	NA	NA	eland	1	eland	1	Natural	NA	NA	flat	old road	2	NA	adult male
I_00099b.JPG		PB065_Cam2_9-23Sep_2016	2016-09-15	18:43:03	Ok	FALSE	Mila	PB	Spring	F6	PB065	-33.1359	18.0039	34	2	2016-09-09	2016-09-23	animal	0	0	NA	NA	eland	1	eland	1	Natural	NA	NA	flat	old road	2	NA	adult male
I_00100a.JPG		PB065_Cam2_9-23Sep_2016	2016-09-15	18:43:29	Ok	FALSE	Mila	PB	Spring	F6	PB065	-33.1359	18.0039	34	2	2016-09-09	2016-09-23	animal	0	0	NA	NA	eland	1	eland	1	Natural	NA	NA	flat	old road	2	NA	adult male
I_00101a.JPG		PB065_Cam2_9-23Sep_2016	2016-09-15	18:44:10	Ok	FALSE	Mila	PB	Spring	F6	PB065	-33.1359	18.0039	34	2	2016-09-09	2016-09-23	animal	0	0	NA	NA	eland	1	eland	1	Natural	NA	NA	flat	old road	2	NA	adult male
I_00114b.JPG		PB065_Cam2_9-23Sep_2016	2016-09-17	06:32:26	Ok	FALSE	Mila	PB	Spring	F6	PB065	-33.1359	18.0039	34	2	2016-09-09	2016-09-23	animal	0	0	NA	NA	eland	1	eland	1	Natural	NA	NA	flat	old road	2	NA	adult male
I_00114c.JPG		PB065_Cam2_9-23Sep_2016	2016-09-17	06:32:26	Ok	FALSE	Mila	PB	Spring	F6	PB065	-33.1359	18.0039	34	2	2016-09-09	2016-09-23	animal	0	0	NA	NA	eland	1	eland	1	Natural	NA	NA	flat	old road	2	NA	adult male
I_00115a.JPG		PB065_Cam2_9-23Sep_2016	2016-09-17	06:33:17	Ok	FALSE	Mila	PB	Spring	F6	PB065	-33.1359	18.0039	34	2	2016-09-09	2016-09-23	animal	0	0	NA	NA	eland	1	eland	1	Natural	NA	NA	flat	old road	2	NA	adult male
I_00115b.JPG		PB065_Cam2_9-23Sep_2016	2016-09-17	06:33:17	Ok	FALSE	Mila	PB	Spring	F6	PB065	-33.1359	18.0039	34	2	2016-09-09	2016-09-23	animal	0	0	NA	NA	eland	1	eland	1	Natural	NA	NA	flat	old road	2	NA	adult male
I_00115c.JPG		PB065_Cam2_9-23Sep_2016	2016-09-17	06:33:17	Ok	FALSE	Mila	PB	Spring	F6	PB065	-33.1359	18.0039	34	2	2016-09-09	2016-09-23	animal	0	0	NA	NA	eland	1	eland	1	Natural	NA	NA	flat	old road	2	NA	adult male
I_00116a.JPG		PB065_Cam2_9-23Sep_2016	2016-09-17	06:33:41	Ok	FALSE	Mila	PB	Spring	F6	PB065	-33.1359	18.0039	34	2	2016-09-09	2016-09-23	animal	0	0	NA	NA	eland	1	eland	1	Natural	NA	NA	flat	old road	2	NA	adult male
I_00116b.JPG		PB065_Cam2_9-23Sep_2016	2016-09-17	06:33:41	Ok	FALSE	Mila	PB	Spring	F6	PB065	-33.1359	18.0039	34	2	2016-09-09	2016-09-23	animal	0	0	NA	NA	eland	1	eland	1	Natural	NA	NA	flat	old road	2	NA	adult male
I_00116c.JPG		PB065_Cam2_9-23Sep_2016	2016-09-17	06:33:41	Ok	FALSE	Mila	PB	Spring	F6	PB065	-33.1359	18.0039	34	2	2016-09-09	2016-09-23	animal	0	0	NA	NA	eland	1	eland	1	Natural	NA	NA	flat	old road	2	NA	adult male
I_00117a.JPG		PB065_Cam2_9-23Sep_2016	2016-09-17	06:34:05	Ok	FALSE	Mila	PB	Spring	F6	PB065	-33.1359	18.0039	34	2	2016-09-09	2016-09-23	animal	0	0	NA	NA	eland	1	eland	1	Natural	NA	NA	flat	old road	2	NA	adult male
I_00117b.JPG		PB065_Cam2_9-23Sep_2016	2016-09-17	06:34:05	Ok	FALSE	Mila	PB	Spring	F6	PB065	-33.1359	18.0039	34	2	2016-09-09	2016-09-23	animal	0	0	NA	NA	eland	1	eland	1	Natural	NA	NA	flat	old road	2	NA	adult male
I_00117c.JPG		PB065_Cam2_9-23Sep_2016	2016-09-17	06:34:05	Ok	FALSE	Mila	PB	Spring	F6	PB065	-33.1359	18.0039	34	2	2016-09-09	2016-09-23	animal	0	0	NA	NA	eland	1	eland	1	Natural	NA	NA	flat	old road	2	NA	adult male
I_00118b.JPG		PB065_Cam2_9-23Sep_2016	2016-09-17	06:34:27	Ok	FALSE	Mila	PB	Spring	F6	PB065	-33.1359	18.0039	34	2	2016-09-09	2016-09-23	animal	0	0	NA	NA	eland	1	eland	1	Natural	NA	NA	flat	old road	2	NA	adult male
I_00118c.JPG		PB065_Cam2_9-23Sep_2016	2016-09-17	06:34:27	Ok	FALSE	Mila	PB	Spring	F6	PB065	-33.1359	18.0039	34	2	2016-09-09	2016-09-23	animal	0	0	NA	NA	eland	1	eland	1	Natural	NA	NA	flat	old road	2	NA	adult male
I_00118a.JPG		PB065_Cam2_9-23Sep_2016	2016-09-17	06:34:27	Ok	FALSE	Mila	PB	Spring	F6	PB065	-33.1359	18.0039	34	2	2016-09-09	2016-09-23	animal	0	0	NA	NA	eland	1	eland	1	Natural	NA	NA	flat	old road	2	NA	adult male
I_00119a.JPG		PB065_Cam2_9-23Sep_2016	2016-09-17	06:35:23	Ok	FALSE	Mila	PB	Spring	F6	PB065	-33.1359	18.0039	34	2	2016-09-09	2016-09-23	animal	0	0	NA	NA	eland	1	eland	1	Natural	NA	NA	flat	old road	2	NA	adult male
I_00119b.JPG		PB065_Cam2_9-23Sep_2016	2016-09-17	06:35:23	Ok	FALSE	Mila	PB	Spring	F6	PB065	-33.1359	18.0039	34	2	2016-09-09	2016-09-23	animal	0	0	NA	NA	eland	1	eland	1	Natural	NA	NA	flat	old road	2	NA	adult male
I_00119c.JPG		PB065_Cam2_9-23Sep_2016	2016-09-17	06:35:23	Ok	FALSE	Mila	PB	Spring	F6	PB065	-33.1359	18.0039	34	2	2016-09-09	2016-09-23	animal	0	0	NA	NA	eland	1	eland	1	Natural	NA	NA	flat	old road	2	NA	adult male
I_00126a.JPG		PB065_Cam2_9-23Sep_2016	2016-09-18	04:23:05	Ok	FALSE	Mila	PB	Spring	F6	PB065	-33.1359	18.0039	34	2	2016-09-09	2016-09-23	animal	0	0	NA	NA	eland	1	eland	1	Natural	NA	1 A U	flat	old road	2	NA	NA
I_00126b.JPG		PB065_Cam2_9-23Sep_2016	2016-09-18	04:23:05	Ok	FALSE	Mila	PB	Spring	F6	PB065	-33.1359	18.0039	34	2	2016-09-09	2016-09-23	animal	0	0	NA	NA	eland	1	eland	1	Natural	NA	1 A U	flat	old road	2	NA	NA
I_00161b.JPG		PB065_Cam2_9-23Sep_2016	2016-09-20	02:27:54	Ok	FALSE	Mila	PB	Spring	F6	PB065	-33.1359	18.0039	34	2	2016-09-09	2016-09-23	animal	0	0	NA	NA	eland	1	eland	1	Natural	NA	Species unknown	flat	old road	2	NA	NA
I_00161a.JPG		PB065_Cam2_9-23Sep_2016	2016-09-20	02:27:54	Ok	FALSE	Mila	PB	Spring	F6	PB065	-33.1359	18.0039	34	2	2016-09-09	2016-09-23	animal	0	0	NA	NA	eland	1	eland	1	Natural	NA	Species unknown	flat	old road	2	NA	NA
I_00001a.JPG		PB065_Cam2_9-23Sep_2016	2016-09-09	14:53:25	Ok	FALSE	Mila	PB	Spring	F6	PB065	-33.1359	18.0039	34	2	2016-09-09	2016-09-23	animal	0	0	NA	NA	guinea fowl	1	guinea fowl	1	Natural	NA	Unknown age and sex	flat	old road	2	NA	NA
I_00001b.JPG		PB065_Cam2_9-23Sep_2016	2016-09-09	14:53:25	Ok	FALSE	Mila	PB	Spring	F6	PB065	-33.1359	18.0039	34	2	2016-09-09	2016-09-23	animal	0	0	NA	NA	guinea fowl	1	guinea fowl	1	Natural	NA	Unknown age and sex	flat	old road	2	NA	NA
I_00001c.JPG		PB065_Cam2_9-23Sep_2016	2016-09-09	14:53:25	Ok	FALSE	Mila	PB	Spring	F6	PB065	-33.1359	18.0039	34	2	2016-09-09	2016-09-23	animal	0	0	NA	NA	guinea fowl	1	guinea fowl	1	Natural	NA	Unknown age and sex	flat	old road	2	NA	NA
I_00004a.JPG		PB065_Cam2_9-23Sep_2016	2016-09-09	15:06:39	Ok	FALSE	Mila	PB	Spring	F6	PB065	-33.1359	18.0039	34	2	2016-09-09	2016-09-23	animal	0	0	NA	NA	guinea fowl	1	guinea fowl	1	Natural	NA	Unknown age and sex	flat	old road	2	NA	NA
I_00007a.JPG		PB065_Cam2_9-23Sep_2016	2016-09-09	15:30:27	Ok	FALSE	Mila	PB	Spring	F6	PB065	-33.1359	18.0039	34	2	2016-09-09	2016-09-23	animal	0	0	NA	NA	guinea fowl	1	guinea fowl	1	Natural	NA	Unknown sex and age	flat	old road	2	NA	NA
I_00007b.JPG		PB065_Cam2_9-23Sep_2016	2016-09-09	15:30:27	Ok	FALSE	Mila	PB	Spring	F6	PB065	-33.1359	18.0039	34	2	2016-09-09	2016-09-23	animal	0	0	NA	NA	guinea fowl	1	guinea fowl	1	Natural	NA	Unknown sex and age	flat	old road	2	NA	NA
I_00007c.JPG		PB065_Cam2_9-23Sep_2016	2016-09-09	15:30:27	Ok	FALSE	Mila	PB	Spring	F6	PB065	-33.1359	18.0039	34	2	2016-09-09	2016-09-23	animal	0	0	NA	NA	guinea fowl	1	guinea fowl	1	Natural	NA	Unknown sex and age	flat	old road	2	NA	NA
I_00010a.JPG		PB065_Cam2_9-23Sep_2016	2016-09-09	18:27:10	Ok	FALSE	Mila	PB	Spring	F6	PB065	-33.1359	18.0039	34	2	2016-09-09	2016-09-23	animal	0	0	NA	NA	guinea fowl	1	guinea fowl	1	Natural	NA	Unknown sex and age	flat	old road	2	NA	NA
I_00010b.JPG		PB065_Cam2_9-23Sep_2016	2016-09-09	18:27:10	Ok	FALSE	Mila	PB	Spring	F6	PB065	-33.1359	18.0039	34	2	2016-09-09	2016-09-23	animal	0	0	NA	NA	guinea fowl	2	guinea fowl	2	Natural	NA	Unknown sex and age	flat	old road	2	NA	NA
I_00010c.JPG		PB065_Cam2_9-23Sep_2016	2016-09-09	18:27:10	Ok	FALSE	Mila	PB	Spring	F6	PB065	-33.1359	18.0039	34	2	2016-09-09	2016-09-23	animal	0	0	NA	NA	guinea fowl	2	guinea fowl	2	Natural	NA	Unknown sex and age	flat	old road	2	NA	NA
I_00013c.JPG		PB065_Cam2_9-23Sep_2016	2016-09-10	09:28:55	Ok	FALSE	Mila	PB	Spring	F6	PB065	-33.1359	18.0039	34	2	2016-09-09	2016-09-23	animal	0	0	NA	NA	guinea fowl	1	guinea fowl	1	Natural	NA	Unknown sex and age	flat	old road	2	NA	NA
I_00013a.JPG		PB065_Cam2_9-23Sep_2016	2016-09-10	09:28:55	Ok	FALSE	Mila	PB	Spring	F6	PB065	-33.1359	18.0039	34	2	2016-09-09	2016-09-23	animal	0	0	NA	NA	guinea fowl	1	guinea fowl	1	Natural	NA	Unknown sex and age	flat	old road	2	NA	NA
I_00016a.JPG		PB065_Cam2_9-23Sep_2016	2016-09-10	12:06:54	Ok	FALSE	Mila	PB	Spring	F6	PB065	-33.1359	18.0039	34	2	2016-09-09	2016-09-23	animal	0	0	NA	NA	guinea fowl	1	guinea fowl	1	Natural	NA	Unknown sex and age	flat	old road	2	NA	NA
I_00016b.JPG		PB065_Cam2_9-23Sep_2016	2016-09-10	12:06:54	Ok	FALSE	Mila	PB	Spring	F6	PB065	-33.1359	18.0039	34	2	2016-09-09	2016-09-23	animal	0	0	NA	NA	guinea fowl	1	guinea fowl	1	Natural	NA	Unknown sex and age	flat	old road	2	NA	NA
I_00016c.JPG		PB065_Cam2_9-23Sep_2016	2016-09-10	12:06:54	Ok	FALSE	Mila	PB	Spring	F6	PB065	-33.1359	18.0039	34	2	2016-09-09	2016-09-23	animal	0	0	NA	NA	guinea fowl	1	guinea fowl	1	Natural	NA	Unknown sex and age	flat	old road	2	NA	NA
I_00017b.JPG		PB065_Cam2_9-23Sep_2016	2016-09-10	12:13:04	Ok	FALSE	Mila	PB	Spring	F6	PB065	-33.1359	18.0039	34	2	2016-09-09	2016-09-23	animal	0	0	NA	NA	guinea fowl	1	guinea fowl	1	Natural	NA	Unknown sex and age	flat	old road	2	NA	NA
I_00018a.JPG		PB065_Cam2_9-23Sep_2016	2016-09-10	12:16:35	Ok	FALSE	Mila	PB	Spring	F6	PB065	-33.1359	18.0039	34	2	2016-09-09	2016-09-23	animal	0	0	NA	NA	guinea fowl	1	guinea fowl	1	Natural	NA	Unknown sex and age	flat	old road	2	NA	NA
I_00018b.JPG		PB065_Cam2_9-23Sep_2016	2016-09-10	12:16:35	Ok	FALSE	Mila	PB	Spring	F6	PB065	-33.1359	18.0039	34	2	2016-09-09	2016-09-23	animal	0	0	NA	NA	guinea fowl	1	guinea fowl	1	Natural	NA	Unknown sex and age	flat	old road	2	NA	NA
I_00019a.JPG		PB065_Cam2_9-23Sep_2016	2016-09-10	12:24:08	Ok	FALSE	Mila	PB	Spring	F6	PB065	-33.1359	18.0039	34	2	2016-09-09	2016-09-23	animal	0	0	NA	NA	guinea fowl	1	guinea fowl	1	Natural	NA	Unknown sex and age	flat	old road	2	NA	NA
I_00019b.JPG		PB065_Cam2_9-23Sep_2016	2016-09-10	12:24:08	Ok	FALSE	Mila	PB	Spring	F6	PB065	-33.1359	18.0039	34	2	2016-09-09	2016-09-23	animal	0	0	NA	NA	guinea fowl	1	guinea fowl	1	Natural	NA	Unknown sex and age	flat	old road	2	NA	NA
I_00020a.JPG		PB065_Cam2_9-23Sep_2016	2016-09-10	12:39:44	Ok	FALSE	Mila	PB	Spring	F6	PB065	-33.1359	18.0039	34	2	2016-09-09	2016-09-23	animal	0	0	NA	NA	guinea fowl	1	guinea fowl	1	Natural	NA	Unknown sex and age	flat	old road	2	NA	NA
I_00020c.JPG		PB065_Cam2_9-23Sep_2016	2016-09-10	12:39:44	Ok	FALSE	Mila	PB	Spring	F6	PB065	-33.1359	18.0039	34	2	2016-09-09	2016-09-23	animal	0	0	NA	NA	guinea fowl	1	guinea fowl	1	Natural	NA	Unknown sex and age	flat	old road	2	NA	NA
I_00020b.JPG		PB065_Cam2_9-23Sep_2016	2016-09-10	12:39:44	Ok	FALSE	Mila	PB	Spring	F6	PB065	-33.1359	18.0039	34	2	2016-09-09	2016-09-23	animal	0	0	NA	NA	guinea fowl	2	guinea fowl	2	Natural	NA	Unknown sex and age	flat	old road	2	NA	NA
I_00021a.JPG		PB065_Cam2_9-23Sep_2016	2016-09-10	12:44:13	Ok	FALSE	Mila	PB	Spring	F6	PB065	-33.1359	18.0039	34	2	2016-09-09	2016-09-23	animal	0	0	NA	NA	guinea fowl	2	guinea fowl	2	Natural	NA	Unknown sex and age	flat	old road	2	NA	NA
I_00021b.JPG		PB065_Cam2_9-23Sep_2016	2016-09-10	12:44:13	Ok	FALSE	Mila	PB	Spring	F6	PB065	-33.1359	18.0039	34	2	2016-09-09	2016-09-23	animal	0	0	NA	NA	guinea fowl	2	guinea fowl	2	Natural	NA	Unknown sex and age	flat	old road	2	NA	NA
I_00021c.JPG		PB065_Cam2_9-23Sep_2016	2016-09-10	12:44:13	Ok	FALSE	Mila	PB	Spring	F6	PB065	-33.1359	18.0039	34	2	2016-09-09	2016-09-23	animal	0	0	NA	NA	guinea fowl	2	guinea fowl	2	Natural	NA	Unknown sex and age	flat	old road	2	NA	NA
I_00022a.JPG		PB065_Cam2_9-23Sep_2016	2016-09-10	12:50:40	Ok	FALSE	Mila	PB	Spring	F6	PB065	-33.1359	18.0039	34	2	2016-09-09	2016-09-23	animal	0	0	NA	NA	guinea fowl	1	guinea fowl	1	Natural	NA	Unknown sex and age	flat	old road	2	NA	NA
I_00022b.JPG		PB065_Cam2_9-23Sep_2016	2016-09-10	12:50:40	Ok	FALSE	Mila	PB	Spring	F6	PB065	-33.1359	18.0039	34	2	2016-09-09	2016-09-23	animal	0	0	NA	NA	guinea fowl	2	guinea fowl	2	Natural	NA	Unknown sex and age	flat	old road	2	NA	NA
I_00022c.JPG		PB065_Cam2_9-23Sep_2016	2016-09-10	12:50:40	Ok	FALSE	Mila	PB	Spring	F6	PB065	-33.1359	18.0039	34	2	2016-09-09	2016-09-23	animal	0	0	NA	NA	guinea fowl	2	guinea fowl	2	Natural	NA	Unknown sex and age	flat	old road	2	NA	NA
I_00023c.JPG		PB065_Cam2_9-23Sep_2016	2016-09-10	12:52:42	Ok	FALSE	Mila	PB	Spring	F6	PB065	-33.1359	18.0039	34	2	2016-09-09	2016-09-23	animal	0	0	NA	NA	guinea fowl	1	guinea fowl	1	Natural	NA	Unknown sex and age	flat	old road	2	NA	NA
I_00023a.JPG		PB065_Cam2_9-23Sep_2016	2016-09-10	12:52:42	Ok	FALSE	Mila	PB	Spring	F6	PB065	-33.1359	18.0039	34	2	2016-09-09	2016-09-23	animal	0	0	NA	NA	guinea fowl	2	guinea fowl	2	Natural	NA	Unknown sex and age	flat	old road	2	NA	NA
I_00023b.JPG		PB065_Cam2_9-23Sep_2016	2016-09-10	12:52:42	Ok	FALSE	Mila	PB	Spring	F6	PB065	-33.1359	18.0039	34	2	2016-09-09	2016-09-23	animal	0	0	NA	NA	guinea fowl	2	guinea fowl	2	Natural	NA	Unknown sex and age	flat	old road	2	NA	NA
I_00024a.JPG		PB065_Cam2_9-23Sep_2016	2016-09-10	13:29:18	Ok	FALSE	Mila	PB	Spring	F6	PB065	-33.1359	18.0039	34	2	2016-09-09	2016-09-23	animal	0	0	NA	NA	guinea fowl	2	guinea fowl	2	Natural	NA	Unknown sex and age, unknown species	flat	old road	2	NA	NA
I_00048a.JPG		PB065_Cam2_9-23Sep_2016	2016-09-11	16:57:01	Ok	FALSE	Mila	PB	Spring	F6	PB065	-33.1359	18.0039	34	2	2016-09-09	2016-09-23	animal	0	0	NA	NA	guinea fowl	1	guinea fowl	1	Natural	NA	Unknown sex and age	flat	old road	2	NA	NA
I_00048b.JPG		PB065_Cam2_9-23Sep_2016	2016-09-11	16:57:01	Ok	FALSE	Mila	PB	Spring	F6	PB065	-33.1359	18.0039	34	2	2016-09-09	2016-09-23	animal	0	0	NA	NA	guinea fowl	1	guinea fowl	1	Natural	NA	Unknown sex and age	flat	old road	2	NA	NA
I_00048c.JPG		PB065_Cam2_9-23Sep_2016	2016-09-11	16:57:01	Ok	FALSE	Mila	PB	Spring	F6	PB065	-33.1359	18.0039	34	2	2016-09-09	2016-09-23	animal	0	0	NA	NA	guinea fowl	1	guinea fowl	1	Natural	NA	Unknown sex and age	flat	old road	2	NA	NA
I_00049b.JPG		PB065_Cam2_9-23Sep_2016	2016-09-12	10:19:00	Ok	FALSE	Mila	PB	Spring	F6	PB065	-33.1359	18.0039	34	2	2016-09-09	2016-09-23	animal	0	0	NA	NA	guinea fowl	1	guinea fowl	1	Natural	NA	Unknown sex and age	flat	old road	2	NA	NA
I_00065a.JPG		PB065_Cam2_9-23Sep_2016	2016-09-13	18:19:37	Ok	FALSE	Mila	PB	Spring	F6	PB065	-33.1359	18.0039	34	2	2016-09-09	2016-09-23	animal	0	0	NA	NA	guinea fowl	1	guinea fowl	1	Natural	NA	Unknown sex and age	flat	old road	2	NA	NA
I_00075b.JPG		PB065_Cam2_9-23Sep_2016	2016-09-14	09:52:44	Ok	FALSE	Mila	PB	Spring	F6	PB065	-33.1359	18.0039	34	2	2016-09-09	2016-09-23	animal	0	0	NA	NA	guinea fowl	1	guinea fowl	1	Natural	NA	Unknown sex and age	flat	old road	2	NA	NA
I_00085a.JPG		PB065_Cam2_9-23Sep_2016	2016-09-14	11:42:16	Ok	FALSE	Mila	PB	Spring	F6	PB065	-33.1359	18.0039	34	2	2016-09-09	2016-09-23	animal	0	0	NA	NA	guinea fowl	1	guinea fowl	1	Natural	NA	Unknown age and sex	flat	old road	2	NA	NA
I_00085b.JPG		PB065_Cam2_9-23Sep_2016	2016-09-14	11:42:16	Ok	FALSE	Mila	PB	Spring	F6	PB065	-33.1359	18.0039	34	2	2016-09-09	2016-09-23	animal	0	0	NA	NA	guinea fowl	1	guinea fowl	1	Natural	NA	Unknown age and sex	flat	old road	2	NA	NA
I_00085c.JPG		PB065_Cam2_9-23Sep_2016	2016-09-14	11:42:16	Ok	FALSE	Mila	PB	Spring	F6	PB065	-33.1359	18.0039	34	2	2016-09-09	2016-09-23	animal	0	0	NA	NA	guinea fowl	1	guinea fowl	1	Natural	NA	Unknown age and sex	flat	old road	2	NA	NA
I_00098a.JPG		PB065_Cam2_9-23Sep_2016	2016-09-15	15:51:42	Ok	FALSE	Mila	PB	Spring	F6	PB065	-33.1359	18.0039	34	2	2016-09-09	2016-09-23	animal	0	0	NA	NA	guinea fowl	1	guinea fowl	1	Natural	NA	Unknown age and sex	flat	old road	2	NA	NA
I_00098b.JPG		PB065_Cam2_9-23Sep_2016	2016-09-15	15:51:42	Ok	FALSE	Mila	PB	Spring	F6	PB065	-33.1359	18.0039	34	2	2016-09-09	2016-09-23	animal	0	0	NA	NA	guinea fowl	1	guinea fowl	1	Natural	NA	Unknown age and sex	flat	old road	2	NA	NA
I_00123a.JPG		PB065_Cam2_9-23Sep_2016	2016-09-17	16:42:30	Ok	FALSE	Mila	PB	Spring	F6	PB065	-33.1359	18.0039	34	2	2016-09-09	2016-09-23	animal	0	0	NA	NA	guinea fowl	2	guinea fowl	2	Natural	NA	Unknown age and sex	flat	old road	2	NA	NA
I_00127b.JPG		PB065_Cam2_9-23Sep_2016	2016-09-18	09:11:52	Ok	FALSE	Mila	PB	Spring	F6	PB065	-33.1359	18.0039	34	2	2016-09-09	2016-09-23	animal	0	0	NA	NA	guinea fowl	1	guinea fowl	1	Natural	NA	Unknown age and sex	flat	old road	2	NA	NA
I_00128a.JPG		PB065_Cam2_9-23Sep_2016	2016-09-18	10:47:30	Ok	FALSE	Mila	PB	Spring	F6	PB065	-33.1359	18.0039	34	2	2016-09-09	2016-09-23	animal	0	0	NA	NA	guinea fowl	1	guinea fowl	1	Natural	NA	Unknown age and sex	flat	old road	2	NA	NA
I_00129a.JPG		PB065_Cam2_9-23Sep_2016	2016-09-18	11:51:37	Ok	FALSE	Mila	PB	Spring	F6	PB065	-33.1359	18.0039	34	2	2016-09-09	2016-09-23	animal	0	0	NA	NA	guinea fowl	1	guinea fowl	1	Natural	NA	Unknown age and sex	flat	old road	2	NA	NA
I_00129b.JPG		PB065_Cam2_9-23Sep_2016	2016-09-18	11:51:37	Ok	FALSE	Mila	PB	Spring	F6	PB065	-33.1359	18.0039	34	2	2016-09-09	2016-09-23	animal	0	0	NA	NA	guinea fowl	1	guinea fowl	1	Natural	NA	Unknown age and sex	flat	old road	2	NA	NA
I_00129c.JPG		PB065_Cam2_9-23Sep_2016	2016-09-18	11:51:37	Ok	FALSE	Mila	PB	Spring	F6	PB065	-33.1359	18.0039	34	2	2016-09-09	2016-09-23	animal	0	0	NA	NA	guinea fowl	1	guinea fowl	1	Natural	NA	Unknown age and sex	flat	old road	2	NA	NA
I_00134a.JPG		PB065_Cam2_9-23Sep_2016	2016-09-18	17:42:59	Ok	FALSE	Mila	PB	Spring	F6	PB065	-33.1359	18.0039	34	2	2016-09-09	2016-09-23	animal	0	0	NA	NA	guinea fowl	1	guinea fowl	1	Natural	NA	Unknown age and sex	flat	old road	2	NA	NA
I_00134b.JPG		PB065_Cam2_9-23Sep_2016	2016-09-18	17:42:59	Ok	FALSE	Mila	PB	Spring	F6	PB065	-33.1359	18.0039	34	2	2016-09-09	2016-09-23	animal	0	0	NA	NA	guinea fowl	1	guinea fowl	1	Natural	NA	Unknown age and sex	flat	old road	2	NA	NA
I_00134c.JPG		PB065_Cam2_9-23Sep_2016	2016-09-18	17:42:59	Ok	FALSE	Mila	PB	Spring	F6	PB065	-33.1359	18.0039	34	2	2016-09-09	2016-09-23	animal	0	0	NA	NA	guinea fowl	1	guinea fowl	1	Natural	NA	Unknown age and sex	flat	old road	2	NA	NA
I_00135a.JPG		PB065_Cam2_9-23Sep_2016	2016-09-18	17:43:37	Ok	FALSE	Mila	PB	Spring	F6	PB065	-33.1359	18.0039	34	2	2016-09-09	2016-09-23	animal	0	0	NA	NA	guinea fowl	1	guinea fowl	1	Natural	NA	Unknown age and sex	flat	old road	2	NA	NA
I_00135b.JPG		PB065_Cam2_9-23Sep_2016	2016-09-18	17:43:37	Ok	FALSE	Mila	PB	Spring	F6	PB065	-33.1359	18.0039	34	2	2016-09-09	2016-09-23	animal	0	0	NA	NA	guinea fowl	1	guinea fowl	1	Natural	NA	Unknown age and sex	flat	old road	2	NA	NA
I_00135c.JPG		PB065_Cam2_9-23Sep_2016	2016-09-18	17:43:37	Ok	FALSE	Mila	PB	Spring	F6	PB065	-33.1359	18.0039	34	2	2016-09-09	2016-09-23	animal	0	0	NA	NA	guinea fowl	1	guinea fowl	1	Natural	NA	Unknown age and sex	flat	old road	2	NA	NA
I_00136a.JPG		PB065_Cam2_9-23Sep_2016	2016-09-18	17:44:04	Ok	FALSE	Mila	PB	Spring	F6	PB065	-33.1359	18.0039	34	2	2016-09-09	2016-09-23	animal	0	0	NA	NA	guinea fowl	1	guinea fowl	1	Natural	NA	1 guinea fowl, 3 sacred ibis	flat	old road	2	NA	NA
I_00136b.JPG		PB065_Cam2_9-23Sep_2016	2016-09-18	17:44:04	Ok	FALSE	Mila	PB	Spring	F6	PB065	-33.1359	18.0039	34	2	2016-09-09	2016-09-23	animal	0	0	NA	NA	guinea fowl	1	guinea fowl	1	Natural	NA	1 guinea fowl, 3 sacred ibis	flat	old road	2	NA	NA
I_00136c.JPG		PB065_Cam2_9-23Sep_2016	2016-09-18	17:44:04	Ok	FALSE	Mila	PB	Spring	F6	PB065	-33.1359	18.0039	34	2	2016-09-09	2016-09-23	animal	0	0	NA	NA	guinea fowl	1	guinea fowl	1	Natural	NA	1 guinea fowl, 3 sacred ibis	flat	old road	2	NA	NA
I_00137c.JPG		PB065_Cam2_9-23Sep_2016	2016-09-18	17:44:44	Ok	FALSE	Mila	PB	Spring	F6	PB065	-33.1359	18.0039	34	2	2016-09-09	2016-09-23	animal	0	0	NA	NA	guinea fowl	1	guinea fowl	1	Natural	NA	Unknown age and sex	flat	old road	2	NA	NA
I_00137a.JPG		PB065_Cam2_9-23Sep_2016	2016-09-18	17:44:44	Ok	FALSE	Mila	PB	Spring	F6	PB065	-33.1359	18.0039	34	2	2016-09-09	2016-09-23	animal	0	0	NA	NA	guinea fowl	1	guinea fowl	1	Natural	NA	1 guinea fowl, sacred ibis	flat	old road	2	NA	NA
I_00137b.JPG		PB065_Cam2_9-23Sep_2016	2016-09-18	17:44:44	Ok	FALSE	Mila	PB	Spring	F6	PB065	-33.1359	18.0039	34	2	2016-09-09	2016-09-23	animal	0	0	NA	NA	guinea fowl	1	guinea fowl	1	Natural	NA	1 guinea fowl, 1 sacred ibis	flat	old road	2	NA	NA
I_00149b.JPG		PB065_Cam2_9-23Sep_2016	2016-09-19	09:14:04	Ok	FALSE	Mila	PB	Spring	F6	PB065	-33.1359	18.0039	34	2	2016-09-09	2016-09-23	animal	0	0	NA	NA	guinea fowl	1	guinea fowl	1	Natural	NA	Unknown age and sex	flat	old road	2	NA	NA
I_00149a.JPG		PB065_Cam2_9-23Sep_2016	2016-09-19	09:14:04	Ok	FALSE	Mila	PB	Spring	F6	PB065	-33.1359	18.0039	34	2	2016-09-09	2016-09-23	animal	0	0	NA	NA	guinea fowl	1	guinea fowl	1	Natural	NA	Unknown age and sex	flat	old road	2	NA	NA
I_00150b.JPG		PB065_Cam2_9-23Sep_2016	2016-09-19	10:47:09	Ok	FALSE	Mila	PB	Spring	F6	PB065	-33.1359	18.0039	34	2	2016-09-09	2016-09-23	animal	0	0	NA	NA	guinea fowl	1	guinea fowl	1	Natural	NA	Unknown age and sex	flat	old road	2	NA	NA
I_00162b.JPG		PB065_Cam2_9-23Sep_2016	2016-09-20	07:57:37	Ok	FALSE	Mila	PB	Spring	F6	PB065	-33.1359	18.0039	34	2	2016-09-09	2016-09-23	animal	0	0	NA	NA	guinea fowl	1	guinea fowl	1	Natural	NA	Unknown age and sex	flat	old road	2	NA	NA
I_00162c.JPG		PB065_Cam2_9-23Sep_2016	2016-09-20	07:57:37	Ok	FALSE	Mila	PB	Spring	F6	PB065	-33.1359	18.0039	34	2	2016-09-09	2016-09-23	animal	0	0	NA	NA	guinea fowl	1	guinea fowl	1	Natural	NA	Unknown age and sex	flat	old road	2	NA	NA
I_00166b.JPG		PB065_Cam2_9-23Sep_2016	2016-09-20	12:43:00	Ok	FALSE	Mila	PB	Spring	F6	PB065	-33.1359	18.0039	34	2	2016-09-09	2016-09-23	animal	0	0	NA	NA	guinea fowl	1	guinea fowl	1	Natural	NA	Unknown age and sex	flat	old road	2	NA	NA
I_00166a.JPG		PB065_Cam2_9-23Sep_2016	2016-09-20	12:43:00	Ok	FALSE	Mila	PB	Spring	F6	PB065	-33.1359	18.0039	34	2	2016-09-09	2016-09-23	animal	0	0	NA	NA	guinea fowl	1	guinea fowl	1	Natural	NA	Unknown age and sex	flat	old road	2	NA	NA
I_00170a.JPG		PB065_Cam2_9-23Sep_2016	2016-09-21	15:02:58	Ok	FALSE	Mila	PB	Spring	F6	PB065	-33.1359	18.0039	34	2	2016-09-09	2016-09-23	animal	0	0	NA	NA	guinea fowl	1	guinea fowl	1	Natural	NA	Unknown age and sex	flat	old road	2	NA	NA
I_00170b.JPG		PB065_Cam2_9-23Sep_2016	2016-09-21	15:02:58	Ok	FALSE	Mila	PB	Spring	F6	PB065	-33.1359	18.0039	34	2	2016-09-09	2016-09-23	animal	0	0	NA	NA	guinea fowl	1	guinea fowl	1	Natural	NA	Unknown age and sex	flat	old road	2	NA	NA
I_00170c.JPG		PB065_Cam2_9-23Sep_2016	2016-09-21	15:02:58	Ok	FALSE	Mila	PB	Spring	F6	PB065	-33.1359	18.0039	34	2	2016-09-09	2016-09-23	animal	0	0	NA	NA	guinea fowl	1	guinea fowl	1	Natural	NA	Unknown age and sex	flat	old road	2	NA	NA
I_00175b.JPG		PB065_Cam2_9-23Sep_2016	2016-09-22	13:33:34	Ok	FALSE	Mila	PB	Spring	F6	PB065	-33.1359	18.0039	34	2	2016-09-09	2016-09-23	animal	0	0	NA	NA	guinea fowl	1	guinea fowl	1	Natural	NA	Unknown age and sex	flat	old road	2	NA	NA
I_00002a.JPG		PB065_Cam2_9-23Sep_2016	2016-09-09	14:56:38	Ok	FALSE	Mila	PB	Spring	F6	PB065	-33.1359	18.0039	34	2	2016-09-09	2016-09-23	animal	0	0	NA	NA	kelp gull	1	kelp gull	1	Natural	NA	Unknown age and sex	flat	old road	2	NA	NA
I_00002b.JPG		PB065_Cam2_9-23Sep_2016	2016-09-09	14:56:38	Ok	FALSE	Mila	PB	Spring	F6	PB065	-33.1359	18.0039	34	2	2016-09-09	2016-09-23	animal	0	0	NA	NA	kelp gull	1	kelp gull	1	Natural	NA	Unknown age and sex	flat	old road	2	NA	NA
I_00002c.JPG		PB065_Cam2_9-23Sep_2016	2016-09-09	14:56:38	Ok	FALSE	Mila	PB	Spring	F6	PB065	-33.1359	18.0039	34	2	2016-09-09	2016-09-23	animal	0	0	NA	NA	kelp gull	1	kelp gull	1	Natural	NA	Unknown age and sex	flat	old road	2	NA	NA
I_00003c.JPG		PB065_Cam2_9-23Sep_2016	2016-09-09	14:59:21	Ok	FALSE	Mila	PB	Spring	F6	PB065	-33.1359	18.0039	34	2	2016-09-09	2016-09-23	animal	0	0	NA	NA	kelp gull	1	kelp gull	1	Natural	NA	Unknown age and sex	flat	old road	2	NA	NA
I_00003a.JPG		PB065_Cam2_9-23Sep_2016	2016-09-09	14:59:21	Ok	FALSE	Mila	PB	Spring	F6	PB065	-33.1359	18.0039	34	2	2016-09-09	2016-09-23	animal	0	0	NA	NA	kelp gull	1	kelp gull	1	Natural	NA	Unknown age and sex	flat	old road	2	NA	NA
I_00003b.JPG		PB065_Cam2_9-23Sep_2016	2016-09-09	14:59:21	Ok	FALSE	Mila	PB	Spring	F6	PB065	-33.1359	18.0039	34	2	2016-09-09	2016-09-23	animal	0	0	NA	NA	kelp gull	2	kelp gull	2	Natural	NA	Unknown age and sex	flat	old road	2	NA	NA
I_00006a.JPG		PB065_Cam2_9-23Sep_2016	2016-09-09	15:28:48	Ok	FALSE	Mila	PB	Spring	F6	PB065	-33.1359	18.0039	34	2	2016-09-09	2016-09-23	animal	0	0	NA	NA	kelp gull	1	kelp gull	1	Natural	NA	Unknown sex and age	flat	old road	2	NA	NA
I_00006c.JPG		PB065_Cam2_9-23Sep_2016	2016-09-09	15:28:48	Ok	FALSE	Mila	PB	Spring	F6	PB065	-33.1359	18.0039	34	2	2016-09-09	2016-09-23	animal	0	0	NA	NA	kelp gull	1	kelp gull	1	Natural	NA	Unknown sex and age	flat	old road	2	NA	NA
I_00023b.JPG		PB065_Cam2_9-23Sep_2016	2016-09-10	12:52:42	Ok	FALSE	Mila	PB	Spring	F6	PB065	-33.1359	18.0039	34	2	2016-09-09	2016-09-23	animal	0	0	NA	NA	kelp gull	1	kelp gull	1	Natural	NA	Unknown sex and age	flat	old road	2	NA	NA
I_00023c.JPG		PB065_Cam2_9-23Sep_2016	2016-09-10	12:52:42	Ok	FALSE	Mila	PB	Spring	F6	PB065	-33.1359	18.0039	34	2	2016-09-09	2016-09-23	animal	0	0	NA	NA	kelp gull	1	kelp gull	1	Natural	NA	Unknown sex and age	flat	old road	2	NA	NA
I_00053a.JPG		PB065_Cam2_9-23Sep_2016	2016-09-12	13:39:19	Ok	FALSE	Mila	PB	Spring	F6	PB065	-33.1359	18.0039	34	2	2016-09-09	2016-09-23	animal	0	0	NA	NA	kudu	1	kudu	1	Natural	NA	NA	flat	old road	2	NA	adult female
I_00053b.JPG		PB065_Cam2_9-23Sep_2016	2016-09-12	13:39:19	Ok	FALSE	Mila	PB	Spring	F6	PB065	-33.1359	18.0039	34	2	2016-09-09	2016-09-23	animal	0	0	NA	NA	kudu	1	kudu	1	Natural	NA	NA	flat	old road	2	NA	adult female
I_00053c.JPG		PB065_Cam2_9-23Sep_2016	2016-09-12	13:39:19	Ok	FALSE	Mila	PB	Spring	F6	PB065	-33.1359	18.0039	34	2	2016-09-09	2016-09-23	animal	0	0	NA	NA	kudu	1	kudu	1	Natural	NA	NA	flat	old road	2	NA	adult female
I_00067b.JPG		PB065_Cam2_9-23Sep_2016	2016-09-13	23:34:34	Ok	FALSE	Mila	PB	Spring	F6	PB065	-33.1359	18.0039	34	2	2016-09-09	2016-09-23	animal	0	0	NA	NA	kudu	1	kudu	1	Natural	NA	Species unknown	flat	old road	2	NA	NA
I_00067a.JPG		PB065_Cam2_9-23Sep_2016	2016-09-13	23:34:34	Ok	FALSE	Mila	PB	Spring	F6	PB065	-33.1359	18.0039	34	2	2016-09-09	2016-09-23	animal	0	0	NA	NA	kudu	1	kudu	1	Natural	NA	Species unknown	flat	old road	2	NA	NA
I_00068a.JPG		PB065_Cam2_9-23Sep_2016	2016-09-14	00:21:46	Ok	FALSE	Mila	PB	Spring	F6	PB065	-33.1359	18.0039	34	2	2016-09-09	2016-09-23	animal	0	0	NA	NA	kudu	1	kudu	1	Natural	NA	1 A U	flat	old road	2	NA	NA
I_00068b.JPG		PB065_Cam2_9-23Sep_2016	2016-09-14	00:21:46	Ok	FALSE	Mila	PB	Spring	F6	PB065	-33.1359	18.0039	34	2	2016-09-09	2016-09-23	animal	0	0	NA	NA	kudu	1	kudu	1	Natural	NA	1 A U	flat	old road	2	NA	NA
I_00068c.JPG		PB065_Cam2_9-23Sep_2016	2016-09-14	00:21:46	Ok	FALSE	Mila	PB	Spring	F6	PB065	-33.1359	18.0039	34	2	2016-09-09	2016-09-23	animal	0	0	NA	NA	kudu	1	kudu	1	Natural	NA	1 A U	flat	old road	2	NA	NA
I_00069a.JPG		PB065_Cam2_9-23Sep_2016	2016-09-14	00:22:10	Ok	FALSE	Mila	PB	Spring	F6	PB065	-33.1359	18.0039	34	2	2016-09-09	2016-09-23	animal	0	0	NA	NA	kudu	1	kudu	1	Natural	NA	1 A U	flat	old road	2	NA	NA
I_00069b.JPG		PB065_Cam2_9-23Sep_2016	2016-09-14	00:22:10	Ok	FALSE	Mila	PB	Spring	F6	PB065	-33.1359	18.0039	34	2	2016-09-09	2016-09-23	animal	0	0	NA	NA	kudu	1	kudu	1	Natural	NA	1 A U	flat	old road	2	NA	NA
I_00070a.JPG		PB065_Cam2_9-23Sep_2016	2016-09-14	00:22:34	Ok	FALSE	Mila	PB	Spring	F6	PB065	-33.1359	18.0039	34	2	2016-09-09	2016-09-23	animal	0	0	NA	NA	kudu	1	kudu	1	Natural	NA	1 A U	flat	old road	2	NA	NA
I_00070b.JPG		PB065_Cam2_9-23Sep_2016	2016-09-14	00:22:34	Ok	FALSE	Mila	PB	Spring	F6	PB065	-33.1359	18.0039	34	2	2016-09-09	2016-09-23	animal	0	0	NA	NA	kudu	1	kudu	1	Natural	NA	1 A U	flat	old road	2	NA	NA
I_00071a.JPG		PB065_Cam2_9-23Sep_2016	2016-09-14	00:23:13	Ok	FALSE	Mila	PB	Spring	F6	PB065	-33.1359	18.0039	34	2	2016-09-09	2016-09-23	animal	0	0	NA	NA	kudu	1	kudu	1	Natural	NA	1 A U	flat	old road	2	NA	NA
I_00071b.JPG		PB065_Cam2_9-23Sep_2016	2016-09-14	00:23:13	Ok	FALSE	Mila	PB	Spring	F6	PB065	-33.1359	18.0039	34	2	2016-09-09	2016-09-23	animal	0	0	NA	NA	kudu	1	kudu	1	Natural	NA	1 A U	flat	old road	2	NA	NA
I_00071c.JPG		PB065_Cam2_9-23Sep_2016	2016-09-14	00:23:13	Ok	FALSE	Mila	PB	Spring	F6	PB065	-33.1359	18.0039	34	2	2016-09-09	2016-09-23	animal	0	0	NA	NA	kudu	1	kudu	1	Natural	NA	1 A U	flat	old road	2	NA	NA
I_00072b.JPG		PB065_Cam2_9-23Sep_2016	2016-09-14	00:25:01	Ok	FALSE	Mila	PB	Spring	F6	PB065	-33.1359	18.0039	34	2	2016-09-09	2016-09-23	animal	0	0	NA	NA	kudu	1	kudu	1	Natural	NA	NA	flat	old road	2	NA	adult female
I_00072a.JPG		PB065_Cam2_9-23Sep_2016	2016-09-14	00:25:01	Ok	FALSE	Mila	PB	Spring	F6	PB065	-33.1359	18.0039	34	2	2016-09-09	2016-09-23	animal	0	0	NA	NA	kudu	1	kudu	1	Natural	NA	NA	flat	old road	2	NA	adult female
I_00073a.JPG		PB065_Cam2_9-23Sep_2016	2016-09-14	00:25:25	Ok	FALSE	Mila	PB	Spring	F6	PB065	-33.1359	18.0039	34	2	2016-09-09	2016-09-23	animal	0	0	NA	NA	kudu	1	kudu	1	Natural	NA	1 A U	flat	old road	2	NA	NA
I_00073b.JPG		PB065_Cam2_9-23Sep_2016	2016-09-14	00:25:25	Ok	FALSE	Mila	PB	Spring	F6	PB065	-33.1359	18.0039	34	2	2016-09-09	2016-09-23	animal	0	0	NA	NA	kudu	1	kudu	1	Natural	NA	1 A U	flat	old road	2	NA	NA
I_00078c.JPG		PB065_Cam2_9-23Sep_2016	2016-09-14	11:27:41	Ok	FALSE	Mila	PB	Spring	F6	PB065	-33.1359	18.0039	34	2	2016-09-09	2016-09-23	animal	0	0	NA	NA	kudu	1	kudu	1	Natural	NA	3 cattle egret	flat	old road	2	NA	adult female
I_00078a.JPG		PB065_Cam2_9-23Sep_2016	2016-09-14	11:27:41	Ok	FALSE	Mila	PB	Spring	F6	PB065	-33.1359	18.0039	34	2	2016-09-09	2016-09-23	animal	0	0	NA	NA	kudu	1	kudu	1	Natural	NA	4 cattle egret	flat	old road	2	NA	adult female
I_00078b.JPG		PB065_Cam2_9-23Sep_2016	2016-09-14	11:27:41	Ok	FALSE	Mila	PB	Spring	F6	PB065	-33.1359	18.0039	34	2	2016-09-09	2016-09-23	animal	0	0	NA	NA	kudu	1	kudu	1	Natural	NA	5 cattle egret	flat	old road	2	NA	adult female
I_00079a.JPG		PB065_Cam2_9-23Sep_2016	2016-09-14	11:28:38	Ok	FALSE	Mila	PB	Spring	F6	PB065	-33.1359	18.0039	34	2	2016-09-09	2016-09-23	animal	0	0	NA	NA	kudu	1	kudu	1	Natural	NA	cattle egret	flat	old road	2	NA	adult female
I_00079b.JPG		PB065_Cam2_9-23Sep_2016	2016-09-14	11:28:38	Ok	FALSE	Mila	PB	Spring	F6	PB065	-33.1359	18.0039	34	2	2016-09-09	2016-09-23	animal	0	0	NA	NA	kudu	1	kudu	1	Natural	NA	cattle egret	flat	old road	2	NA	adult female
I_00079c.JPG		PB065_Cam2_9-23Sep_2016	2016-09-14	11:28:38	Ok	FALSE	Mila	PB	Spring	F6	PB065	-33.1359	18.0039	34	2	2016-09-09	2016-09-23	animal	0	0	NA	NA	kudu	1	kudu	1	Natural	NA	cattle egret	flat	old road	2	NA	adult female
I_00080b.JPG		PB065_Cam2_9-23Sep_2016	2016-09-14	11:29:11	Ok	FALSE	Mila	PB	Spring	F6	PB065	-33.1359	18.0039	34	2	2016-09-09	2016-09-23	animal	0	0	NA	NA	kudu	1	kudu	1	Natural	NA	NA	flat	old road	2	NA	adult female
I_00080c.JPG		PB065_Cam2_9-23Sep_2016	2016-09-14	11:29:11	Ok	FALSE	Mila	PB	Spring	F6	PB065	-33.1359	18.0039	34	2	2016-09-09	2016-09-23	animal	0	0	NA	NA	kudu	1	kudu	1	Natural	NA	1 cattle egret	flat	old road	2	NA	adult female
I_00081c.JPG		PB065_Cam2_9-23Sep_2016	2016-09-14	11:29:37	Ok	FALSE	Mila	PB	Spring	F6	PB065	-33.1359	18.0039	34	2	2016-09-09	2016-09-23	animal	0	0	NA	NA	kudu	1	kudu	1	Natural	NA	1 cattle egret	flat	old road	2	NA	adult female
I_00081b.JPG		PB065_Cam2_9-23Sep_2016	2016-09-14	11:29:37	Ok	FALSE	Mila	PB	Spring	F6	PB065	-33.1359	18.0039	34	2	2016-09-09	2016-09-23	animal	0	0	NA	NA	kudu	1	kudu	1	Natural	NA	NA	flat	old road	2	NA	adult female
I_00081a.JPG		PB065_Cam2_9-23Sep_2016	2016-09-14	11:29:37	Ok	FALSE	Mila	PB	Spring	F6	PB065	-33.1359	18.0039	34	2	2016-09-09	2016-09-23	animal	0	0	NA	NA	kudu	1	kudu	1	Natural	NA	1 cattle egret	flat	old road	2	NA	adult female
I_00082a.JPG		PB065_Cam2_9-23Sep_2016	2016-09-14	11:30:02	Ok	FALSE	Mila	PB	Spring	F6	PB065	-33.1359	18.0039	34	2	2016-09-09	2016-09-23	animal	0	0	NA	NA	kudu	1	kudu	1	Natural	NA	cattle egret	flat	old road	2	NA	adult female
I_00082b.JPG		PB065_Cam2_9-23Sep_2016	2016-09-14	11:30:02	Ok	FALSE	Mila	PB	Spring	F6	PB065	-33.1359	18.0039	34	2	2016-09-09	2016-09-23	animal	0	0	NA	NA	kudu	1	kudu	1	Natural	NA	cattle egret	flat	old road	2	NA	adult female
I_00082c.JPG		PB065_Cam2_9-23Sep_2016	2016-09-14	11:30:02	Ok	FALSE	Mila	PB	Spring	F6	PB065	-33.1359	18.0039	34	2	2016-09-09	2016-09-23	animal	0	0	NA	NA	kudu	1	kudu	1	Natural	NA	cattle egret	flat	old road	2	NA	adult female
I_00083a.JPG		PB065_Cam2_9-23Sep_2016	2016-09-14	11:31:22	Ok	FALSE	Mila	PB	Spring	F6	PB065	-33.1359	18.0039	34	2	2016-09-09	2016-09-23	animal	0	0	NA	NA	kudu	1	kudu	1	Natural	NA	NA	flat	old road	2	NA	adult female
I_00083b.JPG		PB065_Cam2_9-23Sep_2016	2016-09-14	11:31:22	Ok	FALSE	Mila	PB	Spring	F6	PB065	-33.1359	18.0039	34	2	2016-09-09	2016-09-23	animal	0	0	NA	NA	kudu	1	kudu	1	Natural	NA	NA	flat	old road	2	NA	adult female
I_00083c.JPG		PB065_Cam2_9-23Sep_2016	2016-09-14	11:31:22	Ok	FALSE	Mila	PB	Spring	F6	PB065	-33.1359	18.0039	34	2	2016-09-09	2016-09-23	animal	0	0	NA	NA	kudu	1	kudu	1	Natural	NA	NA	flat	old road	2	NA	adult female
I_00084a.JPG		PB065_Cam2_9-23Sep_2016	2016-09-14	11:31:47	Ok	FALSE	Mila	PB	Spring	F6	PB065	-33.1359	18.0039	34	2	2016-09-09	2016-09-23	animal	0	0	NA	NA	kudu	1	kudu	1	Natural	NA	1 cattle egret	flat	old road	2	NA	adult female
I_00084b.JPG		PB065_Cam2_9-23Sep_2016	2016-09-14	11:31:47	Ok	FALSE	Mila	PB	Spring	F6	PB065	-33.1359	18.0039	34	2	2016-09-09	2016-09-23	animal	0	0	NA	NA	kudu	1	kudu	1	Natural	NA	1 cattle egret	flat	old road	2	NA	adult female
I_00084c.JPG		PB065_Cam2_9-23Sep_2016	2016-09-14	11:31:47	Ok	FALSE	Mila	PB	Spring	F6	PB065	-33.1359	18.0039	34	2	2016-09-09	2016-09-23	animal	0	0	NA	NA	kudu	1	kudu	1	Natural	NA	1 cattle egret	flat	old road	2	NA	adult female
I_00086a.JPG		PB065_Cam2_9-23Sep_2016	2016-09-14	11:53:12	Ok	FALSE	Mila	PB	Spring	F6	PB065	-33.1359	18.0039	34	2	2016-09-09	2016-09-23	animal	0	0	NA	NA	kudu	1	kudu	1	Natural	NA	NA	flat	old road	2	NA	adult male
I_00086b.JPG		PB065_Cam2_9-23Sep_2016	2016-09-14	11:53:12	Ok	FALSE	Mila	PB	Spring	F6	PB065	-33.1359	18.0039	34	2	2016-09-09	2016-09-23	animal	0	0	NA	NA	kudu	1	kudu	1	Natural	NA	NA	flat	old road	2	NA	adult male
I_00086c.JPG		PB065_Cam2_9-23Sep_2016	2016-09-14	11:53:12	Ok	FALSE	Mila	PB	Spring	F6	PB065	-33.1359	18.0039	34	2	2016-09-09	2016-09-23	animal	0	0	NA	NA	kudu	1	kudu	1	Natural	NA	NA	flat	old road	2	NA	adult male
I_00088c.JPG		PB065_Cam2_9-23Sep_2016	2016-09-14	12:55:20	Ok	FALSE	Mila	PB	Spring	F6	PB065	-33.1359	18.0039	34	2	2016-09-09	2016-09-23	animal	0	0	NA	NA	kudu	1	kudu	1	Natural	NA	NA	flat	old road	2	NA	adult female
I_00088a.JPG		PB065_Cam2_9-23Sep_2016	2016-09-14	12:55:20	Ok	FALSE	Mila	PB	Spring	F6	PB065	-33.1359	18.0039	34	2	2016-09-09	2016-09-23	animal	0	0	NA	NA	kudu	1	kudu	1	Natural	NA	NA	flat	old road	2	NA	adult female
I_00088b.JPG		PB065_Cam2_9-23Sep_2016	2016-09-14	12:55:20	Ok	FALSE	Mila	PB	Spring	F6	PB065	-33.1359	18.0039	34	2	2016-09-09	2016-09-23	animal	0	0	NA	NA	kudu	1	kudu	1	Natural	NA	NA	flat	old road	2	NA	adult female
I_00089a.JPG		PB065_Cam2_9-23Sep_2016	2016-09-14	12:55:52	Ok	FALSE	Mila	PB	Spring	F6	PB065	-33.1359	18.0039	34	2	2016-09-09	2016-09-23	animal	0	0	NA	NA	kudu	1	kudu	1	Natural	NA	NA	flat	old road	2	NA	adult female
I_00089b.JPG		PB065_Cam2_9-23Sep_2016	2016-09-14	12:55:52	Ok	FALSE	Mila	PB	Spring	F6	PB065	-33.1359	18.0039	34	2	2016-09-09	2016-09-23	animal	0	0	NA	NA	kudu	1	kudu	1	Natural	NA	NA	flat	old road	2	NA	adult female
I_00089c.JPG		PB065_Cam2_9-23Sep_2016	2016-09-14	12:55:52	Ok	FALSE	Mila	PB	Spring	F6	PB065	-33.1359	18.0039	34	2	2016-09-09	2016-09-23	animal	0	0	NA	NA	kudu	1	kudu	1	Natural	NA	NA	flat	old road	2	NA	adult female
I_00090b.JPG		PB065_Cam2_9-23Sep_2016	2016-09-14	12:56:23	Ok	FALSE	Mila	PB	Spring	F6	PB065	-33.1359	18.0039	34	2	2016-09-09	2016-09-23	animal	0	0	NA	NA	kudu	1	kudu	1	Natural	NA	NA	flat	old road	2	NA	adult female
I_00090a.JPG		PB065_Cam2_9-23Sep_2016	2016-09-14	12:56:23	Ok	FALSE	Mila	PB	Spring	F6	PB065	-33.1359	18.0039	34	2	2016-09-09	2016-09-23	animal	0	0	NA	NA	kudu	1	kudu	1	Natural	NA	NA	flat	old road	2	NA	adult female
I_00090c.JPG		PB065_Cam2_9-23Sep_2016	2016-09-14	12:56:23	Ok	FALSE	Mila	PB	Spring	F6	PB065	-33.1359	18.0039	34	2	2016-09-09	2016-09-23	animal	0	0	NA	NA	kudu	1	kudu	1	Natural	NA	NA	flat	old road	2	NA	adult female
I_00091a.JPG		PB065_Cam2_9-23Sep_2016	2016-09-14	12:57:00	Ok	FALSE	Mila	PB	Spring	F6	PB065	-33.1359	18.0039	34	2	2016-09-09	2016-09-23	animal	0	0	NA	NA	kudu	1	kudu	1	Natural	NA	NA	flat	old road	2	NA	adult female
I_00091b.JPG		PB065_Cam2_9-23Sep_2016	2016-09-14	12:57:00	Ok	FALSE	Mila	PB	Spring	F6	PB065	-33.1359	18.0039	34	2	2016-09-09	2016-09-23	animal	0	0	NA	NA	kudu	1	kudu	1	Natural	NA	NA	flat	old road	2	NA	adult female
I_00091c.JPG		PB065_Cam2_9-23Sep_2016	2016-09-14	12:57:00	Ok	FALSE	Mila	PB	Spring	F6	PB065	-33.1359	18.0039	34	2	2016-09-09	2016-09-23	animal	0	0	NA	NA	kudu	1	kudu	1	Natural	NA	NA	flat	old road	2	NA	adult female
I_00092c.JPG		PB065_Cam2_9-23Sep_2016	2016-09-14	17:18:02	Ok	FALSE	Mila	PB	Spring	F6	PB065	-33.1359	18.0039	34	2	2016-09-09	2016-09-23	animal	0	0	NA	NA	kudu	4	kudu	4	Natural	NA	2 A F, 2 A U	flat	old road	2	NA	NA
I_00092a.JPG		PB065_Cam2_9-23Sep_2016	2016-09-14	17:18:02	Ok	FALSE	Mila	PB	Spring	F6	PB065	-33.1359	18.0039	34	2	2016-09-09	2016-09-23	animal	0	0	NA	NA	kudu	5	kudu	5	Natural	NA	2 A F, 2 A M, 1 A U	flat	old road	2	NA	NA
I_00092b.JPG		PB065_Cam2_9-23Sep_2016	2016-09-14	17:18:02	Ok	FALSE	Mila	PB	Spring	F6	PB065	-33.1359	18.0039	34	2	2016-09-09	2016-09-23	animal	0	0	NA	NA	kudu	6	kudu	6	Natural	NA	2 A M, 2 A F, 2 A U	flat	old road	2	NA	NA
I_00093c.JPG		PB065_Cam2_9-23Sep_2016	2016-09-14	17:18:28	Ok	FALSE	Mila	PB	Spring	F6	PB065	-33.1359	18.0039	34	2	2016-09-09	2016-09-23	animal	0	0	NA	NA	kudu	1	kudu	1	Natural	NA	NA	flat	old road	2	NA	adult female
I_00093a.JPG		PB065_Cam2_9-23Sep_2016	2016-09-14	17:18:28	Ok	FALSE	Mila	PB	Spring	F6	PB065	-33.1359	18.0039	34	2	2016-09-09	2016-09-23	animal	0	0	NA	NA	kudu	3	kudu	3	Natural	NA	2 A F, 1 A M	flat	old road	2	NA	NA
I_00093b.JPG		PB065_Cam2_9-23Sep_2016	2016-09-14	17:18:28	Ok	FALSE	Mila	PB	Spring	F6	PB065	-33.1359	18.0039	34	2	2016-09-09	2016-09-23	animal	0	0	NA	NA	kudu	3	kudu	3	Natural	NA	1 A F, 1 A M, 1 A U	flat	old road	2	NA	NA
I_00151a.JPG		PB065_Cam2_9-23Sep_2016	2016-09-19	11:51:57	Ok	FALSE	Mila	PB	Spring	F6	PB065	-33.1359	18.0039	34	2	2016-09-09	2016-09-23	animal	0	0	NA	NA	kudu	2	kudu	2	Natural	NA	NA	flat	old road	2	NA	adult female
I_00151b.JPG		PB065_Cam2_9-23Sep_2016	2016-09-19	11:51:57	Ok	FALSE	Mila	PB	Spring	F6	PB065	-33.1359	18.0039	34	2	2016-09-09	2016-09-23	animal	0	0	NA	NA	kudu	3	kudu	3	Natural	NA	NA	flat	old road	2	NA	adult female
I_00151c.JPG		PB065_Cam2_9-23Sep_2016	2016-09-19	11:51:57	Ok	FALSE	Mila	PB	Spring	F6	PB065	-33.1359	18.0039	34	2	2016-09-09	2016-09-23	animal	0	0	NA	NA	kudu	3	kudu	3	Natural	NA	NA	flat	old road	2	NA	adult female
I_00155b.JPG		PB065_Cam2_9-23Sep_2016	2016-09-19	12:21:05	Ok	FALSE	Mila	PB	Spring	F6	PB065	-33.1359	18.0039	34	2	2016-09-09	2016-09-23	animal	0	0	NA	NA	kudu	1	kudu	1	Natural	NA	NA	flat	old road	2	NA	adult male
I_00155c.JPG		PB065_Cam2_9-23Sep_2016	2016-09-19	12:21:05	Ok	FALSE	Mila	PB	Spring	F6	PB065	-33.1359	18.0039	34	2	2016-09-09	2016-09-23	animal	0	0	NA	NA	kudu	1	kudu	1	Natural	NA	NA	flat	old road	2	NA	adult male
I_00155a.JPG		PB065_Cam2_9-23Sep_2016	2016-09-19	12:21:05	Ok	FALSE	Mila	PB	Spring	F6	PB065	-33.1359	18.0039	34	2	2016-09-09	2016-09-23	animal	0	0	NA	NA	kudu	2	kudu	2	Natural	NA	NA	flat	old road	2	NA	adult male
I_00156a.JPG		PB065_Cam2_9-23Sep_2016	2016-09-19	12:21:31	Ok	FALSE	Mila	PB	Spring	F6	PB065	-33.1359	18.0039	34	2	2016-09-09	2016-09-23	animal	0	0	NA	NA	kudu	2	kudu	2	Natural	NA	NA	flat	old road	2	NA	adult male
I_00156b.JPG		PB065_Cam2_9-23Sep_2016	2016-09-19	12:21:31	Ok	FALSE	Mila	PB	Spring	F6	PB065	-33.1359	18.0039	34	2	2016-09-09	2016-09-23	animal	0	0	NA	NA	kudu	2	kudu	2	Natural	NA	NA	flat	old road	2	NA	adult male
I_00156c.JPG		PB065_Cam2_9-23Sep_2016	2016-09-19	12:21:31	Ok	FALSE	Mila	PB	Spring	F6	PB065	-33.1359	18.0039	34	2	2016-09-09	2016-09-23	animal	0	0	NA	NA	kudu	2	kudu	2	Natural	NA	NA	flat	old road	2	NA	adult male
I_00160c.JPG		PB065_Cam2_9-23Sep_2016	2016-09-19	18:44:39	Ok	FALSE	Mila	PB	Spring	F6	PB065	-33.1359	18.0039	34	2	2016-09-09	2016-09-23	animal	0	0	NA	NA	kudu	1	kudu	1	Natural	NA	1 A U	flat	old road	2	NA	NA
I_00160a.JPG		PB065_Cam2_9-23Sep_2016	2016-09-19	18:44:39	Ok	FALSE	Mila	PB	Spring	F6	PB065	-33.1359	18.0039	34	2	2016-09-09	2016-09-23	animal	0	0	NA	NA	kudu	2	kudu	2	Natural	NA	2 A U	flat	old road	2	NA	NA
I_00160b.JPG		PB065_Cam2_9-23Sep_2016	2016-09-19	18:44:39	Ok	FALSE	Mila	PB	Spring	F6	PB065	-33.1359	18.0039	34	2	2016-09-09	2016-09-23	animal	0	0	NA	NA	kudu	2	kudu	2	Natural	NA	2 A U	flat	old road	2	NA	NA
I_00179a.JPG		PB065_Cam2_9-23Sep_2016	2016-09-23	12:40:29	Ok	FALSE	Mila	PB	Spring	F6	PB065	-33.1359	18.0039	34	2	2016-09-09	2016-09-23	animal	0	0	NA	NA	kudu	1	kudu	1	Natural	NA	NA	flat	old road	2	NA	adult male
I_00179b.JPG		PB065_Cam2_9-23Sep_2016	2016-09-23	12:40:29	Ok	FALSE	Mila	PB	Spring	F6	PB065	-33.1359	18.0039	34	2	2016-09-09	2016-09-23	animal	0	0	NA	NA	kudu	1	kudu	1	Natural	NA	NA	flat	old road	2	NA	adult male
I_00029a.JPG		PB065_Cam2_9-23Sep_2016	2016-09-11	09:30:17	Ok	FALSE	Mila	PB	Spring	F6	PB065	-33.1359	18.0039	34	2	2016-09-09	2016-09-23	animal	0	0	NA	NA	ostrich	1	ostrich	1	Natural	NA	NA	flat	old road	2	NA	adult male
I_00029b.JPG		PB065_Cam2_9-23Sep_2016	2016-09-11	09:30:17	Ok	FALSE	Mila	PB	Spring	F6	PB065	-33.1359	18.0039	34	2	2016-09-09	2016-09-23	animal	0	0	NA	NA	ostrich	1	ostrich	1	Natural	NA	NA	flat	old road	2	NA	adult male
I_00030a.JPG		PB065_Cam2_9-23Sep_2016	2016-09-11	09:46:50	Ok	FALSE	Mila	PB	Spring	F6	PB065	-33.1359	18.0039	34	2	2016-09-09	2016-09-23	animal	0	0	NA	NA	ostrich	1	ostrich	1	Natural	NA	NA	flat	old road	2	NA	adult male
I_00030b.JPG		PB065_Cam2_9-23Sep_2016	2016-09-11	09:46:50	Ok	FALSE	Mila	PB	Spring	F6	PB065	-33.1359	18.0039	34	2	2016-09-09	2016-09-23	animal	0	0	NA	NA	ostrich	1	ostrich	1	Natural	NA	NA	flat	old road	2	NA	adult male
I_00030c.JPG		PB065_Cam2_9-23Sep_2016	2016-09-11	09:46:50	Ok	FALSE	Mila	PB	Spring	F6	PB065	-33.1359	18.0039	34	2	2016-09-09	2016-09-23	animal	0	0	NA	NA	ostrich	1	ostrich	1	Natural	NA	NA	flat	old road	2	NA	adult male
I_00031a.JPG		PB065_Cam2_9-23Sep_2016	2016-09-11	09:52:22	Ok	FALSE	Mila	PB	Spring	F6	PB065	-33.1359	18.0039	34	2	2016-09-09	2016-09-23	animal	0	0	NA	NA	ostrich	1	ostrich	1	Natural	NA	NA	flat	old road	2	NA	adult female
I_00031b.JPG		PB065_Cam2_9-23Sep_2016	2016-09-11	09:52:22	Ok	FALSE	Mila	PB	Spring	F6	PB065	-33.1359	18.0039	34	2	2016-09-09	2016-09-23	animal	0	0	NA	NA	ostrich	1	ostrich	1	Natural	NA	NA	flat	old road	2	NA	adult female
I_00032a.JPG		PB065_Cam2_9-23Sep_2016	2016-09-11	09:53:10	Ok	FALSE	Mila	PB	Spring	F6	PB065	-33.1359	18.0039	34	2	2016-09-09	2016-09-23	animal	0	0	NA	NA	ostrich	1	ostrich	1	Natural	NA	NA	flat	old road	2	NA	adult male
I_00050a.JPG		PB065_Cam2_9-23Sep_2016	2016-09-12	13:20:04	Ok	FALSE	Mila	PB	Spring	F6	PB065	-33.1359	18.0039	34	2	2016-09-09	2016-09-23	animal	0	0	NA	NA	ostrich	1	ostrich	1	Natural	NA	NA	flat	old road	2	NA	adult male
I_00050b.JPG		PB065_Cam2_9-23Sep_2016	2016-09-12	13:20:04	Ok	FALSE	Mila	PB	Spring	F6	PB065	-33.1359	18.0039	34	2	2016-09-09	2016-09-23	animal	0	0	NA	NA	ostrich	1	ostrich	1	Natural	NA	NA	flat	old road	2	NA	adult male
I_00050c.JPG		PB065_Cam2_9-23Sep_2016	2016-09-12	13:20:04	Ok	FALSE	Mila	PB	Spring	F6	PB065	-33.1359	18.0039	34	2	2016-09-09	2016-09-23	animal	0	0	NA	NA	ostrich	1	ostrich	1	Natural	NA	NA	flat	old road	2	NA	adult male
I_00051a.JPG		PB065_Cam2_9-23Sep_2016	2016-09-12	13:22:15	Ok	FALSE	Mila	PB	Spring	F6	PB065	-33.1359	18.0039	34	2	2016-09-09	2016-09-23	animal	0	0	NA	NA	ostrich	1	ostrich	1	Natural	NA	NA	flat	old road	2	NA	adult male
I_00052a.JPG		PB065_Cam2_9-23Sep_2016	2016-09-12	13:31:24	Ok	FALSE	Mila	PB	Spring	F6	PB065	-33.1359	18.0039	34	2	2016-09-09	2016-09-23	animal	0	0	NA	NA	ostrich	1	ostrich	1	Natural	NA	NA	flat	old road	2	NA	adult male
I_00052b.JPG		PB065_Cam2_9-23Sep_2016	2016-09-12	13:31:24	Ok	FALSE	Mila	PB	Spring	F6	PB065	-33.1359	18.0039	34	2	2016-09-09	2016-09-23	animal	0	0	NA	NA	ostrich	1	ostrich	1	Natural	NA	NA	flat	old road	2	NA	adult male
I_00055a.JPG		PB065_Cam2_9-23Sep_2016	2016-09-13	09:28:17	Ok	FALSE	Mila	PB	Spring	F6	PB065	-33.1359	18.0039	34	2	2016-09-09	2016-09-23	animal	0	0	NA	NA	ostrich	1	ostrich	1	Natural	NA	NA	flat	old road	2	NA	adult male
I_00055b.JPG		PB065_Cam2_9-23Sep_2016	2016-09-13	09:28:17	Ok	FALSE	Mila	PB	Spring	F6	PB065	-33.1359	18.0039	34	2	2016-09-09	2016-09-23	animal	0	0	NA	NA	ostrich	1	ostrich	1	Natural	NA	NA	flat	old road	2	NA	adult male
I_00056a.JPG		PB065_Cam2_9-23Sep_2016	2016-09-13	09:30:20	Ok	FALSE	Mila	PB	Spring	F6	PB065	-33.1359	18.0039	34	2	2016-09-09	2016-09-23	animal	0	0	NA	NA	ostrich	1	ostrich	1	Natural	NA	NA	flat	old road	2	NA	adult male
I_00057a.JPG		PB065_Cam2_9-23Sep_2016	2016-09-13	10:24:05	Ok	FALSE	Mila	PB	Spring	F6	PB065	-33.1359	18.0039	34	2	2016-09-09	2016-09-23	animal	0	0	NA	NA	ostrich	1	ostrich	1	Natural	NA	NA	flat	old road	2	NA	adult female
I_00059a.JPG		PB065_Cam2_9-23Sep_2016	2016-09-13	13:17:00	Ok	FALSE	Mila	PB	Spring	F6	PB065	-33.1359	18.0039	34	2	2016-09-09	2016-09-23	animal	0	0	NA	NA	ostrich	1	ostrich	1	Natural	NA	NA	flat	old road	2	NA	adult female
I_00059b.JPG		PB065_Cam2_9-23Sep_2016	2016-09-13	13:17:00	Ok	FALSE	Mila	PB	Spring	F6	PB065	-33.1359	18.0039	34	2	2016-09-09	2016-09-23	animal	0	0	NA	NA	ostrich	1	ostrich	1	Natural	NA	NA	flat	old road	2	NA	adult female
I_00059c.JPG		PB065_Cam2_9-23Sep_2016	2016-09-13	13:17:00	Ok	FALSE	Mila	PB	Spring	F6	PB065	-33.1359	18.0039	34	2	2016-09-09	2016-09-23	animal	0	0	NA	NA	ostrich	1	ostrich	1	Natural	NA	NA	flat	old road	2	NA	adult female
I_00060a.JPG		PB065_Cam2_9-23Sep_2016	2016-09-13	13:17:25	Ok	FALSE	Mila	PB	Spring	F6	PB065	-33.1359	18.0039	34	2	2016-09-09	2016-09-23	animal	0	0	NA	NA	ostrich	1	ostrich	1	Natural	NA	NA	flat	old road	2	NA	adult female
I_00060b.JPG		PB065_Cam2_9-23Sep_2016	2016-09-13	13:17:25	Ok	FALSE	Mila	PB	Spring	F6	PB065	-33.1359	18.0039	34	2	2016-09-09	2016-09-23	animal	0	0	NA	NA	ostrich	1	ostrich	1	Natural	NA	NA	flat	old road	2	NA	adult female
I_00060c.JPG		PB065_Cam2_9-23Sep_2016	2016-09-13	13:17:25	Ok	FALSE	Mila	PB	Spring	F6	PB065	-33.1359	18.0039	34	2	2016-09-09	2016-09-23	animal	0	0	NA	NA	ostrich	1	ostrich	1	Natural	NA	NA	flat	old road	2	NA	adult female
I_00076c.JPG		PB065_Cam2_9-23Sep_2016	2016-09-14	09:55:35	Ok	FALSE	Mila	PB	Spring	F6	PB065	-33.1359	18.0039	34	2	2016-09-09	2016-09-23	animal	0	0	NA	NA	ostrich	1	ostrich	1	Natural	NA	NA	flat	old road	2	NA	adult male
I_00076b.JPG		PB065_Cam2_9-23Sep_2016	2016-09-14	09:55:35	Ok	FALSE	Mila	PB	Spring	F6	PB065	-33.1359	18.0039	34	2	2016-09-09	2016-09-23	animal	0	0	NA	NA	ostrich	3	ostrich	3	Natural	NA	2 J U, 1 A U	flat	old road	2	NA	NA
I_00076a.JPG		PB065_Cam2_9-23Sep_2016	2016-09-14	09:55:35	Ok	FALSE	Mila	PB	Spring	F6	PB065	-33.1359	18.0039	34	2	2016-09-09	2016-09-23	animal	0	0	NA	NA	ostrich	4	ostrich	4	Natural	NA	4 J U	flat	old road	2	NA	NA
I_00077a.JPG		PB065_Cam2_9-23Sep_2016	2016-09-14	09:56:00	Ok	FALSE	Mila	PB	Spring	F6	PB065	-33.1359	18.0039	34	2	2016-09-09	2016-09-23	animal	0	0	NA	NA	ostrich	1	ostrich	1	Natural	NA	NA	flat	old road	2	NA	adult female
I_00087a.JPG		PB065_Cam2_9-23Sep_2016	2016-09-14	12:38:58	Ok	FALSE	Mila	PB	Spring	F6	PB065	-33.1359	18.0039	34	2	2016-09-09	2016-09-23	animal	0	0	NA	NA	ostrich	1	ostrich	1	Natural	NA	NA	flat	old road	2	NA	adult male
I_00087b.JPG		PB065_Cam2_9-23Sep_2016	2016-09-14	12:38:58	Ok	FALSE	Mila	PB	Spring	F6	PB065	-33.1359	18.0039	34	2	2016-09-09	2016-09-23	animal	0	0	NA	NA	ostrich	1	ostrich	1	Natural	NA	NA	flat	old road	2	NA	adult male
I_00112c.JPG		PB065_Cam2_9-23Sep_2016	2016-09-16	12:36:17	Ok	FALSE	Mila	PB	Spring	F6	PB065	-33.1359	18.0039	34	2	2016-09-09	2016-09-23	animal	0	0	NA	NA	ostrich	1	ostrich	1	Natural	NA	NA	flat	old road	2	NA	adult female
I_00112a.JPG		PB065_Cam2_9-23Sep_2016	2016-09-16	12:36:17	Ok	FALSE	Mila	PB	Spring	F6	PB065	-33.1359	18.0039	34	2	2016-09-09	2016-09-23	animal	0	0	NA	NA	ostrich	1	ostrich	1	Natural	NA	NA	flat	old road	2	NA	adult female
I_00112b.JPG		PB065_Cam2_9-23Sep_2016	2016-09-16	12:36:17	Ok	FALSE	Mila	PB	Spring	F6	PB065	-33.1359	18.0039	34	2	2016-09-09	2016-09-23	animal	0	0	NA	NA	ostrich	1	ostrich	1	Natural	NA	NA	flat	old road	2	NA	adult female
I_00113a.JPG		PB065_Cam2_9-23Sep_2016	2016-09-16	13:57:03	Ok	FALSE	Mila	PB	Spring	F6	PB065	-33.1359	18.0039	34	2	2016-09-09	2016-09-23	animal	0	0	NA	NA	ostrich	1	ostrich	1	Natural	NA	NA	flat	old road	2	NA	adult female
I_00120a.JPG		PB065_Cam2_9-23Sep_2016	2016-09-17	10:51:19	Ok	FALSE	Mila	PB	Spring	F6	PB065	-33.1359	18.0039	34	2	2016-09-09	2016-09-23	animal	0	0	NA	NA	ostrich	2	ostrich	2	Natural	NA	2 J U	flat	old road	2	NA	NA
I_00120b.JPG		PB065_Cam2_9-23Sep_2016	2016-09-17	10:51:19	Ok	FALSE	Mila	PB	Spring	F6	PB065	-33.1359	18.0039	34	2	2016-09-09	2016-09-23	animal	0	0	NA	NA	ostrich	4	ostrich	4	Natural	NA	4 J U	flat	old road	2	NA	NA
I_00120c.JPG		PB065_Cam2_9-23Sep_2016	2016-09-17	10:51:19	Ok	FALSE	Mila	PB	Spring	F6	PB065	-33.1359	18.0039	34	2	2016-09-09	2016-09-23	animal	0	0	NA	NA	ostrich	4	ostrich	4	Natural	NA	4 J U	flat	old road	2	NA	NA
I_00121b.JPG		PB065_Cam2_9-23Sep_2016	2016-09-17	10:51:44	Ok	FALSE	Mila	PB	Spring	F6	PB065	-33.1359	18.0039	34	2	2016-09-09	2016-09-23	animal	0	0	NA	NA	ostrich	6	ostrich	6	Natural	NA	6 J U	flat	old road	2	NA	NA
I_00121c.JPG		PB065_Cam2_9-23Sep_2016	2016-09-17	10:51:44	Ok	FALSE	Mila	PB	Spring	F6	PB065	-33.1359	18.0039	34	2	2016-09-09	2016-09-23	animal	0	0	NA	NA	ostrich	8	ostrich	8	Natural	NA	8 J U	flat	old road	2	NA	NA
I_00121a.JPG		PB065_Cam2_9-23Sep_2016	2016-09-17	10:51:44	Ok	FALSE	Mila	PB	Spring	F6	PB065	-33.1359	18.0039	34	2	2016-09-09	2016-09-23	animal	0	0	NA	NA	ostrich	10	ostrich	10	Natural	NA	10 J U	flat	old road	2	NA	NA
I_00122c.JPG		PB065_Cam2_9-23Sep_2016	2016-09-17	10:52:09	Ok	FALSE	Mila	PB	Spring	F6	PB065	-33.1359	18.0039	34	2	2016-09-09	2016-09-23	animal	0	0	NA	NA	ostrich	2	ostrich	2	Natural	NA	2 J U	flat	old road	2	NA	NA
I_00122a.JPG		PB065_Cam2_9-23Sep_2016	2016-09-17	10:52:09	Ok	FALSE	Mila	PB	Spring	F6	PB065	-33.1359	18.0039	34	2	2016-09-09	2016-09-23	animal	0	0	NA	NA	ostrich	5	ostrich	5	Natural	NA	5 J U	flat	old road	2	NA	NA
I_00122b.JPG		PB065_Cam2_9-23Sep_2016	2016-09-17	10:52:09	Ok	FALSE	Mila	PB	Spring	F6	PB065	-33.1359	18.0039	34	2	2016-09-09	2016-09-23	animal	0	0	NA	NA	ostrich	6	ostrich	6	Natural	NA	6 J U	flat	old road	2	NA	NA
I_00124a.JPG		PB065_Cam2_9-23Sep_2016	2016-09-17	17:04:29	Ok	FALSE	Mila	PB	Spring	F6	PB065	-33.1359	18.0039	34	2	2016-09-09	2016-09-23	animal	0	0	NA	NA	ostrich	1	ostrich	1	Natural	NA	NA	flat	old road	2	NA	adult female
I_00124b.JPG		PB065_Cam2_9-23Sep_2016	2016-09-17	17:04:29	Ok	FALSE	Mila	PB	Spring	F6	PB065	-33.1359	18.0039	34	2	2016-09-09	2016-09-23	animal	0	0	NA	NA	ostrich	1	ostrich	1	Natural	NA	NA	flat	old road	2	NA	adult female
I_00125a.JPG		PB065_Cam2_9-23Sep_2016	2016-09-17	17:06:24	Ok	FALSE	Mila	PB	Spring	F6	PB065	-33.1359	18.0039	34	2	2016-09-09	2016-09-23	animal	0	0	NA	NA	ostrich	1	ostrich	1	Natural	NA	NA	flat	old road	2	NA	adult female
I_00139a.JPG		PB065_Cam2_9-23Sep_2016	2016-09-18	18:10:29	Ok	FALSE	Mila	PB	Spring	F6	PB065	-33.1359	18.0039	34	2	2016-09-09	2016-09-23	animal	0	0	NA	NA	ostrich	1	ostrich	1	Natural	NA	NA	flat	old road	2	NA	adult male
I_00139b.JPG		PB065_Cam2_9-23Sep_2016	2016-09-18	18:10:29	Ok	FALSE	Mila	PB	Spring	F6	PB065	-33.1359	18.0039	34	2	2016-09-09	2016-09-23	animal	0	0	NA	NA	ostrich	1	ostrich	1	Natural	NA	NA	flat	old road	2	NA	adult male
I_00141a.JPG		PB065_Cam2_9-23Sep_2016	2016-09-18	18:43:18	Ok	FALSE	Mila	PB	Spring	F6	PB065	-33.1359	18.0039	34	2	2016-09-09	2016-09-23	animal	0	0	NA	NA	ostrich	1	ostrich	1	Natural	NA	NA	flat	old road	2	NA	adult male
I_00141b.JPG		PB065_Cam2_9-23Sep_2016	2016-09-18	18:43:18	Ok	FALSE	Mila	PB	Spring	F6	PB065	-33.1359	18.0039	34	2	2016-09-09	2016-09-23	animal	0	0	NA	NA	ostrich	1	ostrich	1	Natural	NA	NA	flat	old road	2	NA	adult male
I_00141c.JPG		PB065_Cam2_9-23Sep_2016	2016-09-18	18:43:18	Ok	FALSE	Mila	PB	Spring	F6	PB065	-33.1359	18.0039	34	2	2016-09-09	2016-09-23	animal	0	0	NA	NA	ostrich	1	ostrich	1	Natural	NA	NA	flat	old road	2	NA	adult female
I_00142c.JPG		PB065_Cam2_9-23Sep_2016	2016-09-18	18:51:49	Ok	FALSE	Mila	PB	Spring	F6	PB065	-33.1359	18.0039	34	2	2016-09-09	2016-09-23	animal	0	0	NA	NA	ostrich	1	ostrich	1	Natural	NA	NA	flat	old road	2	NA	adult female
I_00142a.JPG		PB065_Cam2_9-23Sep_2016	2016-09-18	18:51:49	Ok	FALSE	Mila	PB	Spring	F6	PB065	-33.1359	18.0039	34	2	2016-09-09	2016-09-23	animal	0	0	NA	NA	ostrich	1	ostrich	1	Natural	NA	NA	flat	old road	2	NA	adult female
I_00142b.JPG		PB065_Cam2_9-23Sep_2016	2016-09-18	18:51:49	Ok	FALSE	Mila	PB	Spring	F6	PB065	-33.1359	18.0039	34	2	2016-09-09	2016-09-23	animal	0	0	NA	NA	ostrich	1	ostrich	1	Natural	NA	NA	flat	old road	2	NA	adult female
I_00147a.JPG		PB065_Cam2_9-23Sep_2016	2016-09-19	06:37:23	Ok	FALSE	Mila	PB	Spring	F6	PB065	-33.1359	18.0039	34	2	2016-09-09	2016-09-23	animal	0	0	NA	NA	ostrich	1	ostrich	1	Natural	NA	NA	flat	old road	2	NA	adult female
I_00147b.JPG		PB065_Cam2_9-23Sep_2016	2016-09-19	06:37:23	Ok	FALSE	Mila	PB	Spring	F6	PB065	-33.1359	18.0039	34	2	2016-09-09	2016-09-23	animal	0	0	NA	NA	ostrich	1	ostrich	1	Natural	NA	NA	flat	old road	2	NA	adult female
I_00147c.JPG		PB065_Cam2_9-23Sep_2016	2016-09-19	06:37:23	Ok	FALSE	Mila	PB	Spring	F6	PB065	-33.1359	18.0039	34	2	2016-09-09	2016-09-23	animal	0	0	NA	NA	ostrich	1	ostrich	1	Natural	NA	NA	flat	old road	2	NA	adult male
I_00159a.JPG		PB065_Cam2_9-23Sep_2016	2016-09-19	16:05:51	Ok	FALSE	Mila	PB	Spring	F6	PB065	-33.1359	18.0039	34	2	2016-09-09	2016-09-23	animal	0	0	NA	NA	ostrich	1	ostrich	1	Natural	NA	NA	flat	old road	2	NA	adult male
I_00159b.JPG		PB065_Cam2_9-23Sep_2016	2016-09-19	16:05:51	Ok	FALSE	Mila	PB	Spring	F6	PB065	-33.1359	18.0039	34	2	2016-09-09	2016-09-23	animal	0	0	NA	NA	ostrich	1	ostrich	1	Natural	NA	NA	flat	old road	2	NA	adult male
I_00164a.JPG		PB065_Cam2_9-23Sep_2016	2016-09-20	08:53:02	Ok	FALSE	Mila	PB	Spring	F6	PB065	-33.1359	18.0039	34	2	2016-09-09	2016-09-23	animal	0	0	NA	NA	ostrich	1	ostrich	1	Natural	NA	NA	flat	old road	2	NA	adult male
I_00164b.JPG		PB065_Cam2_9-23Sep_2016	2016-09-20	08:53:02	Ok	FALSE	Mila	PB	Spring	F6	PB065	-33.1359	18.0039	34	2	2016-09-09	2016-09-23	animal	0	0	NA	NA	ostrich	1	ostrich	1	Natural	NA	NA	flat	old road	2	NA	adult male
I_00164c.JPG		PB065_Cam2_9-23Sep_2016	2016-09-20	08:53:02	Ok	FALSE	Mila	PB	Spring	F6	PB065	-33.1359	18.0039	34	2	2016-09-09	2016-09-23	animal	0	0	NA	NA	ostrich	1	ostrich	1	Natural	NA	NA	flat	old road	2	NA	adult male
I_00167a.JPG		PB065_Cam2_9-23Sep_2016	2016-09-21	09:32:50	Ok	FALSE	Mila	PB	Spring	F6	PB065	-33.1359	18.0039	34	2	2016-09-09	2016-09-23	animal	0	0	NA	NA	ostrich	1	ostrich	1	Natural	NA	NA	flat	old road	2	NA	sub-adult female
I_00167b.JPG		PB065_Cam2_9-23Sep_2016	2016-09-21	09:32:50	Ok	FALSE	Mila	PB	Spring	F6	PB065	-33.1359	18.0039	34	2	2016-09-09	2016-09-23	animal	0	0	NA	NA	ostrich	1	ostrich	1	Natural	NA	NA	flat	old road	2	NA	sub-adult female
I_00167c.JPG		PB065_Cam2_9-23Sep_2016	2016-09-21	09:32:50	Ok	FALSE	Mila	PB	Spring	F6	PB065	-33.1359	18.0039	34	2	2016-09-09	2016-09-23	animal	0	0	NA	NA	ostrich	1	ostrich	1	Natural	NA	NA	flat	old road	2	NA	sub-adult female
I_00168a.JPG		PB065_Cam2_9-23Sep_2016	2016-09-21	09:33:21	Ok	FALSE	Mila	PB	Spring	F6	PB065	-33.1359	18.0039	34	2	2016-09-09	2016-09-23	animal	0	0	NA	NA	ostrich	1	ostrich	1	Natural	NA	NA	flat	old road	2	NA	sub-adult female
I_00168b.JPG		PB065_Cam2_9-23Sep_2016	2016-09-21	09:33:21	Ok	FALSE	Mila	PB	Spring	F6	PB065	-33.1359	18.0039	34	2	2016-09-09	2016-09-23	animal	0	0	NA	NA	ostrich	1	ostrich	1	Natural	NA	NA	flat	old road	2	NA	sub-adult female
I_00169c.JPG		PB065_Cam2_9-23Sep_2016	2016-09-21	09:33:56	Ok	FALSE	Mila	PB	Spring	F6	PB065	-33.1359	18.0039	34	2	2016-09-09	2016-09-23	animal	0	0	NA	NA	ostrich	1	ostrich	1	Natural	NA	NA	flat	old road	2	NA	adult female
I_00169a.JPG		PB065_Cam2_9-23Sep_2016	2016-09-21	09:33:56	Ok	FALSE	Mila	PB	Spring	F6	PB065	-33.1359	18.0039	34	2	2016-09-09	2016-09-23	animal	0	0	NA	NA	ostrich	2	ostrich	2	Natural	NA	NA	flat	old road	2	NA	adult female
I_00169b.JPG		PB065_Cam2_9-23Sep_2016	2016-09-21	09:33:56	Ok	FALSE	Mila	PB	Spring	F6	PB065	-33.1359	18.0039	34	2	2016-09-09	2016-09-23	animal	0	0	NA	NA	ostrich	2	ostrich	2	Natural	NA	NA	flat	old road	2	NA	adult female
I_00012a.JPG		PB065_Cam2_9-23Sep_2016	2016-09-10	08:14:15	Ok	FALSE	Mila	PB	Spring	F6	PB065	-33.1359	18.0039	34	2	2016-09-09	2016-09-23	animal	0	0	NA	NA	pied crow	1	pied crow	1	Natural	NA	Unknown sex and age	flat	old road	2	NA	NA
I_00012b.JPG		PB065_Cam2_9-23Sep_2016	2016-09-10	08:14:15	Ok	FALSE	Mila	PB	Spring	F6	PB065	-33.1359	18.0039	34	2	2016-09-09	2016-09-23	animal	0	0	NA	NA	pied crow	1	pied crow	1	Natural	NA	Unknown sex and age	flat	old road	2	NA	NA
I_00012c.JPG		PB065_Cam2_9-23Sep_2016	2016-09-10	08:14:15	Ok	FALSE	Mila	PB	Spring	F6	PB065	-33.1359	18.0039	34	2	2016-09-09	2016-09-23	animal	0	0	NA	NA	pied crow	1	pied crow	1	Natural	NA	Unknown sex and age	flat	old road	2	NA	NA
I_00021c.JPG		PB065_Cam2_9-23Sep_2016	2016-09-10	12:44:13	Ok	FALSE	Mila	PB	Spring	F6	PB065	-33.1359	18.0039	34	2	2016-09-09	2016-09-23	animal	0	0	NA	NA	pied crow	1	pied crow	1	Natural	NA	Unknown sex and age	flat	old road	2	NA	NA
I_00133a.JPG		PB065_Cam2_9-23Sep_2016	2016-09-18	16:50:02	Ok	FALSE	Mila	PB	Spring	F6	PB065	-33.1359	18.0039	34	2	2016-09-09	2016-09-23	animal	0	0	NA	NA	pied crow	1	pied crow	1	Natural	NA	Unknown age and sex	flat	old road	2	NA	NA
I_00133b.JPG		PB065_Cam2_9-23Sep_2016	2016-09-18	16:50:02	Ok	FALSE	Mila	PB	Spring	F6	PB065	-33.1359	18.0039	34	2	2016-09-09	2016-09-23	animal	0	0	NA	NA	pied crow	1	pied crow	1	Natural	NA	Unknown age and sex	flat	old road	2	NA	NA
I_00133c.JPG		PB065_Cam2_9-23Sep_2016	2016-09-18	16:50:02	Ok	FALSE	Mila	PB	Spring	F6	PB065	-33.1359	18.0039	34	2	2016-09-09	2016-09-23	animal	0	0	NA	NA	pied crow	1	pied crow	1	Natural	NA	Unknown age and sex	flat	old road	2	NA	NA
I_00143a.JPG		PB065_Cam2_9-23Sep_2016	2016-09-18	20:52:37	Ok	FALSE	Mila	PB	Spring	F6	PB065	-33.1359	18.0039	34	2	2016-09-09	2016-09-23	animal	0	0	NA	NA	porcupine	1	porcupine	1	Natural	NA	1 A U	flat	old road	2	NA	NA
I_00143b.JPG		PB065_Cam2_9-23Sep_2016	2016-09-18	20:52:37	Ok	FALSE	Mila	PB	Spring	F6	PB065	-33.1359	18.0039	34	2	2016-09-09	2016-09-23	animal	0	0	NA	NA	porcupine	1	porcupine	1	Natural	NA	1 A U	flat	old road	2	NA	NA
I_00143c.JPG		PB065_Cam2_9-23Sep_2016	2016-09-18	20:52:37	Ok	FALSE	Mila	PB	Spring	F6	PB065	-33.1359	18.0039	34	2	2016-09-09	2016-09-23	animal	0	0	NA	NA	porcupine	2	porcupine	2	Natural	NA	2 A U	flat	old road	2	NA	NA
I_00136a.JPG		PB065_Cam2_9-23Sep_2016	2016-09-18	17:44:04	Ok	FALSE	Mila	PB	Spring	F6	PB065	-33.1359	18.0039	34	2	2016-09-09	2016-09-23	animal	0	0	NA	NA	sacred ibis	3	sacred ibis	3	Natural	NA	1 guinea fowl, 3 sacred ibis	flat	old road	2	NA	NA
I_00136b.JPG		PB065_Cam2_9-23Sep_2016	2016-09-18	17:44:04	Ok	FALSE	Mila	PB	Spring	F6	PB065	-33.1359	18.0039	34	2	2016-09-09	2016-09-23	animal	0	0	NA	NA	sacred ibis	3	sacred ibis	3	Natural	NA	1 guinea fowl, 3 sacred ibis	flat	old road	2	NA	NA
I_00136c.JPG		PB065_Cam2_9-23Sep_2016	2016-09-18	17:44:04	Ok	FALSE	Mila	PB	Spring	F6	PB065	-33.1359	18.0039	34	2	2016-09-09	2016-09-23	animal	0	0	NA	NA	sacred ibis	3	sacred ibis	3	Natural	NA	1 guinea fowl, 3 sacred ibis	flat	old road	2	NA	NA
I_00137a.JPG		PB065_Cam2_9-23Sep_2016	2016-09-18	17:44:44	Ok	FALSE	Mila	PB	Spring	F6	PB065	-33.1359	18.0039	34	2	2016-09-09	2016-09-23	animal	0	0	NA	NA	sacred ibis	1	sacred ibis	1	Natural	NA	1 guinea fowl, sacred ibis	flat	old road	2	NA	NA
I_00137b.JPG		PB065_Cam2_9-23Sep_2016	2016-09-18	17:44:44	Ok	FALSE	Mila	PB	Spring	F6	PB065	-33.1359	18.0039	34	2	2016-09-09	2016-09-23	animal	0	0	NA	NA	sacred ibis	1	sacred ibis	1	Natural	NA	1 guinea fowl, 1 sacred ibis	flat	old road	2	NA	NA
I_00138a.JPG		PB065_Cam2_9-23Sep_2016	2016-09-18	17:55:56	Ok	FALSE	Mila	PB	Spring	F6	PB065	-33.1359	18.0039	34	2	2016-09-09	2016-09-23	animal	0	0	NA	NA	sacred ibis	1	sacred ibis	1	Natural	NA	Unknown age and sex	flat	old road	2	NA	NA
I_00034a.JPG		PB065_Cam2_9-23Sep_2016	2016-09-11	10:27:54	Ok	FALSE	Mila	PB	Spring	F6	PB065	-33.1359	18.0039	34	2	2016-09-09	2016-09-23	animal	0	0	NA	NA	springbok	1	springbok	1	Natural	NA	1 A U	flat	old road	2	NA	NA
I_00054a.JPG		PB065_Cam2_9-23Sep_2016	2016-09-13	09:26:52	Ok	FALSE	Mila	PB	Spring	F6	PB065	-33.1359	18.0039	34	2	2016-09-09	2016-09-23	animal	0	0	NA	NA	springbok	1	springbok	1	Natural	NA	1 A U	flat	old road	2	NA	NA
I_00058a.JPG		PB065_Cam2_9-23Sep_2016	2016-09-13	11:02:32	Ok	FALSE	Mila	PB	Spring	F6	PB065	-33.1359	18.0039	34	2	2016-09-09	2016-09-23	animal	0	0	NA	NA	springbok	1	springbok	1	Natural	NA	NA	flat	old road	2	NA	adult male
I_00058b.JPG		PB065_Cam2_9-23Sep_2016	2016-09-13	11:02:32	Ok	FALSE	Mila	PB	Spring	F6	PB065	-33.1359	18.0039	34	2	2016-09-09	2016-09-23	animal	0	0	NA	NA	springbok	1	springbok	1	Natural	NA	NA	flat	old road	2	NA	adult male
I_00058c.JPG		PB065_Cam2_9-23Sep_2016	2016-09-13	11:02:32	Ok	FALSE	Mila	PB	Spring	F6	PB065	-33.1359	18.0039	34	2	2016-09-09	2016-09-23	animal	0	0	NA	NA	springbok	1	springbok	1	Natural	NA	NA	flat	old road	2	NA	adult male
I_00061a.JPG		PB065_Cam2_9-23Sep_2016	2016-09-13	13:56:54	Ok	FALSE	Mila	PB	Spring	F6	PB065	-33.1359	18.0039	34	2	2016-09-09	2016-09-23	animal	0	0	NA	NA	springbok	1	springbok	1	Natural	NA	NA	flat	old road	2	NA	adult male
I_00074b.JPG		PB065_Cam2_9-23Sep_2016	2016-09-14	07:26:30	Ok	FALSE	Mila	PB	Spring	F6	PB065	-33.1359	18.0039	34	2	2016-09-09	2016-09-23	animal	0	0	NA	NA	springbok	1	springbok	1	Natural	NA	1 A U	flat	old road	2	NA	NA
I_00096a.JPG		PB065_Cam2_9-23Sep_2016	2016-09-15	07:50:05	Ok	FALSE	Mila	PB	Spring	F6	PB065	-33.1359	18.0039	34	2	2016-09-09	2016-09-23	animal	0	0	NA	NA	springbok	1	springbok	1	Natural	NA	NA	flat	old road	2	NA	adult male
I_00097a.JPG		PB065_Cam2_9-23Sep_2016	2016-09-15	08:24:55	Ok	FALSE	Mila	PB	Spring	F6	PB065	-33.1359	18.0039	34	2	2016-09-09	2016-09-23	animal	0	0	NA	NA	springbok	1	springbok	1	Natural	NA	1 A U	flat	old road	2	NA	NA
I_00105a.JPG		PB065_Cam2_9-23Sep_2016	2016-09-16	09:29:31	Ok	FALSE	Mila	PB	Spring	F6	PB065	-33.1359	18.0039	34	2	2016-09-09	2016-09-23	animal	0	0	NA	NA	springbok	1	springbok	1	Natural	NA	NA	flat	old road	2	NA	adult male
I_00111a.JPG		PB065_Cam2_9-23Sep_2016	2016-09-16	11:25:49	Ok	FALSE	Mila	PB	Spring	F6	PB065	-33.1359	18.0039	34	2	2016-09-09	2016-09-23	animal	0	0	NA	NA	springbok	1	springbok	1	Natural	NA	1 A U	flat	old road	2	NA	NA
I_00145a.JPG		PB065_Cam2_9-23Sep_2016	2016-09-19	00:11:19	Ok	FALSE	Mila	PB	Spring	F6	PB065	-33.1359	18.0039	34	2	2016-09-09	2016-09-23	animal	0	0	NA	NA	springbok	1	springbok	1	Natural	NA	1 A U	flat	old road	2	NA	NA
I_00145b.JPG		PB065_Cam2_9-23Sep_2016	2016-09-19	00:11:19	Ok	FALSE	Mila	PB	Spring	F6	PB065	-33.1359	18.0039	34	2	2016-09-09	2016-09-23	animal	0	0	NA	NA	springbok	1	springbok	1	Natural	NA	1 A U	flat	old road	2	NA	NA
I_00148a.JPG		PB065_Cam2_9-23Sep_2016	2016-09-19	08:57:57	Ok	FALSE	Mila	PB	Spring	F6	PB065	-33.1359	18.0039	34	2	2016-09-09	2016-09-23	animal	0	0	NA	NA	springbok	1	springbok	1	Natural	NA	1 A U	flat	old road	2	NA	NA
I_00157a.JPG		PB065_Cam2_9-23Sep_2016	2016-09-19	12:29:03	Ok	FALSE	Mila	PB	Spring	F6	PB065	-33.1359	18.0039	34	2	2016-09-09	2016-09-23	animal	0	0	NA	NA	springbok	1	springbok	1	Natural	NA	Unknown age and sex	flat	old road	2	NA	NA
I_00157b.JPG		PB065_Cam2_9-23Sep_2016	2016-09-19	12:29:03	Ok	FALSE	Mila	PB	Spring	F6	PB065	-33.1359	18.0039	34	2	2016-09-09	2016-09-23	animal	0	0	NA	NA	springbok	1	springbok	1	Natural	NA	Unknown age and sex	flat	old road	2	NA	NA
I_00157c.JPG		PB065_Cam2_9-23Sep_2016	2016-09-19	12:29:03	Ok	FALSE	Mila	PB	Spring	F6	PB065	-33.1359	18.0039	34	2	2016-09-09	2016-09-23	animal	0	0	NA	NA	springbok	1	springbok	1	Natural	NA	Unknown age and sex	flat	old road	2	NA	NA
I_00163a.JPG		PB065_Cam2_9-23Sep_2016	2016-09-20	08:34:37	Ok	FALSE	Mila	PB	Spring	F6	PB065	-33.1359	18.0039	34	2	2016-09-09	2016-09-23	animal	0	0	NA	NA	springbok	1	springbok	1	Natural	NA	1 A U	flat	old road	2	NA	NA
I_00163b.JPG		PB065_Cam2_9-23Sep_2016	2016-09-20	08:34:37	Ok	FALSE	Mila	PB	Spring	F6	PB065	-33.1359	18.0039	34	2	2016-09-09	2016-09-23	animal	0	0	NA	NA	springbok	1	springbok	1	Natural	NA	1 A U	flat	old road	2	NA	NA
I_00165a.JPG		PB065_Cam2_9-23Sep_2016	2016-09-20	11:28:12	Ok	FALSE	Mila	PB	Spring	F6	PB065	-33.1359	18.0039	34	2	2016-09-09	2016-09-23	animal	0	0	NA	NA	springbok	1	springbok	1	Natural	NA	1 A U	flat	old road	2	NA	NA
I_00173a.JPG		PB065_Cam2_9-23Sep_2016	2016-09-22	08:33:55	Ok	FALSE	Mila	PB	Spring	F6	PB065	-33.1359	18.0039	34	2	2016-09-09	2016-09-23	animal	0	0	NA	NA	springbok	1	springbok	1	Natural	NA	1 A U	flat	old road	2	NA	NA
I_00173b.JPG		PB065_Cam2_9-23Sep_2016	2016-09-22	08:33:55	Ok	FALSE	Mila	PB	Spring	F6	PB065	-33.1359	18.0039	34	2	2016-09-09	2016-09-23	animal	0	0	NA	NA	springbok	1	springbok	1	Natural	NA	1 A U	flat	old road	2	NA	NA
I_00173c.JPG		PB065_Cam2_9-23Sep_2016	2016-09-22	08:33:55	Ok	FALSE	Mila	PB	Spring	F6	PB065	-33.1359	18.0039	34	2	2016-09-09	2016-09-23	animal	0	0	NA	NA	springbok	1	springbok	1	Natural	NA	1 A U	flat	old road	2	NA	NA
I_00174a.JPG		PB065_Cam2_9-23Sep_2016	2016-09-22	08:35:55	Ok	FALSE	Mila	PB	Spring	F6	PB065	-33.1359	18.0039	34	2	2016-09-09	2016-09-23	animal	0	0	NA	NA	springbok	1	springbok	1	Natural	NA	1 A U	flat	old road	2	NA	NA
I_00178a.JPG		PB065_Cam2_9-23Sep_2016	2016-09-23	08:28:23	Ok	FALSE	Mila	PB	Spring	F6	PB065	-33.1359	18.0039	34	2	2016-09-09	2016-09-23	animal	0	0	NA	NA	springbok	1	springbok	1	Natural	NA	1 A U	flat	old road	2	NA	NA
I_00178b.JPG		PB065_Cam2_9-23Sep_2016	2016-09-23	08:28:23	Ok	FALSE	Mila	PB	Spring	F6	PB065	-33.1359	18.0039	34	2	2016-09-09	2016-09-23	animal	0	0	NA	NA	springbok	1	springbok	1	Natural	NA	1 A U	flat	old road	2	NA	NA
I_00178c.JPG		PB065_Cam2_9-23Sep_2016	2016-09-23	08:28:23	Ok	FALSE	Mila	PB	Spring	F6	PB065	-33.1359	18.0039	34	2	2016-09-09	2016-09-23	animal	0	0	NA	NA	springbok	1	springbok	1	Natural	NA	1 A U	flat	old road	2	NA	NA
I_00002a.JPG		PB067_Cam002_26Aug-9Sep_2016	2016-08-27	09:54:20	Ok	FALSE	Mila	PB	Winter	F7	PB067	-33.1311	18.0123	76	2	2016-08-27	2016-09-09	animal	0	0	NA	NA	kudu	1	kudu	1	Natural	NA	NA	moderate	game trail	0	NA	adult female
I_00002b.JPG		PB067_Cam002_26Aug-9Sep_2016	2016-08-27	09:54:20	Ok	FALSE	Mila	PB	Winter	F7	PB067	-33.1311	18.0123	76	2	2016-08-27	2016-09-09	animal	0	0	NA	NA	kudu	1	kudu	1	Natural	NA	NA	moderate	game trail	0	NA	adult female
I_00002c.JPG		PB067_Cam002_26Aug-9Sep_2016	2016-08-27	09:54:20	Ok	FALSE	Mila	PB	Winter	F7	PB067	-33.1311	18.0123	76	2	2016-08-27	2016-09-09	animal	0	0	NA	NA	kudu	1	kudu	1	Natural	NA	NA	moderate	game trail	0	NA	adult female
I_00003a.JPG		PB067_Cam002_26Aug-9Sep_2016	2016-08-28	08:17:44	Ok	FALSE	Mila	PB	Winter	F7	PB067	-33.1311	18.0123	76	2	2016-08-27	2016-09-09	animal	0	0	NA	NA	kudu	1	kudu	1	Natural	NA	NA	moderate	game trail	0	NA	adult female
I_00003b.JPG		PB067_Cam002_26Aug-9Sep_2016	2016-08-28	08:17:44	Ok	FALSE	Mila	PB	Winter	F7	PB067	-33.1311	18.0123	76	2	2016-08-27	2016-09-09	animal	0	0	NA	NA	kudu	1	kudu	1	Natural	NA	NA	moderate	game trail	0	NA	adult female
I_00003c.JPG		PB067_Cam002_26Aug-9Sep_2016	2016-08-28	08:17:44	Ok	FALSE	Mila	PB	Winter	F7	PB067	-33.1311	18.0123	76	2	2016-08-27	2016-09-09	animal	0	0	NA	NA	kudu	2	kudu	2	Natural	NA	NA	moderate	game trail	0	NA	adult female
I_00004a.JPG		PB067_Cam002_26Aug-9Sep_2016	2016-08-28	08:22:16	Ok	FALSE	Mila	PB	Winter	F7	PB067	-33.1311	18.0123	76	2	2016-08-27	2016-09-09	animal	0	0	NA	NA	kudu	1	kudu	1	Natural	NA	NA	moderate	game trail	0	NA	adult female
I_00004b.JPG		PB067_Cam002_26Aug-9Sep_2016	2016-08-28	08:22:16	Ok	FALSE	Mila	PB	Winter	F7	PB067	-33.1311	18.0123	76	2	2016-08-27	2016-09-09	animal	0	0	NA	NA	kudu	1	kudu	1	Natural	NA	NA	moderate	game trail	0	NA	adult female
I_00004c.JPG		PB067_Cam002_26Aug-9Sep_2016	2016-08-28	08:22:16	Ok	FALSE	Mila	PB	Winter	F7	PB067	-33.1311	18.0123	76	2	2016-08-27	2016-09-09	animal	0	0	NA	NA	kudu	1	kudu	1	Natural	NA	NA	moderate	game trail	0	NA	adult female
I_00005a.JPG		PB067_Cam002_26Aug-9Sep_2016	2016-08-28	08:22:55	Ok	FALSE	Mila	PB	Winter	F7	PB067	-33.1311	18.0123	76	2	2016-08-27	2016-09-09	animal	0	0	NA	NA	kudu	2	kudu	2	Natural	NA	NA	moderate	game trail	0	NA	adult female
I_00005b.JPG		PB067_Cam002_26Aug-9Sep_2016	2016-08-28	08:22:55	Ok	FALSE	Mila	PB	Winter	F7	PB067	-33.1311	18.0123	76	2	2016-08-27	2016-09-09	animal	0	0	NA	NA	kudu	2	kudu	2	Natural	NA	NA	moderate	game trail	0	NA	adult female
I_00005c.JPG		PB067_Cam002_26Aug-9Sep_2016	2016-08-28	08:22:55	Ok	FALSE	Mila	PB	Winter	F7	PB067	-33.1311	18.0123	76	2	2016-08-27	2016-09-09	animal	0	0	NA	NA	kudu	2	kudu	2	Natural	NA	NA	moderate	game trail	0	NA	adult female
I_00006a.JPG		PB067_Cam002_26Aug-9Sep_2016	2016-08-28	08:23:18	Ok	FALSE	Mila	PB	Winter	F7	PB067	-33.1311	18.0123	76	2	2016-08-27	2016-09-09	animal	0	0	NA	NA	kudu	3	kudu	3	Natural	NA	NA	moderate	game trail	0	NA	adult female
I_00006b.JPG		PB067_Cam002_26Aug-9Sep_2016	2016-08-28	08:23:18	Ok	FALSE	Mila	PB	Winter	F7	PB067	-33.1311	18.0123	76	2	2016-08-27	2016-09-09	animal	0	0	NA	NA	kudu	3	kudu	3	Natural	NA	NA	moderate	game trail	0	NA	adult female
I_00006c.JPG		PB067_Cam002_26Aug-9Sep_2016	2016-08-28	08:23:18	Ok	FALSE	Mila	PB	Winter	F7	PB067	-33.1311	18.0123	76	2	2016-08-27	2016-09-09	animal	0	0	NA	NA	kudu	3	kudu	3	Natural	NA	NA	moderate	game trail	0	NA	adult female
I_00007b.JPG		PB067_Cam002_26Aug-9Sep_2016	2016-08-28	08:23:49	Ok	FALSE	Mila	PB	Winter	F7	PB067	-33.1311	18.0123	76	2	2016-08-27	2016-09-09	animal	0	0	NA	NA	kudu	1	kudu	1	Natural	NA	NA	moderate	game trail	0	NA	adult female
I_00007c.JPG		PB067_Cam002_26Aug-9Sep_2016	2016-08-28	08:23:49	Ok	FALSE	Mila	PB	Winter	F7	PB067	-33.1311	18.0123	76	2	2016-08-27	2016-09-09	animal	0	0	NA	NA	kudu	1	kudu	1	Natural	NA	NA	moderate	game trail	0	NA	adult female
I_00007a.JPG		PB067_Cam002_26Aug-9Sep_2016	2016-08-28	08:23:49	Ok	FALSE	Mila	PB	Winter	F7	PB067	-33.1311	18.0123	76	2	2016-08-27	2016-09-09	animal	0	0	NA	NA	kudu	2	kudu	2	Natural	NA	NA	moderate	game trail	0	NA	adult female
I_00008a.JPG		PB067_Cam002_26Aug-9Sep_2016	2016-08-28	08:25:29	Ok	FALSE	Mila	PB	Winter	F7	PB067	-33.1311	18.0123	76	2	2016-08-27	2016-09-09	animal	0	0	NA	NA	kudu	3	kudu	3	Natural	NA	NA	moderate	game trail	0	NA	adult female
I_00008b.JPG		PB067_Cam002_26Aug-9Sep_2016	2016-08-28	08:25:29	Ok	FALSE	Mila	PB	Winter	F7	PB067	-33.1311	18.0123	76	2	2016-08-27	2016-09-09	animal	0	0	NA	NA	kudu	3	kudu	3	Natural	NA	NA	moderate	game trail	0	NA	adult female
I_00008c.JPG		PB067_Cam002_26Aug-9Sep_2016	2016-08-28	08:25:29	Ok	FALSE	Mila	PB	Winter	F7	PB067	-33.1311	18.0123	76	2	2016-08-27	2016-09-09	animal	0	0	NA	NA	kudu	4	kudu	4	Natural	NA	3 A F, 1 A M	moderate	game trail	0	NA	NA
I_00009a.JPG		PB067_Cam002_26Aug-9Sep_2016	2016-08-28	08:25:52	Ok	FALSE	Mila	PB	Winter	F7	PB067	-33.1311	18.0123	76	2	2016-08-27	2016-09-09	animal	0	0	NA	NA	kudu	4	kudu	4	Natural	NA	NA	moderate	game trail	0	NA	adult female
I_00009b.JPG		PB067_Cam002_26Aug-9Sep_2016	2016-08-28	08:25:52	Ok	FALSE	Mila	PB	Winter	F7	PB067	-33.1311	18.0123	76	2	2016-08-27	2016-09-09	animal	0	0	NA	NA	kudu	4	kudu	4	Natural	NA	NA	moderate	game trail	0	NA	adult female
I_00009c.JPG		PB067_Cam002_26Aug-9Sep_2016	2016-08-28	08:25:52	Ok	FALSE	Mila	PB	Winter	F7	PB067	-33.1311	18.0123	76	2	2016-08-27	2016-09-09	animal	0	0	NA	NA	kudu	4	kudu	4	Natural	NA	NA	moderate	game trail	0	NA	adult female
I_00010a.JPG		PB067_Cam002_26Aug-9Sep_2016	2016-08-28	08:26:34	Ok	FALSE	Mila	PB	Winter	F7	PB067	-33.1311	18.0123	76	2	2016-08-27	2016-09-09	animal	0	0	NA	NA	kudu	3	kudu	3	Natural	NA	NA	moderate	game trail	0	NA	adult female
I_00010b.JPG		PB067_Cam002_26Aug-9Sep_2016	2016-08-28	08:26:34	Ok	FALSE	Mila	PB	Winter	F7	PB067	-33.1311	18.0123	76	2	2016-08-27	2016-09-09	animal	0	0	NA	NA	kudu	4	kudu	4	Natural	NA	NA	moderate	game trail	0	NA	adult female
I_00010c.JPG		PB067_Cam002_26Aug-9Sep_2016	2016-08-28	08:26:34	Ok	FALSE	Mila	PB	Winter	F7	PB067	-33.1311	18.0123	76	2	2016-08-27	2016-09-09	animal	0	0	NA	NA	kudu	4	kudu	4	Natural	NA	NA	moderate	game trail	0	NA	adult female
I_00011b.JPG		PB067_Cam002_26Aug-9Sep_2016	2016-08-28	08:27:00	Ok	FALSE	Mila	PB	Winter	F7	PB067	-33.1311	18.0123	76	2	2016-08-27	2016-09-09	animal	0	0	NA	NA	kudu	2	kudu	2	Natural	NA	NA	moderate	game trail	0	NA	adult female
I_00011c.JPG		PB067_Cam002_26Aug-9Sep_2016	2016-08-28	08:27:00	Ok	FALSE	Mila	PB	Winter	F7	PB067	-33.1311	18.0123	76	2	2016-08-27	2016-09-09	animal	0	0	NA	NA	kudu	2	kudu	2	Natural	NA	NA	moderate	game trail	0	NA	adult female
I_00011a.JPG		PB067_Cam002_26Aug-9Sep_2016	2016-08-28	08:27:00	Ok	FALSE	Mila	PB	Winter	F7	PB067	-33.1311	18.0123	76	2	2016-08-27	2016-09-09	animal	0	0	NA	NA	kudu	3	kudu	3	Natural	NA	NA	moderate	game trail	0	NA	adult female
I_00012a.JPG		PB067_Cam002_26Aug-9Sep_2016	2016-08-28	08:28:00	Ok	FALSE	Mila	PB	Winter	F7	PB067	-33.1311	18.0123	76	2	2016-08-27	2016-09-09	animal	0	0	NA	NA	kudu	2	kudu	2	Natural	NA	NA	moderate	game trail	0	NA	adult female
I_00012b.JPG		PB067_Cam002_26Aug-9Sep_2016	2016-08-28	08:28:00	Ok	FALSE	Mila	PB	Winter	F7	PB067	-33.1311	18.0123	76	2	2016-08-27	2016-09-09	animal	0	0	NA	NA	kudu	2	kudu	2	Natural	NA	NA	moderate	game trail	0	NA	adult female
I_00012c.JPG		PB067_Cam002_26Aug-9Sep_2016	2016-08-28	08:28:00	Ok	FALSE	Mila	PB	Winter	F7	PB067	-33.1311	18.0123	76	2	2016-08-27	2016-09-09	animal	0	0	NA	NA	kudu	2	kudu	2	Natural	NA	NA	moderate	game trail	0	NA	adult female
I_00013a.JPG		PB067_Cam002_26Aug-9Sep_2016	2016-08-28	08:28:44	Ok	FALSE	Mila	PB	Winter	F7	PB067	-33.1311	18.0123	76	2	2016-08-27	2016-09-09	animal	0	0	NA	NA	kudu	2	kudu	2	Natural	NA	NA	moderate	game trail	0	NA	adult female
I_00013b.JPG		PB067_Cam002_26Aug-9Sep_2016	2016-08-28	08:28:44	Ok	FALSE	Mila	PB	Winter	F7	PB067	-33.1311	18.0123	76	2	2016-08-27	2016-09-09	animal	0	0	NA	NA	kudu	3	kudu	3	Natural	NA	NA	moderate	game trail	0	NA	adult female
I_00013c.JPG		PB067_Cam002_26Aug-9Sep_2016	2016-08-28	08:28:44	Ok	FALSE	Mila	PB	Winter	F7	PB067	-33.1311	18.0123	76	2	2016-08-27	2016-09-09	animal	0	0	NA	NA	kudu	3	kudu	3	Natural	NA	NA	moderate	game trail	0	NA	adult female
I_00014a.JPG		PB067_Cam002_26Aug-9Sep_2016	2016-08-28	08:29:16	Ok	FALSE	Mila	PB	Winter	F7	PB067	-33.1311	18.0123	76	2	2016-08-27	2016-09-09	animal	0	0	NA	NA	kudu	2	kudu	2	Natural	NA	NA	moderate	game trail	0	NA	adult female
I_00014b.JPG		PB067_Cam002_26Aug-9Sep_2016	2016-08-28	08:29:16	Ok	FALSE	Mila	PB	Winter	F7	PB067	-33.1311	18.0123	76	2	2016-08-27	2016-09-09	animal	0	0	NA	NA	kudu	2	kudu	2	Natural	NA	NA	moderate	game trail	0	NA	adult female
I_00014c.JPG		PB067_Cam002_26Aug-9Sep_2016	2016-08-28	08:29:16	Ok	FALSE	Mila	PB	Winter	F7	PB067	-33.1311	18.0123	76	2	2016-08-27	2016-09-09	animal	0	0	NA	NA	kudu	4	kudu	4	Natural	NA	NA	moderate	game trail	0	NA	adult female
I_00015a.JPG		PB067_Cam002_26Aug-9Sep_2016	2016-08-28	08:29:38	Ok	FALSE	Mila	PB	Winter	F7	PB067	-33.1311	18.0123	76	2	2016-08-27	2016-09-09	animal	0	0	NA	NA	kudu	4	kudu	4	Natural	NA	NA	moderate	game trail	0	NA	adult female
I_00015b.JPG		PB067_Cam002_26Aug-9Sep_2016	2016-08-28	08:29:38	Ok	FALSE	Mila	PB	Winter	F7	PB067	-33.1311	18.0123	76	2	2016-08-27	2016-09-09	animal	0	0	NA	NA	kudu	4	kudu	4	Natural	NA	NA	moderate	game trail	0	NA	adult female
I_00015c.JPG		PB067_Cam002_26Aug-9Sep_2016	2016-08-28	08:29:38	Ok	FALSE	Mila	PB	Winter	F7	PB067	-33.1311	18.0123	76	2	2016-08-27	2016-09-09	animal	0	0	NA	NA	kudu	4	kudu	4	Natural	NA	NA	moderate	game trail	0	NA	adult female
I_00016a.JPG		PB067_Cam002_26Aug-9Sep_2016	2016-08-28	08:29:59	Ok	FALSE	Mila	PB	Winter	F7	PB067	-33.1311	18.0123	76	2	2016-08-27	2016-09-09	animal	0	0	NA	NA	kudu	3	kudu	3	Natural	NA	NA	moderate	game trail	0	NA	adult female
I_00016b.JPG		PB067_Cam002_26Aug-9Sep_2016	2016-08-28	08:29:59	Ok	FALSE	Mila	PB	Winter	F7	PB067	-33.1311	18.0123	76	2	2016-08-27	2016-09-09	animal	0	0	NA	NA	kudu	4	kudu	4	Natural	NA	NA	moderate	game trail	0	NA	adult female
I_00016c.JPG		PB067_Cam002_26Aug-9Sep_2016	2016-08-28	08:29:59	Ok	FALSE	Mila	PB	Winter	F7	PB067	-33.1311	18.0123	76	2	2016-08-27	2016-09-09	animal	0	0	NA	NA	kudu	4	kudu	4	Natural	NA	NA	moderate	game trail	0	NA	adult female
I_00017a.JPG		PB067_Cam002_26Aug-9Sep_2016	2016-08-28	08:30:20	Ok	FALSE	Mila	PB	Winter	F7	PB067	-33.1311	18.0123	76	2	2016-08-27	2016-09-09	animal	0	0	NA	NA	kudu	4	kudu	4	Natural	NA	NA	moderate	game trail	0	NA	adult female
I_00017b.JPG		PB067_Cam002_26Aug-9Sep_2016	2016-08-28	08:30:20	Ok	FALSE	Mila	PB	Winter	F7	PB067	-33.1311	18.0123	76	2	2016-08-27	2016-09-09	animal	0	0	NA	NA	kudu	4	kudu	4	Natural	NA	NA	moderate	game trail	0	NA	adult female
I_00017c.JPG		PB067_Cam002_26Aug-9Sep_2016	2016-08-28	08:30:20	Ok	FALSE	Mila	PB	Winter	F7	PB067	-33.1311	18.0123	76	2	2016-08-27	2016-09-09	animal	0	0	NA	NA	kudu	4	kudu	4	Natural	NA	NA	moderate	game trail	0	NA	adult female
I_00018a.JPG		PB067_Cam002_26Aug-9Sep_2016	2016-08-28	08:30:45	Ok	FALSE	Mila	PB	Winter	F7	PB067	-33.1311	18.0123	76	2	2016-08-27	2016-09-09	animal	0	0	NA	NA	kudu	4	kudu	4	Natural	NA	NA	moderate	game trail	0	NA	adult female
I_00018b.JPG		PB067_Cam002_26Aug-9Sep_2016	2016-08-28	08:30:45	Ok	FALSE	Mila	PB	Winter	F7	PB067	-33.1311	18.0123	76	2	2016-08-27	2016-09-09	animal	0	0	NA	NA	kudu	4	kudu	4	Natural	NA	NA	moderate	game trail	0	NA	adult female
I_00018c.JPG		PB067_Cam002_26Aug-9Sep_2016	2016-08-28	08:30:45	Ok	FALSE	Mila	PB	Winter	F7	PB067	-33.1311	18.0123	76	2	2016-08-27	2016-09-09	animal	0	0	NA	NA	kudu	4	kudu	4	Natural	NA	NA	moderate	game trail	0	NA	adult female
I_00019c.JPG		PB067_Cam002_26Aug-9Sep_2016	2016-08-28	08:31:08	Ok	FALSE	Mila	PB	Winter	F7	PB067	-33.1311	18.0123	76	2	2016-08-27	2016-09-09	animal	0	0	NA	NA	kudu	2	kudu	2	Natural	NA	NA	moderate	game trail	0	NA	adult female
I_00019b.JPG		PB067_Cam002_26Aug-9Sep_2016	2016-08-28	08:31:08	Ok	FALSE	Mila	PB	Winter	F7	PB067	-33.1311	18.0123	76	2	2016-08-27	2016-09-09	animal	0	0	NA	NA	kudu	3	kudu	3	Natural	NA	NA	moderate	game trail	0	NA	adult female
I_00019a.JPG		PB067_Cam002_26Aug-9Sep_2016	2016-08-28	08:31:08	Ok	FALSE	Mila	PB	Winter	F7	PB067	-33.1311	18.0123	76	2	2016-08-27	2016-09-09	animal	0	0	NA	NA	kudu	4	kudu	4	Natural	NA	NA	moderate	game trail	0	NA	adult female
I_00020a.JPG		PB067_Cam002_26Aug-9Sep_2016	2016-08-28	08:31:29	Ok	FALSE	Mila	PB	Winter	F7	PB067	-33.1311	18.0123	76	2	2016-08-27	2016-09-09	animal	0	0	NA	NA	kudu	2	kudu	2	Natural	NA	NA	moderate	game trail	0	NA	adult female
I_00020b.JPG		PB067_Cam002_26Aug-9Sep_2016	2016-08-28	08:31:29	Ok	FALSE	Mila	PB	Winter	F7	PB067	-33.1311	18.0123	76	2	2016-08-27	2016-09-09	animal	0	0	NA	NA	kudu	2	kudu	2	Natural	NA	NA	moderate	game trail	0	NA	adult female
I_00020c.JPG		PB067_Cam002_26Aug-9Sep_2016	2016-08-28	08:31:29	Ok	FALSE	Mila	PB	Winter	F7	PB067	-33.1311	18.0123	76	2	2016-08-27	2016-09-09	animal	0	0	NA	NA	kudu	2	kudu	2	Natural	NA	NA	moderate	game trail	0	NA	adult female
I_00021b.JPG		PB067_Cam002_26Aug-9Sep_2016	2016-08-28	08:31:52	Ok	FALSE	Mila	PB	Winter	F7	PB067	-33.1311	18.0123	76	2	2016-08-27	2016-09-09	animal	0	0	NA	NA	kudu	1	kudu	1	Natural	NA	NA	moderate	game trail	0	NA	adult female
I_00021c.JPG		PB067_Cam002_26Aug-9Sep_2016	2016-08-28	08:31:52	Ok	FALSE	Mila	PB	Winter	F7	PB067	-33.1311	18.0123	76	2	2016-08-27	2016-09-09	animal	0	0	NA	NA	kudu	1	kudu	1	Natural	NA	NA	moderate	game trail	0	NA	adult female
I_00021a.JPG		PB067_Cam002_26Aug-9Sep_2016	2016-08-28	08:31:52	Ok	FALSE	Mila	PB	Winter	F7	PB067	-33.1311	18.0123	76	2	2016-08-27	2016-09-09	animal	0	0	NA	NA	kudu	2	kudu	2	Natural	NA	NA	moderate	game trail	0	NA	adult female
I_00022a.JPG		PB067_Cam002_26Aug-9Sep_2016	2016-08-28	08:32:13	Ok	FALSE	Mila	PB	Winter	F7	PB067	-33.1311	18.0123	76	2	2016-08-27	2016-09-09	animal	0	0	NA	NA	kudu	1	kudu	1	Natural	NA	NA	moderate	game trail	0	NA	adult female
I_00022b.JPG		PB067_Cam002_26Aug-9Sep_2016	2016-08-28	08:32:13	Ok	FALSE	Mila	PB	Winter	F7	PB067	-33.1311	18.0123	76	2	2016-08-27	2016-09-09	animal	0	0	NA	NA	kudu	1	kudu	1	Natural	NA	NA	moderate	game trail	0	NA	adult female
I_00022c.JPG		PB067_Cam002_26Aug-9Sep_2016	2016-08-28	08:32:13	Ok	FALSE	Mila	PB	Winter	F7	PB067	-33.1311	18.0123	76	2	2016-08-27	2016-09-09	animal	0	0	NA	NA	kudu	1	kudu	1	Natural	NA	NA	moderate	game trail	0	NA	adult female
I_00023a.JPG		PB067_Cam002_26Aug-9Sep_2016	2016-08-28	08:32:34	Ok	FALSE	Mila	PB	Winter	F7	PB067	-33.1311	18.0123	76	2	2016-08-27	2016-09-09	animal	0	0	NA	NA	kudu	1	kudu	1	Natural	NA	NA	moderate	game trail	0	NA	adult female
I_00023b.JPG		PB067_Cam002_26Aug-9Sep_2016	2016-08-28	08:32:34	Ok	FALSE	Mila	PB	Winter	F7	PB067	-33.1311	18.0123	76	2	2016-08-27	2016-09-09	animal	0	0	NA	NA	kudu	1	kudu	1	Natural	NA	NA	moderate	game trail	0	NA	adult female
I_00023c.JPG		PB067_Cam002_26Aug-9Sep_2016	2016-08-28	08:32:34	Ok	FALSE	Mila	PB	Winter	F7	PB067	-33.1311	18.0123	76	2	2016-08-27	2016-09-09	animal	0	0	NA	NA	kudu	1	kudu	1	Natural	NA	NA	moderate	game trail	0	NA	adult female
I_00024a.JPG		PB067_Cam002_26Aug-9Sep_2016	2016-08-28	08:33:06	Ok	FALSE	Mila	PB	Winter	F7	PB067	-33.1311	18.0123	76	2	2016-08-27	2016-09-09	animal	0	0	NA	NA	kudu	1	kudu	1	Natural	NA	NA	moderate	game trail	0	NA	adult female
I_00024b.JPG		PB067_Cam002_26Aug-9Sep_2016	2016-08-28	08:33:06	Ok	FALSE	Mila	PB	Winter	F7	PB067	-33.1311	18.0123	76	2	2016-08-27	2016-09-09	animal	0	0	NA	NA	kudu	1	kudu	1	Natural	NA	NA	moderate	game trail	0	NA	adult female
I_00024c.JPG		PB067_Cam002_26Aug-9Sep_2016	2016-08-28	08:33:06	Ok	FALSE	Mila	PB	Winter	F7	PB067	-33.1311	18.0123	76	2	2016-08-27	2016-09-09	animal	0	0	NA	NA	kudu	1	kudu	1	Natural	NA	NA	moderate	game trail	0	NA	adult female
I_00025a.JPG		PB067_Cam002_26Aug-9Sep_2016	2016-08-30	17:31:43	Ok	FALSE	Mila	PB	Winter	F7	PB067	-33.1311	18.0123	76	2	2016-08-27	2016-09-09	animal	0	0	NA	NA	kudu	1	kudu	1	Natural	NA	NA	moderate	game trail	0	NA	adult male
I_00025b.JPG		PB067_Cam002_26Aug-9Sep_2016	2016-08-30	17:31:43	Ok	FALSE	Mila	PB	Winter	F7	PB067	-33.1311	18.0123	76	2	2016-08-27	2016-09-09	animal	0	0	NA	NA	kudu	1	kudu	1	Natural	NA	NA	moderate	game trail	0	NA	adult male
I_00025c.JPG		PB067_Cam002_26Aug-9Sep_2016	2016-08-30	17:31:43	Ok	FALSE	Mila	PB	Winter	F7	PB067	-33.1311	18.0123	76	2	2016-08-27	2016-09-09	animal	0	0	NA	NA	kudu	1	kudu	1	Natural	NA	NA	moderate	game trail	0	NA	adult male
I_00026a.JPG		PB067_Cam002_26Aug-9Sep_2016	2016-08-31	09:05:30	Ok	FALSE	Mila	PB	Winter	F7	PB067	-33.1311	18.0123	76	2	2016-08-27	2016-09-09	animal	0	0	NA	NA	kudu	1	kudu	1	Natural	NA	NA	moderate	game trail	0	NA	adult female
I_00026b.JPG		PB067_Cam002_26Aug-9Sep_2016	2016-08-31	09:05:30	Ok	FALSE	Mila	PB	Winter	F7	PB067	-33.1311	18.0123	76	2	2016-08-27	2016-09-09	animal	0	0	NA	NA	kudu	1	kudu	1	Natural	NA	NA	moderate	game trail	0	NA	adult female
I_00026c.JPG		PB067_Cam002_26Aug-9Sep_2016	2016-08-31	09:05:30	Ok	FALSE	Mila	PB	Winter	F7	PB067	-33.1311	18.0123	76	2	2016-08-27	2016-09-09	animal	0	0	NA	NA	kudu	1	kudu	1	Natural	NA	NA	moderate	game trail	0	NA	adult female
I_00027a.JPG		PB067_Cam002_26Aug-9Sep_2016	2016-08-31	09:05:58	Ok	FALSE	Mila	PB	Winter	F7	PB067	-33.1311	18.0123	76	2	2016-08-27	2016-09-09	animal	0	0	NA	NA	kudu	2	kudu	2	Natural	NA	NA	moderate	game trail	0	NA	adult female
I_00027b.JPG		PB067_Cam002_26Aug-9Sep_2016	2016-08-31	09:05:58	Ok	FALSE	Mila	PB	Winter	F7	PB067	-33.1311	18.0123	76	2	2016-08-27	2016-09-09	animal	0	0	NA	NA	kudu	2	kudu	2	Natural	NA	NA	moderate	game trail	0	NA	adult female
I_00027c.JPG		PB067_Cam002_26Aug-9Sep_2016	2016-08-31	09:05:58	Ok	FALSE	Mila	PB	Winter	F7	PB067	-33.1311	18.0123	76	2	2016-08-27	2016-09-09	animal	0	0	NA	NA	kudu	2	kudu	2	Natural	NA	NA	moderate	game trail	0	NA	adult female
I_00028a.JPG		PB067_Cam002_26Aug-9Sep_2016	2016-08-31	09:06:19	Ok	FALSE	Mila	PB	Winter	F7	PB067	-33.1311	18.0123	76	2	2016-08-27	2016-09-09	animal	0	0	NA	NA	kudu	2	kudu	2	Natural	NA	NA	moderate	game trail	0	NA	adult female
I_00028b.JPG		PB067_Cam002_26Aug-9Sep_2016	2016-08-31	09:06:19	Ok	FALSE	Mila	PB	Winter	F7	PB067	-33.1311	18.0123	76	2	2016-08-27	2016-09-09	animal	0	0	NA	NA	kudu	2	kudu	2	Natural	NA	NA	moderate	game trail	0	NA	adult female
I_00028c.JPG		PB067_Cam002_26Aug-9Sep_2016	2016-08-31	09:06:19	Ok	FALSE	Mila	PB	Winter	F7	PB067	-33.1311	18.0123	76	2	2016-08-27	2016-09-09	animal	0	0	NA	NA	kudu	2	kudu	2	Natural	NA	NA	moderate	game trail	0	NA	adult female
I_00029c.JPG		PB067_Cam002_26Aug-9Sep_2016	2016-08-31	09:06:40	Ok	FALSE	Mila	PB	Winter	F7	PB067	-33.1311	18.0123	76	2	2016-08-27	2016-09-09	animal	0	0	NA	NA	kudu	1	kudu	1	Natural	NA	NA	moderate	game trail	0	NA	adult female
I_00029a.JPG		PB067_Cam002_26Aug-9Sep_2016	2016-08-31	09:06:40	Ok	FALSE	Mila	PB	Winter	F7	PB067	-33.1311	18.0123	76	2	2016-08-27	2016-09-09	animal	0	0	NA	NA	kudu	2	kudu	2	Natural	NA	NA	moderate	game trail	0	NA	adult female
I_00029b.JPG		PB067_Cam002_26Aug-9Sep_2016	2016-08-31	09:06:40	Ok	FALSE	Mila	PB	Winter	F7	PB067	-33.1311	18.0123	76	2	2016-08-27	2016-09-09	animal	0	0	NA	NA	kudu	2	kudu	2	Natural	NA	NA	moderate	game trail	0	NA	adult female
I_00030b.JPG		PB067_Cam002_26Aug-9Sep_2016	2016-08-31	09:07:01	Ok	FALSE	Mila	PB	Winter	F7	PB067	-33.1311	18.0123	76	2	2016-08-27	2016-09-09	animal	0	0	NA	NA	kudu	1	kudu	1	Natural	NA	NA	moderate	game trail	0	NA	adult female
I_00030a.JPG		PB067_Cam002_26Aug-9Sep_2016	2016-08-31	09:07:01	Ok	FALSE	Mila	PB	Winter	F7	PB067	-33.1311	18.0123	76	2	2016-08-27	2016-09-09	animal	0	0	NA	NA	kudu	2	kudu	2	Natural	NA	NA	moderate	game trail	0	NA	adult female
I_00030c.JPG		PB067_Cam002_26Aug-9Sep_2016	2016-08-31	09:07:01	Ok	FALSE	Mila	PB	Winter	F7	PB067	-33.1311	18.0123	76	2	2016-08-27	2016-09-09	animal	0	0	NA	NA	kudu	2	kudu	2	Natural	NA	NA	moderate	game trail	0	NA	adult female
I_00031a.JPG		PB067_Cam002_26Aug-9Sep_2016	2016-08-31	09:07:23	Ok	FALSE	Mila	PB	Winter	F7	PB067	-33.1311	18.0123	76	2	2016-08-27	2016-09-09	animal	0	0	NA	NA	kudu	1	kudu	1	Natural	NA	NA	moderate	game trail	0	NA	adult female
I_00031b.JPG		PB067_Cam002_26Aug-9Sep_2016	2016-08-31	09:07:23	Ok	FALSE	Mila	PB	Winter	F7	PB067	-33.1311	18.0123	76	2	2016-08-27	2016-09-09	animal	0	0	NA	NA	kudu	1	kudu	1	Natural	NA	NA	moderate	game trail	0	NA	adult female
I_00031c.JPG		PB067_Cam002_26Aug-9Sep_2016	2016-08-31	09:07:23	Ok	FALSE	Mila	PB	Winter	F7	PB067	-33.1311	18.0123	76	2	2016-08-27	2016-09-09	animal	0	0	NA	NA	kudu	1	kudu	1	Natural	NA	NA	moderate	game trail	0	NA	adult female
I_00032a.JPG		PB067_Cam002_26Aug-9Sep_2016	2016-08-31	09:07:44	Ok	FALSE	Mila	PB	Winter	F7	PB067	-33.1311	18.0123	76	2	2016-08-27	2016-09-09	animal	0	0	NA	NA	kudu	1	kudu	1	Natural	NA	NA	moderate	game trail	0	NA	adult female
I_00032b.JPG		PB067_Cam002_26Aug-9Sep_2016	2016-08-31	09:07:44	Ok	FALSE	Mila	PB	Winter	F7	PB067	-33.1311	18.0123	76	2	2016-08-27	2016-09-09	animal	0	0	NA	NA	kudu	1	kudu	1	Natural	NA	NA	moderate	game trail	0	NA	adult female
I_00033a.JPG		PB067_Cam002_26Aug-9Sep_2016	2016-08-31	09:08:37	Ok	FALSE	Mila	PB	Winter	F7	PB067	-33.1311	18.0123	76	2	2016-08-27	2016-09-09	animal	0	0	NA	NA	kudu	1	kudu	1	Natural	NA	NA	moderate	game trail	0	NA	adult female
I_00033b.JPG		PB067_Cam002_26Aug-9Sep_2016	2016-08-31	09:08:37	Ok	FALSE	Mila	PB	Winter	F7	PB067	-33.1311	18.0123	76	2	2016-08-27	2016-09-09	animal	0	0	NA	NA	kudu	1	kudu	1	Natural	NA	NA	moderate	game trail	0	NA	adult female
I_00033c.JPG		PB067_Cam002_26Aug-9Sep_2016	2016-08-31	09:08:37	Ok	FALSE	Mila	PB	Winter	F7	PB067	-33.1311	18.0123	76	2	2016-08-27	2016-09-09	animal	0	0	NA	NA	kudu	1	kudu	1	Natural	NA	NA	moderate	game trail	0	NA	adult female
I_00034a.JPG		PB067_Cam002_26Aug-9Sep_2016	2016-08-31	09:09:06	Ok	FALSE	Mila	PB	Winter	F7	PB067	-33.1311	18.0123	76	2	2016-08-27	2016-09-09	animal	0	0	NA	NA	kudu	1	kudu	1	Natural	NA	NA	moderate	game trail	0	NA	adult female
I_00034b.JPG		PB067_Cam002_26Aug-9Sep_2016	2016-08-31	09:09:06	Ok	FALSE	Mila	PB	Winter	F7	PB067	-33.1311	18.0123	76	2	2016-08-27	2016-09-09	animal	0	0	NA	NA	kudu	1	kudu	1	Natural	NA	NA	moderate	game trail	0	NA	adult female
I_00034c.JPG		PB067_Cam002_26Aug-9Sep_2016	2016-08-31	09:09:06	Ok	FALSE	Mila	PB	Winter	F7	PB067	-33.1311	18.0123	76	2	2016-08-27	2016-09-09	animal	0	0	NA	NA	kudu	1	kudu	1	Natural	NA	NA	moderate	game trail	0	NA	adult female
I_00035a.JPG		PB067_Cam002_26Aug-9Sep_2016	2016-08-31	09:09:27	Ok	FALSE	Mila	PB	Winter	F7	PB067	-33.1311	18.0123	76	2	2016-08-27	2016-09-09	animal	0	0	NA	NA	kudu	1	kudu	1	Natural	NA	NA	moderate	game trail	0	NA	adult female
I_00035b.JPG		PB067_Cam002_26Aug-9Sep_2016	2016-08-31	09:09:27	Ok	FALSE	Mila	PB	Winter	F7	PB067	-33.1311	18.0123	76	2	2016-08-27	2016-09-09	animal	0	0	NA	NA	kudu	1	kudu	1	Natural	NA	NA	moderate	game trail	0	NA	adult female
I_00035c.JPG		PB067_Cam002_26Aug-9Sep_2016	2016-08-31	09:09:27	Ok	FALSE	Mila	PB	Winter	F7	PB067	-33.1311	18.0123	76	2	2016-08-27	2016-09-09	animal	0	0	NA	NA	kudu	1	kudu	1	Natural	NA	NA	moderate	game trail	0	NA	adult female
I_00037a.JPG		PB067_Cam002_26Aug-9Sep_2016	2016-09-01	02:10:27	Ok	FALSE	Mila	PB	Spring	F7	PB067	-33.1311	18.0123	76	2	2016-08-27	2016-09-09	animal	0	0	NA	NA	kudu	1	kudu	1	Natural	NA	Species unknown	moderate	game trail	0	NA	NA
I_00037b.JPG		PB067_Cam002_26Aug-9Sep_2016	2016-09-01	02:10:27	Ok	FALSE	Mila	PB	Spring	F7	PB067	-33.1311	18.0123	76	2	2016-08-27	2016-09-09	animal	0	0	NA	NA	kudu	1	kudu	1	Natural	NA	Species unknown	moderate	game trail	0	NA	NA
I_00037c.JPG		PB067_Cam002_26Aug-9Sep_2016	2016-09-01	02:10:27	Ok	FALSE	Mila	PB	Spring	F7	PB067	-33.1311	18.0123	76	2	2016-08-27	2016-09-09	animal	0	0	NA	NA	kudu	1	kudu	1	Natural	NA	Species unknown	moderate	game trail	0	NA	NA
I_00038a.JPG		PB067_Cam002_26Aug-9Sep_2016	2016-09-01	02:11:40	Ok	FALSE	Mila	PB	Spring	F7	PB067	-33.1311	18.0123	76	2	2016-08-27	2016-09-09	animal	0	0	NA	NA	kudu	1	kudu	1	Natural	NA	Species unknown	moderate	game trail	0	NA	NA
I_00038b.JPG		PB067_Cam002_26Aug-9Sep_2016	2016-09-01	02:11:40	Ok	FALSE	Mila	PB	Spring	F7	PB067	-33.1311	18.0123	76	2	2016-08-27	2016-09-09	animal	0	0	NA	NA	kudu	1	kudu	1	Natural	NA	Species unknown	moderate	game trail	0	NA	NA
I_00038c.JPG		PB067_Cam002_26Aug-9Sep_2016	2016-09-01	02:11:40	Ok	FALSE	Mila	PB	Spring	F7	PB067	-33.1311	18.0123	76	2	2016-08-27	2016-09-09	animal	0	0	NA	NA	kudu	1	kudu	1	Natural	NA	Species unknown	moderate	game trail	0	NA	NA
I_00039a.JPG		PB067_Cam002_26Aug-9Sep_2016	2016-09-01	02:12:05	Ok	FALSE	Mila	PB	Spring	F7	PB067	-33.1311	18.0123	76	2	2016-08-27	2016-09-09	animal	0	0	NA	NA	kudu	1	kudu	1	Natural	NA	Species unknown	moderate	game trail	0	NA	NA
I_00040a.JPG		PB067_Cam002_26Aug-9Sep_2016	2016-09-01	02:12:30	Ok	FALSE	Mila	PB	Spring	F7	PB067	-33.1311	18.0123	76	2	2016-08-27	2016-09-09	animal	0	0	NA	NA	kudu	1	kudu	1	Natural	NA	NA	moderate	game trail	0	NA	adult female
I_00040b.JPG		PB067_Cam002_26Aug-9Sep_2016	2016-09-01	02:12:30	Ok	FALSE	Mila	PB	Spring	F7	PB067	-33.1311	18.0123	76	2	2016-08-27	2016-09-09	animal	0	0	NA	NA	kudu	1	kudu	1	Natural	NA	NA	moderate	game trail	0	NA	adult female
I_00041a.JPG		PB067_Cam002_26Aug-9Sep_2016	2016-09-05	07:55:05	Ok	FALSE	Mila	PB	Spring	F7	PB067	-33.1311	18.0123	76	2	2016-08-27	2016-09-09	animal	0	0	NA	NA	kudu	2	kudu	2	Natural	NA	NA	moderate	game trail	0	NA	adult female
I_00041b.JPG		PB067_Cam002_26Aug-9Sep_2016	2016-09-05	07:55:05	Ok	FALSE	Mila	PB	Spring	F7	PB067	-33.1311	18.0123	76	2	2016-08-27	2016-09-09	animal	0	0	NA	NA	kudu	3	kudu	3	Natural	NA	NA	moderate	game trail	0	NA	adult female
I_00041c.JPG		PB067_Cam002_26Aug-9Sep_2016	2016-09-05	07:55:05	Ok	FALSE	Mila	PB	Spring	F7	PB067	-33.1311	18.0123	76	2	2016-08-27	2016-09-09	animal	0	0	NA	NA	kudu	3	kudu	3	Natural	NA	NA	moderate	game trail	0	NA	adult female
I_00042a.JPG		PB067_Cam002_26Aug-9Sep_2016	2016-09-05	07:55:48	Ok	FALSE	Mila	PB	Spring	F7	PB067	-33.1311	18.0123	76	2	2016-08-27	2016-09-09	animal	0	0	NA	NA	kudu	4	kudu	4	Natural	NA	NA	moderate	game trail	0	NA	adult female
I_00042b.JPG		PB067_Cam002_26Aug-9Sep_2016	2016-09-05	07:55:48	Ok	FALSE	Mila	PB	Spring	F7	PB067	-33.1311	18.0123	76	2	2016-08-27	2016-09-09	animal	0	0	NA	NA	kudu	4	kudu	4	Natural	NA	NA	moderate	game trail	0	NA	adult female
I_00042c.JPG		PB067_Cam002_26Aug-9Sep_2016	2016-09-05	07:55:48	Ok	FALSE	Mila	PB	Spring	F7	PB067	-33.1311	18.0123	76	2	2016-08-27	2016-09-09	animal	0	0	NA	NA	kudu	4	kudu	4	Natural	NA	NA	moderate	game trail	0	NA	adult female
I_00043a.JPG		PB067_Cam002_26Aug-9Sep_2016	2016-09-05	07:56:20	Ok	FALSE	Mila	PB	Spring	F7	PB067	-33.1311	18.0123	76	2	2016-08-27	2016-09-09	animal	0	0	NA	NA	kudu	5	kudu	5	Natural	NA	NA	moderate	game trail	0	NA	adult female
I_00043c.JPG		PB067_Cam002_26Aug-9Sep_2016	2016-09-05	07:56:20	Ok	FALSE	Mila	PB	Spring	F7	PB067	-33.1311	18.0123	76	2	2016-08-27	2016-09-09	animal	0	0	NA	NA	kudu	5	kudu	5	Natural	NA	NA	moderate	game trail	0	NA	adult female
I_00043b.JPG		PB067_Cam002_26Aug-9Sep_2016	2016-09-05	07:56:20	Ok	FALSE	Mila	PB	Spring	F7	PB067	-33.1311	18.0123	76	2	2016-08-27	2016-09-09	animal	0	0	NA	NA	kudu	7	kudu	7	Natural	NA	NA	moderate	game trail	0	NA	adult female
I_00044b.JPG		PB067_Cam002_26Aug-9Sep_2016	2016-09-05	07:56:49	Ok	FALSE	Mila	PB	Spring	F7	PB067	-33.1311	18.0123	76	2	2016-08-27	2016-09-09	animal	0	0	NA	NA	kudu	6	kudu	6	Natural	NA	NA	moderate	game trail	0	NA	adult female
I_00044a.JPG		PB067_Cam002_26Aug-9Sep_2016	2016-09-05	07:56:49	Ok	FALSE	Mila	PB	Spring	F7	PB067	-33.1311	18.0123	76	2	2016-08-27	2016-09-09	animal	0	0	NA	NA	kudu	7	kudu	7	Natural	NA	NA	moderate	game trail	0	NA	adult female
I_00044c.JPG		PB067_Cam002_26Aug-9Sep_2016	2016-09-05	07:56:49	Ok	FALSE	Mila	PB	Spring	F7	PB067	-33.1311	18.0123	76	2	2016-08-27	2016-09-09	animal	0	0	NA	NA	kudu	7	kudu	7	Natural	NA	NA	moderate	game trail	0	NA	adult female
I_00045a.JPG		PB067_Cam002_26Aug-9Sep_2016	2016-09-05	07:57:11	Ok	FALSE	Mila	PB	Spring	F7	PB067	-33.1311	18.0123	76	2	2016-08-27	2016-09-09	animal	0	0	NA	NA	kudu	6	kudu	6	Natural	NA	NA	moderate	game trail	0	NA	adult female
I_00045b.JPG		PB067_Cam002_26Aug-9Sep_2016	2016-09-05	07:57:11	Ok	FALSE	Mila	PB	Spring	F7	PB067	-33.1311	18.0123	76	2	2016-08-27	2016-09-09	animal	0	0	NA	NA	kudu	6	kudu	6	Natural	NA	NA	moderate	game trail	0	NA	adult female
I_00045c.JPG		PB067_Cam002_26Aug-9Sep_2016	2016-09-05	07:57:11	Ok	FALSE	Mila	PB	Spring	F7	PB067	-33.1311	18.0123	76	2	2016-08-27	2016-09-09	animal	0	0	NA	NA	kudu	6	kudu	6	Natural	NA	NA	moderate	game trail	0	NA	adult female
I_00046b.JPG		PB067_Cam002_26Aug-9Sep_2016	2016-09-05	07:57:32	Ok	FALSE	Mila	PB	Spring	F7	PB067	-33.1311	18.0123	76	2	2016-08-27	2016-09-09	animal	0	0	NA	NA	kudu	5	kudu	5	Natural	NA	NA	moderate	game trail	0	NA	adult female
I_00046c.JPG		PB067_Cam002_26Aug-9Sep_2016	2016-09-05	07:57:32	Ok	FALSE	Mila	PB	Spring	F7	PB067	-33.1311	18.0123	76	2	2016-08-27	2016-09-09	animal	0	0	NA	NA	kudu	5	kudu	5	Natural	NA	NA	moderate	game trail	0	NA	adult female
I_00046a.JPG		PB067_Cam002_26Aug-9Sep_2016	2016-09-05	07:57:32	Ok	FALSE	Mila	PB	Spring	F7	PB067	-33.1311	18.0123	76	2	2016-08-27	2016-09-09	animal	0	0	NA	NA	kudu	6	kudu	6	Natural	NA	NA	moderate	game trail	0	NA	adult female
I_00047c.JPG		PB067_Cam002_26Aug-9Sep_2016	2016-09-05	07:57:57	Ok	FALSE	Mila	PB	Spring	F7	PB067	-33.1311	18.0123	76	2	2016-08-27	2016-09-09	animal	0	0	NA	NA	kudu	2	kudu	2	Natural	NA	NA	moderate	game trail	0	NA	adult female
I_00047a.JPG		PB067_Cam002_26Aug-9Sep_2016	2016-09-05	07:57:57	Ok	FALSE	Mila	PB	Spring	F7	PB067	-33.1311	18.0123	76	2	2016-08-27	2016-09-09	animal	0	0	NA	NA	kudu	3	kudu	3	Natural	NA	NA	moderate	game trail	0	NA	adult female
I_00047b.JPG		PB067_Cam002_26Aug-9Sep_2016	2016-09-05	07:57:57	Ok	FALSE	Mila	PB	Spring	F7	PB067	-33.1311	18.0123	76	2	2016-08-27	2016-09-09	animal	0	0	NA	NA	kudu	3	kudu	3	Natural	NA	NA	moderate	game trail	0	NA	adult female
I_00048c.JPG		PB067_Cam002_26Aug-9Sep_2016	2016-09-05	08:00:24	Ok	FALSE	Mila	PB	Spring	F7	PB067	-33.1311	18.0123	76	2	2016-08-27	2016-09-09	animal	0	0	NA	NA	kudu	2	kudu	2	Natural	NA	NA	moderate	game trail	0	NA	adult female
I_00048a.JPG		PB067_Cam002_26Aug-9Sep_2016	2016-09-05	08:00:24	Ok	FALSE	Mila	PB	Spring	F7	PB067	-33.1311	18.0123	76	2	2016-08-27	2016-09-09	animal	0	0	NA	NA	kudu	3	kudu	3	Natural	NA	NA	moderate	game trail	0	NA	adult female
I_00048b.JPG		PB067_Cam002_26Aug-9Sep_2016	2016-09-05	08:00:24	Ok	FALSE	Mila	PB	Spring	F7	PB067	-33.1311	18.0123	76	2	2016-08-27	2016-09-09	animal	0	0	NA	NA	kudu	3	kudu	3	Natural	NA	NA	moderate	game trail	0	NA	adult female
I_00049a.JPG		PB067_Cam002_26Aug-9Sep_2016	2016-09-05	08:07:04	Ok	FALSE	Mila	PB	Spring	F7	PB067	-33.1311	18.0123	76	2	2016-08-27	2016-09-09	animal	0	0	NA	NA	kudu	1	kudu	1	Natural	NA	NA	moderate	game trail	0	NA	adult female
I_00049b.JPG		PB067_Cam002_26Aug-9Sep_2016	2016-09-05	08:07:04	Ok	FALSE	Mila	PB	Spring	F7	PB067	-33.1311	18.0123	76	2	2016-08-27	2016-09-09	animal	0	0	NA	NA	kudu	1	kudu	1	Natural	NA	NA	moderate	game trail	0	NA	adult female
I_00049c.JPG		PB067_Cam002_26Aug-9Sep_2016	2016-09-05	08:07:04	Ok	FALSE	Mila	PB	Spring	F7	PB067	-33.1311	18.0123	76	2	2016-08-27	2016-09-09	animal	0	0	NA	NA	kudu	1	kudu	1	Natural	NA	NA	moderate	game trail	0	NA	adult female
I_00050a.JPG		PB067_Cam002_26Aug-9Sep_2016	2016-09-05	08:07:26	Ok	FALSE	Mila	PB	Spring	F7	PB067	-33.1311	18.0123	76	2	2016-08-27	2016-09-09	animal	0	0	NA	NA	kudu	1	kudu	1	Natural	NA	NA	moderate	game trail	0	NA	adult female
I_00050c.JPG		PB067_Cam002_26Aug-9Sep_2016	2016-09-05	08:07:26	Ok	FALSE	Mila	PB	Spring	F7	PB067	-33.1311	18.0123	76	2	2016-08-27	2016-09-09	animal	0	0	NA	NA	kudu	1	kudu	1	Natural	NA	NA	moderate	game trail	0	NA	adult male
I_00050b.JPG		PB067_Cam002_26Aug-9Sep_2016	2016-09-05	08:07:26	Ok	FALSE	Mila	PB	Spring	F7	PB067	-33.1311	18.0123	76	2	2016-08-27	2016-09-09	animal	0	0	NA	NA	kudu	2	kudu	2	Natural	NA	1 A F, 1 A M	moderate	game trail	0	NA	NA
I_00051a.JPG		PB067_Cam002_26Aug-9Sep_2016	2016-09-05	08:07:49	Ok	FALSE	Mila	PB	Spring	F7	PB067	-33.1311	18.0123	76	2	2016-08-27	2016-09-09	animal	0	0	NA	NA	kudu	1	kudu	1	Natural	NA	NA	moderate	game trail	0	NA	adult female
I_00051b.JPG		PB067_Cam002_26Aug-9Sep_2016	2016-09-05	08:07:49	Ok	FALSE	Mila	PB	Spring	F7	PB067	-33.1311	18.0123	76	2	2016-08-27	2016-09-09	animal	0	0	NA	NA	kudu	1	kudu	1	Natural	NA	NA	moderate	game trail	0	NA	adult female
I_00051c.JPG		PB067_Cam002_26Aug-9Sep_2016	2016-09-05	08:07:49	Ok	FALSE	Mila	PB	Spring	F7	PB067	-33.1311	18.0123	76	2	2016-08-27	2016-09-09	animal	0	0	NA	NA	kudu	1	kudu	1	Natural	NA	NA	moderate	game trail	0	NA	adult female
I_00052a.JPG		PB067_Cam002_26Aug-9Sep_2016	2016-09-05	08:08:10	Ok	FALSE	Mila	PB	Spring	F7	PB067	-33.1311	18.0123	76	2	2016-08-27	2016-09-09	animal	0	0	NA	NA	kudu	1	kudu	1	Natural	NA	NA	moderate	game trail	0	NA	adult female
I_00053a.JPG		PB067_Cam002_26Aug-9Sep_2016	2016-09-06	08:10:52	Ok	FALSE	Mila	PB	Spring	F7	PB067	-33.1311	18.0123	76	2	2016-08-27	2016-09-09	animal	0	0	NA	NA	kudu	1	kudu	1	Natural	NA	NA	moderate	game trail	0	NA	adult female
I_00053b.JPG		PB067_Cam002_26Aug-9Sep_2016	2016-09-06	08:10:52	Ok	FALSE	Mila	PB	Spring	F7	PB067	-33.1311	18.0123	76	2	2016-08-27	2016-09-09	animal	0	0	NA	NA	kudu	1	kudu	1	Natural	NA	NA	moderate	game trail	0	NA	adult female
I_00053c.JPG		PB067_Cam002_26Aug-9Sep_2016	2016-09-06	08:10:52	Ok	FALSE	Mila	PB	Spring	F7	PB067	-33.1311	18.0123	76	2	2016-08-27	2016-09-09	animal	0	0	NA	NA	kudu	1	kudu	1	Natural	NA	NA	moderate	game trail	0	NA	adult female
I_00054a.JPG		PB067_Cam002_26Aug-9Sep_2016	2016-09-06	08:11:19	Ok	FALSE	Mila	PB	Spring	F7	PB067	-33.1311	18.0123	76	2	2016-08-27	2016-09-09	animal	0	0	NA	NA	kudu	1	kudu	1	Natural	NA	NA	moderate	game trail	0	NA	adult female
I_00054b.JPG		PB067_Cam002_26Aug-9Sep_2016	2016-09-06	08:11:19	Ok	FALSE	Mila	PB	Spring	F7	PB067	-33.1311	18.0123	76	2	2016-08-27	2016-09-09	animal	0	0	NA	NA	kudu	1	kudu	1	Natural	NA	NA	moderate	game trail	0	NA	adult female
I_00054c.JPG		PB067_Cam002_26Aug-9Sep_2016	2016-09-06	08:11:19	Ok	FALSE	Mila	PB	Spring	F7	PB067	-33.1311	18.0123	76	2	2016-08-27	2016-09-09	animal	0	0	NA	NA	kudu	1	kudu	1	Natural	NA	NA	moderate	game trail	0	NA	adult female
I_00056b.JPG		PB067_Cam002_26Aug-9Sep_2016	2016-09-08	11:15:06	Ok	FALSE	Mila	PB	Spring	F7	PB067	-33.1311	18.0123	76	2	2016-08-27	2016-09-09	animal	0	0	NA	NA	kudu	1	kudu	1	Natural	NA	NA	moderate	game trail	0	NA	adult female
[truncated: 1,046 more rows]

## Sheet: precullblank photos
File	RelativePath	Folder	Date	Time	ImageQuality	MarkForDeletion	Analyser	Area_code	Sampling_period	Grid_number	Site_ID	Latitude	Longitude	Elevation_m	Camera_ID	Start_date	End_date	Photo_type	Caracal_present	Caracal_number	Behaviour	Prey_species	Other_species	Other_species_count	Species	Habitat_state	Notes	Comments	Slope	Trail_type	Trail_use_intensity	caracal_sex	Oher_spp_sex_age
[truncated: 4,291 more rows]

[truncated: 9 more sheets: Postberg_Image_Data, PB_non-animal_photos, Langebaan_Image_Data, Langebaan_non-animal_photos, Farm_Image_Data, Farm_non_animal, Opportunistic sites survey, OpportunisticSurvey No-animals, OthersitesRaw]
