# Supplementary material for: Investigating the effects of management practice on mammalian co-occurrence along the West Coast of South Africa
Source: PeerJ. 2020 Jan 27;8:e8184. doi: 10.7717/peerj.8184 (PMC6991126; doi:10.7717/peerj.8184)
Supplement: Dataset S2 [file peerj-08-8184-s004.xlsx]

## Sheet: Headings
Removals	Culls or captures, does not include natural mortalities in the veld
Introductions	Total live introductions of a species

## Sheet: Sheet2
Species	Bontebok	Eland	Grey rhebok	Mountain zebra	Plains zebra	Ostrich	Red hartebeest	Blue Wildebeest	Gemsbok	Black Wildebeest	Springbok	Kudu	Steenbok	Common Duiker	Blesbok	Mountain Reedbuck
1986	6	10	0	0	9	0	5	8	4	5	38	5			15	32
1989	32	74	0	0	7	94	0	114	32	2	95	6			0	0
1990	51	99	3	0	7	131	0	96	27	1	66	19			0	0
1991	51	119	0	0	6	107	0	121	20	1	34	0			0	0
Removals 1992	0	45	0	0	0	60	0	70		1	0	0			0	0
1992	54	144	0	0	9	54	0	60	23	0	22	6			0	0
Removals 1993	10	29	0	0	0	44	0	58	0	0	0	0			0	0
1993	66	140	0	0	10	140	0	140	28	0	45	15			0	0
Removals 1994	0	32	0	0	0	0	0	28	0	0	0	0			0	0
1994	53	71	0	8	11	87	6	41	29	0	28	17			0	0
Removals 1995	0	30	0	0	11	0	0	34	0	0	0	0			0	0
1995	72	92	0	1	0	80	14	67	36	0	17	0			0	0
Removals 1996	12	40	0	0	7	0	0	29	0	0	0	0			0	0
1996	31	41	1	1	2	34	4	17	17	0	74	0			0	0
Removals 1997	4	14	0	0	4	0	0	15	0	0	0	0			0	0
1997	99	59	0	4	1	121	20	28	42	0	106	0			0	0
1998	87	47	2	8	0	125	36	15	56	0	135	3			0	0
Removals 1999	3	5	0	0	0	151	0	0	0	0	0	0			0	0
1999	87	46	2	10	0	104	3	22	64	0	176	0			0	0
Removals 2000	0	9	0	0	0	0	0	10	15	0	26	0			0	0
2000	32	33	0	8	0	31	17	11	25	0	88	12			0	0
2001	39	37	2	8	0	34	11	10	21	0	123	11			0	0
2002	56	56	0	10	0	75	14	15	25	0	88	27			0	0
2003	25	70	0	10	0	93	4	6	31	0	99	54			0	0
2005	82	107	0	10	0	554	58	25	32	0	99	32			0	0
Removals 2008	0	93	0	0	0	0	0	0	0	0	0	0			0	0
2008	78	182	7	7	0	792	71	31	16	0	47	28			0	0
2009	110	135	0	16	0	122	0	22	46	0	80	14			0	0
2010	135	166	0	20	0	130	0	37	34	0	78	52			0	0
Removals 2011	0	10	0	0	0	0	0	0	0	0	0	5			0	0
2011	76	95	0	21	0	125	0	17	26	0	71	52			0	0
Removals 2012	0	64	0	0	0	15*	0	1	0	0	0	19			0	0
2012	75	119	0	27	0	97	0	13	48	0	75	59			0	0
Removals 2013	0	0	0	0	0	9^	0	0	0	0	0	0			0	0
2013	82	82	0	27	0	84	0	11	22	0	61	68			0	0
Introductions 2014	0	0	0	0	0	0	40	0	0	0	0	0	0	0	0	0
2014	89	95	0	33	0	103		7	59	0	64	40	2		0	0
2015	51	516	0	33	0	491	37	11	24	0	32	110	47	7	0	0
2016	33	113	4	36	0	74	40	9	18	0	37	54	4	2	0	0
