# Supplementary material for: Investigating the effects of management practice on mammalian co-occurrence along the West Coast of South Africa
Source: PeerJ journal article supplement (doi:10.7717/peerj.8184), 2020-01-27

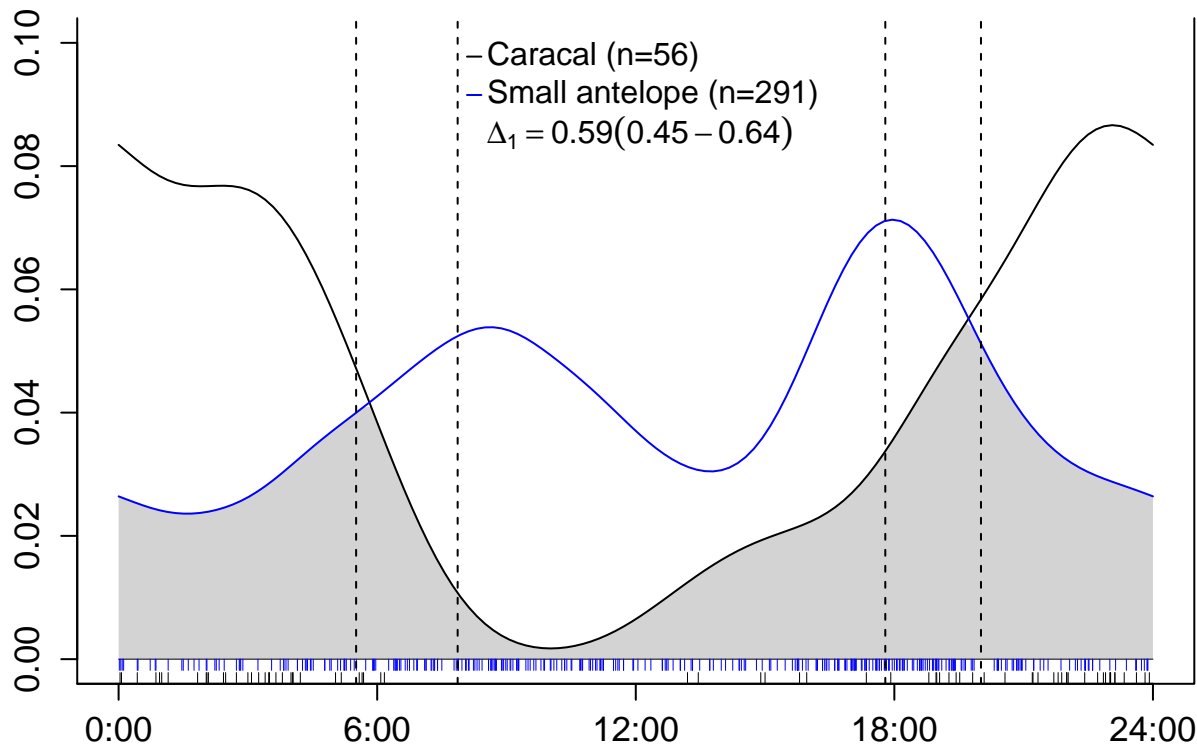

Supplement: SuppFig1.pdf [file SuppFig1.pdf]
